# Supplementary material for: Knowledge-Based Analysis for Detecting Key Signaling Events from Time-Series Phosphoproteomics Data
Source: PLoS Comput Biol. 2015 Aug 7;11(8):e1004403. doi: 10.1371/journal.pcbi.1004403 (PMC4529189; doi:10.1371/journal.pcbi.1004403)
Supplement: S1 Table — (XLSX) [file pcbi.1004403.s003.xlsx]

## Sheet: hES cell differentiation
Phosphorylation site	cluster 1	cluster 2	cluster 3	cluster 4	cluster 5	cluster 6	cluster 7	cluster 8	cluster 9	cluster 10	cluster 11
SFRS4;118;	0.010889	0.00011324	0.561463	3.01271e-05	0.423117	0.00184068	0.000139171	0.000283128	0.00117171	5.85682e-05	0.000893983
SFRS4;119;	0.00686016	7.99546e-05	0.750773	2.21193e-05	0.239123	0.00143351	0.000104808	0.000225173	0.000831623	4.04338e-05	0.000506592
PPP2R5D;88;	0.00111442	0.0227915	0.000220445	0.106889	0.000471255	0.000622185	0.00306949	0.00391601	0.00123035	0.836327	0.023348
PPP2R5D;89;	0.00182158	0.0267406	0.000287206	0.059383	0.000754913	0.000775081	0.00312863	0.00385628	0.00169473	0.833482	0.0680764
PPP2R5D;90;	0.000671803	0.00857677	0.000139564	0.0368774	0.000362297	0.000341472	0.0023108	0.00196751	0.00104358	0.921969	0.0257394
PPP2R5D;95;	0.00128252	0.0179065	0.000223714	0.0508291	0.000585837	0.000582846	0.00282977	0.00306325	0.00143877	0.87263	0.0486272
NP60;167;	0.000194376	3.2658e-05	0.996949	2.58607e-05	0.000866963	0.000722525	0.00015196	0.000790158	0.000230869	1.78503e-05	1.7878e-05
USP15;244;	0.000550332	0.000125505	0.00225557	0.000129818	0.0931789	0.00011814	0.0150293	0.0441591	0.839242	0.00450053	0.000710707
UTP18;227;	0.999687	2.38668e-05	8.64727e-05	6.6904e-07	6.63118e-05	9.46705e-05	3.73087e-07	3.09699e-06	1.30591e-06	6.4392e-07	3.51599e-05
KIF22;562;	0.958445	0.000260287	0.00635371	1.47518e-05	0.0331633	0.000592407	2.25321e-05	0.000373151	0.00013831	3.12214e-05	0.000605618
CHD4;1531;	0.0123162	0.000188936	0.000999221	2.73972e-05	0.977101	0.000107306	0.000140645	0.00173538	0.00271674	0.000384431	0.00428239
CHD4;1535;	0.448651	0.00242022	0.0038121	0.000170476	0.483738	0.000875116	0.000369959	0.00561006	0.0037301	0.0014994	0.0491236
CHD4;1537;	0.0792046	0.00533887	0.00937767	0.000747847	0.420098	0.00141105	0.00305967	0.429103	0.0272325	0.0109128	0.0135131
CHD4;308;	0.0139011	0.978073	0.000214858	0.000493396	9.85217e-05	0.0012083	2.62358e-05	0.00568055	2.65302e-05	0.000117615	0.000159821
CHD4;309;	0.0139011	0.978073	0.000214858	0.000493396	9.85217e-05	0.0012083	2.62358e-05	0.00568055	2.65302e-05	0.000117615	0.000159821
CHD4;310;	0.0139011	0.978073	0.000214858	0.000493396	9.85217e-05	0.0012083	2.62358e-05	0.00568055	2.65302e-05	0.000117615	0.000159821
CHD4;319;	0.0139011	0.978073	0.000214858	0.000493396	9.85217e-05	0.0012083	2.62358e-05	0.00568055	2.65302e-05	0.000117615	0.000159821
CHD4;325;	0.0136267	0.98461	8.11621e-05	0.000130804	3.43761e-05	0.000715557	6.67653e-06	0.000686116	7.42575e-06	2.86478e-05	7.28702e-05
CHD4;328;	0.0136267	0.98461	8.11621e-05	0.000130804	3.43761e-05	0.000715557	6.67653e-06	0.000686116	7.42575e-06	2.86478e-05	7.28702e-05
CHD4;330;	0.0136267	0.98461	8.11621e-05	0.000130804	3.43761e-05	0.000715557	6.67653e-06	0.000686116	7.42575e-06	2.86478e-05	7.28702e-05
CHD4;332;	0.0136267	0.98461	8.11621e-05	0.000130804	3.43761e-05	0.000715557	6.67653e-06	0.000686116	7.42575e-06	2.86478e-05	7.28702e-05
CHD4;335;	0.0136267	0.98461	8.11621e-05	0.000130804	3.43761e-05	0.000715557	6.67653e-06	0.000686116	7.42575e-06	2.86478e-05	7.28702e-05
CHD4;337;	0.0136267	0.98461	8.11621e-05	0.000130804	3.43761e-05	0.000715557	6.67653e-06	0.000686116	7.42575e-06	2.86478e-05	7.28702e-05
CHD4;1544;	0.993737	0.000414457	0.000194377	1.07653e-05	0.00280251	0.000112698	9.07201e-06	0.000149655	4.84619e-05	3.75066e-05	0.00248309
CHD4;515;	0.0318592	0.00284092	0.0069561	0.00060129	0.56772	0.000895264	0.00412018	0.305131	0.0531721	0.0140928	0.0126117
RDBP;249;	0.00136536	0.235476	0.000886031	0.725454	0.000158141	0.00948361	0.000751866	0.0243244	0.000182352	0.00160681	0.000311286
RDBP;251;	0.00136536	0.235476	0.000886031	0.725454	0.000158141	0.00948361	0.000751866	0.0243244	0.000182352	0.00160681	0.000311286
RDBP;174;	0.00227883	0.141577	0.0008676	0.263894	0.000521458	0.00231013	0.00323483	0.558327	0.000878118	0.0250454	0.00106559
RDBP;178;	0.00227883	0.141577	0.0008676	0.263894	0.000521458	0.00231013	0.00323483	0.558327	0.000878118	0.0250454	0.00106559
RDBP;179;	0.00227883	0.141577	0.0008676	0.263894	0.000521458	0.00231013	0.00323483	0.558327	0.000878118	0.0250454	0.00106559
RDBP;181;	0.00227883	0.141577	0.0008676	0.263894	0.000521458	0.00231013	0.00323483	0.558327	0.000878118	0.0250454	0.00106559
RDBP;185;	0.00227446	0.143258	0.000870843	0.27993	0.00052132	0.00233971	0.00328389	0.540093	0.000882974	0.0254682	0.00107647
RDBP;113;	0.000346528	0.0108572	0.000676762	0.95059	6.08364e-05	0.0358652	0.000409085	0.000564433	7.8162e-05	0.000351735	0.000200106
RDBP;115;	0.00141375	0.0640029	0.00172592	0.710291	0.000153072	0.219343	0.000562038	0.00112459	0.000147215	0.000633674	0.000602407
EML4;144;	1.67199e-06	2.96284e-06	2.45263e-06	2.95696e-05	1.34967e-05	1.10919e-06	0.00934256	4.80549e-05	0.00120872	0.989314	3.5892e-05
EML4;146;	6.81513e-07	1.36056e-06	9.14982e-07	1.48558e-05	4.63637e-06	4.58567e-07	0.00261646	1.97244e-05	0.000310795	0.997015	1.47267e-05
EML4;150;	1.67199e-06	2.96284e-06	2.45263e-06	2.95696e-05	1.34967e-05	1.10919e-06	0.00934256	4.80549e-05	0.00120872	0.989314	3.5892e-05
EML4;151;	1.67199e-06	2.96284e-06	2.45263e-06	2.95696e-05	1.34967e-05	1.10919e-06	0.00934256	4.80549e-05	0.00120872	0.989314	3.5892e-05
EML4;138;	5.26346e-08	1.25895e-08	1.99178e-07	2.12144e-08	2.39215e-05	1.56632e-08	8.83308e-06	3.42069e-07	0.999964	1.94729e-06	6.21128e-07
KIAA1522;1030;	1.3905e-05	7.02807e-07	0.000117441	4.62665e-07	0.998212	2.53423e-06	1.52653e-05	5.50234e-06	0.00158496	4.82634e-06	4.27144e-05
KIAA1522;1038;	1.3905e-05	7.02807e-07	0.000117441	4.62665e-07	0.998212	2.53423e-06	1.52653e-05	5.50234e-06	0.00158496	4.82634e-06	4.27144e-05
PCM1;468;	4.49399e-05	0.000165542	7.45192e-05	0.00332062	0.000152119	4.25307e-05	0.113432	0.0117357	0.00375756	0.867072	0.000201751
PCM1;469;	4.49399e-05	0.000165542	7.45192e-05	0.00332062	0.000152119	4.25307e-05	0.113432	0.0117357	0.00375756	0.867072	0.000201751
PCM1;470;	4.97023e-06	1.77471e-05	6.20271e-06	0.000285879	1.72256e-05	3.81747e-06	0.00721942	0.000677723	0.000439031	0.991293	3.48256e-05
PCM1;1374;	0.000287357	0.000475993	0.00585683	0.00105302	7.16442e-05	0.9919	0.000107023	9.23751e-05	4.42042e-05	3.39484e-05	7.76155e-05
PCM1;1296;	0.000112284	6.024e-05	4.03687e-05	7.09432e-05	0.0002719	4.65208e-05	0.00012517	2.05552e-05	0.000326527	0.000769563	0.998156
PCM1;1299;	0.000112284	6.024e-05	4.03687e-05	7.09432e-05	0.0002719	4.65208e-05	0.00012517	2.05552e-05	0.000326527	0.000769563	0.998156
PCM1;1301;	0.000112284	6.024e-05	4.03687e-05	7.09432e-05	0.0002719	4.65208e-05	0.00012517	2.05552e-05	0.000326527	0.000769563	0.998156
PCM1;65;	6.28106e-06	1.15251e-05	9.9348e-06	0.000154466	4.56613e-05	5.26772e-06	0.0364679	8.86368e-05	0.00338499	0.959616	0.000209142
PCM1;68;	6.28106e-06	1.15251e-05	9.9348e-06	0.000154466	4.56613e-05	5.26772e-06	0.0364679	8.86368e-05	0.00338499	0.959616	0.000209142
PCM1;69;	1.45167e-05	2.77474e-05	2.19083e-05	0.000409243	9.19318e-05	1.33553e-05	0.0439963	0.00013623	0.00485381	0.949789	0.000645862
PSAT1;331;	0.000195793	0.172127	5.46716e-05	0.825286	1.85475e-05	0.000779315	8.31874e-05	0.000840554	2.24849e-05	0.000480797	0.000112088
NUP88;517;	5.33404e-05	1.57961e-06	0.00158732	7.77093e-07	0.997884	1.01937e-05	1.32506e-05	1.09791e-05	0.000400601	3.80905e-06	3.3709e-05
NUP88;35;	5.34586e-05	0.998662	4.13205e-06	0.001092	2.00429e-06	5.06758e-05	2.95792e-06	9.26986e-05	1.44987e-06	2.55414e-05	1.33408e-05
NUP88;50;	5.34586e-05	0.998662	4.13205e-06	0.001092	2.00429e-06	5.06758e-05	2.95792e-06	9.26986e-05	1.44987e-06	2.55414e-05	1.33408e-05
F11R;281;	0.006832	9.5002e-05	0.671876	2.945e-05	0.316898	0.00176731	0.00015107	0.000240732	0.00125366	5.58362e-05	0.000800402
F11R;287;	1.53258e-05	1.61754e-05	0.000331128	8.20445e-06	1.60925e-06	0.999622	9.43358e-07	2.78896e-06	5.61048e-07	3.90698e-07	1.01359e-06
TACC3;317;	1.48731e-05	0.999981	1.20899e-07	9.15572e-07	6.15023e-08	2.06127e-06	1.92086e-08	6.66266e-07	1.80854e-08	1.18402e-07	4.10779e-07
TACC3;329;	0.188329	0.808675	0.000135692	0.000124024	7.02073e-05	0.0020533	7.64096e-06	0.000220158	1.05878e-05	3.37716e-05	0.000340407
TACC3;250;	0.314443	0.000439921	0.00878326	3.68412e-05	0.670394	0.000623306	9.47789e-05	0.00140049	0.000918266	0.000145659	0.00272028
TACC3;434;	0.000836284	0.998458	9.72304e-06	6.27124e-05	3.29758e-06	0.000575406	1.03161e-06	1.14804e-05	9.29609e-07	4.54471e-06	3.68779e-05
KPNA2;54;	0.973438	0.000248218	0.00177471	1.40827e-05	0.0201899	0.000492886	1.77419e-05	0.000109717	0.000112837	3.38358e-05	0.00356832
KPNA2;62;	9.86291e-05	1.11472e-05	0.00224859	1.24865e-05	0.366649	3.52386e-05	0.00173688	0.000334559	0.62852	0.000162582	0.000190883
TAOK1;9;	5.66936e-05	3.9247e-05	0.0029911	2.16559e-05	7.97358e-06	0.996861	4.01161e-06	1.09101e-05	2.58089e-06	1.41148e-06	3.7027e-06
ANKRD11;1984;	1.81767e-05	1.29127e-06	6.93804e-05	8.36464e-07	0.985762	2.19113e-06	4.35559e-05	3.36274e-05	0.0140063	1.89087e-05	4.38004e-05
ANKRD11;1991;	1.81767e-05	1.29127e-06	6.93804e-05	8.36464e-07	0.985762	2.19113e-06	4.35559e-05	3.36274e-05	0.0140063	1.89087e-05	4.38004e-05
NUFIP2;629;	0.0184223	0.000967393	0.95295	0.000144453	0.00440394	0.0147714	0.00017316	0.00759752	0.000334052	7.80533e-05	0.000157707
NUFIP2;637;	0.00397266	0.000292002	0.979913	5.33232e-05	0.000845924	0.0135643	5.20523e-05	0.00116032	8.22707e-05	2.00805e-05	4.40402e-05
NUFIP2;212;	1.53061e-05	5.90228e-05	5.58721e-06	0.000151831	2.87532e-05	4.36689e-06	0.000316411	0.00105706	0.000190081	0.99804	0.000131628
NUFIP2;214;	1.53061e-05	5.90228e-05	5.58721e-06	0.000151831	2.87532e-05	4.36689e-06	0.000316411	0.00105706	0.000190081	0.99804	0.000131628
NUFIP2;216;	7.09177e-05	0.000292878	1.82566e-05	0.000459589	0.000100084	1.59636e-05	0.000557511	0.00309753	0.000439401	0.994323	0.000625288
NUFIP2;652;	0.000677174	0.998111	1.2342e-05	0.000475603	1.16477e-05	0.000152709	6.27478e-06	6.41766e-05	5.35871e-06	8.19321e-05	0.000401494
NUFIP2;655;	0.000677174	0.998111	1.2342e-05	0.000475603	1.16477e-05	0.000152709	6.27478e-06	6.41766e-05	5.35871e-06	8.19321e-05	0.000401494
NUFIP2;692;	6.83766e-06	0.999987	1.07692e-07	2.07612e-06	4.94989e-08	3.20138e-06	2.21873e-08	3.3396e-07	1.79178e-08	1.39648e-07	6.13555e-07
EPN1;533;	0.00252168	0.0101073	0.0420165	0.690138	0.00223452	0.14775	0.0767219	0.0121349	0.00612736	0.00785699	0.00239124
EPN1;540;	0.00252168	0.0101073	0.0420165	0.690138	0.00223452	0.14775	0.0767219	0.0121349	0.00612736	0.00785699	0.00239124
XRCC1;241;	5.05062e-05	0.000309136	8.14742e-05	0.0406952	0.000105671	8.74455e-05	0.0976363	0.00219002	0.00178368	0.856676	0.00038409
XRCC1;266;	1.29697e-05	8.7363e-06	2.8758e-05	3.26542e-05	0.000501012	5.70234e-06	0.0476884	0.000268814	0.916765	0.0344445	0.000243039
XRCC1;268;	1.17175e-05	6.76767e-06	2.3181e-05	2.13343e-05	0.00056201	4.55825e-06	0.0164062	0.000149816	0.962951	0.0195517	0.000312134
XRCC1;446;	0.000439512	4.95937e-05	0.0021241	3.61133e-05	0.655377	6.63672e-05	0.00245416	0.00552425	0.332626	0.000817791	0.000485387
XRCC1;447;	5.90933e-07	1.29946e-08	6.48592e-07	3.93315e-09	0.999995	2.16424e-08	5.25886e-08	1.52572e-07	2.64492e-06	4.75852e-08	4.45437e-07
PIK3C2A;59;	8.49897e-06	1.01451e-06	0.999714	6.49272e-07	1.15003e-05	0.000258461	1.32209e-06	2.22194e-06	1.87842e-06	2.34529e-07	7.04409e-07
PIK3C2A;60;	0.000220562	1.3617e-05	0.995503	3.31394e-06	5.66744e-05	0.00416934	3.23078e-06	1.97811e-05	5.16356e-06	1.07256e-06	3.90604e-06
PIK3C2A;259;	2.67724e-05	1.41066e-05	6.89609e-05	1.15467e-06	5.60933e-07	0.999887	1.23874e-07	9.54326e-07	1.08836e-07	8.74515e-08	3.56449e-07
LIN28;183;	0.000563424	0.000121872	0.0640272	3.08484e-05	5.61269e-05	0.935113	1.02746e-05	4.93561e-05	1.00252e-05	4.04699e-06	1.39596e-05
LIN28;200;	6.29539e-06	6.72223e-06	2.34038e-05	8.51577e-07	2.02316e-07	0.999962	6.90503e-08	4.53771e-07	5.06949e-08	4.51583e-08	1.46983e-07
SFRS7;194;	0.00935219	0.00139965	0.533522	0.00219977	0.233829	0.0269817	0.0313083	0.00262319	0.122325	0.00396214	0.0324966
SFRS7;171;	0.176758	0.00497955	0.0269962	0.000364464	0.002183	0.783845	0.000100165	0.000261104	0.000181676	0.000109889	0.00422072
SFRS7;173;	0.00156525	0.124291	0.000942649	0.777414	0.000138391	0.092514	0.000422533	0.000775959	0.000128029	0.000784529	0.00102421
SFRS7;175;	0.0014598	0.130582	0.00085319	0.781405	0.00012579	0.0826807	0.000383908	0.000753095	0.000116092	0.000727728	0.000912566
SFRS7;163;	0.00131677	0.0716586	0.00173369	0.735859	0.000139432	0.186091	0.000534922	0.00152861	0.000134577	0.000573911	0.000428992
SFRS7;165;	0.00235358	0.230325	0.00119315	0.620291	0.000173578	0.141946	0.000443473	0.000964474	0.000146284	0.000868998	0.0012953
SFRS7;167;	0.00203994	0.0647565	0.00389091	0.277915	0.000208789	0.647164	0.000651595	0.00219776	0.00017775	0.000541679	0.000455653
SFRS7;202;	0.000575364	0.00808164	0.00243083	0.934495	0.00028508	0.00763008	0.00853859	0.0337122	0.000728752	0.00324039	0.00028159
SFRS7;204;	0.000400145	0.00728384	0.00136474	0.959024	0.000166301	0.00542208	0.00401384	0.0197575	0.000387212	0.00199369	0.000186771
DBN1;141;	0.000106165	2.8613e-05	0.00543355	8.51888e-05	0.0141086	0.000151188	0.057725	0.000446236	0.920943	0.000605426	0.000366561
DBN1;142;	3.13784e-05	8.87812e-06	0.00134566	2.54841e-05	0.00491404	3.57083e-05	0.0307402	0.000258782	0.962311	0.000241994	8.6957e-05
DBN1;337;	0.025023	0.887738	0.00311239	0.00535548	0.000462117	0.0252235	0.000221669	0.051839	0.000158979	0.00046699	0.000399133
DBN1;339;	0.00482464	0.993228	7.09128e-05	0.000123738	1.60573e-05	0.00137485	4.19139e-06	0.000310068	3.8879e-06	1.31771e-05	3.05939e-05
DBN1;341;	0.0073334	0.990615	8.76942e-05	0.00014605	2.41991e-05	0.0011649	5.83969e-06	0.000552836	5.70943e-06	2.0067e-05	4.40993e-05
DBN1;342;	0.0073334	0.990615	8.76942e-05	0.00014605	2.41991e-05	0.0011649	5.83969e-06	0.000552836	5.70943e-06	2.0067e-05	4.40993e-05
DBN1;345;	0.00375169	0.993053	0.000115492	0.000299664	2.54926e-05	0.00166937	8.9892e-06	0.000999916	7.42297e-06	2.76946e-05	4.12386e-05
MAPRE2;200;	2.32575e-07	1.85859e-07	2.11818e-06	1.39108e-06	6.80126e-06	2.67842e-07	0.991253	1.0423e-05	0.00866401	5.98975e-05	1.18442e-06
EFTUD2;19;	0.00278121	0.0155287	0.000345276	0.0155799	0.0010787	0.00103991	0.00174584	0.00121807	0.00156352	0.108371	0.850748
SLC9A3R1;280;	0.0607754	0.00119726	0.803651	0.000100302	0.00186051	0.13114	5.93499e-05	0.000897962	0.000109927	3.52584e-05	0.000173218
SLC9A3R1;269;	0.00180189	0.00199511	0.00454439	0.000145816	4.52354e-05	0.991179	1.36256e-05	0.000232614	1.05041e-05	9.68709e-06	2.20693e-05
SLC9A3R1;288;	0.358609	0.000621112	0.0325882	7.2689e-05	0.587662	0.00299514	0.000160408	0.000516706	0.00132984	0.000186647	0.0152582
SLC9A3R1;290;	0.528278	0.00090698	0.0208249	9.67313e-05	0.40674	0.00336572	0.000184307	0.000550293	0.00145341	0.000261345	0.0373382
SLC9A3R1;291;	0.528278	0.00090698	0.0208249	9.67313e-05	0.40674	0.00336572	0.000184307	0.000550293	0.00145341	0.000261345	0.0373382
MAP2K2;293;	0.000346183	3.73952e-05	0.996349	1.16029e-05	0.000162871	0.00287184	1.48775e-05	0.000172993	2.10309e-05	4.1004e-06	7.97625e-06
MAP2K2;295;	0.000346183	3.73952e-05	0.996349	1.16029e-05	0.000162871	0.00287184	1.48775e-05	0.000172993	2.10309e-05	4.1004e-06	7.97625e-06
TJP2;978;	0.000331384	0.0900461	8.84775e-05	0.8988	5.31474e-05	0.000529375	0.000353864	0.00446359	8.84003e-05	0.00489953	0.000346086
TJP2;979;	4.59897e-05	5.45346e-06	0.00016493	4.91353e-06	0.215451	7.58572e-06	0.000515879	0.000177054	0.78322	0.000197466	0.000209693
TJP2;986;	2.89636e-05	7.67848e-06	5.1142e-05	9.55985e-06	0.00623847	5.32193e-06	0.00160426	0.000455064	0.989651	0.00171955	0.000228492
TJP2;1156;	0.00326855	0.0382057	0.0200492	0.323211	0.000659187	0.596291	0.00328754	0.0122619	0.000695056	0.00139398	0.000676665
TJP2;1159;	0.00170519	0.0181579	0.00957675	0.0791434	0.000263701	0.886488	0.0008762	0.00283607	0.000227208	0.000416494	0.000308976
TJP2;292;	1.87882e-06	2.60143e-06	1.64129e-05	3.24762e-05	1.95824e-05	3.02149e-06	0.997447	0.000355061	0.00168244	0.00043461	4.72588e-06
TJP2;294;	1.87882e-06	2.60143e-06	1.64129e-05	3.24762e-05	1.95824e-05	3.02149e-06	0.997447	0.000355061	0.00168244	0.00043461	4.72588e-06
TJP2;296;	1.87882e-06	2.60143e-06	1.64129e-05	3.24762e-05	1.95824e-05	3.02149e-06	0.997447	0.000355061	0.00168244	0.00043461	4.72588e-06
TJP2;441;	9.16156e-06	1.22856e-05	3.25637e-05	0.000194986	0.000101706	1.26066e-05	0.960366	9.29513e-05	0.0156171	0.0233475	0.000212776
TJP2;447;	5.25338e-08	7.67462e-08	3.29705e-07	1.7308e-06	5.41216e-07	1.05348e-07	0.999872	1.0148e-06	7.95351e-05	4.38063e-05	4.98992e-07
TJP2;424;	0.000867279	0.000297146	0.128291	0.000930087	0.0387029	0.00189216	0.339095	0.0127904	0.473425	0.00281639	0.000892668
TJP2;430;	0.000836161	0.000288632	0.0985493	0.000847592	0.0389889	0.00153365	0.32394	0.0181061	0.513171	0.00294841	0.000790121
TJP2;431;	0.000871923	0.000229396	0.128556	0.000541752	0.0697849	0.00135074	0.15196	0.0108613	0.632892	0.00211131	0.000841048
TJP2;432;	0.0007304	0.000317644	0.0663424	0.00112156	0.0225309	0.0014931	0.522266	0.0259389	0.355043	0.00353878	0.000677
TJP2;966;	2.5668e-08	7.16846e-09	9.32357e-08	1.34196e-08	7.63405e-06	8.11387e-09	7.64717e-06	2.30555e-07	0.999982	1.58267e-06	2.9525e-07
TJP2;920;	6.57148e-05	0.000678291	0.000100373	0.916807	7.49995e-05	0.000221383	0.0172983	0.000867526	0.000612726	0.0627856	0.00048792
TJP2;1048;	0.000532911	0.000412926	0.000269956	0.000886622	0.00414631	0.000162867	0.00922244	0.000709605	0.0344772	0.406204	0.542975
TJP2;1067;	0.000499601	0.000406492	0.000231092	0.000843538	0.00331977	0.000150612	0.00690316	0.000608889	0.0232649	0.342899	0.620873
TJP2;1068;	0.000532911	0.000412926	0.000269956	0.000886622	0.00414631	0.000162867	0.00922244	0.000709605	0.0344772	0.406204	0.542975
TJP2;961;	2.0079e-05	2.69916e-05	1.34011e-05	0.000113572	0.000132305	8.24626e-06	0.00210949	8.88169e-05	0.002865	0.991262	0.0033597
SLC2A3;485;	0.000183319	0.000411243	4.61677e-05	1.26134e-05	1.85769e-06	0.999336	5.19291e-07	2.9322e-06	4.29878e-07	6.26001e-07	4.13158e-06
EPB41;188;	0.00312945	0.000125463	4.18856e-05	1.1884e-05	0.00140428	3.20584e-05	1.42419e-05	3.88645e-05	9.27761e-05	0.000126756	0.994982
EPB41;151;	8.99144e-06	3.1519e-06	0.000164528	1.18602e-05	0.000974244	1.02971e-05	0.0259002	4.44997e-05	0.972623	0.000190201	6.92836e-05
EPB41;152;	8.99144e-06	3.1519e-06	0.000164528	1.18602e-05	0.000974244	1.02971e-05	0.0259002	4.44997e-05	0.972623	0.000190201	6.92836e-05
PPID;198;	0.000332228	0.985162	6.6615e-05	0.0115492	1.21172e-05	0.00222931	2.01381e-05	0.000519682	8.13691e-06	6.09399e-05	3.92042e-05
PPID;201;	0.000318812	0.984588	6.35042e-05	0.0112756	1.06046e-05	0.00334675	1.67074e-05	0.000285492	6.85119e-06	4.78342e-05	4.00639e-05
USP9X;1600;	0.000395252	0.000217319	0.0126954	0.00155892	0.00827118	0.00143312	0.735847	0.00125691	0.231338	0.00469194	0.00229532
USP9X;2443;	0.000117509	1.10558e-05	0.00308988	1.13029e-05	0.750556	4.13938e-05	0.00110461	0.000226912	0.24449	0.000122523	0.000229136
USP9X;2448;	9.06235e-06	1.50966e-06	0.000189996	2.44829e-06	0.00956374	4.6199e-06	0.000832962	3.96764e-05	0.989285	3.98983e-05	3.08628e-05
USP9X;2452;	9.06235e-06	1.50966e-06	0.000189996	2.44829e-06	0.00956374	4.6199e-06	0.000832962	3.96764e-05	0.989285	3.98983e-05	3.08628e-05
MKI67;579;	5.8637e-06	1.47155e-05	1.71605e-05	0.000571438	3.2029e-05	9.49546e-06	0.931446	0.000166495	0.00200116	0.0656685	6.76481e-05
MKI67;584;	9.93607e-07	2.19167e-06	4.0043e-06	8.43516e-05	6.21747e-06	1.92513e-06	0.996191	2.66494e-05	0.000458714	0.00321415	9.62643e-06
MKI67;1098;	0.000554694	0.00218829	0.00426334	0.109491	0.00119235	0.00239906	0.701187	0.138678	0.0112094	0.0282157	0.000621894
MKI67;1375;	1.04805e-05	4.95884e-07	8.54459e-05	3.1206e-07	0.998955	1.80058e-06	9.50868e-06	3.79146e-06	0.00089997	3.14972e-06	2.9688e-05
MKI67;859;	0.00429431	0.0103587	0.216739	0.08552	0.00268102	0.636954	0.0186844	0.0175835	0.00351203	0.00241067	0.00126158
MKI67;2588;	2.50322e-05	3.44508e-06	0.999437	3.83668e-06	0.000214186	0.000202906	3.02961e-05	1.85112e-05	5.59961e-05	2.70369e-06	5.79279e-06
MKI67;1496;	0.00230785	0.000555792	0.0229208	0.000498392	0.0906133	0.000743267	0.0212091	0.725459	0.130794	0.0040543	0.000843921
ADD3;677;	0.121136	0.00641374	0.000346027	0.000193553	0.00338853	0.000560186	8.67106e-05	0.000488828	0.000319925	0.000920182	0.866146
ADD3;679;	2.92661e-06	5.72676e-06	1.43235e-06	2.38501e-05	1.13952e-05	1.10547e-06	0.000160587	1.63801e-05	0.000148297	0.999275	0.000353761
ADD3;681;	0.19682	0.0044605	0.00155583	0.000261374	0.00525965	0.00403733	0.000114938	0.000249216	0.000373429	0.000420081	0.786447
WNK1;2027;	0.448313	0.0408623	0.000786942	0.000632989	0.0051882	0.00161816	0.000194428	0.0017395	0.000587769	0.00228596	0.49779
WNK1;2029;	0.448313	0.0408623	0.000786942	0.000632989	0.0051882	0.00161816	0.000194428	0.0017395	0.000587769	0.00228596	0.49779
WNK1;2032;	0.448313	0.0408623	0.000786942	0.000632989	0.0051882	0.00161816	0.000194428	0.0017395	0.000587769	0.00228596	0.49779
WNK1;2002;	1.62556e-05	1.9514e-05	6.72478e-06	3.6131e-05	0.000105234	3.37246e-06	0.000477896	0.000188821	0.00133454	0.99702	0.000791163
WNK1;2005;	1.64188e-05	1.93024e-05	7.13608e-06	3.62256e-05	0.000113434	3.43181e-06	0.000546359	0.000216637	0.00157223	0.996766	0.000703261
WNK1;2011;	0.000726532	0.000316448	0.000408582	0.000395765	0.0232483	0.000113306	0.0152552	0.00350859	0.427519	0.475152	0.0533563
WNK1;2012;	0.000924641	0.00031491	0.000532154	0.000340708	0.0456747	0.000127589	0.0135147	0.00362697	0.650968	0.222023	0.0619524
WNK1;2020;	6.69378e-05	8.85388e-05	1.94892e-05	0.000110188	0.00028858	1.0702e-05	0.000713445	0.000935077	0.00186783	0.993874	0.00202534
PFAS;530;	1.16249e-06	2.04967e-06	5.15818e-07	5.42212e-06	5.29247e-06	3.07336e-07	5.30652e-05	1.85338e-05	7.07393e-05	0.999798	4.44631e-05
PFAS;540;	1.16249e-06	2.04967e-06	5.15818e-07	5.42212e-06	5.29247e-06	3.07336e-07	5.30652e-05	1.85338e-05	7.07393e-05	0.999798	4.44631e-05
CNOT2;165;	2.13063e-05	1.13744e-05	5.06034e-06	1.0194e-05	4.74762e-05	5.61636e-06	1.69939e-05	3.98053e-06	5.18745e-05	0.000189847	0.999636
MYBBP1A;775;	0.0101749	0.0546966	0.000314358	0.00457845	0.000997671	0.0012462	0.000415768	0.00102746	0.000563356	0.0129866	0.912999
MYBBP1A;792;	0.00147148	0.00351944	6.81535e-05	0.00063592	0.000240599	0.000242465	9.26905e-05	0.000121475	0.00013962	0.00212935	0.991339
MYBBP1A;795;	0.00147148	0.00351944	6.81535e-05	0.00063592	0.000240599	0.000242465	9.26905e-05	0.000121475	0.00013962	0.00212935	0.991339
MYBBP1A;11;	0.04351	0.000247684	0.165216	3.87956e-05	0.785669	0.00121492	0.00015467	0.00183128	0.00133941	9.71705e-05	0.000681225
MYBBP1A;18;	0.0215373	0.000195395	0.134933	3.55943e-05	0.837688	0.00084851	0.000174883	0.00234543	0.00163536	9.90629e-05	0.000507478
MYBBP1A;1267;	0.0631944	0.000238412	0.00504898	2.51662e-05	0.926897	0.000283726	8.80888e-05	0.00164125	0.00103574	0.000129892	0.00141759
MYBBP1A;1232;	1.69385e-06	1.05299e-06	7.58608e-06	5.30351e-06	8.18068e-05	1.19245e-06	0.0631973	2.39264e-05	0.935631	0.00102214	2.66937e-05
MYBBP1A;1241;	1.55461e-07	1.4289e-07	9.15207e-07	1.22927e-06	3.78924e-06	1.62174e-07	0.994667	5.30976e-06	0.00518622	0.000133701	1.28466e-06
MYBBP1A;1243;	1.57945e-06	1.22144e-06	8.31879e-06	8.26513e-06	5.22444e-05	1.38386e-06	0.803552	3.69122e-05	0.195059	0.00126176	1.721e-05
RBM5;59;	0.00230167	0.0109545	0.000235856	0.00761683	0.000873717	0.000642471	0.00108847	0.000933354	0.00114369	0.0789637	0.895246
ARPC1B;310;	0.000168102	0.00125987	0.000487714	0.00144248	1.46498e-05	0.996506	2.16176e-05	4.62484e-05	8.55796e-06	1.4502e-05	2.98177e-05
ARPC1B;311;	0.00113301	0.00815547	0.00770643	0.0655416	0.000230718	0.914308	0.000882315	0.0010936	0.000219169	0.000366167	0.000363129
POLR1C;4;	4.77896e-08	4.77593e-08	6.7417e-07	6.58492e-07	7.78146e-07	1.11027e-07	0.99984	1.02924e-06	0.000149822	6.23525e-06	2.43505e-07
TRIM24;654;	0.00422145	0.000738924	0.00235965	0.0003892	0.429568	0.000300407	0.00987892	0.0553887	0.444255	0.0389379	0.013962
TRIM24;660;	0.00579961	0.000109725	0.00110248	1.85772e-05	0.986738	7.72784e-05	0.000120554	0.00221221	0.00243215	0.000226935	0.00116241
TRIM24;663;	0.773273	0.00175125	0.00398337	9.60314e-05	0.204248	0.000760157	0.000175847	0.00494993	0.00142006	0.000522546	0.00882033
TRIM24;664;	0.773273	0.00175125	0.00398337	9.60314e-05	0.204248	0.000760157	0.000175847	0.00494993	0.00142006	0.000522546	0.00882033
TRIM24;667;	0.00579961	0.000109725	0.00110248	1.85772e-05	0.986738	7.72784e-05	0.000120554	0.00221221	0.00243215	0.000226935	0.00116241
PKP2;70;	0.300991	0.193186	0.00594911	0.00363046	0.00172932	0.463354	0.000244367	0.000788569	0.000310273	0.000616876	0.0292009
PKP2;71;	0.215557	0.168112	0.00647269	0.00434946	0.00175005	0.571372	0.000280419	0.000790543	0.000340194	0.000672443	0.0303037
PKP2;151;	0.786677	0.0137042	0.000573065	0.000220283	0.00398891	0.00104245	8.28038e-05	0.000732764	0.000285269	0.000677336	0.192016
PKP2;154;	0.45921	0.0448401	0.000724325	0.000605814	0.00362621	0.00191605	0.000153234	0.00114038	0.000423041	0.00158312	0.485778
PKP2;155;	0.0706647	0.771529	0.000535488	0.00403329	0.0011205	0.00324916	0.00024689	0.0018143	0.000349899	0.0040068	0.14245
PKP2;169;	0.0333108	0.959802	0.000108426	0.000524504	0.000164338	0.000745217	2.90178e-05	0.000519643	4.04566e-05	0.000337088	0.00441851
PKP2;251;	0.0372721	0.892491	0.000441216	0.00446222	0.000514036	0.00558237	0.000149699	0.000720674	0.000171738	0.00151463	0.0566807
TWISTNB;299;	3.01064e-06	0.00060402	1.76595e-06	0.999327	4.70975e-07	2.46247e-05	4.12007e-06	1.75893e-05	7.55826e-07	1.42588e-05	2.40169e-06
TWISTNB;300;	2.58817e-06	0.000505546	1.5302e-06	0.999434	4.10968e-07	2.10566e-05	3.66646e-06	1.52625e-05	6.66324e-07	1.27366e-05	2.10768e-06
TWISTNB;304;	4.46622e-05	0.00391453	5.184e-05	0.994579	8.04808e-06	0.000696963	7.75972e-05	0.00047946	1.25728e-05	0.000115736	1.99848e-05
TWISTNB;316;	0.00710759	0.0673756	0.0419444	0.410215	0.0022163	0.144794	0.0156392	0.300425	0.00292476	0.00607927	0.0012781
SPTBN1;2345;	2.03004e-06	3.29971e-06	2.89639e-06	2.73514e-05	1.82692e-05	1.21163e-06	0.00907347	6.4555e-05	0.00182573	0.98894	4.16369e-05
SPTBN1;2351;	2.03004e-06	3.29971e-06	2.89639e-06	2.73514e-05	1.82692e-05	1.21163e-06	0.00907347	6.4555e-05	0.00182573	0.98894	4.16369e-05
SPTBN1;2353;	2.03004e-06	3.29971e-06	2.89639e-06	2.73514e-05	1.82692e-05	1.21163e-06	0.00907347	6.4555e-05	0.00182573	0.98894	4.16369e-05
SPTBN1;2354;	3.09968e-06	4.11189e-06	3.70828e-06	2.37769e-05	3.36406e-05	1.49114e-06	0.00468827	6.15437e-05	0.00334662	0.991736	9.80108e-05
SPTBN1;2327;	0.000232334	9.23515e-05	0.000264445	0.000180244	0.0123034	6.43602e-05	0.0165383	0.000597422	0.866288	0.0707909	0.0326486
SPTBN1;2332;	0.000320863	0.000122038	0.000326419	0.000217097	0.0169673	8.08006e-05	0.0161706	0.000760001	0.829071	0.0852256	0.0507379
SAFB2;832;	4.73948e-06	9.41852e-05	1.008e-05	0.99965	1.96979e-06	0.000103657	5.54434e-05	1.80312e-05	5.23056e-06	4.78848e-05	9.21838e-06
UBE4B;803;	7.51166e-05	7.75123e-06	0.00113942	8.44788e-06	0.484305	2.44678e-05	0.000975147	0.00013236	0.512949	0.000125243	0.000258131
UBE4B;76;	0.000698976	0.995279	2.29961e-05	0.00241825	2.31443e-05	0.000224623	2.03051e-05	0.000207849	1.44788e-05	0.00036586	0.000724497
UBE4B;79;	0.00294511	0.97731	0.000451226	0.00461953	7.44312e-05	0.0065112	6.43001e-05	0.00771909	3.54297e-05	0.000160991	0.000108611
UBE4B;83;	0.000698976	0.995279	2.29961e-05	0.00241825	2.31443e-05	0.000224623	2.03051e-05	0.000207849	1.44788e-05	0.00036586	0.000724497
UBE4B;84;	4.63465e-05	0.00112452	3.06825e-05	0.953409	2.84956e-05	9.30549e-05	0.00133033	0.000611967	0.000133648	0.0428952	0.000296944
UBE4B;86;	0.000698976	0.995279	2.29961e-05	0.00241825	2.31443e-05	0.000224623	2.03051e-05	0.000207849	1.44788e-05	0.00036586	0.000724497
UBE4B;87;	0.000698976	0.995279	2.29961e-05	0.00241825	2.31443e-05	0.000224623	2.03051e-05	0.000207849	1.44788e-05	0.00036586	0.000724497
UBE4B;88;	0.00814916	0.919589	0.000341516	0.0265937	0.000357312	0.00411265	0.000296026	0.00100577	0.000223879	0.00440988	0.0349213
UBE4B;90;	7.9911e-05	0.0009869	9.81447e-05	0.793173	8.66562e-05	0.000188669	0.0176325	0.00220613	0.00070749	0.184376	0.000464214
UBE4B;92;	0.000698976	0.995279	2.29961e-05	0.00241825	2.31443e-05	0.000224623	2.03051e-05	0.000207849	1.44788e-05	0.00036586	0.000724497
UBE4B;101;	0.00814916	0.919589	0.000341516	0.0265937	0.000357312	0.00411265	0.000296026	0.00100577	0.000223879	0.00440988	0.0349213
PABPN1;90;	0.000252354	1.28262e-05	0.000154134	4.56467e-06	0.99258	1.04096e-05	8.22917e-05	0.000303607	0.00598614	0.000134473	0.000479009
PABPN1;95;	0.000181511	9.40597e-06	0.000101135	3.60437e-06	0.992575	7.98863e-06	6.66202e-05	0.000130791	0.00600233	0.000122095	0.000799642
DDX20;703;	0.00192047	2.75086e-05	0.000218164	4.93545e-06	0.994576	2.2259e-05	2.98707e-05	0.000137927	0.000773884	7.16249e-05	0.00221688
SFRS2;212;	6.44471e-05	6.19391e-05	0.000111719	0.000243469	0.00123965	2.6724e-05	0.154158	0.00466732	0.286269	0.552523	0.000634768
SFRS2;220;	6.44471e-05	6.19391e-05	0.000111719	0.000243469	0.00123965	2.6724e-05	0.154158	0.00466732	0.286269	0.552523	0.000634768
SFRS2;221;	6.44471e-05	6.19391e-05	0.000111719	0.000243469	0.00123965	2.6724e-05	0.154158	0.00466732	0.286269	0.552523	0.000634768
SFRS2;26;	5.89949e-05	1.55106e-06	0.00199742	6.97453e-07	0.997594	1.00431e-05	1.07274e-05	1.20596e-05	0.000286416	3.19193e-06	2.52835e-05
HMGA2;101;	7.52032e-07	1.56253e-05	1.07757e-06	0.9999	4.14638e-07	5.80487e-06	2.22348e-05	4.76462e-06	1.60413e-06	4.49812e-05	2.82072e-06
HMGA2;102;	7.52032e-07	1.56253e-05	1.07757e-06	0.9999	4.14638e-07	5.80487e-06	2.22348e-05	4.76462e-06	1.60413e-06	4.49812e-05	2.82072e-06
HMGA2;105;	7.52032e-07	1.56253e-05	1.07757e-06	0.9999	4.14638e-07	5.80487e-06	2.22348e-05	4.76462e-06	1.60413e-06	4.49812e-05	2.82072e-06
BCLAF1;531;	2.5363e-07	1.53423e-05	1.65235e-07	0.999972	7.39326e-08	1.37752e-06	1.30637e-06	1.09356e-06	1.83445e-07	7.71721e-06	7.78422e-07
BCLAF1;287;	2.97966e-05	2.63289e-05	0.000812167	0.000213465	0.000436295	6.86654e-05	0.974066	0.00266432	0.0207965	0.000840967	4.56729e-05
BCLAF1;525;	2.56527e-07	1.41917e-05	1.73899e-07	0.999972	7.84963e-08	1.40003e-06	1.48382e-06	1.12348e-06	2.01339e-07	8.59059e-06	8.27383e-07
CTAGE5;536;	1.84301e-08	7.91175e-09	8.79324e-08	2.55311e-08	1.98277e-06	9.68991e-09	8.1367e-05	2.25248e-07	0.999913	3.48414e-06	2.396e-07
CTAGE5;594;	3.85905e-08	1.70947e-08	1.6427e-07	5.42047e-08	3.87407e-06	1.90938e-08	0.000155366	5.27681e-07	0.99983	9.23023e-06	5.07636e-07
BCL7C;114;	7.2921e-06	4.9497e-06	5.62891e-05	2.43168e-05	0.000280534	5.88566e-06	0.604346	0.000589683	0.393245	0.0014118	2.82215e-05
BCL7C;122;	7.2921e-06	4.9497e-06	5.62891e-05	2.43168e-05	0.000280534	5.88566e-06	0.604346	0.000589683	0.393245	0.0014118	2.82215e-05
BCL7C;126;	7.2921e-06	4.9497e-06	5.62891e-05	2.43168e-05	0.000280534	5.88566e-06	0.604346	0.000589683	0.393245	0.0014118	2.82215e-05
PPIG;687;	1.64897e-06	5.69739e-05	1.36515e-06	0.999848	5.94204e-07	1.10576e-05	1.27738e-05	5.3152e-06	1.62981e-06	5.40856e-05	7.01664e-06
PPIG;690;	1.34082e-06	0.0001216	7.07626e-07	0.999838	2.92107e-07	8.05124e-06	3.29892e-06	3.82106e-06	5.82296e-07	1.91024e-05	3.44296e-06
PPIG;397;	1.49217e-07	6.97455e-06	1.15218e-07	0.999984	5.016e-08	8.83082e-07	1.1155e-06	7.02265e-07	1.37155e-07	5.51396e-06	4.89902e-07
PPIG;744;	3.13226e-05	0.000321817	6.31884e-05	0.984011	3.25893e-05	0.000168263	0.00669545	0.000322223	0.000226965	0.00795103	0.000176652
PPIG;745;	3.25046e-05	0.000337103	6.28536e-05	0.983303	3.35396e-05	0.000169091	0.00653006	0.000320312	0.000232134	0.00878695	0.000192946
PPIG;716;	5.7565e-06	0.000212939	6.88534e-06	0.999572	1.47678e-06	0.000125368	1.91898e-05	1.21096e-05	2.84622e-06	3.1129e-05	1.03322e-05
PPIG;717;	8.12425e-06	0.000118044	1.54841e-05	0.999116	4.9671e-06	8.89649e-05	0.000266504	3.58972e-05	1.89783e-05	0.000294605	3.19902e-05
PPIG;413;	4.85477e-07	1.58251e-05	5.03147e-07	0.999959	1.77959e-07	4.40712e-06	4.27587e-06	1.74408e-06	4.87598e-07	1.17583e-05	1.59386e-06
PPIG;415;	1.22303e-08	5.40404e-07	1.21259e-08	0.999999	4.09915e-09	1.03923e-07	9.89385e-08	6.4186e-08	1.09524e-08	2.90298e-07	2.94885e-08
PPIG;375;	9.19682e-06	0.00114494	4.15572e-06	0.998663	1.53335e-06	6.62873e-05	1.18086e-05	1.68229e-05	2.50524e-06	6.08286e-05	1.93478e-05
PPIG;376;	1.09795e-05	0.00137436	4.85922e-06	0.998399	1.81436e-06	7.77261e-05	1.36902e-05	1.94588e-05	2.94407e-06	7.18928e-05	2.35207e-05
NOL5;502;	4.06222e-06	5.54574e-08	2.87381e-06	1.42936e-08	0.999985	1.14063e-07	1.29189e-07	2.90332e-07	4.40078e-06	1.30325e-07	3.32173e-06
NOL5;509;	1.8121e-05	2.60207e-07	7.91639e-06	6.37163e-08	0.999931	4.21952e-07	5.48248e-07	1.32512e-06	1.91154e-05	6.89648e-07	2.03783e-05
NOSIP;135;	0.026759	7.05356e-05	0.00445549	8.60253e-06	0.967185	0.000162179	3.1193e-05	0.000276476	0.000377768	3.50261e-05	0.000638817
NOSIP;138;	0.026759	7.05356e-05	0.00445549	8.60253e-06	0.967185	0.000162179	3.1193e-05	0.000276476	0.000377768	3.50261e-05	0.000638817
COIL;301;	0.000128492	0.0006855	0.000432089	0.114005	0.000288207	0.000371388	0.761136	0.0122301	0.00468546	0.105629	0.000409507
PELP1;485;	0.985725	0.0127606	9.63286e-05	3.20618e-05	0.000188465	0.000255741	6.64917e-06	0.000278494	1.5603e-05	3.78465e-05	0.000602747
DDX23;16;	0.00379784	0.00258707	0.771625	0.00562709	0.00911667	0.029048	0.0271357	0.137545	0.010866	0.00197162	0.000679976
UTP3;150;	1.76855e-05	2.90011e-05	6.60253e-05	2.97472e-05	2.03911e-05	1.64723e-05	5.56118e-05	0.999708	2.76637e-05	2.70159e-05	2.87519e-06
UTP3;365;	1.01321e-08	5.58966e-07	9.27881e-09	0.999999	3.4443e-09	5.93345e-08	9.40066e-08	1.1985e-07	9.73664e-09	3.51764e-07	1.84632e-08
UTP3;368;	1.01321e-08	5.58966e-07	9.27881e-09	0.999999	3.4443e-09	5.93345e-08	9.40066e-08	1.1985e-07	9.73664e-09	3.51764e-07	1.84632e-08
LUC7L2;18;	0.00514355	0.848177	0.000425512	0.0256232	0.000427502	0.00139558	0.000610989	0.10633	0.000364702	0.00989589	0.00160593
RRP15;8;	1.33678e-05	0.00130058	6.88444e-06	0.99771	3.62834e-06	3.48461e-05	5.7968e-05	0.000284716	8.81626e-06	0.000559264	1.97122e-05
RRP15;11;	6.66338e-06	0.000622482	3.31471e-06	0.998855	1.85288e-06	1.76838e-05	3.06503e-05	0.000100023	4.638e-06	0.000344901	1.25092e-05
RRP15;58;	0.00107026	0.0353223	0.000722899	0.497835	0.000428549	0.0015352	0.00680052	0.412185	0.00112888	0.0421694	0.000802042
SALL4;307;	1.02657e-05	1.23273e-06	0.999797	1.16205e-06	9.08091e-05	6.09759e-05	8.9489e-06	8.6406e-06	1.85033e-05	8.81717e-07	1.76243e-06
SALL4;776;	0.000108433	4.13176e-06	0.00697597	2.34158e-06	0.991166	2.81508e-05	5.13297e-05	4.12476e-05	0.00155214	1.10045e-05	5.90686e-05
SALL4;789;	0.000108433	4.13176e-06	0.00697597	2.34158e-06	0.991166	2.81508e-05	5.13297e-05	4.12476e-05	0.00155214	1.10045e-05	5.90686e-05
SALL4;793;	0.000113803	4.37512e-06	0.00738009	2.50445e-06	0.990631	3.02105e-05	5.51168e-05	4.24597e-05	0.00166493	1.17313e-05	6.42038e-05
SALL4;849;	2.79705e-09	3.64275e-09	1.63803e-08	5.42853e-08	3.80135e-08	3.96906e-09	0.999984	1.16172e-07	1.17721e-05	3.52055e-06	2.03064e-08
SALL4;852;	3.60545e-08	5.54602e-08	2.01905e-07	9.20303e-07	3.81103e-07	5.19249e-08	0.999885	2.93826e-06	6.35775e-05	4.62809e-05	1.85251e-07
SALL4;714;	0.00519056	0.994147	1.66393e-05	4.59121e-05	7.66373e-06	0.000485091	1.45519e-06	2.44481e-05	1.63666e-06	7.10178e-06	7.29238e-05
SALL4;717;	0.00519056	0.994147	1.66393e-05	4.59121e-05	7.66373e-06	0.000485091	1.45519e-06	2.44481e-05	1.63666e-06	7.10178e-06	7.29238e-05
SALL4;719;	0.00519056	0.994147	1.66393e-05	4.59121e-05	7.66373e-06	0.000485091	1.45519e-06	2.44481e-05	1.63666e-06	7.10178e-06	7.29238e-05
HDGFRP3;178;	0.0235571	0.0334101	0.0519459	0.101455	0.0106754	0.617021	0.0161187	0.00359383	0.00918461	0.011904	0.121134
HDGFRP3;179;	0.0235571	0.0334101	0.0519459	0.101455	0.0106754	0.617021	0.0161187	0.00359383	0.00918461	0.011904	0.121134
HDGFRP3;180;	0.0235571	0.0334101	0.0519459	0.101455	0.0106754	0.617021	0.0161187	0.00359383	0.00918461	0.011904	0.121134
DDX41;23;	0.992942	0.000361867	0.000662621	1.10384e-05	0.0048486	0.000175075	1.17248e-05	0.000508708	6.04233e-05	2.89179e-05	0.000389513
DDX41;21;	3.65222e-07	9.97941e-09	2.87847e-06	4.29135e-09	0.999992	3.64385e-08	7.94577e-08	9.67539e-08	3.98871e-06	3.25384e-08	2.72559e-07
ACIN1;240;	0.294467	0.0110537	0.494437	0.000883467	0.0297529	0.0366298	0.00087382	0.128071	0.00192833	0.000649027	0.00125483
ACIN1;243;	0.287882	0.00587137	0.561141	0.000522824	0.0474039	0.021436	0.000701307	0.071384	0.00196773	0.000503453	0.00118662
ACIN1;256;	0.296562	0.00628262	0.543487	0.000553713	0.0477486	0.0219822	0.000733576	0.0788499	0.00203856	0.000532225	0.0012296
ACIN1;825;	0.00822076	0.91937	0.0017603	0.0067649	0.000164154	0.0553703	0.000115435	0.00776111	6.62247e-05	0.000204392	0.000202438
ACIN1;828;	0.00822076	0.91937	0.0017603	0.0067649	0.000164154	0.0553703	0.000115435	0.00776111	6.62247e-05	0.000204392	0.000202438
ACIN1;710;	8.81859e-05	1.79835e-05	0.000149414	1.23427e-06	1.29345e-06	0.999739	1.78428e-07	1.15664e-06	1.90778e-07	1.34023e-07	8.27468e-07
ACIN1;714;	0.360975	0.00187949	0.288762	0.000137541	0.00431684	0.342258	7.50127e-05	0.000401737	0.000173369	5.8257e-05	0.000962897
ACIN1;365;	8.02934e-06	0.999847	5.76074e-07	0.000121735	2.10307e-07	1.38038e-05	2.59459e-07	4.85904e-06	1.3132e-07	1.62752e-06	1.59872e-06
ANP32B;117;	0.00023639	0.000167931	0.0149735	0.00157778	0.00312971	0.00130398	0.912186	0.00186418	0.0617724	0.00223768	0.00055065
DYNC1LI1;510;	0.124089	0.632982	0.00245651	0.000865439	0.000225774	0.237669	4.10348e-05	0.00121669	4.09819e-05	7.87423e-05	0.000334456
DYNC1LI1;516;	0.0510878	0.422303	0.00360756	0.00139834	0.000224345	0.519191	5.6687e-05	0.00171983	4.87423e-05	9.03122e-05	0.000272348
DYNC1LI1;523;	0.130245	0.579252	0.00258286	0.000860299	0.000230558	0.285183	4.11908e-05	0.00113842	4.13472e-05	7.79976e-05	0.000347307
PPME1;243;	0.583955	0.0428983	0.0123389	0.000355261	0.00059861	0.357925	4.74116e-05	0.00140047	6.35386e-05	6.45497e-05	0.000353099
HN1;87;	0.000535875	0.0130937	0.00167767	0.933375	0.000114035	0.0471663	0.000964011	0.00212539	0.000157826	0.000579764	0.000210769
HN1;88;	0.000535875	0.0130937	0.00167767	0.933375	0.000114035	0.0471663	0.000964011	0.00212539	0.000157826	0.000579764	0.000210769
HN1;91;	0.000628687	0.0167578	0.00181872	0.917276	0.000122538	0.0592184	0.000926517	0.00226424	0.000160903	0.00059446	0.000231481
HN1;92;	0.00172743	0.0179543	0.00724314	0.497776	0.000407398	0.467896	0.00241721	0.00183648	0.000494838	0.00120717	0.00103974
HN1;70;	7.63253e-05	0.00156622	0.000263738	0.993843	2.85774e-05	0.00197844	0.000678502	0.00111769	6.42356e-05	0.000336628	4.67134e-05
HN1;71;	7.63253e-05	0.00156622	0.000263738	0.993843	2.85774e-05	0.00197844	0.000678502	0.00111769	6.42356e-05	0.000336628	4.67134e-05
HN1;79;	7.63253e-05	0.00156622	0.000263738	0.993843	2.85774e-05	0.00197844	0.000678502	0.00111769	6.42356e-05	0.000336628	4.67134e-05
HN1;80;	7.63253e-05	0.00156622	0.000263738	0.993843	2.85774e-05	0.00197844	0.000678502	0.00111769	6.42356e-05	0.000336628	4.67134e-05
HN1;28;	0.00161849	0.0311377	0.00312029	0.401036	0.000606839	0.00714188	0.00824474	0.537608	0.00122148	0.00774057	0.000524728
HN1;31;	0.00109143	0.0125678	0.00308135	0.347743	0.00069746	0.00447561	0.0221318	0.592685	0.00210632	0.012895	0.000525418
ANK2;1732;	0.000666087	0.000762442	0.00017399	0.000625768	0.00270663	8.16712e-05	0.00369672	0.0217411	0.0112978	0.951587	0.00666108
ANK2;1733;	0.000666087	0.000762442	0.00017399	0.000625768	0.00270663	8.16712e-05	0.00369672	0.0217411	0.0112978	0.951587	0.00666108
ANK2;1736;	0.000666087	0.000762442	0.00017399	0.000625768	0.00270663	8.16712e-05	0.00369672	0.0217411	0.0112978	0.951587	0.00666108
ANK2;890;	0.00285525	0.00200964	0.767856	0.0101806	0.00645375	0.163525	0.0299237	0.00451457	0.0091939	0.0017211	0.00176689
ANK2;898;	0.00285525	0.00200964	0.767856	0.0101806	0.00645375	0.163525	0.0299237	0.00451457	0.0091939	0.0017211	0.00176689
PDLIM5;360;	0.000625126	0.00041838	0.00069618	0.000682389	0.0134028	0.00013825	0.0604581	0.0924285	0.452131	0.376034	0.00298501
RAD23B;160;	0.00102922	0.0175948	0.000522935	0.000621496	1.95878e-05	0.980021	1.15654e-05	0.00012897	6.79658e-06	1.32227e-05	3.05175e-05
RAD23B;166;	0.00226623	0.0772764	0.00128883	0.00361729	5.63182e-05	0.91473	4.48451e-05	0.000552564	2.31452e-05	5.27769e-05	9.12401e-05
RAD23B;171;	0.00226623	0.0772764	0.00128883	0.00361729	5.63182e-05	0.91473	4.48451e-05	0.000552564	2.31452e-05	5.27769e-05	9.12401e-05
RAD23B;172;	0.00226623	0.0772764	0.00128883	0.00361729	5.63182e-05	0.91473	4.48451e-05	0.000552564	2.31452e-05	5.27769e-05	9.12401e-05
CAP1;295;	1.09073e-08	2.91981e-09	1.00611e-07	6.93387e-09	3.51304e-06	5.9386e-09	7.87211e-06	6.70228e-08	0.999988	2.76328e-07	9.38188e-08
CAP1;301;	4.26178e-09	1.13168e-09	3.64798e-08	2.60422e-09	1.44765e-06	2.18227e-09	2.82051e-06	2.76906e-08	0.999996	1.13403e-07	3.65025e-08
CAP1;308;	1.08489e-08	3.32718e-09	1.14032e-07	9.11641e-09	2.44788e-06	6.82235e-09	1.89703e-05	9.05729e-08	0.999978	3.48314e-07	8.00686e-08
CAP1;310;	1.9626e-09	6.29099e-10	1.44617e-08	1.71518e-09	4.06715e-07	1.09322e-09	3.13451e-06	1.48737e-08	0.999996	9.86337e-08	2.06288e-08
SMARCAD1;57;	0.999966	1.08545e-05	1.92615e-06	1.20332e-07	5.36982e-06	3.05317e-06	4.93819e-08	7.62559e-07	1.69403e-07	1.75087e-07	1.12129e-05
SMARCAD1;124;	0.987485	0.000198777	0.000908065	9.86812e-06	0.00805216	0.000347965	1.06615e-05	6.58317e-05	6.21156e-05	2.22444e-05	0.00283685
SMARCAD1;127;	0.985515	0.000213474	0.00102843	1.08623e-05	0.00950533	0.000380649	1.19889e-05	7.29315e-05	7.07571e-05	2.47783e-05	0.00316598
SMARCAD1;132;	0.983783	0.000225422	0.00113133	1.16901e-05	0.0108008	0.000407658	1.31175e-05	7.88766e-05	7.81975e-05	2.69121e-05	0.00344287
SMARCAD1;79;	0.999982	4.68669e-06	2.19695e-06	5.80251e-08	1.5428e-06	6.73449e-06	1.92863e-08	2.16617e-07	5.39841e-08	4.39582e-08	2.14992e-06
SMARCAD1;81;	0.999999	4.3003e-07	1.98389e-07	4.64802e-09	1.30456e-07	5.00711e-07	1.57922e-09	2.40479e-08	4.40794e-09	3.55362e-09	1.21906e-07
SMARCAD1;146;	0.995179	0.00302188	5.39117e-05	1.48587e-05	0.000128533	0.000178991	3.37071e-06	4.8838e-05	8.84464e-06	1.83992e-05	0.00134306
SMARCAD1;152;	0.995179	0.00302188	5.39117e-05	1.48587e-05	0.000128533	0.000178991	3.37071e-06	4.8838e-05	8.84464e-06	1.83992e-05	0.00134306
SMARCAD1;239;	0.803281	0.00118895	0.0287215	0.000114002	0.129838	0.00692332	0.000160794	0.000465936	0.00095866	0.000212617	0.0281356
SMARCAD1;242;	0.803281	0.00118895	0.0287215	0.000114002	0.129838	0.00692332	0.000160794	0.000465936	0.00095866	0.000212617	0.0281356
SMARCAD1;246;	0.792612	0.00114581	0.0342196	0.000111813	0.139238	0.00729307	0.000161708	0.000477986	0.000965932	0.000203904	0.0235703
HMGCS1;486;	1.27593e-07	1.21835e-07	7.21052e-07	1.11076e-06	2.91179e-06	1.35896e-07	0.996444	4.10237e-06	0.00341669	0.00012934	1.12731e-06
HMGCS1;495;	1.27593e-07	1.21835e-07	7.21052e-07	1.11076e-06	2.91179e-06	1.35896e-07	0.996444	4.10237e-06	0.00341669	0.00012934	1.12731e-06
HCA90;121;	1.91086e-08	7.96929e-09	1.52778e-07	2.84931e-08	2.16082e-06	1.30744e-08	0.000187625	2.45248e-07	0.999808	1.77541e-06	1.67111e-07
HCA90;125;	1.91086e-08	7.96929e-09	1.52778e-07	2.84931e-08	2.16082e-06	1.30744e-08	0.000187625	2.45248e-07	0.999808	1.77541e-06	1.67111e-07
HCA90;764;	0.00103115	1.28345e-05	0.00980815	3.16004e-06	0.988463	5.63428e-05	2.44002e-05	0.000151215	0.000366063	1.19877e-05	7.20115e-05
HCA90;774;	0.000165635	3.12657e-06	0.00466306	1.07502e-06	0.994835	1.81336e-05	1.21007e-05	3.15842e-05	0.000238056	4.34063e-06	2.7979e-05
RPLP2;79;	0.999996	1.35767e-06	2.9491e-07	1.41193e-08	6.21887e-07	4.57591e-07	5.71428e-09	1.03299e-07	1.89337e-08	1.8137e-08	8.32844e-07
RPLP2;86;	0.999995	1.82675e-06	3.49437e-07	1.81825e-08	6.80561e-07	6.29122e-07	6.88741e-09	1.12571e-07	2.21384e-08	2.20183e-08	1.13559e-06
RSL1D1;421;	1.98907e-05	7.10865e-05	4.23171e-05	0.00381097	7.35317e-05	2.98503e-05	0.365253	0.000841979	0.00261115	0.627055	0.000191615
MAP1B;1376;	9.00034e-06	7.30337e-05	4.15579e-06	0.00137808	1.06834e-05	6.55247e-06	0.000346766	9.37491e-05	7.38391e-05	0.997777	0.000226764
MAP1B;1252;	1.22087e-05	7.37419e-07	7.06361e-05	4.36851e-07	0.996727	1.49193e-06	1.90332e-05	2.28009e-05	0.00312312	6.81844e-06	1.52166e-05
MAP1B;1254;	3.79712e-05	2.82032e-06	0.000213871	1.86311e-06	0.975476	5.16801e-06	0.000103711	0.00010915	0.0239596	3.46506e-05	5.55385e-05
MAP1B;1258;	7.22168e-05	1.27264e-05	0.000439849	1.40534e-05	0.0480203	1.69643e-05	0.00245434	0.00153617	0.946841	0.00045658	0.000136177
MAP1B;1618;	4.04089e-05	4.79334e-06	0.000351254	4.89413e-06	0.197684	9.64135e-06	0.000683109	0.00018359	0.800817	0.000114209	0.00010746
MAP1B;1620;	4.04089e-05	4.79334e-06	0.000351254	4.89413e-06	0.197684	9.64135e-06	0.000683109	0.00018359	0.800817	0.000114209	0.00010746
MAP1B;1625;	4.04089e-05	4.79334e-06	0.000351254	4.89413e-06	0.197684	9.64135e-06	0.000683109	0.00018359	0.800817	0.000114209	0.00010746
MAP1B;1793;	0.0193029	0.839827	0.000455918	0.014703	0.000950592	0.00237331	0.000526123	0.00349678	0.000546298	0.0167886	0.10103
MAP1B;1797;	0.0419103	0.127825	0.0547496	0.0130311	0.00316268	0.111076	0.00181069	0.642656	0.00119855	0.00161518	0.000965226
MAP1B;1803;	0.000940363	0.997834	1.48149e-05	0.000396429	1.78044e-05	0.000100687	8.7944e-06	0.000235962	8.13143e-06	0.000145927	0.0002967
MAP1B;992;	0.000339759	0.998169	1.01746e-05	0.000911795	8.70614e-06	0.000128292	6.89512e-06	6.77467e-05	4.94761e-06	9.66911e-05	0.000256164
MAP1B;995;	0.000415213	0.997738	1.25176e-05	0.00111383	1.07279e-05	0.000161492	8.45559e-06	7.69867e-05	6.08798e-06	0.00011765	0.000339041
MAP1B;936;	3.22564e-06	5.09439e-06	2.98382e-05	0.000165434	2.36606e-05	1.14882e-05	0.997865	3.73532e-05	0.00122389	0.000610927	2.40228e-05
MAP1B;2209;	0.00206327	0.000208603	0.00281237	9.84741e-05	0.824259	0.000157375	0.00274599	0.0295201	0.133584	0.00278817	0.00176256
MAP1B;2211;	0.00206327	0.000208603	0.00281237	9.84741e-05	0.824259	0.000157375	0.00274599	0.0295201	0.133584	0.00278817	0.00176256
MAP1B;1438;	3.43173e-07	1.0118e-08	1.61761e-06	4.53903e-09	0.999992	3.28422e-08	8.62295e-08	7.54165e-08	5.31626e-06	4.13761e-08	5.08947e-07
MAP1B;1076;	0.000922096	0.00203446	0.000200008	0.000748702	0.000924853	0.000112415	0.00101858	0.968806	0.00137619	0.0231118	0.000744548
MAP1B;1653;	1.90318e-05	5.76855e-07	0.000351969	2.85233e-07	0.999403	3.17175e-06	5.2145e-06	4.02178e-06	0.000195582	1.63654e-06	1.58417e-05
MAP1B;2271;	1.17343e-05	1.29205e-05	3.21868e-05	0.000113197	0.000200391	9.4555e-06	0.800316	0.00021232	0.0960135	0.102828	0.000250641
MAP1B;1400;	0.134066	0.431445	0.0316766	0.00619023	0.0017779	0.337379	0.000494071	0.0550058	0.000418731	0.000634635	0.000911244
MAP1B;1406;	0.0672761	0.431323	0.021268	0.00693003	0.00105309	0.439818	0.000387369	0.0305172	0.000287984	0.00048089	0.000659194
MAP1B;1631;	1.88622e-05	1.01781e-05	8.77637e-05	2.93206e-05	0.00103664	8.83623e-06	0.0531697	0.00199407	0.940473	0.00310215	6.90413e-05
MAP1B;1276;	0.00106962	6.3746e-05	0.000362839	2.41768e-05	0.95517	4.49916e-05	0.000348087	0.000462222	0.0233582	0.00105802	0.018038
MAP1B;1322;	0.000573896	1.93527e-05	0.000220231	6.64417e-06	0.9842	2.40629e-05	6.8701e-05	6.33769e-05	0.00307333	0.000127704	0.0116226
MAP1B;1324;	0.000573896	1.93527e-05	0.000220231	6.64417e-06	0.9842	2.40629e-05	6.8701e-05	6.33769e-05	0.00307333	0.000127704	0.0116226
MAP1B;1326;	0.000573896	1.93527e-05	0.000220231	6.64417e-06	0.9842	2.40629e-05	6.8701e-05	6.33769e-05	0.00307333	0.000127704	0.0116226
MAP1B;1330;	0.000573896	1.93527e-05	0.000220231	6.64417e-06	0.9842	2.40629e-05	6.8701e-05	6.33769e-05	0.00307333	0.000127704	0.0116226
MAP1B;1339;	0.000573896	1.93527e-05	0.000220231	6.64417e-06	0.9842	2.40629e-05	6.8701e-05	6.33769e-05	0.00307333	0.000127704	0.0116226
MAP1B;1396;	0.0331654	0.46745	0.00073531	0.013206	0.00147091	0.00473407	0.000603373	0.00210211	0.00070313	0.0121587	0.463671
LIMA1;368;	0.000437535	0.00416359	0.00032597	0.0262859	0.000409585	0.000315073	0.00977125	0.832831	0.00180881	0.123107	0.000543957
LIMA1;369;	0.000282595	0.00299376	0.00032685	0.236912	0.000342374	0.000400082	0.0518071	0.0553332	0.00280005	0.647992	0.000810372
LIMA1;371;	4.37191e-05	0.000256848	5.88603e-05	0.0109688	9.33879e-05	5.0111e-05	0.0403496	0.0066907	0.00144481	0.939833	0.000209797
LIMA1;373;	4.37191e-05	0.000256848	5.88603e-05	0.0109688	9.33879e-05	5.0111e-05	0.0403496	0.0066907	0.00144481	0.939833	0.000209797
LIMA1;374;	4.96494e-05	0.000256459	8.09455e-05	0.0123385	0.000122671	6.3251e-05	0.104768	0.00705419	0.00232655	0.872695	0.000244149
LIMA1;362;	0.000831373	0.00829468	0.000260711	0.00893975	0.00049318	0.000273342	0.00256477	0.897963	0.00117191	0.0783737	0.000833768
LIMA1;350;	6.91128e-05	4.53391e-06	0.000312108	3.3785e-06	0.979068	1.26309e-05	0.000128629	2.94778e-05	0.0197314	5.15573e-05	0.000589068
EIF4A3;10;	2.53503e-07	6.5017e-06	3.38752e-07	0.999951	1.4185e-07	1.39943e-06	9.55195e-06	3.93075e-06	5.9588e-07	2.52789e-05	6.87093e-07
EIF4A3;12;	2.55313e-08	3.9291e-08	1.34235e-07	8.42061e-07	2.61667e-07	4.3191e-08	0.99991	6.86975e-07	4.50581e-05	4.26707e-05	2.37868e-07
PRKD2;396;	0.807772	0.001903	0.00113545	8.18289e-05	0.0099018	0.00125181	5.73793e-05	0.000234025	0.000271373	0.000212564	0.177179
PRKD2;212;	0.000337436	1.99915e-05	1.71246e-05	3.62775e-06	0.00022539	1.71831e-05	4.15105e-06	4.00121e-06	2.12891e-05	1.79756e-05	0.999332
PRKD2;214;	0.000337436	1.99915e-05	1.71246e-05	3.62775e-06	0.00022539	1.71831e-05	4.15105e-06	4.00121e-06	2.12891e-05	1.79756e-05	0.999332
PRKD2;197;	0.00264724	0.00034517	0.114515	0.000527836	0.454357	0.00309921	0.0249894	0.00143619	0.383445	0.00231805	0.0123195
PRKD2;198;	0.00261715	0.000339901	0.132185	0.000520585	0.450833	0.00318199	0.0250562	0.00147831	0.370752	0.00219138	0.010845
PRKD2;200;	0.00359965	0.000502141	0.150709	0.000807519	0.411685	0.00491158	0.0330084	0.0017871	0.371792	0.00314217	0.0180554
PRKD2;203;	0.00356875	0.000496806	0.158553	0.000799382	0.409933	0.00494133	0.0329267	0.00179841	0.366811	0.00306219	0.0171096
PRKD2;206;	0.00466789	0.000695361	0.165189	0.00116519	0.380045	0.00701731	0.0408799	0.00209648	0.366591	0.00422253	0.0274308
WDR3;240;	4.12117e-07	8.63542e-08	5.86352e-06	1.63875e-07	0.000257284	2.08848e-07	0.000104183	2.68446e-06	0.999623	4.02929e-06	1.8586e-06
WDR3;241;	4.12117e-07	8.63542e-08	5.86352e-06	1.63875e-07	0.000257284	2.08848e-07	0.000104183	2.68446e-06	0.999623	4.02929e-06	1.8586e-06
MAGED2;244;	1.79866e-06	5.31519e-07	4.00106e-05	1.5011e-06	0.000356396	1.51933e-06	0.00299769	1.78025e-05	0.996549	2.64353e-05	7.01862e-06
MAGED2;247;	1.00864e-05	3.72263e-06	0.000268175	1.27781e-05	0.00106022	1.05682e-05	0.0498726	0.000184829	0.948369	0.00017936	2.89481e-05
MAGED2;157;	0.000310129	9.47767e-05	0.00104828	4.65923e-05	0.00174831	7.14681e-05	0.000385616	0.995038	0.00100435	0.000206204	4.59764e-05
MAGED2;162;	0.00139906	0.000309499	0.00780546	0.00014697	0.010617	0.000337231	0.0013505	0.97309	0.00421235	0.000558005	0.000174028
MAGED2;264;	0.00788111	0.00213725	0.00104355	0.000162696	0.00227484	0.000311391	0.000182406	0.984808	0.000434067	0.000490199	0.000274488
MAGED2;265;	0.00788111	0.00213725	0.00104355	0.000162696	0.00227484	0.000311391	0.000182406	0.984808	0.000434067	0.000490199	0.000274488
C20orf77;164;	0.00506767	0.00015934	0.000838629	4.36867e-05	0.105022	0.000225169	0.000172328	0.000134154	0.00240635	0.000421527	0.885509
C20orf77;166;	0.00506767	0.00015934	0.000838629	4.36867e-05	0.105022	0.000225169	0.000172328	0.000134154	0.00240635	0.000421527	0.885509
RRAGD;96;	0.989351	0.00728676	8.71739e-05	3.08312e-05	0.000205923	0.000310054	6.36313e-06	9.43706e-05	1.59878e-05	3.76839e-05	0.00257392
LMNB2;37;	3.7047e-09	1.329e-09	3.2382e-08	4.06339e-09	5.95599e-07	2.3258e-09	1.4656e-05	4.26549e-08	0.999984	2.12552e-07	2.88105e-08
LMNB2;424;	0.969043	0.0297518	7.55056e-05	2.92687e-05	6.3204e-05	0.000605482	3.41099e-06	7.77903e-05	6.2925e-06	1.51711e-05	0.000328843
LMNB2;391;	6.0087e-07	2.17435e-07	9.91824e-06	7.26055e-07	8.11175e-05	5.11092e-07	0.00353854	8.50038e-06	0.99634	1.76049e-05	2.71342e-06
LMNB2;393;	3.11004e-07	9.8697e-08	5.08274e-06	2.88678e-07	5.8263e-05	2.38254e-07	0.000799239	3.49478e-06	0.999124	7.04684e-06	1.45756e-06
LMNB2;395;	3.64524e-06	2.03604e-06	5.65181e-05	1.10678e-05	0.000187824	4.36083e-06	0.600813	9.20152e-05	0.398568	0.000245704	1.57872e-05
LMNB2;396;	3.14326e-08	1.19255e-08	3.15419e-07	4.06905e-08	4.22799e-06	2.29069e-08	0.000207374	3.41658e-07	0.999786	1.77381e-06	2.4423e-07
BET1L;9;	0.339767	0.656408	0.000201219	0.000209195	0.000197119	0.00129394	1.81731e-05	0.000761742	2.89204e-05	0.00011007	0.00100456
PFKP;386;	0.00102224	0.991167	5.02668e-05	0.00509178	2.62459e-05	0.00150143	2.29838e-05	0.000108818	1.46227e-05	0.000173037	0.000821339
KRT13;422;	8.06864e-06	5.8741e-07	0.999867	4.10918e-07	7.38041e-05	3.68656e-05	2.42568e-06	2.29481e-06	6.99675e-06	3.45383e-07	1.27031e-06
KRT13;425;	8.06864e-06	5.8741e-07	0.999867	4.10918e-07	7.38041e-05	3.68656e-05	2.42568e-06	2.29481e-06	6.99675e-06	3.45383e-07	1.27031e-06
KRT13;427;	0.00386291	0.000290792	0.943879	0.000222485	0.0265817	0.0183779	0.000948674	0.000351904	0.00296666	0.000202886	0.0023149
KRT13;453;	0.00167169	0.000397373	0.607942	0.000376194	0.0011637	0.387111	0.000341645	0.000235449	0.000331137	7.53645e-05	0.000354831
ARMCX3;61;	0.0122369	0.028345	0.316715	0.0430135	0.00437269	0.380286	0.0103395	0.197534	0.00341747	0.00261214	0.0011285
PSMF1;153;	0.0593719	0.86293	0.00112621	0.00063943	0.000126285	0.074547	2.61102e-05	0.000950919	2.50751e-05	5.55739e-05	0.000201007
YTHDC2;1089;	0.999226	9.05816e-05	3.74841e-05	1.81313e-06	0.000124877	5.68488e-05	8.85151e-07	7.06207e-06	3.34831e-06	2.80491e-06	0.0004481
YTHDC2;1090;	0.99913	0.000186265	2.92931e-05	2.5019e-06	7.57268e-05	6.86981e-05	9.05134e-07	7.90208e-06	2.94342e-06	3.31463e-06	0.000492308
YTHDC2;1092;	0.999226	9.05816e-05	3.74841e-05	1.81313e-06	0.000124877	5.68488e-05	8.85151e-07	7.06207e-06	3.34831e-06	2.80491e-06	0.0004481
SFRS3;108;	2.08703e-06	8.22167e-08	2.25117e-05	4.16126e-08	0.999889	2.58989e-07	1.1475e-06	1.49004e-06	8.13952e-05	3.72896e-07	1.52252e-06
PDLIM1;123;	0.00161911	0.0001272	0.000698372	6.199e-05	0.813258	0.000102446	0.00101873	0.000613026	0.0731951	0.0030659	0.10624
PDLIM1;130;	0.00161911	0.0001272	0.000698372	6.199e-05	0.813258	0.000102446	0.00101873	0.000613026	0.0731951	0.0030659	0.10624
PDLIM1;133;	0.00161911	0.0001272	0.000698372	6.199e-05	0.813258	0.000102446	0.00101873	0.000613026	0.0731951	0.0030659	0.10624
PDLIM1;90;	1.96513e-06	1.20333e-06	6.64541e-06	4.77913e-06	0.000100015	1.02285e-06	0.0224326	4.83279e-05	0.97559	0.00178866	2.45211e-05
GTPBP1;580;	0.000717206	2.0453e-05	0.00626972	9.78693e-06	0.988891	0.000140402	0.000109758	5.64035e-05	0.00241252	4.56967e-05	0.00132735
GTPBP1;584;	0.000108937	3.38218e-06	0.00136406	1.72491e-06	0.997438	2.03177e-05	2.68489e-05	1.46025e-05	0.000852494	9.48822e-06	0.000160618
GTPBP1;25;	0.000116317	1.37578e-05	0.00110622	1.29874e-05	0.361601	2.63826e-05	0.00154633	0.000850696	0.634274	0.000262043	0.000189492
BAT2;1085;	0.000381131	0.0516574	0.000305977	0.93633	5.52155e-05	0.00324351	0.00037108	0.00672158	7.48405e-05	0.00073894	0.000119939
BAT2;1089;	3.47217e-06	0.000127905	6.16823e-06	0.999711	9.3388e-07	0.000100108	1.49229e-05	1.50916e-05	1.84166e-06	1.53163e-05	3.4149e-06
BAT2;1092;	1.05788e-05	0.000664329	1.39203e-05	0.998893	2.58819e-06	0.000122379	3.95873e-05	0.000183563	5.07984e-06	5.85467e-05	6.4068e-06
BAT2;1435;	2.34359e-06	7.97726e-06	2.75107e-06	0.000115233	8.47281e-06	1.6832e-06	0.00303138	0.00026746	0.000224235	0.99632	1.87992e-05
SFPQ;33;	7.01771e-06	5.12044e-06	2.21542e-05	2.38668e-05	0.000255895	3.92551e-06	0.149998	0.000219262	0.836776	0.0126041	8.49836e-05
NES;51;	3.49991e-07	7.78916e-09	2.22506e-06	2.93731e-09	0.999995	2.79536e-08	4.46866e-08	7.19061e-08	1.8304e-06	2.06409e-08	1.89916e-07
NES;1445;	0.00025933	0.00256576	0.000419564	0.00622182	0.00011368	0.000483332	0.000834745	0.987935	0.000195822	0.000910218	6.06615e-05
NES;1451;	0.00025933	0.00256576	0.000419564	0.00622182	0.00011368	0.000483332	0.000834745	0.987935	0.000195822	0.000910218	6.06615e-05
NES;1452;	0.000246319	0.00172055	0.000659198	0.0129836	0.000200445	0.000545378	0.00435044	0.975901	0.000591311	0.00270257	9.93522e-05
NES;680;	0.0100014	0.273439	0.0154551	0.091366	0.000691519	0.575509	0.00116749	0.030248	0.000429114	0.001037	0.000656815
NES;931;	0.00472554	0.994587	2.18584e-05	3.5489e-05	6.55372e-06	0.000544014	1.27607e-06	5.15022e-05	1.35287e-06	4.73918e-06	2.10621e-05
NES;934;	0.000492124	0.998767	8.45298e-06	0.000287791	7.17783e-06	0.000122675	3.66152e-06	3.67495e-05	3.12867e-06	4.16228e-05	0.000229997
NES;352;	2.93108e-06	3.64718e-06	3.77016e-05	4.35742e-05	3.23297e-05	5.72082e-06	0.996839	0.000427507	0.00229092	0.000310358	6.22086e-06
NES;355;	2.93108e-06	3.64718e-06	3.77016e-05	4.35742e-05	3.23297e-05	5.72082e-06	0.996839	0.000427507	0.00229092	0.000310358	6.22086e-06
NES;358;	2.93108e-06	3.64718e-06	3.77016e-05	4.35742e-05	3.23297e-05	5.72082e-06	0.996839	0.000427507	0.00229092	0.000310358	6.22086e-06
NES;320;	9.03261e-09	2.92569e-09	9.57473e-08	8.16523e-09	1.82722e-06	5.62909e-09	2.18564e-05	1.04704e-07	0.999976	3.27357e-07	5.57083e-08
NES;471;	0.999834	1.97181e-05	1.72816e-05	4.04043e-07	8.41307e-05	9.24167e-06	2.94516e-07	7.09826e-06	1.31883e-06	8.23326e-07	2.52217e-05
NES;831;	0.999977	7.16732e-06	2.21439e-06	7.92769e-08	1.81899e-06	7.45807e-06	2.4766e-08	2.74099e-07	6.86043e-08	6.15774e-08	3.39053e-06
NES;842;	3.80975e-05	0.998573	4.30336e-06	0.00119941	1.15838e-06	0.000136568	1.70404e-06	3.0588e-05	7.62523e-07	7.84523e-06	6.6193e-06
NES;578;	0.000916076	0.998543	1.24085e-05	3.16934e-05	2.72383e-06	0.000450366	7.71967e-07	3.20146e-05	6.87036e-07	2.52229e-06	7.6757e-06
NES;548;	0.00138756	0.994627	4.93073e-05	0.000152049	7.10297e-06	0.00366016	2.6824e-06	8.725e-05	2.04914e-06	6.94881e-06	1.77528e-05
NES;556;	0.00138756	0.994627	4.93073e-05	0.000152049	7.10297e-06	0.00366016	2.6824e-06	8.725e-05	2.04914e-06	6.94881e-06	1.77528e-05
NES;913;	0.00105199	0.00297434	0.000618404	0.000367494	0.000164801	0.000493662	0.000103415	0.99395	7.98331e-05	0.000151431	4.49255e-05
NES;1492;	0.000676719	0.0124852	0.000687513	0.15011	0.000358355	0.00105718	0.00711897	0.804216	0.00104644	0.0218193	0.000424674
NES;311;	1.92452e-06	1.08574e-06	2.19867e-05	6.09164e-06	0.000103953	2.11381e-06	0.38429	3.30143e-05	0.615317	0.000210311	1.30021e-05
CSNK2B;22;	0.008764	0.0929641	0.0377013	0.273986	0.00216772	0.134564	0.0105845	0.430331	0.00242655	0.00529836	0.00121191
DFFA;315;	5.80476e-08	1.96149e-08	7.34241e-07	5.88284e-08	1.00951e-05	4.08958e-08	0.000203817	7.25481e-07	0.999782	1.94312e-06	3.17317e-07
EPPK1;2716;	0.990689	0.00374978	0.00026772	2.69843e-05	0.000109735	0.00455481	4.23478e-06	3.34482e-05	8.28149e-06	1.07872e-05	0.000545517
EPPK1;2718;	0.879403	0.00225254	0.040836	0.00018758	0.0238365	0.0342248	0.000148109	0.000394923	0.000546293	0.000180047	0.0179901
EPPK1;2723;	0.994559	0.0013185	0.000267457	2.04427e-05	0.000251718	0.00156101	5.33658e-06	3.04239e-05	1.36501e-05	1.47375e-05	0.00195733
UNG;64;	0.000122666	5.45481e-06	0.00222589	2.63539e-06	0.994853	1.70512e-05	6.58589e-05	0.000205313	0.0024436	1.84377e-05	3.98467e-05
UNG;67;	0.000927013	6.12712e-05	0.0147211	3.25975e-05	0.950448	0.000150289	0.000945448	0.00548481	0.0267113	0.000243105	0.000274671
CLDN6;201;	3.2028e-06	5.77806e-06	6.05719e-06	1.24375e-06	1.32014e-07	0.999983	6.17974e-08	1.66114e-07	4.14486e-08	4.72441e-08	2.38968e-07
CLDN6;203;	4.24077e-06	8.65592e-06	7.8075e-06	1.94083e-06	1.78238e-07	0.999976	8.87368e-08	2.37048e-07	5.79537e-08	6.85009e-08	3.34157e-07
CLDN6;208;	9.37231e-05	0.000248549	0.000526486	0.000301335	1.15014e-05	0.998755	1.30654e-05	1.67794e-05	6.03398e-06	6.85749e-06	2.0914e-05
RRM2;80;	0.000426702	8.58602e-06	0.000109547	1.84123e-06	0.99851	7.46245e-06	1.57783e-05	0.000102164	0.000514897	2.84879e-05	0.000274727
RPS3;224;	5.66377e-05	0.99953	2.21665e-06	0.00031342	1.45297e-06	3.45186e-05	1.38881e-06	1.65797e-05	8.70981e-07	1.56224e-05	2.70073e-05
DYNC1LI2;194;	7.74811e-06	1.84982e-06	0.000211989	4.52191e-06	0.00225115	6.62075e-06	0.00374148	3.93675e-05	0.993641	6.14041e-05	3.26901e-05
FOSL2;232;	0.000713944	1.32684e-05	0.000853844	4.39878e-06	0.995131	4.75897e-05	3.41808e-05	2.8106e-05	0.000809917	2.8707e-05	0.00233456
BCL2L13;302;	5.95184e-06	1.24846e-06	1.33859e-05	1.53739e-06	0.00308496	1.15441e-06	0.00028027	4.36776e-05	0.996328	0.000179864	6.02641e-05
BCL2L13;305;	2.06441e-05	4.55204e-06	4.05249e-05	5.24747e-06	0.00786063	3.63678e-06	0.000818993	0.000226664	0.990182	0.000678024	0.000158704
ELL2;502;	2.33607e-05	0.999957	3.26743e-07	6.87335e-06	1.87564e-07	7.28982e-06	8.23775e-08	1.18983e-06	6.9376e-08	6.24294e-07	2.98361e-06
ELL2;503;	1.54963e-05	0.999973	2.01654e-07	3.89157e-06	1.1681e-07	4.25681e-06	4.95915e-08	7.9912e-07	4.23438e-08	3.76496e-07	1.70807e-06
CHAF1B;410;	5.75524e-07	2.20669e-08	3.9575e-06	1.15931e-08	0.999967	7.04455e-08	3.05173e-07	2.23537e-07	2.65943e-05	1.17049e-07	9.05163e-07
CHAF1B;428;	9.73067e-06	1.90345e-06	0.000160577	3.82906e-06	0.00490694	6.29657e-06	0.00147434	2.53109e-05	0.993275	6.54385e-05	7.02643e-05
CHAF1B;429;	8.65087e-05	6.78616e-06	0.00135606	6.28089e-06	0.926266	2.63802e-05	0.000400191	7.08625e-05	0.0714108	6.97324e-05	0.000300254
CHAF1B;458;	0.000582176	9.93851e-05	0.0447237	0.000193985	0.146648	0.000708478	0.0315048	0.00104489	0.771795	0.00106221	0.00163747
CHAF1B;464;	3.21949e-05	7.23918e-06	0.00107427	1.74668e-05	0.00867085	3.12077e-05	0.00959144	0.000114133	0.980137	0.000184843	0.000139589
EIF2B5;544;	0.999745	4.8058e-05	8.41613e-05	7.52839e-07	3.79308e-05	5.98109e-05	3.70042e-07	1.48516e-05	1.07946e-06	6.47665e-07	7.05008e-06
BCAR1;446;	0.00251816	0.00960216	0.0494322	0.585285	0.00298691	0.0678679	0.214501	0.0421726	0.0109367	0.0127586	0.00193943
BCAR1;448;	0.00251816	0.00960216	0.0494322	0.585285	0.00298691	0.0678679	0.214501	0.0421726	0.0109367	0.0127586	0.00193943
BCAR1;449;	0.00251816	0.00960216	0.0494322	0.585285	0.00298691	0.0678679	0.214501	0.0421726	0.0109367	0.0127586	0.00193943
BCAR1;452;	0.00251816	0.00960216	0.0494322	0.585285	0.00298691	0.0678679	0.214501	0.0421726	0.0109367	0.0127586	0.00193943
CFL1;3;	3.94235e-05	3.33329e-06	0.000174211	2.73036e-06	0.88437	6.69087e-06	0.000185739	4.78258e-05	0.11487	6.67127e-05	0.000233639
PCBP2;184;	6.28285e-06	8.88219e-06	1.00353e-05	6.48399e-05	7.04733e-05	3.61894e-06	0.0405741	0.000225555	0.0104853	0.948437	0.000113638
MPHOSPH10;163;	0.00041981	0.0390864	0.000101971	0.948416	7.61114e-05	0.000917845	0.00043754	0.000583426	0.000127703	0.0073899	0.00244325
CCDC86;58;	6.44828e-06	3.9672e-07	2.18768e-05	2.48014e-07	0.996974	7.49818e-07	1.0688e-05	6.07525e-06	0.00295114	5.1771e-06	2.29432e-05
CCDC86;66;	0.000390313	3.45225e-06	7.99308e-05	6.04961e-07	0.999292	4.49943e-06	3.72232e-06	2.06313e-05	8.76835e-05	5.48822e-06	0.000111878
CCDC86;69;	5.64488e-05	5.16095e-07	2.82266e-05	1.03205e-07	0.999878	9.65897e-07	7.32472e-07	3.527e-06	1.79202e-05	7.73111e-07	1.23166e-05
CCDC86;18;	7.86375e-05	2.6931e-05	0.000346828	7.98463e-05	0.00633055	5.302e-05	0.0216592	0.000144864	0.964172	0.00331078	0.00379728
CCDC86;21;	0.000389667	0.000191787	0.00098912	0.000703706	0.0124014	0.000268404	0.0987218	0.000687104	0.794419	0.0480748	0.0431532
CCDC86;24;	0.000389667	0.000191787	0.00098912	0.000703706	0.0124014	0.000268404	0.0987218	0.000687104	0.794419	0.0480748	0.0431532
CCDC86;26;	0.000389667	0.000191787	0.00098912	0.000703706	0.0124014	0.000268404	0.0987218	0.000687104	0.794419	0.0480748	0.0431532
CCDC86;80;	0.00317536	4.70716e-05	0.000939452	8.13757e-06	0.993267	4.56912e-05	5.40249e-05	0.00093464	0.00105352	7.5454e-05	0.000399812
CCDC86;91;	0.00317536	4.70716e-05	0.000939452	8.13757e-06	0.993267	4.56912e-05	5.40249e-05	0.00093464	0.00105352	7.5454e-05	0.000399812
CCDC86;102;	0.0952183	0.00144521	0.0076903	0.000161332	0.849256	0.000737029	0.000617096	0.0307637	0.00696544	0.0013831	0.00576256
CCDC86;110;	0.351415	0.00385321	0.00524209	0.00029338	0.568497	0.00111448	0.00070839	0.018133	0.00707643	0.00309388	0.0405736
CCDC86;113;	0.110577	0.000917284	0.0103952	9.63556e-05	0.855313	0.000709781	0.00034234	0.0145117	0.00358608	0.000569815	0.00298136
CCDC86;217;	0.110569	0.0141549	0.634186	0.00122924	0.00618266	0.190972	0.000580687	0.040359	0.000766976	0.000355837	0.00064385
CCDC86;218;	0.00391478	0.00016804	0.950148	2.48562e-05	0.000368364	0.0451233	1.73935e-05	0.000166798	2.86135e-05	7.68097e-06	3.17269e-05
PSMD2;16;	2.79597e-05	1.14832e-06	2.95099e-05	4.22219e-07	0.999211	1.31403e-06	8.28376e-06	2.6744e-05	0.000650217	8.59725e-06	3.43504e-05
PSMD2;361;	0.99436	0.000631518	0.000338992	6.9203e-06	5.24187e-05	0.00452823	1.48943e-06	1.69855e-05	2.98925e-06	2.53851e-06	5.81488e-05
PSMD2;363;	0.99244	0.00539149	0.00010695	2.32307e-05	8.89204e-05	0.00105074	3.48932e-06	3.29186e-05	7.20648e-06	1.27125e-05	0.000841977
SFRS9;189;	9.10652e-06	0.00199037	3.33693e-06	0.997826	1.39362e-06	4.30312e-05	1.03224e-05	2.55198e-05	2.26133e-06	7.33977e-05	1.54555e-05
SFRS5;227;	0.00183562	0.00795142	0.000247143	0.00880286	0.000934844	0.000612846	0.00155678	0.000954709	0.0015216	0.130053	0.845529
SFRS5;229;	2.03158e-07	9.9179e-08	1.25914e-06	4.1858e-07	1.57572e-05	1.46234e-07	0.00346175	2.20411e-06	0.996478	3.79641e-05	2.66906e-06
SFRS5;231;	0.000287543	0.0001833	0.00044344	0.000684388	0.00683652	0.000146168	0.0917846	0.00083358	0.612342	0.24637	0.0400881
SFRS5;233;	2.03158e-07	9.9179e-08	1.25914e-06	4.1858e-07	1.57572e-05	1.46234e-07	0.00346175	2.20411e-06	0.996478	3.79641e-05	2.66906e-06
SFRS6;81;	3.19817e-06	5.25763e-05	8.85415e-06	0.99959	1.98042e-06	3.92605e-05	0.000155789	4.58579e-05	7.82018e-06	8.94941e-05	5.42858e-06
SFRS6;301;	0.000104792	6.55373e-06	0.000156187	3.02085e-06	0.989005	7.02501e-06	8.84676e-05	0.000254124	0.0101421	7.8596e-05	0.000154393
SFRS6;303;	4.96833e-06	2.3e-07	1.12437e-05	1.04396e-07	0.999634	3.54368e-07	2.87156e-06	5.52147e-06	0.000332574	1.88157e-06	6.58059e-06
SFRS6;297;	8.13185e-05	5.09495e-06	0.000388797	2.69937e-06	0.989882	8.58143e-06	9.86753e-05	0.000277194	0.00915341	4.0635e-05	6.13434e-05
SFRS6;299;	0.000106547	7.63215e-06	0.000603392	4.50233e-06	0.975828	1.31737e-05	0.000200893	0.000450687	0.022622	7.11978e-05	9.14543e-05
ADRBK1;670;	0.991055	0.00221512	0.00018953	2.76259e-05	0.000323107	0.000843347	7.10846e-06	4.50464e-05	1.91314e-05	2.67166e-05	0.00524807
TGOLN2;71;	0.967561	0.000189228	0.00254643	1.04439e-05	0.0281376	0.000352912	1.55686e-05	0.00018677	0.000103568	2.55112e-05	0.000870937
DNMT3B;195;	8.38541e-06	9.20756e-06	0.000201079	0.000113249	9.25054e-05	2.45379e-05	0.994352	0.000563679	0.00428237	0.000337548	1.54963e-05
DNMT3B;202;	3.66257e-09	5.88453e-09	2.39051e-08	1.4264e-07	3.44913e-08	7.28303e-09	0.999992	1.26952e-07	4.58449e-06	3.2539e-06	2.45093e-08
DNMT3B;209;	8.38541e-06	9.20756e-06	0.000201079	0.000113249	9.25054e-05	2.45379e-05	0.994352	0.000563679	0.00428237	0.000337548	1.54963e-05
DNMT3B;214;	8.38541e-06	9.20756e-06	0.000201079	0.000113249	9.25054e-05	2.45379e-05	0.994352	0.000563679	0.00428237	0.000337548	1.54963e-05
DNMT3B;215;	8.38541e-06	9.20756e-06	0.000201079	0.000113249	9.25054e-05	2.45379e-05	0.994352	0.000563679	0.00428237	0.000337548	1.54963e-05
DNMT3B;98;	8.96423e-05	2.57993e-05	0.000119811	4.06511e-05	0.010951	2.12066e-05	0.00436208	0.000219408	0.967571	0.00912129	0.0074781
DNMT3B;100;	8.23764e-05	7.2503e-05	0.000131075	0.000372742	0.00152174	4.5024e-05	0.118669	0.000552535	0.275768	0.597268	0.00551694
DNMT3B;136;	0.00441516	0.000745208	0.00167111	0.000389519	0.429543	0.000283269	0.0080978	0.0164451	0.423588	0.0606987	0.0541234
DNMT3B;110;	0.0398825	0.00030938	0.00161121	4.25165e-05	0.866445	0.000288629	0.000142489	0.000436872	0.00218182	0.000390047	0.0882697
DNMT3B;112;	7.07308e-07	3.41344e-07	7.10255e-06	1.59734e-06	5.27686e-05	6.66541e-07	0.0258804	7.98736e-06	0.973976	6.65438e-05	6.30445e-06
DNMT3B;113;	3.32736e-05	4.39414e-06	0.000110279	4.83379e-06	0.0748789	7.15078e-06	0.000526485	5.42783e-05	0.923653	0.000209131	0.000518556
SPTBN2;2171;	0.00963936	0.023817	0.000464918	0.00444574	0.00360831	0.000711848	0.00162743	0.00626859	0.00311497	0.217941	0.728361
MTA1;520;	0.999998	5.60545e-07	4.38322e-07	6.6178e-09	2.45446e-07	6.71924e-07	2.5954e-09	5.88828e-08	7.41836e-09	5.28263e-09	1.10109e-07
MTA1;522;	0.999909	9.8733e-06	3.52385e-05	1.99976e-07	1.69558e-05	2.20527e-05	1.1168e-07	2.65595e-06	3.60747e-07	1.82493e-07	3.04765e-06
MTA1;576;	1.34917e-06	1.29303e-06	6.68225e-06	1.31441e-05	2.78126e-05	1.58204e-06	0.979107	1.84478e-05	0.0193204	0.00148044	2.16237e-05
CD3EAP;126;	4.7424e-05	1.86338e-05	0.00194929	7.32168e-05	0.00347378	6.91437e-05	0.241123	0.000731389	0.751785	0.000610884	0.000117556
CD3EAP;128;	4.7424e-05	1.86338e-05	0.00194929	7.32168e-05	0.00347378	6.91437e-05	0.241123	0.000731389	0.751785	0.000610884	0.000117556
CD3EAP;130;	4.7424e-05	1.86338e-05	0.00194929	7.32168e-05	0.00347378	6.91437e-05	0.241123	0.000731389	0.751785	0.000610884	0.000117556
CD3EAP;138;	4.7424e-05	1.86338e-05	0.00194929	7.32168e-05	0.00347378	6.91437e-05	0.241123	0.000731389	0.751785	0.000610884	0.000117556
CD3EAP;287;	0.000162554	0.000603762	0.00139033	0.0598208	0.000407384	0.000891402	0.905648	0.0123656	0.00525911	0.0131583	0.000292523
KIF5B;933;	0.000960122	0.000119746	0.00104791	7.10291e-05	0.596109	8.15274e-05	0.00293288	0.00766489	0.383942	0.00431022	0.00276028
DKFZp666O0110;932;	0.000454198	0.00766761	0.000227081	0.00277013	9.35935e-05	0.000357911	0.000232479	0.987395	9.76833e-05	0.00063748	6.68473e-05
HNRNPUL1;716;	1.49854e-05	1.53144e-05	1.0484e-05	3.89858e-05	0.000174221	3.95619e-06	0.00196428	0.000282181	0.00674477	0.990262	0.000488579
HNRNPUL1;718;	1.49854e-05	1.53144e-05	1.0484e-05	3.89858e-05	0.000174221	3.95619e-06	0.00196428	0.000282181	0.00674477	0.990262	0.000488579
HNRNPUL1;727;	1.49854e-05	1.53144e-05	1.0484e-05	3.89858e-05	0.000174221	3.95619e-06	0.00196428	0.000282181	0.00674477	0.990262	0.000488579
HNRNPUL1;682;	0.710587	0.00132832	0.24789	7.28326e-05	0.00571739	0.0329057	5.39751e-05	0.00085465	0.000148511	4.43089e-05	0.000397519
HNRNPUL1;687;	0.710587	0.00132832	0.24789	7.28326e-05	0.00571739	0.0329057	5.39751e-05	0.00085465	0.000148511	4.43089e-05	0.000397519
FGFR1OP;152;	1.19626e-06	7.38987e-07	6.23952e-06	3.8132e-06	5.96602e-05	8.95398e-07	0.0801022	1.96578e-05	0.919231	0.000558876	1.52206e-05
FGFR1OP;156;	1.93187e-06	1.3748e-06	1.04579e-05	8.19134e-06	7.51669e-05	1.56738e-06	0.511139	4.84088e-05	0.487489	0.00120542	1.9274e-05
FGFR1OP;160;	1.93187e-06	1.3748e-06	1.04579e-05	8.19134e-06	7.51669e-05	1.56738e-06	0.511139	4.84088e-05	0.487489	0.00120542	1.9274e-05
ARD1A;182;	9.75933e-05	7.01861e-05	7.89453e-05	0.00016764	0.00193704	2.61527e-05	0.0124915	0.000756378	0.117584	0.859924	0.00686672
MCM3;668;	0.999829	0.000101924	1.32536e-05	6.75871e-07	1.41377e-05	1.87892e-05	2.31582e-07	1.26977e-05	6.23479e-07	6.70655e-07	7.69804e-06
MCM3;672;	0.999829	0.000101924	1.32536e-05	6.75871e-07	1.41377e-05	1.87892e-05	2.31582e-07	1.26977e-05	6.23479e-07	6.70655e-07	7.69804e-06
MCM3;160;	0.000692698	0.0144174	0.000597362	0.0224927	0.000193367	0.00108729	0.00106854	0.956826	0.000285717	0.00218153	0.000157218
ILK;186;	0.00151814	0.0689457	0.000648027	0.00607805	4.37654e-05	0.922294	4.09337e-05	0.000198631	2.03151e-05	5.76765e-05	0.000154387
GOLGA4;266;	0.00480393	0.00369014	0.724308	0.00704226	0.00804082	0.0412787	0.020308	0.17967	0.00819342	0.00196183	0.000702441
GOLGA4;71;	0.00583285	0.00655803	0.666308	0.0182809	0.00724492	0.0939556	0.0302745	0.15901	0.0086509	0.00289363	0.000991403
HDGFRP2;454;	0.00147895	5.68995e-05	0.961724	1.37696e-05	0.00035406	0.0362547	1.29999e-05	3.49296e-05	2.48161e-05	4.9967e-06	3.96215e-05
HDGFRP2;458;	9.86754e-05	8.70172e-06	0.996393	4.78909e-06	0.000109053	0.00334276	8.18609e-06	1.00312e-05	1.36595e-05	1.83355e-06	9.60597e-06
PDAP1;57;	0.00121018	0.00242594	0.000456121	0.00741826	0.00136925	0.000974042	0.00356456	0.000512869	0.00313939	0.0493949	0.929535
JUNB;259;	0.00257147	0.000631377	5.03464e-05	5.33178e-05	0.000198574	0.000164002	1.5641e-05	2.48109e-05	3.87755e-05	0.000117255	0.996134
JUNB;251;	0.0119719	0.00308758	0.000109961	0.000136616	0.000454785	0.000372722	3.30554e-05	8.4257e-05	8.10458e-05	0.000310521	0.983358
EPRS;880;	5.12112e-08	1.52732e-08	6.74205e-07	4.07708e-08	1.20835e-05	3.35806e-08	8.52757e-05	5.17357e-07	0.9999	1.24168e-06	2.77539e-07
EPRS;882;	4.42146e-07	1.51218e-07	6.64294e-06	5.04697e-07	6.62329e-05	3.81677e-07	0.00173478	3.62383e-06	0.998172	1.26176e-05	2.87312e-06
EPRS;883;	5.12112e-08	1.52732e-08	6.74205e-07	4.07708e-08	1.20835e-05	3.35806e-08	8.52757e-05	5.17357e-07	0.9999	1.24168e-06	2.77539e-07
EPRS;885;	5.12112e-08	1.52732e-08	6.74205e-07	4.07708e-08	1.20835e-05	3.35806e-08	8.52757e-05	5.17357e-07	0.9999	1.24168e-06	2.77539e-07
EPRS;886;	1.66645e-05	2.33574e-06	8.68042e-05	2.46439e-06	0.0421888	3.51662e-06	0.000391577	0.000103934	0.957052	9.15997e-05	6.04574e-05
EPRS;891;	5.14737e-08	1.46719e-08	6.7897e-07	3.72876e-08	1.37087e-05	3.2412e-08	6.55075e-05	4.99461e-07	0.999918	1.11925e-06	2.72402e-07
ACTN1;6;	4.26481e-05	4.1913e-05	0.000218231	8.06302e-05	0.000231154	2.83377e-05	0.00181791	0.996055	0.00104404	0.000420415	1.97031e-05
PRPF4B;20;	0.000183789	0.999766	1.18819e-06	1.0822e-05	8.4133e-07	1.83275e-05	2.452e-07	4.96302e-06	2.49346e-07	1.93698e-06	1.16373e-05
PRPF4B;330;	0.000163295	1.9572e-06	0.00153109	5.45182e-07	0.998165	1.063e-05	4.54458e-06	1.23568e-05	8.38766e-05	2.20025e-06	2.43133e-05
PRPF4B;578;	1.67612e-08	2.1308e-08	1.48667e-07	2.98567e-07	2.15802e-07	2.81551e-08	0.999954	1.31378e-06	3.80088e-05	5.8515e-06	6.43438e-08
PRPF4B;580;	2.96104e-08	3.60996e-08	2.53198e-07	4.57265e-07	4.10928e-07	4.58591e-08	0.999901	2.49138e-06	8.41035e-05	1.08559e-05	1.14094e-07
BUD13;197;	0.631324	0.000805345	0.00374647	5.33672e-05	0.350923	0.000597392	0.000109898	0.00148463	0.00103051	0.000270158	0.00965597
BUD13;210;	0.631324	0.000805345	0.00374647	5.33672e-05	0.350923	0.000597392	0.000109898	0.00148463	0.00103051	0.000270158	0.00965597
BUD13;211;	0.631324	0.000805345	0.00374647	5.33672e-05	0.350923	0.000597392	0.000109898	0.00148463	0.00103051	0.000270158	0.00965597
BUD13;214;	0.493711	0.000748967	0.00375792	5.42198e-05	0.48553	0.000587139	0.000119349	0.00133958	0.00119975	0.000293152	0.0126584
BUD13;139;	0.137654	0.000344392	0.0555512	3.93357e-05	0.801193	0.00115087	0.000121343	0.00161101	0.00106063	0.000108237	0.0011658
HDAC1;421;	4.43406e-06	4.21126e-07	0.999931	3.04636e-07	3.50118e-05	1.79291e-05	1.98711e-06	3.54363e-06	4.71282e-06	2.44953e-07	4.99993e-07
HDAC1;423;	4.43406e-06	4.21126e-07	0.999931	3.04636e-07	3.50118e-05	1.79291e-05	1.98711e-06	3.54363e-06	4.71282e-06	2.44953e-07	4.99993e-07
SNW1;224;	0.000162302	7.67887e-06	0.00698325	4.23231e-06	0.988482	3.29988e-05	0.000116195	0.00021891	0.00391075	2.44603e-05	5.74952e-05
SNW1;232;	0.000703402	1.98053e-05	0.0254453	7.32837e-06	0.971314	9.08637e-05	9.81212e-05	0.000476088	0.00172093	3.04948e-05	9.39233e-05
SNW1;234;	0.000370225	1.41444e-05	0.0118659	6.24677e-06	0.984219	5.57761e-05	0.000118542	0.000461837	0.00277964	3.21182e-05	7.68365e-05
HNRNPH3;216;	0.000132717	1.09602e-05	0.00351142	9.12126e-06	0.919547	3.61299e-05	0.000648117	0.000393546	0.0754912	9.0103e-05	0.000129778
HNRNPH1;104;	0.987383	0.0101975	0.000150645	1.77396e-05	4.00431e-05	0.00207538	2.16374e-06	6.12451e-05	3.58613e-06	5.49028e-06	6.28959e-05
DSP;22;	8.21427e-05	0.000536587	0.00013127	0.111656	0.000155003	0.000168099	0.109186	0.0020238	0.00228696	0.77301	0.00076394
DSP;2207;	1.32022e-06	2.28876e-06	1.68335e-06	2.73875e-07	3.56599e-08	0.999994	1.36394e-08	5.19673e-08	9.82767e-09	1.14267e-08	5.76302e-08
DSP;2209;	4.32289e-05	0.000271315	8.33639e-05	0.000107522	2.34536e-06	0.999476	2.16274e-06	6.35938e-06	1.05951e-06	1.68448e-06	4.68449e-06
DSP;2606;	0.019988	0.0122241	0.269743	0.0478443	0.0390034	0.37939	0.0740305	0.00599611	0.0468408	0.01585	0.0890891
DSP;2607;	0.019988	0.0122241	0.269743	0.0478443	0.0390034	0.37939	0.0740305	0.00599611	0.0468408	0.01585	0.0890891
DSP;2608;	0.019988	0.0122241	0.269743	0.0478443	0.0390034	0.37939	0.0740305	0.00599611	0.0468408	0.01585	0.0890891
DSP;2610;	0.019988	0.0122241	0.269743	0.0478443	0.0390034	0.37939	0.0740305	0.00599611	0.0468408	0.01585	0.0890891
EIF4H;21;	0.011121	0.000209125	0.924993	3.99188e-05	0.00217265	0.0609556	4.03027e-05	0.00010413	9.75587e-05	1.90807e-05	0.000247216
NSMCE4A;30;	0.129247	0.00150454	0.00349687	0.000147316	0.823962	0.000577614	0.000469763	0.00879487	0.00597768	0.00175023	0.0240718
NSMCE4A;32;	0.129247	0.00150454	0.00349687	0.000147316	0.823962	0.000577614	0.000469763	0.00879487	0.00597768	0.00175023	0.0240718
NSMCE4A;35;	0.0192946	0.000152466	0.00120014	1.8686e-05	0.974104	0.000110586	7.95505e-05	0.00105142	0.00128872	0.000176328	0.00252314
BRD2;298;	8.28932e-06	0.000213451	8.38528e-06	0.996436	5.13325e-06	2.44484e-05	0.000365757	0.000263629	2.44479e-05	0.00262636	2.41708e-05
BRD2;301;	8.28932e-06	0.000213451	8.38528e-06	0.996436	5.13325e-06	2.44484e-05	0.000365757	0.000263629	2.44479e-05	0.00262636	2.41708e-05
BRD2;305;	8.28932e-06	0.000213451	8.38528e-06	0.996436	5.13325e-06	2.44484e-05	0.000365757	0.000263629	2.44479e-05	0.00262636	2.41708e-05
CALD1;534;	0.000329403	0.992904	5.32638e-05	0.00289214	7.79548e-06	0.00356281	8.93815e-06	0.000189125	4.1987e-06	2.33982e-05	2.51529e-05
CALD1;504;	0.00211729	0.000296483	0.00102306	0.000170256	0.499303	0.000150717	0.00445631	0.00462147	0.426059	0.0214799	0.0403222
CALD1;510;	0.000802846	0.000111479	0.000616692	7.38189e-05	0.401149	7.00214e-05	0.00298848	0.00252264	0.574098	0.00798909	0.00957767
LRRC16A;1314;	9.4553e-06	9.4473e-06	3.47943e-05	5.98565e-05	0.000197008	6.64179e-06	0.865361	0.000879022	0.114797	0.0185859	5.99262e-05
LRRC16A;1315;	2.01077e-06	1.34805e-06	1.05912e-05	7.74932e-06	8.55865e-05	1.61685e-06	0.272166	3.56964e-05	0.726529	0.00113604	2.49756e-05
LRRC16A;967;	7.45372e-10	9.76956e-10	4.81005e-09	1.52888e-08	9.86336e-09	1.14198e-09	0.999997	3.1376e-08	2.70883e-06	7.10527e-07	4.96382e-09
LRRC16A;968;	1.59843e-08	2.12852e-08	8.66103e-08	2.94329e-07	2.13362e-07	2.06476e-08	0.999911	9.18243e-07	6.31471e-05	2.42303e-05	1.03842e-07
LRRC16A;1331;	1.53342e-07	1.57644e-07	1.38937e-06	1.50979e-06	2.77323e-06	2.05975e-07	0.999076	1.33727e-05	0.000860751	4.27769e-05	5.65012e-07
LRRC16A;1093;	4.54859e-06	3.4198e-06	1.81013e-05	1.83767e-05	0.000160951	3.01938e-06	0.351412	0.000151542	0.642478	0.00570313	4.69507e-05
LRRC16A;1094;	4.10233e-06	3.04869e-06	1.65968e-05	1.64594e-05	0.000148315	2.75612e-06	0.332661	0.000127268	0.662074	0.00490293	4.37311e-05
LRRC16A;1288;	5.81951e-05	4.72587e-05	0.00113868	0.000285171	0.001029	9.08865e-05	0.925963	0.00995342	0.0593894	0.00196082	8.41573e-05
LRRC16A;1290;	1.45058e-05	1.49437e-05	0.000225988	0.000127602	0.000194523	2.55955e-05	0.983462	0.00250141	0.012527	0.000881243	2.51228e-05
LRRC16A;1291;	9.80781e-06	1.20956e-05	0.000122132	0.000126711	0.000105102	1.77272e-05	0.990512	0.00206071	0.00612206	0.000893853	1.80494e-05
PTGES3;124;	0.00033391	0.00449504	9.6284e-05	0.0510406	0.000210525	0.000236131	0.00241534	0.00135796	0.000768941	0.928966	0.0100792
PTGES3;148;	0.00129131	0.00623963	0.000604421	0.073906	0.00137606	0.00136932	0.0158149	0.00182699	0.005847	0.722683	0.169041
PTGES3;151;	0.000776926	0.00344961	0.000481361	0.0627407	0.00105379	0.000951573	0.021519	0.00148608	0.00602801	0.823363	0.0781501
EIF1;9;	0.000116409	0.000117634	0.0013435	0.00070776	0.0014553	0.000150207	0.874204	0.0565675	0.0590323	0.00614956	0.000155478
SHROOM2;1425;	0.0935668	0.00362887	0.173148	0.00141587	0.321184	0.0480587	0.00337149	0.00169459	0.0168123	0.0024576	0.334661
SHROOM2;1427;	0.0935668	0.00362887	0.173148	0.00141587	0.321184	0.0480587	0.00337149	0.00169459	0.0168123	0.0024576	0.334661
SHROOM2;779;	0.000121374	7.67682e-05	4.56005e-05	0.000112643	0.000512593	3.84907e-05	0.000390853	5.00758e-05	0.00125383	0.00557721	0.991821
SHROOM2;921;	0.170466	0.00958874	0.16964	0.00304458	0.0879853	0.218014	0.00297171	0.00192104	0.00835446	0.00262123	0.325393
SHROOM2;922;	0.170466	0.00958874	0.16964	0.00304458	0.0879853	0.218014	0.00297171	0.00192104	0.00835446	0.00262123	0.325393
CSTF3;691;	0.999811	8.6088e-05	6.07048e-06	6.763e-07	1.52099e-05	1.37163e-05	2.16935e-07	3.3043e-06	6.64046e-07	9.01224e-07	6.16985e-05
EHMT1;1017;	0.000979731	0.629428	0.000139982	0.362542	7.14382e-05	0.00263875	0.000184784	0.000638861	7.16328e-05	0.00172346	0.00158094
FNBP1L;488;	0.0999819	0.00514891	0.749508	0.000623801	0.0238793	0.0256709	0.000802229	0.0914292	0.00173248	0.000457744	0.000765482
FNBP1L;489;	0.0999819	0.00514891	0.749508	0.000623801	0.0238793	0.0256709	0.000802229	0.0914292	0.00173248	0.000457744	0.000765482
TOMM70A;91;	4.80732e-05	3.59822e-05	7.28884e-05	0.000124147	0.00134221	1.81249e-05	0.0587539	0.000857607	0.565298	0.372174	0.00127456
TOMM70A;96;	4.67142e-05	3.70205e-05	7.01173e-05	0.000134951	0.00118494	1.81684e-05	0.0641944	0.0008686	0.441631	0.490575	0.00123933
GTF3C3;43;	4.72894e-06	1.86043e-07	1.33391e-05	9.50754e-08	0.999765	4.7929e-07	2.11997e-06	1.17882e-06	0.000191091	1.23112e-06	2.04045e-05
CHCHD3;50;	7.54927e-07	1.22622e-07	4.36094e-08	2.91435e-08	9.3963e-07	4.02881e-08	3.99539e-08	3.68312e-08	2.17177e-07	4.51806e-07	0.999997
TFIP11;210;	2.13845e-09	1.25433e-07	1.87284e-09	1	6.58772e-10	1.503e-08	1.48327e-08	1.55072e-08	1.70544e-09	5.30691e-08	4.24077e-09
DDX21;71;	1.09166e-05	3.23177e-05	2.17733e-05	0.000883499	5.07162e-05	1.21293e-05	0.219995	0.000773359	0.00240104	0.775724	9.5169e-05
DDX21;84;	1.63657e-07	4.51474e-09	8.59353e-07	1.79237e-09	0.999997	1.26195e-08	3.35741e-08	6.38829e-08	1.82087e-06	1.5796e-08	9.69798e-08
DDX21;89;	1.29064e-06	4.50367e-08	9.77356e-06	2.02788e-08	0.999956	1.26283e-07	4.78456e-07	8.61213e-07	3.01191e-05	1.8615e-07	7.87519e-07
EPB41L2;550;	1.95212e-06	1.12524e-06	2.66269e-06	1.13773e-07	4.36258e-08	0.999994	1.01038e-08	3.79936e-08	9.00806e-09	8.08692e-09	5.62013e-08
FXR1;420;	0.00141762	0.000115396	0.00853773	0.000105463	0.847278	0.000496126	0.00282282	0.000359141	0.116025	0.000960187	0.0218822
FXR1;423;	0.00141762	0.000115396	0.00853773	0.000105463	0.847278	0.000496126	0.00282282	0.000359141	0.116025	0.000960187	0.0218822
FXR1;485;	5.58887e-05	5.62006e-06	0.000531801	5.75201e-06	0.513586	1.48264e-05	0.000608232	9.15233e-05	0.484742	0.000108196	0.000250666
FXR1;494;	0.000167812	2.36192e-05	0.00333076	3.66878e-05	0.137102	0.000101394	0.00519191	0.000210962	0.852334	0.000418058	0.00108291
FXR1;496;	2.63153e-05	3.47263e-06	0.00044997	4.50591e-06	0.069273	1.0143e-05	0.000889197	8.50193e-05	0.929099	7.50125e-05	8.43138e-05
FXR1;403;	0.000123837	2.21967e-05	0.00173587	4.21549e-05	0.0452967	8.57167e-05	0.00745259	0.000160914	0.943127	0.000569058	0.00138406
FXR1;406;	9.96461e-05	1.95521e-05	0.00221478	4.19154e-05	0.0296489	8.67531e-05	0.010631	0.000172866	0.955886	0.000459296	0.000739688
FXR1;409;	3.28117e-08	7.4238e-09	3.24621e-07	1.47387e-08	1.7653e-05	1.54629e-08	1.0608e-05	1.98652e-07	0.99997	5.12403e-07	2.17716e-07
FXR1;413;	0.000123837	2.21967e-05	0.00173587	4.21549e-05	0.0452967	8.57167e-05	0.00745259	0.000160914	0.943127	0.000569058	0.00138406
RAB13;178;	0.00015738	7.39294e-05	0.000676666	6.83272e-06	4.01528e-06	0.999069	8.76431e-07	8.1621e-06	7.71331e-07	5.65755e-07	1.94195e-06
OCIAD1;108;	4.74564e-08	1.41536e-08	6.17577e-07	3.80676e-08	1.11677e-05	3.13491e-08	7.92355e-05	4.51946e-07	0.999907	1.16625e-06	2.69928e-07
OCIAD1;122;	2.634e-06	8.56816e-08	1.66014e-05	4.21922e-08	0.999923	3.20275e-07	8.48414e-07	5.65976e-07	5.04983e-05	3.57371e-07	4.65119e-06
OCIAD1;123;	2.29523e-06	7.07746e-08	1.73147e-05	3.39995e-08	0.99994	2.81406e-07	6.60825e-07	4.90476e-07	3.56956e-05	2.65185e-07	3.15172e-06
DKFZp686K101;740;	0.000284384	4.97919e-05	0.000147198	4.06958e-05	0.00531336	5.73613e-05	0.000302133	5.07882e-05	0.00348895	0.000919995	0.989345
ZC3H13;238;	0.00552443	0.00682594	0.242285	0.105512	0.0139389	0.169068	0.372443	0.0117822	0.0473606	0.0152882	0.00997092
ZC3H13;241;	0.00552443	0.00682594	0.242285	0.105512	0.0139389	0.169068	0.372443	0.0117822	0.0473606	0.0152882	0.00997092
ZC3H13;242;	0.00109241	0.000370578	0.944512	0.00111129	0.00808437	0.0166803	0.0147914	0.00157318	0.0103997	0.000599776	0.000785218
ZC3H13;986;	4.43564e-07	9.02431e-06	7.16858e-07	0.999929	2.64226e-07	3.30709e-06	1.88017e-05	4.30957e-06	1.11468e-06	3.13905e-05	1.37768e-06
ZC3H13;993;	1.42788e-07	3.53764e-06	2.07452e-07	0.999977	7.80238e-08	9.499e-07	4.9896e-06	1.80047e-06	3.1422e-07	1.03379e-05	3.78548e-07
ZC3H13;265;	2.01351e-06	1.11735e-06	1.68338e-05	4.78199e-06	0.000120115	1.52142e-06	0.0958523	8.73604e-05	0.903621	0.000283793	9.53853e-06
ZC3H13;207;	3.26941e-06	9.71055e-08	1.05734e-05	4.35076e-08	0.999933	3.04295e-07	7.42914e-07	5.27648e-07	4.28946e-05	4.16667e-07	8.24159e-06
ZC3H13;877;	0.000482237	9.23678e-05	0.000323095	8.81007e-05	0.00936188	0.00012332	0.000736669	9.64893e-05	0.00792844	0.00178796	0.978979
PCBP1;262;	1.48497e-07	2.94547e-08	1.23015e-06	4.75541e-08	0.00012718	5.35351e-08	2.17485e-05	1.08742e-06	0.999846	1.79421e-06	7.56588e-07
PCBP1;263;	1.48497e-07	2.94547e-08	1.23015e-06	4.75541e-08	0.00012718	5.35351e-08	2.17485e-05	1.08742e-06	0.999846	1.79421e-06	7.56588e-07
PCBP1;264;	1.48497e-07	2.94547e-08	1.23015e-06	4.75541e-08	0.00012718	5.35351e-08	2.17485e-05	1.08742e-06	0.999846	1.79421e-06	7.56588e-07
ZFP36L1;80;	1.64666e-05	2.56079e-06	0.00028083	4.08527e-06	0.0193147	8.33824e-06	0.0010326	4.01669e-05	0.979145	6.73029e-05	8.77584e-05
ZFP36L1;81;	1.64666e-05	2.56079e-06	0.00028083	4.08527e-06	0.0193147	8.33824e-06	0.0010326	4.01669e-05	0.979145	6.73029e-05	8.77584e-05
SIRT1;14;	0.000164871	2.3839e-05	0.00704766	3.25483e-05	0.153476	8.72043e-05	0.0064111	0.000999168	0.831202	0.000320968	0.000234608
SIRT1;26;	0.00107936	0.000180678	0.0219901	0.000192784	0.284731	0.000386137	0.0207327	0.0369834	0.630977	0.00202802	0.000719406
SIRT1;27;	0.00107936	0.000180678	0.0219901	0.000192784	0.284731	0.000386137	0.0207327	0.0369834	0.630977	0.00202802	0.000719406
EIF3C;166;	0.958642	0.0394886	0.000116225	5.26981e-05	0.000166142	0.000464164	7.99025e-06	0.000293353	1.63788e-05	4.50138e-05	0.000707722
EIF3C;9;	0.0153407	0.983585	3.17869e-05	0.000100614	2.72606e-05	0.000395991	4.43723e-06	8.5741e-05	5.7364e-06	3.18214e-05	0.000390637
EIF3C;11;	0.0222168	0.975382	5.48216e-05	0.000213874	6.07485e-05	0.000534549	1.01888e-05	0.000178826	1.36163e-05	8.9499e-05	0.00124525
EIF3C;13;	0.0461586	0.949451	9.58388e-05	0.00031128	0.000106708	0.000978666	1.61105e-05	0.000244289	2.23624e-05	0.000133705	0.00248189
EIF3C;15;	0.0222168	0.975382	5.48216e-05	0.000213874	6.07485e-05	0.000534549	1.01888e-05	0.000178826	1.36163e-05	8.9499e-05	0.00124525
EIF3C;16;	0.0461586	0.949451	9.58388e-05	0.00031128	0.000106708	0.000978666	1.61105e-05	0.000244289	2.23624e-05	0.000133705	0.00248189
EIF3C;18;	0.0222168	0.975382	5.48216e-05	0.000213874	6.07485e-05	0.000534549	1.01888e-05	0.000178826	1.36163e-05	8.9499e-05	0.00124525
EIF3C;178;	0.999682	5.81747e-05	1.39059e-05	8.90452e-07	6.89408e-05	1.59879e-05	4.59119e-07	6.45758e-06	1.82444e-06	1.77004e-06	0.000149937
EIF3C;181;	0.999663	5.89339e-05	1.4607e-05	9.21556e-07	7.26281e-05	1.68407e-05	4.77481e-07	6.49099e-06	1.90408e-06	1.82813e-06	0.000162432
EIF3C;182;	0.999663	5.89339e-05	1.4607e-05	9.21556e-07	7.26281e-05	1.68407e-05	4.77481e-07	6.49099e-06	1.90408e-06	1.82813e-06	0.000162432
EIF3C;39;	0.995958	0.00370101	2.78717e-05	7.07502e-06	3.47524e-05	0.000110617	1.24512e-06	3.96811e-05	2.72292e-06	5.70948e-06	0.000111789
IARS2;186;	0.000174974	2.04031e-06	0.000178236	5.42154e-07	0.999372	6.90728e-06	3.87784e-06	5.62898e-06	9.06098e-05	3.30576e-06	0.000162054
CTNNB1;552;	0.950136	0.0374285	0.000442479	6.08948e-05	9.03731e-05	0.0115062	6.09147e-06	0.000140538	9.20313e-06	1.4562e-05	0.000165052
CTNNB1;191;	0.0696259	0.928608	9.34545e-05	0.000101705	4.89813e-05	0.00100434	6.20318e-06	0.000311885	8.18112e-06	2.84827e-05	0.000163198
MATR3;188;	0.000410304	0.00510709	0.000371441	0.000400219	1.11187e-05	0.993594	7.70324e-06	7.07919e-05	4.19241e-06	7.50677e-06	1.56977e-05
MATR3;195;	0.134836	0.350808	0.0521869	0.00951457	0.00334719	0.214716	0.00104277	0.230144	0.000869239	0.00124684	0.0012874
MATR3;206;	0.913519	0.00669534	0.0480352	0.000188987	0.00425976	0.0186802	9.69135e-05	0.00776843	0.000213242	0.000109782	0.000433573
MATR3;596;	0.977149	0.000720525	0.0157505	2.39292e-05	0.00176735	0.00384294	1.59065e-05	0.000529296	4.56234e-05	1.76723e-05	0.000137543
MATR3;598;	0.998307	0.000267106	4.10988e-05	3.94153e-06	0.000170376	7.04285e-05	1.67082e-06	1.63008e-05	6.03928e-06	6.98374e-06	0.00110908
MATR3;604;	0.893008	0.00131994	0.0871166	6.13435e-05	0.00690578	0.00939043	5.14809e-05	0.00160539	0.000156719	4.87505e-05	0.000335825
MATR3;606;	0.974187	0.00066082	0.018474	2.38384e-05	0.00225204	0.00362085	1.72457e-05	0.000541088	5.19857e-05	1.8797e-05	0.000152001
MATR3;795;	0.00864624	0.0143474	0.389207	0.0351466	0.00672829	0.128455	0.0265725	0.378301	0.00742168	0.00397034	0.0012039
MATR3;796;	0.00836292	0.0127483	0.491012	0.0315936	0.00669539	0.15027	0.0251443	0.26234	0.00715767	0.00350405	0.00117249
MATR3;9;	0.667203	0.0528486	0.106165	0.00137956	0.00702053	0.0923011	0.000457515	0.0702652	0.00070646	0.000514528	0.0011376
RPS6KA1;372;	0.005638	0.000129127	0.112911	3.58681e-05	0.872769	0.000512473	0.000305752	0.00379537	0.00344152	0.000122173	0.00033915
GTF2F1;217;	1.73392e-06	2.53789e-06	2.41711e-05	7.19485e-05	1.36384e-05	6.98112e-06	0.998999	2.89561e-05	0.000667606	0.000175391	7.98329e-06
GTF2F1;218;	1.70512e-06	2.53397e-06	2.29783e-05	7.38183e-05	1.32114e-05	6.83265e-06	0.999014	2.81977e-05	0.000646372	0.00018233	8.05503e-06
GTF2F1;221;	1.80032e-06	2.80307e-06	2.25617e-05	8.86372e-05	1.32234e-05	7.23215e-06	0.998984	2.9561e-05	0.000625858	0.000215487	8.84733e-06
GTF2F1;224;	1.80032e-06	2.80307e-06	2.25617e-05	8.86372e-05	1.32234e-05	7.23215e-06	0.998984	2.9561e-05	0.000625858	0.000215487	8.84733e-06
C9orf40;69;	0.0011635	0.00126417	0.000942107	0.00539131	0.00496358	0.000874359	0.0266722	0.00101037	0.0319845	0.205931	0.719803
C9orf40;71;	0.0011635	0.00126417	0.000942107	0.00539131	0.00496358	0.000874359	0.0266722	0.00101037	0.0319845	0.205931	0.719803
C9orf40;76;	0.00794634	0.0103695	0.012982	0.0101869	0.00129236	0.945281	0.00090457	0.000528246	0.00062059	0.000755261	0.00913356
KIN;222;	8.80296e-06	0.000214878	9.33149e-06	0.999368	3.35606e-06	8.78759e-05	6.90089e-05	2.05476e-05	8.84272e-06	0.000172187	3.75308e-05
DDX5;2;	0.000118152	0.9975	1.61873e-05	0.00164241	3.21399e-06	0.000572172	4.17051e-06	0.000116561	1.90917e-06	1.40076e-05	1.13544e-05
DDX5;5;	0.00329506	0.0958584	0.00290444	0.389534	0.000316576	0.50282	0.000803955	0.00109903	0.000264692	0.00106695	0.00203699
DDX5;6;	0.000237041	0.989486	4.03684e-05	0.00868299	9.36723e-06	0.000860503	1.62748e-05	0.000568532	6.63644e-06	6.12204e-05	3.14702e-05
SMARCE1;353;	0.00176867	0.000618622	0.0439674	0.00069503	0.0213146	0.0012581	0.0172939	0.880676	0.029927	0.0020567	0.000423894
NAP1L4;5;	4.81019e-09	4.88211e-09	3.65436e-08	5.6979e-08	9.2911e-08	6.95175e-09	0.999942	1.30502e-07	5.50154e-05	2.54966e-06	3.69544e-08
NAP1L4;7;	3.0043e-09	2.99163e-09	2.53081e-08	3.43786e-08	5.90987e-08	4.5023e-09	0.999965	8.78621e-08	3.33274e-05	1.24105e-06	2.04706e-08
NAP1L4;12;	3.0043e-09	2.99163e-09	2.53081e-08	3.43786e-08	5.90987e-08	4.5023e-09	0.999965	8.78621e-08	3.33274e-05	1.24105e-06	2.04706e-08
NAP1L4;14;	3.0043e-09	2.99163e-09	2.53081e-08	3.43786e-08	5.90987e-08	4.5023e-09	0.999965	8.78621e-08	3.33274e-05	1.24105e-06	2.04706e-08
NAP1L4;53;	0.00034201	0.000138624	0.00188778	0.000528151	0.0148638	0.000349314	0.109744	0.00053646	0.845251	0.0113934	0.0149664
NAP1L4;54;	1.70754e-06	9.84542e-07	5.20454e-06	3.61437e-06	9.52266e-05	8.24292e-07	0.0103395	3.20743e-05	0.987955	0.00153902	2.64608e-05
TAF7;227;	0.000210467	0.0238298	5.37244e-05	0.962612	4.55739e-05	0.000322944	0.000367598	0.000875499	9.20233e-05	0.0107501	0.000840484
TAF7;228;	0.000210467	0.0238298	5.37244e-05	0.962612	4.55739e-05	0.000322944	0.000367598	0.000875499	9.20233e-05	0.0107501	0.000840484
TAF7;229;	0.000210467	0.0238298	5.37244e-05	0.962612	4.55739e-05	0.000322944	0.000367598	0.000875499	9.20233e-05	0.0107501	0.000840484
TAF7;230;	0.000210467	0.0238298	5.37244e-05	0.962612	4.55739e-05	0.000322944	0.000367598	0.000875499	9.20233e-05	0.0107501	0.000840484
MCM4;26;	0.000118154	1.42968e-05	2.53365e-05	6.74333e-06	0.00202677	9.77695e-06	3.69649e-05	1.55018e-05	0.000534525	0.000215348	0.996997
MCM4;31;	0.000118154	1.42968e-05	2.53365e-05	6.74333e-06	0.00202677	9.77695e-06	3.69649e-05	1.55018e-05	0.000534525	0.000215348	0.996997
MCM4;32;	0.000118154	1.42968e-05	2.53365e-05	6.74333e-06	0.00202677	9.77695e-06	3.69649e-05	1.55018e-05	0.000534525	0.000215348	0.996997
MCM4;34;	9.51028e-05	1.06573e-05	1.80348e-05	4.61954e-06	0.00137979	7.24661e-06	2.24754e-05	1.04506e-05	0.000303157	0.000130396	0.998018
MCM4;120;	1.05982e-06	5.14229e-07	1.10216e-05	2.46776e-06	7.62729e-05	1.04357e-06	0.0393036	1.11739e-05	0.960489	9.45817e-05	9.62149e-06
TCEB3;137;	9.13232e-05	1.94861e-05	0.998348	1.87122e-05	0.000270476	0.000813293	8.13689e-05	0.000248166	9.06475e-05	8.7739e-06	9.4908e-06
TCEB3;125;	0.000423692	8.02711e-06	0.0146318	3.05251e-06	0.984121	6.85613e-05	3.06272e-05	3.87978e-05	0.000536868	1.06491e-05	0.000126576
ARID3A;77;	6.05601e-05	1.0084e-06	9.63511e-05	3.24802e-07	0.999648	3.47561e-06	2.98219e-06	3.19448e-06	8.70311e-05	2.24117e-06	9.51356e-05
ARID3A;81;	6.5529e-05	1.10714e-06	9.09089e-05	3.54498e-07	0.999615	3.59689e-06	3.23777e-06	3.44246e-06	9.65113e-05	2.56186e-06	0.000117851
ARID3A;88;	4.80525e-05	8.58414e-07	0.000100082	2.92145e-07	0.999681	3.1854e-06	2.87339e-06	2.86862e-06	8.62733e-05	1.96548e-06	7.30325e-05
ARID3A;119;	0.0386458	0.000370507	0.0080447	7.51221e-05	0.84376	0.00114065	0.000255657	0.000328284	0.00310309	0.00035002	0.103926
HMGN3;31;	0.000203398	0.000292279	0.0043757	0.00850656	0.00105582	0.00170243	0.961057	0.00137306	0.0159972	0.00468775	0.000748672
HMGN3;6;	4.08867e-05	0.000107306	0.000229491	9.97796e-05	4.30416e-06	0.999496	4.35265e-06	6.94769e-06	2.0891e-06	2.33226e-06	6.94666e-06
DPPA4;221;	0.000432713	0.991603	4.12673e-05	0.000997139	6.15449e-06	0.00681546	4.71834e-06	5.43715e-05	2.67188e-06	1.27478e-05	3.01368e-05
DPPA4;226;	0.964609	0.0100625	0.000654173	4.35047e-05	9.90026e-05	0.0242595	5.39139e-06	7.88102e-05	8.65749e-06	1.0701e-05	0.000169003
HMG20A;105;	0.818491	0.173744	0.000744874	0.000195188	0.000325201	0.003745	2.41293e-05	0.0022483	3.78942e-05	7.83453e-05	0.000365823
PARVA;4;	8.06974e-05	0.000668853	8.91311e-05	0.0389685	0.000123574	9.66559e-05	0.0258768	0.0109969	0.00132016	0.921432	0.000346823
PARVA;8;	7.19139e-05	0.000567176	7.99297e-05	0.0294443	0.000114819	8.33424e-05	0.024817	0.0103786	0.00127263	0.932859	0.000311676
PARVA;10;	6.11203e-05	0.000448756	6.85544e-05	0.01985	0.000103694	6.75782e-05	0.0233736	0.00956076	0.00121245	0.944986	0.000267963
CXADR;293;	0.63652	0.00170865	0.226874	0.000134285	0.0100088	0.121852	9.45139e-05	0.000415709	0.000271955	7.94273e-05	0.00204013
CXADR;301;	0.56817	0.00274273	0.0718145	0.00016121	0.00330621	0.351467	6.78069e-05	0.000298668	0.00015248	6.57904e-05	0.00175365
EAP1;657;	0.00306887	0.000826748	0.00572653	4.42684e-05	4.38597e-05	0.990159	6.59493e-06	9.48775e-05	6.73249e-06	4.89378e-06	1.79494e-05
EAP1;658;	0.000148077	5.05839e-05	0.00148533	6.43761e-06	5.3613e-06	0.998291	1.08645e-06	8.31193e-06	9.90116e-07	6.10742e-07	2.15795e-06
EAP1;659;	0.15666	0.448835	0.0347828	0.00773071	0.00287429	0.15352	0.000798026	0.191758	0.000703517	0.00110568	0.00123218
EAP1;662;	0.129967	0.000366817	0.797498	4.49785e-05	0.0636881	0.00657381	8.72843e-05	0.00059994	0.00043127	5.45139e-05	0.000688352
EAP1;665;	0.0399564	0.000202767	0.946015	2.27057e-05	0.00494418	0.0083153	2.93714e-05	0.000260008	9.54744e-05	1.67339e-05	0.000141854
NCBP1;22;	0.00186435	0.00014243	0.0870547	2.53465e-05	0.000127524	0.910684	1.04538e-05	3.7625e-05	1.41411e-05	5.03293e-06	3.48437e-05
NCBP1;33;	0.00186435	0.00014243	0.0870547	2.53465e-05	0.000127524	0.910684	1.04538e-05	3.7625e-05	1.41411e-05	5.03293e-06	3.48437e-05
EXOC1;470;	0.000901166	0.0187267	0.000251692	0.0717985	0.000470622	0.000433745	0.00471842	0.0587199	0.00146551	0.839676	0.00283809
EXOC1;472;	0.000901166	0.0187267	0.000251692	0.0717985	0.000470622	0.000433745	0.00471842	0.0587199	0.00146551	0.839676	0.00283809
EXOC1;473;	0.000827951	0.0164325	0.000247436	0.0705944	0.000454568	0.000413346	0.00500706	0.063712	0.00147911	0.838314	0.00251789
SMAD2;2;	3.19767e-05	2.41849e-06	1.69554e-06	5.02719e-07	6.93081e-05	1.09069e-06	9.68198e-07	1.05348e-06	7.5791e-06	7.36967e-06	0.999876
HCFC1;6;	0.975635	0.000170924	0.00390848	1.00038e-05	0.0187214	0.000545097	1.36705e-05	0.000122183	8.21747e-05	1.94056e-05	0.000772153
HCFC1;666;	0.00991299	0.404166	0.00226204	0.00344009	0.000126539	0.578186	6.53152e-05	0.00152105	4.13001e-05	9.47772e-05	0.000183895
HCFC1;669;	0.0539644	0.0477752	0.00747893	0.000528816	0.000244142	0.888534	4.18648e-05	0.00116838	4.12681e-05	5.0261e-05	0.000172341
HCFC1;674;	0.0539644	0.0477752	0.00747893	0.000528816	0.000244142	0.888534	4.18648e-05	0.00116838	4.12681e-05	5.0261e-05	0.000172341
ADD1;12;	0.229782	0.00143424	0.553183	0.000153032	0.00949255	0.203364	0.000116597	0.000422382	0.000311711	8.08946e-05	0.00166006
ADD1;631;	1.17702e-05	1.71521e-05	7.10388e-06	4.19916e-05	7.77492e-05	3.03463e-06	0.000995766	0.000654722	0.00153066	0.996501	0.000159151
ADD1;358;	8.22633e-05	0.0384961	2.12971e-05	0.960167	1.00615e-05	0.000243202	5.56316e-05	0.000279178	1.44408e-05	0.000527967	0.000102907
ADD2;689;	0.000344249	8.19626e-06	0.000111021	1.90222e-06	0.998463	7.10848e-06	1.84347e-05	0.00012268	0.000660554	3.14921e-05	0.000231098
ADD2;693;	0.000344249	8.19626e-06	0.000111021	1.90222e-06	0.998463	7.10848e-06	1.84347e-05	0.00012268	0.000660554	3.14921e-05	0.000231098
ADD2;697;	0.000225472	6.07019e-06	8.90746e-05	1.53103e-06	0.998675	5.42264e-06	1.67414e-05	0.00010105	0.00067868	2.69534e-05	0.000174077
ADD2;699;	0.000344249	8.19626e-06	0.000111021	1.90222e-06	0.998463	7.10848e-06	1.84347e-05	0.00012268	0.000660554	3.14921e-05	0.000231098
ADD2;701;	0.00252572	0.000349771	0.937024	0.000216261	0.0203115	0.00265618	0.0018152	0.030294	0.00431652	0.000275048	0.000215562
ADD2;703;	0.00252572	0.000349771	0.937024	0.000216261	0.0203115	0.00265618	0.0018152	0.030294	0.00431652	0.000275048	0.000215562
ADD2;613;	3.11186e-05	0.998902	2.64686e-06	0.000958682	1.10544e-06	4.44326e-05	1.6928e-06	3.69651e-05	7.93981e-07	1.25894e-05	8.07245e-06
ADD2;617;	6.80405e-05	0.994803	7.40497e-06	0.00482348	2.8888e-06	0.000129263	5.34515e-06	0.000100334	2.27219e-06	3.75175e-05	2.05736e-05
ADD2;619;	0.000157904	0.969388	2.08981e-05	0.0295578	8.42227e-06	0.000340591	1.93913e-05	0.000289539	7.48125e-06	0.000144587	6.48573e-05
ADD2;596;	9.61574e-05	0.999804	1.4139e-06	4.03851e-05	1.18532e-06	1.70701e-05	5.74226e-07	1.04238e-05	4.96168e-07	6.52801e-06	2.17463e-05
ADD2;600;	9.61574e-05	0.999804	1.4139e-06	4.03851e-05	1.18532e-06	1.70701e-05	5.74226e-07	1.04238e-05	4.96168e-07	6.52801e-06	2.17463e-05
ADD2;604;	0.000129259	0.999683	2.60409e-06	7.05829e-05	2.13582e-06	2.04688e-05	1.19416e-06	5.94995e-05	9.73485e-07	1.35233e-05	1.6818e-05
TXLNG;97;	0.0200732	0.00424964	0.00100574	5.71151e-05	4.45439e-05	0.974442	5.04558e-06	4.60904e-05	5.94799e-06	6.66389e-06	6.41772e-05
TXLNG;105;	0.00062761	0.00132843	0.000152318	2.54114e-05	4.76101e-06	0.997839	1.20229e-06	1.22772e-05	1.01435e-06	1.39374e-06	6.49996e-06
DEK;51;	2.22356e-05	2.92559e-06	0.000341644	3.77651e-06	0.0622125	8.28511e-06	0.000736004	6.7939e-05	0.936459	6.67969e-05	7.86384e-05
DEK;68;	2.22356e-05	2.92559e-06	0.000341644	3.77651e-06	0.0622125	8.28511e-06	0.000736004	6.7939e-05	0.936459	6.67969e-05	7.86384e-05
PI4K2A;44;	0.0103239	0.00022885	0.00115126	5.12815e-05	0.535108	0.000236074	0.000233084	0.000303326	0.00438564	0.000660614	0.447318
PI4K2A;47;	0.0100985	0.000227542	0.00118208	5.19801e-05	0.497755	0.000245153	0.000234641	0.000289101	0.00432859	0.00064729	0.48494
PI4K2A;51;	0.0103239	0.00022885	0.00115126	5.12815e-05	0.535108	0.000236074	0.000233084	0.000303326	0.00438564	0.000660614	0.447318
ZYX;202;	0.00204769	0.000606149	0.396513	0.000665802	0.0013401	0.596899	0.000515694	0.000306781	0.000447646	0.000115983	0.00054175
ZYX;203;	0.00196055	0.000486381	0.257195	0.000399474	0.000929326	0.737844	0.000258699	0.00019215	0.000250926	7.07681e-05	0.000413084
ZYX;210;	0.00108565	0.000425018	0.463999	0.000531042	0.000665205	0.532084	0.000374165	0.000301849	0.000260997	7.11373e-05	0.000201686
ZYX;212;	0.00108565	0.000425018	0.463999	0.000531042	0.000665205	0.532084	0.000374165	0.000301849	0.000260997	7.11373e-05	0.000201686
ZYX;213;	0.00108565	0.000425018	0.463999	0.000531042	0.000665205	0.532084	0.000374165	0.000301849	0.000260997	7.11373e-05	0.000201686
ZYX;341;	3.18346e-08	9.98422e-09	2.43578e-07	2.77937e-08	6.40558e-06	1.89806e-08	4.20034e-05	1.81542e-07	0.999949	1.38293e-06	3.94092e-07
ZYX;348;	1.7276e-09	5.46677e-10	1.42904e-08	1.48715e-09	3.72655e-07	9.91612e-10	2.95359e-06	1.42465e-08	0.999997	7.55453e-08	1.55727e-08
ZYX;350;	7.11237e-09	2.2196e-09	6.08973e-08	6.11437e-09	1.52976e-06	4.25119e-09	1.12169e-05	5.02438e-08	0.999987	2.858e-07	6.91708e-08
ZYX;338;	1.78344e-08	6.37201e-09	7.28329e-08	1.66854e-08	2.77771e-06	7.82461e-09	2.05528e-05	1.41502e-07	0.999974	2.2202e-06	2.99553e-07
ZYX;318;	3.02773e-07	1.65376e-07	1.88456e-06	7.38548e-07	1.97249e-05	2.15914e-07	0.0135202	5.98294e-06	0.98637	7.77666e-05	2.82637e-06
ZYX;319;	3.02773e-07	1.65376e-07	1.88456e-06	7.38548e-07	1.97249e-05	2.15914e-07	0.0135202	5.98294e-06	0.98637	7.77666e-05	2.82637e-06
ZYX;327;	3.02773e-07	1.65376e-07	1.88456e-06	7.38548e-07	1.97249e-05	2.15914e-07	0.0135202	5.98294e-06	0.98637	7.77666e-05	2.82637e-06
ZYX;404;	0.000640795	0.000273899	0.000372517	9.53251e-06	5.52129e-06	0.998681	9.25576e-07	1.0182e-05	9.09121e-07	8.39498e-07	4.00062e-06
ARHGAP1;49;	2.31244e-05	0.999961	2.78681e-07	5.08386e-06	1.70856e-07	5.43255e-06	6.99721e-08	1.15424e-06	6.11351e-08	5.52183e-07	2.58073e-06
ARHGAP1;50;	5.03006e-05	0.999843	1.19928e-06	5.41888e-05	6.69381e-07	2.92497e-05	4.04227e-07	4.19406e-06	2.99178e-07	3.24346e-06	1.33088e-05
ARHGAP1;51;	7.90872e-06	0.999974	1.98494e-07	1.05711e-05	1.11388e-07	4.11175e-06	7.27167e-08	1.02999e-06	5.19614e-08	6.14824e-07	1.7132e-06
TFAM;124;	0.00524148	0.963834	0.000849994	0.0043234	0.000102429	0.0189152	7.22238e-05	0.00633497	4.22458e-05	0.000149411	0.000135032
TFAM;128;	0.00504406	0.403653	0.00132802	0.00485946	8.23947e-05	0.583853	5.51847e-05	0.000848935	3.1235e-05	8.30957e-05	0.000161847
ARFIP1;9;	0.999708	7.6408e-05	2.88779e-05	1.09235e-06	9.91876e-05	1.92159e-05	6.4835e-07	2.74549e-05	2.47584e-06	2.03007e-06	3.49997e-05
ARFIP1;24;	0.94634	0.0499284	0.000322928	9.23585e-05	0.000331814	0.000885026	1.65342e-05	0.00153051	3.24454e-05	7.24381e-05	0.000447427
ARFIP1;79;	0.000126036	0.000315671	0.000345005	0.00195863	0.00042524	0.00011353	0.0403617	0.932837	0.00461785	0.0187592	0.000140563
ARFIP1;81;	0.000126036	0.000315671	0.000345005	0.00195863	0.00042524	0.00011353	0.0403617	0.932837	0.00461785	0.0187592	0.000140563
ARFIP1;28;	0.579769	0.406814	0.000921373	0.000422022	0.00059113	0.00350813	5.17662e-05	0.0068689	8.05973e-05	0.000210967	0.0007616
EPHA2;897;	0.310354	0.0024844	0.0638461	0.000104976	0.00104607	0.621386	3.38982e-05	0.000288051	6.21036e-05	3.05785e-05	0.000363321
EPHA2;899;	0.201476	0.0018032	0.301869	0.00011742	0.00206371	0.491641	5.39926e-05	0.000431164	0.00010639	3.96003e-05	0.000399431
EPHA2;892;	0.0558486	0.00120578	0.0917308	7.32558e-05	0.000547729	0.850155	2.45197e-05	0.000209689	3.98555e-05	1.79916e-05	0.00014661
SHC1;139;	0.0365466	0.000589672	0.661032	6.88679e-05	0.00162555	0.299527	4.28365e-05	0.000203642	8.64672e-05	2.45407e-05	0.000252847
LMNA;406;	0.000699613	0.000307281	0.837834	0.000340542	0.00042301	0.159329	0.00026953	0.000508936	0.000170692	4.52712e-05	7.22151e-05
LMNA;390;	1.9274e-05	5.56927e-05	4.53649e-05	0.00146825	9.20126e-05	2.26446e-05	0.599239	0.00225427	0.00435392	0.392331	0.000119101
LMNA;392;	4.72996e-06	1.44768e-05	1.86336e-05	0.000914374	2.02101e-05	1.04718e-05	0.986723	0.000267075	0.000821658	0.011179	2.6541e-05
LMNA;395;	4.57348e-06	1.17686e-05	1.41777e-05	0.000363165	2.52432e-05	6.52604e-06	0.957663	0.000375491	0.00157002	0.039936	2.95219e-05
LMNA;428;	0.000330091	9.50408e-05	0.0317819	0.000292924	0.0289285	0.000604559	0.162234	0.00198164	0.771734	0.00135179	0.000664798
LMNA;431;	0.000330091	9.50408e-05	0.0317819	0.000292924	0.0289285	0.000604559	0.162234	0.00198164	0.771734	0.00135179	0.000664798
SART1;463;	0.000279864	1.71632e-05	0.0243036	1.38245e-05	0.95464	0.000122014	0.000518028	0.000184707	0.0195759	7.05213e-05	0.000274533
EDF1;53;	0.00444506	0.00024124	0.462399	5.04551e-05	0.000500266	0.532085	2.95108e-05	8.4348e-05	4.62906e-05	1.30891e-05	0.000106239
EIF2S2;67;	0.00092764	0.759565	0.000272909	0.217717	4.60418e-05	0.0201494	0.000102922	0.000643284	3.59041e-05	0.00027853	0.000261692
RTN4;860;	0.0929339	0.88969	0.000278414	0.000326727	8.69039e-05	0.0157907	1.31524e-05	0.000162114	1.55018e-05	4.60796e-05	0.000656395
RTN4;862;	0.0258261	0.966952	0.000108073	0.000170727	3.14854e-05	0.00658527	5.64956e-06	7.93837e-05	6.19156e-06	2.0046e-05	0.00021547
RTN4;863;	0.0258261	0.966952	0.000108073	0.000170727	3.14854e-05	0.00658527	5.64956e-06	7.93837e-05	6.19156e-06	2.0046e-05	0.00021547
RTN4;107;	0.976731	0.000711237	0.0031752	1.64926e-05	0.000262899	0.0188884	5.25781e-06	5.09314e-05	1.16031e-05	6.77102e-06	0.000139736
RTN4;181;	0.999549	4.69367e-05	9.32974e-05	1.10787e-06	5.46539e-05	0.000195956	4.85418e-07	3.70305e-06	1.4927e-06	8.81873e-07	5.2317e-05
RTN4;182;	0.998628	0.000193727	0.000167795	4.19881e-06	0.00012737	0.000558207	1.54826e-06	9.62044e-06	4.50494e-06	3.27991e-06	0.000301866
RTN4;7;	3.41461e-06	8.10072e-08	2.47944e-05	3.35567e-08	0.999948	3.52525e-07	5.00705e-07	4.95853e-07	1.94942e-05	2.1953e-07	3.0259e-06
RTN4;11;	1.4841e-06	2.74995e-08	5.7367e-06	8.57586e-09	0.999988	7.87859e-08	1.08974e-07	3.38678e-07	3.71577e-06	6.07305e-08	4.46458e-07
RTN4;12;	2.05432e-05	5.5599e-07	0.000174863	2.54782e-07	0.999621	2.73811e-06	3.91557e-06	2.78856e-06	0.000145706	1.59361e-06	2.60501e-05
RTN4;13;	2.6929e-05	7.5285e-07	0.000123904	3.41391e-07	0.999568	3.11118e-06	5.04915e-06	3.19553e-06	0.000206532	2.50586e-06	5.92623e-05
RTN4;15;	3.03809e-06	7.01942e-08	3.19621e-05	2.67487e-08	0.999948	2.76749e-07	4.13061e-07	8.07595e-07	1.45747e-05	1.65622e-07	1.12428e-06
AHNAK;93;	0.005983	0.799912	0.000524046	0.148686	0.000405754	0.00791672	0.000606624	0.00138506	0.000336969	0.00733966	0.0269047
AHNAK;212;	0.974688	0.0241369	7.05343e-05	2.77285e-05	6.6572e-05	0.000519453	3.40407e-06	7.28568e-05	6.48144e-06	1.57761e-05	0.000392345
AHNAK;220;	0.000447726	0.000774929	2.58834e-05	0.000197605	0.0001092	7.60585e-05	4.15353e-05	4.24909e-05	6.84954e-05	0.000979109	0.997237
AHNAK;5851;	0.00751069	0.059799	0.00284928	0.0182602	0.000368981	0.905989	0.000290167	0.000430889	0.00017374	0.000462645	0.00386544
AHNAK;5854;	0.00659429	0.0515768	0.00261286	0.0158524	0.000323212	0.918653	0.000254016	0.00038137	0.000151446	0.000394526	0.0032063
AHNAK;5857;	0.00659429	0.0515768	0.00261286	0.0158524	0.000323212	0.918653	0.000254016	0.00038137	0.000151446	0.000394526	0.0032063
PRKAR1A;83;	2.5224e-05	4.99529e-07	2.26105e-05	1.61175e-07	0.999807	1.15004e-06	1.65929e-06	1.8526e-06	6.47569e-05	1.614e-06	7.34698e-05
RPS6;235;	0.0222087	0.000750923	0.0122255	3.44547e-05	0.000132901	0.964496	8.00792e-06	6.59142e-05	1.1711e-05	6.74131e-06	5.93387e-05
RPS6;236;	0.00275502	0.000222337	0.00134681	9.69932e-06	1.82939e-05	0.995619	1.61628e-06	1.18221e-05	2.05834e-06	1.42522e-06	1.20573e-05
RPS6;240;	0.00980327	0.00183278	0.0217729	0.000100346	0.000144957	0.965937	1.84223e-05	0.000309951	2.01268e-05	1.32735e-05	4.72211e-05
RPS6;242;	0.0426408	0.166284	0.00119715	0.000681819	0.000123719	0.788295	2.50708e-05	0.00020625	2.44879e-05	4.88696e-05	0.000473382
RPS6;244;	0.643514	0.0020984	0.0995941	0.00011605	0.00306926	0.250082	5.37267e-05	0.000309263	0.000124166	4.91796e-05	0.000989858
RPS6;246;	0.753328	0.0020198	0.0569437	0.000102508	0.00263146	0.183457	4.51432e-05	0.000248079	0.000105982	4.47638e-05	0.00107355
RPS6;247;	0.643514	0.0020984	0.0995941	0.00011605	0.00306926	0.250082	5.37267e-05	0.000309263	0.000124166	4.91796e-05	0.000989858
GBF1;1781;	0.00106967	0.000158541	0.945832	0.000143534	0.00164772	0.0500364	0.000264964	0.000143345	0.000365193	5.08163e-05	0.000287804
GBF1;1784;	0.000530116	7.9728e-05	0.96821	6.97698e-05	0.000749093	0.0298572	0.000124589	8.0846e-05	0.000163922	2.30332e-05	0.000111326
DPM1;3;	0.00790077	0.00346564	0.000819127	0.00042043	0.00630702	0.000294538	0.000709574	0.970931	0.00219502	0.00533477	0.00162179
DPM1;7;	0.0126262	0.00546907	0.00101641	0.000526406	0.00698	0.0004035	0.000720428	0.962652	0.00212153	0.00545098	0.00203371
NUCKS1;246;	2.95209e-07	4.95054e-07	1.24153e-06	1.14192e-05	2.68806e-06	4.67788e-07	0.998622	6.93733e-06	0.000384074	0.000966692	3.43781e-06
NUCKS1;195;	0.00119544	0.00608296	0.0106938	0.485374	0.00165611	0.00972271	0.321788	0.130575	0.00934248	0.0225475	0.00102314
NUCKS1;197;	0.00119544	0.00608296	0.0106938	0.485374	0.00165611	0.00972271	0.321788	0.130575	0.00934248	0.0225475	0.00102314
NUCKS1;209;	0.00119544	0.00608296	0.0106938	0.485374	0.00165611	0.00972271	0.321788	0.130575	0.00934248	0.0225475	0.00102314
NUCKS1;213;	0.00119544	0.00608296	0.0106938	0.485374	0.00165611	0.00972271	0.321788	0.130575	0.00934248	0.0225475	0.00102314
NUCKS1;214;	0.00119544	0.00608296	0.0106938	0.485374	0.00165611	0.00972271	0.321788	0.130575	0.00934248	0.0225475	0.00102314
NUCKS1;279;	3.34044e-05	4.42835e-06	0.000293883	4.76018e-06	0.0939042	8.36025e-06	0.000777992	0.00022067	0.904554	0.000117358	8.07565e-05
NUCKS1;79;	1.47282e-05	4.24857e-05	0.000121604	0.00310102	5.48038e-05	6.11791e-05	0.991723	0.000854413	0.00128719	0.00269872	4.08889e-05
NUCKS1;84;	9.14682e-06	2.46235e-05	7.85848e-05	0.0015728	3.70811e-05	3.64609e-05	0.995001	0.000526006	0.00096737	0.00172117	2.61167e-05
SERPINB3;149;	0.000893554	0.000364269	0.000117008	0.000137302	0.00033882	0.000333972	6.00037e-05	3.09489e-05	0.000125493	0.000269613	0.997329
SERPINB3;153;	0.000893554	0.000364269	0.000117008	0.000137302	0.00033882	0.000333972	6.00037e-05	3.09489e-05	0.000125493	0.000269613	0.997329
ADNP;921;	0.00125816	0.217969	0.000401789	0.756292	9.93791e-05	0.0208042	0.000282723	0.000574348	9.42336e-05	0.000939111	0.00128455
PML;518;	0.00116294	9.29408e-05	0.000670922	3.79818e-05	0.928373	5.8007e-05	0.000808816	0.00318594	0.0607679	0.00175798	0.00308362
PML;527;	0.00116294	9.29408e-05	0.000670922	3.79818e-05	0.928373	5.8007e-05	0.000808816	0.00318594	0.0607679	0.00175798	0.00308362
PML;504;	0.910258	0.000859857	0.00137163	4.44076e-05	0.0514548	0.000525215	5.80656e-05	0.000427291	0.000424198	0.000193143	0.0343834
PML;505;	0.181251	0.00072968	0.00261085	6.79529e-05	0.762368	0.000489696	0.000177647	0.00118829	0.00219383	0.00054194	0.0483812
PML;8;	1.81184e-06	6.18242e-06	2.58889e-06	0.000174436	6.83797e-06	1.8205e-06	0.00747231	7.15485e-05	0.000230532	0.992007	2.44486e-05
NOL14;146;	9.7578e-05	0.000780044	0.000223665	0.866355	0.000137337	0.000409675	0.0699279	0.00160968	0.0013554	0.0585292	0.000574794
NOL14;148;	7.2957e-05	0.000605344	0.00021075	0.921764	9.74731e-05	0.000382302	0.0532456	0.00166623	0.000881588	0.020792	0.000281461
NOL14;157;	8.07075e-05	0.000670812	0.00019521	0.899115	0.000110192	0.000358792	0.0570439	0.00153221	0.00105213	0.0394333	0.000408196
NOL14;96;	0.000135228	0.000779439	0.000368955	0.259201	0.000278807	0.000432096	0.536779	0.00400032	0.00437428	0.192866	0.000784568
MAP7;200;	2.69983e-06	4.48752e-06	8.45674e-06	6.0454e-05	2.66589e-05	2.65575e-06	0.969706	0.000225159	0.00434997	0.0255935	2.02108e-05
MAP7;201;	5.69486e-06	3.91079e-06	1.82135e-05	1.65781e-05	0.000231519	3.00224e-06	0.0842287	0.000195522	0.90754	0.00769504	6.19727e-05
MAP7;202;	5.69486e-06	3.91079e-06	1.82135e-05	1.65781e-05	0.000231519	3.00224e-06	0.0842287	0.000195522	0.90754	0.00769504	6.19727e-05
MAP7;209;	1.15249e-07	3.3388e-08	3.57649e-07	6.08422e-08	2.97302e-05	3.38567e-08	3.04295e-05	1.14298e-06	0.999928	8.88994e-06	1.38014e-06
VCP;770;	0.00575945	0.0102811	0.261937	0.0622994	0.00856581	0.0657556	0.126136	0.43002	0.0187761	0.00885315	0.00161603
MFAP1;132;	0.858883	0.0130484	0.00198311	9.41515e-05	0.000213215	0.125246	1.21105e-05	0.000137629	1.89433e-05	2.08817e-05	0.000342203
MFAP1;133;	0.858883	0.0130484	0.00198311	9.41515e-05	0.000213215	0.125246	1.21105e-05	0.000137629	1.89433e-05	2.08817e-05	0.000342203
MFAP1;52;	0.994459	0.00281761	0.000129855	9.73716e-06	2.99688e-05	0.00247062	1.34404e-06	2.27039e-05	2.35593e-06	3.0421e-06	5.42531e-05
MFAP1;53;	0.994459	0.00281761	0.000129855	9.73716e-06	2.99688e-05	0.00247062	1.34404e-06	2.27039e-05	2.35593e-06	3.0421e-06	5.42531e-05
COL18A1;647;	0.523377	0.433866	0.00128611	0.00108909	0.00222179	0.00272417	0.000188558	0.029312	0.000345719	0.00134608	0.00424341
COL18A1;663;	0.523377	0.433866	0.00128611	0.00108909	0.00222179	0.00272417	0.000188558	0.029312	0.000345719	0.00134608	0.00424341
COL18A1;666;	0.523377	0.433866	0.00128611	0.00108909	0.00222179	0.00272417	0.000188558	0.029312	0.000345719	0.00134608	0.00424341
SLK;348;	0.00106407	2.14868e-05	0.931827	7.43285e-06	0.0660636	0.000353526	4.96221e-05	0.000128102	0.000388722	1.3775e-05	8.2547e-05
EEF1D;499;	9.3407e-08	2.79417e-08	1.24407e-06	7.8183e-08	2.08567e-05	6.59268e-08	0.000158348	7.17524e-07	0.999816	2.25077e-06	6.08656e-07
EEF1D;528;	1.20698e-07	3.03488e-08	1.53844e-06	6.4407e-08	4.58895e-05	6.32266e-08	6.8284e-05	1.34815e-06	0.99988	1.91971e-06	5.02833e-07
MLF2;238;	1.01526e-05	2.35788e-05	2.50869e-05	0.000689128	6.05085e-05	1.36775e-05	0.730966	0.000243262	0.00426083	0.263553	0.000154747
MLF2;240;	3.00215e-06	1.84041e-06	1.05936e-05	8.49438e-06	0.000142522	1.85911e-06	0.0387461	3.46458e-05	0.958495	0.00249177	6.43498e-05
CHAF1A;775;	0.450768	0.000637562	0.269057	6.83957e-05	0.269316	0.00588546	0.000141326	0.000947085	0.000881029	0.000112608	0.00218568
CHAF1A;777;	0.0256831	0.000155638	0.625927	2.99752e-05	0.344089	0.00199524	0.000109777	0.000471322	0.00082766	5.50483e-05	0.000655751
CHAF1A;794;	0.0256831	0.000155638	0.625927	2.99752e-05	0.344089	0.00199524	0.000109777	0.000471322	0.00082766	5.50483e-05	0.000655751
CHAF1A;310;	0.000436782	6.63513e-05	0.0316513	9.35107e-05	0.216829	0.000286642	0.0160535	0.00310675	0.730346	0.000674268	0.000456416
CHAF1A;65;	0.00030783	0.997933	1.95033e-05	0.00016955	2.89023e-06	0.00150483	1.64322e-06	4.66105e-05	1.05723e-06	4.4262e-06	8.41475e-06
CHAF1A;71;	0.000448829	0.997653	2.17021e-05	0.000125164	3.24294e-06	0.00168665	1.54874e-06	4.5567e-05	1.07454e-06	4.17358e-06	9.19099e-06
CHAF1A;83;	0.000448829	0.997653	2.17021e-05	0.000125164	3.24294e-06	0.00168665	1.54874e-06	4.5567e-05	1.07454e-06	4.17358e-06	9.19099e-06
SYMPK;1243;	0.00229852	0.0525279	0.000466921	0.317889	0.000827579	0.00170629	0.00494055	0.00450698	0.00192063	0.553328	0.0595872
SYMPK;1259;	0.305863	0.0343531	0.00589474	0.00249587	0.180776	0.00280202	0.00375292	0.131136	0.0221433	0.0550076	0.255774
SH3PXD2B;291;	0.841628	0.0779363	0.00136795	0.00084781	0.00906555	0.00178487	0.00031668	0.0125849	0.000965736	0.00355405	0.0499479
SH3PXD2B;293;	0.841628	0.0779363	0.00136795	0.00084781	0.00906555	0.00178487	0.00031668	0.0125849	0.000965736	0.00355405	0.0499479
SH3PXD2B;769;	4.13625e-05	0.999899	1.11008e-06	1.91531e-05	5.17196e-07	1.21681e-05	2.86957e-07	2.25471e-05	2.13832e-07	1.80642e-06	2.02522e-06
SH3PXD2B;770;	4.13625e-05	0.999899	1.11008e-06	1.91531e-05	5.17196e-07	1.21681e-05	2.86957e-07	2.25471e-05	2.13832e-07	1.80642e-06	2.02522e-06
SH3PXD2B;772;	4.13625e-05	0.999899	1.11008e-06	1.91531e-05	5.17196e-07	1.21681e-05	2.86957e-07	2.25471e-05	2.13832e-07	1.80642e-06	2.02522e-06
DDX47;9;	0.000144664	0.000227547	0.000706802	0.00106033	0.000752971	0.000139482	0.0577346	0.922813	0.00880278	0.00749046	0.000127668
DDX47;14;	2.75552e-06	4.33122e-06	2.05256e-05	6.11209e-05	2.43971e-05	4.39925e-06	0.996649	0.000613162	0.00174928	0.000863703	7.04913e-06
SFRS17A;537;	3.74255e-05	4.86077e-05	0.000116442	0.000117686	0.000192605	2.18847e-05	0.00311582	0.993678	0.00138695	0.00125786	2.68933e-05
PDHA2;331;	0.986809	0.00304651	0.00239565	3.14178e-05	0.000251874	0.00698287	8.19401e-06	0.000366496	1.55029e-05	1.23041e-05	8.05465e-05
PDHA2;333;	0.967038	0.0146918	0.00419754	0.000116305	0.000602522	0.0108241	2.69748e-05	0.00220929	4.69968e-05	4.53531e-05	0.000201324
PDHA2;338;	0.986656	0.00328645	0.00236359	3.29057e-05	0.000256179	0.00689136	8.48998e-06	0.000393737	1.59901e-05	1.28899e-05	8.27266e-05
ESF1;657;	8.00121e-05	7.90571e-05	0.000910872	0.00121277	0.000865557	0.000274954	0.953453	0.000350553	0.036997	0.00489895	0.000876998
ESF1;663;	2.04906e-05	2.23552e-05	0.000210587	0.000394985	0.000222053	6.38514e-05	0.983046	0.000124792	0.0135478	0.0021307	0.00021683
CLASP2;809;	0.995474	0.00421078	2.61976e-05	6.11722e-06	2.09422e-05	0.000165082	8.82577e-07	2.38499e-05	1.74519e-06	3.47098e-06	6.72014e-05
UGCGL1;1277;	9.92496e-05	0.000159151	0.000138644	0.000706646	0.000771363	4.42506e-05	0.0799253	0.0348547	0.0310138	0.851818	0.000469313
DNAJB6;277;	7.40139e-09	5.32472e-07	6.58809e-09	0.999999	1.87215e-09	7.22558e-08	3.12905e-08	4.1584e-08	4.09204e-09	8.74443e-08	1.10802e-08
SLC16A1;483;	0.785399	0.00101675	0.00245962	6.02423e-05	0.185996	0.000594403	0.000104487	0.0011204	0.000912429	0.000322018	0.0220148
SLC16A1;498;	0.12794	0.865002	0.000339445	0.000364032	0.000241099	0.00164548	3.10712e-05	0.00373785	4.2839e-05	0.000159372	0.000496796
SLC16A1;467;	0.000458438	4.7831e-05	5.44745e-05	1.58938e-05	0.00664495	2.04844e-05	7.5859e-05	6.61401e-05	0.00118214	0.00071557	0.990718
SLC16A1;461;	0.00437134	0.000197286	0.000730797	4.82745e-05	0.961434	9.60258e-05	0.000427332	0.00215429	0.0145843	0.00166309	0.0142928
COL4A3BP;501;	0.999819	6.7416e-05	1.21436e-05	6.18879e-07	7.9401e-06	6.84121e-05	1.54287e-07	1.54332e-06	3.81522e-07	3.93585e-07	2.20118e-05
GIPC1;225;	0.00123185	5.20034e-05	0.961668	1.08212e-05	0.00020074	0.0367521	8.77997e-06	3.57844e-05	1.52507e-05	3.45747e-06	2.08665e-05
GIPC1;232;	4.88898e-05	6.97077e-06	0.998463	3.31685e-06	3.21503e-05	0.00141179	4.48513e-06	2.05187e-05	5.45684e-06	9.66505e-07	2.06714e-06
RPL12;38;	0.000138585	1.70117e-05	0.00463743	2.27404e-05	0.251366	7.25582e-05	0.00342931	0.000291218	0.739419	0.000233604	0.000373172
INCENP;148;	0.0017204	0.00191113	0.0544986	0.00594977	0.00492487	0.00539128	0.0499301	0.859175	0.0124541	0.00357458	0.000470118
INCENP;306;	7.69613e-08	3.20978e-08	5.49285e-07	1.18589e-07	8.16921e-06	5.41055e-08	0.000550402	6.57587e-07	0.999431	7.79441e-06	9.66402e-07
INCENP;311;	7.69613e-08	3.20978e-08	5.49285e-07	1.18589e-07	8.16921e-06	5.41055e-08	0.000550402	6.57587e-07	0.999431	7.79441e-06	9.66402e-07
INCENP;312;	7.69613e-08	3.20978e-08	5.49285e-07	1.18589e-07	8.16921e-06	5.41055e-08	0.000550402	6.57587e-07	0.999431	7.79441e-06	9.66402e-07
INCENP;314;	7.69613e-08	3.20978e-08	5.49285e-07	1.18589e-07	8.16921e-06	5.41055e-08	0.000550402	6.57587e-07	0.999431	7.79441e-06	9.66402e-07
INCENP;263;	0.0132211	8.68662e-05	0.945582	1.62137e-05	0.0382968	0.00205861	4.45595e-05	0.000181038	0.000244269	2.1089e-05	0.000246904
INCENP;300;	7.69613e-08	3.20978e-08	5.49285e-07	1.18589e-07	8.16921e-06	5.41055e-08	0.000550402	6.57587e-07	0.999431	7.79441e-06	9.66402e-07
INCENP;302;	7.69613e-08	3.20978e-08	5.49285e-07	1.18589e-07	8.16921e-06	5.41055e-08	0.000550402	6.57587e-07	0.999431	7.79441e-06	9.66402e-07
OSBP;190;	0.997613	0.00147334	4.30948e-05	8.04779e-06	5.64139e-05	0.000240593	1.58606e-06	1.62736e-05	3.79022e-06	6.36314e-06	0.000537175
OSBP;193;	0.997613	0.00147334	4.30948e-05	8.04779e-06	5.64139e-05	0.000240593	1.58606e-06	1.62736e-05	3.79022e-06	6.36314e-06	0.000537175
OSBP;198;	0.997613	0.00147334	4.30948e-05	8.04779e-06	5.64139e-05	0.000240593	1.58606e-06	1.62736e-05	3.79022e-06	6.36314e-06	0.000537175
OSBP;379;	0.813245	0.154459	0.00090459	0.000464237	0.000483947	0.022988	3.8822e-05	0.000287978	6.14115e-05	0.000141242	0.00692661
OSBP;382;	0.813245	0.154459	0.00090459	0.000464237	0.000483947	0.022988	3.8822e-05	0.000287978	6.14115e-05	0.000141242	0.00692661
OSBP;385;	0.813245	0.154459	0.00090459	0.000464237	0.000483947	0.022988	3.8822e-05	0.000287978	6.14115e-05	0.000141242	0.00692661
TOMM22;15;	0.0183583	0.947559	0.000439781	0.000433973	5.30795e-05	0.032528	1.35016e-05	0.000473385	1.1985e-05	3.0495e-05	9.89831e-05
ADAR;648;	2.83708e-05	1.30107e-06	0.999657	4.95032e-07	3.30778e-05	0.000272886	9.64317e-07	1.85115e-06	2.19178e-06	2.55382e-07	1.54389e-06
ADAR;651;	2.83708e-05	1.30107e-06	0.999657	4.95032e-07	3.30778e-05	0.000272886	9.64317e-07	1.85115e-06	2.19178e-06	2.55382e-07	1.54389e-06
EIF4A1;4;	0.00552061	0.060362	0.000669555	0.0233441	0.00221434	0.000930406	0.00469019	0.187737	0.00370807	0.696621	0.0142024
ZFAND5;100;	0.000251139	0.000372848	0.000169818	0.00191138	0.00111857	0.000142665	0.0137453	0.000513336	0.0130819	0.881217	0.0874757
ZFAND5;106;	0.000251139	0.000372848	0.000169818	0.00191138	0.00111857	0.000142665	0.0137453	0.000513336	0.0130819	0.881217	0.0874757
LIMK2;276;	0.00408336	0.000840021	0.00555904	0.000168664	0.000223602	0.988465	3.28846e-05	4.83501e-05	3.93446e-05	2.63333e-05	0.000513698
LIMK2;277;	0.00408336	0.000840021	0.00555904	0.000168664	0.000223602	0.988465	3.28846e-05	4.83501e-05	3.93446e-05	2.63333e-05	0.000513698
ANP32A;17;	0.000180377	0.997513	1.38257e-05	0.0010447	3.34192e-06	0.00117259	3.05482e-06	2.39292e-05	1.68852e-06	1.19797e-05	3.18728e-05
UBR5;1551;	0.0024683	0.00184092	0.766389	0.010705	0.00958699	0.0479536	0.116474	0.0165133	0.0237384	0.00298551	0.00134419
UBR5;286;	0.00465377	0.0101034	0.201505	0.254074	0.00685604	0.20391	0.253328	0.0293598	0.0206258	0.0118756	0.00370892
UBR5;287;	0.00465377	0.0101034	0.201505	0.254074	0.00685604	0.20391	0.253328	0.0293598	0.0206258	0.0118756	0.00370892
UBR5;289;	0.00465377	0.0101034	0.201505	0.254074	0.00685604	0.20391	0.253328	0.0293598	0.0206258	0.0118756	0.00370892
UBR5;327;	3.14427e-06	9.97758e-05	3.84281e-06	0.999404	1.58642e-06	1.33906e-05	8.48375e-05	0.000125933	6.05318e-06	0.000252196	5.17277e-06
NPM3;13;	4.05981e-05	0.000158929	8.99165e-05	0.000189574	2.45841e-05	5.10411e-05	9.9595e-05	0.999228	3.48937e-05	7.64844e-05	6.8809e-06
NPM3;16;	4.87882e-05	0.000212822	0.00010499	0.00027754	2.86383e-05	6.47348e-05	0.000128083	0.998982	4.21966e-05	0.000101325	8.66666e-06
ADSL;9;	0.00020246	6.5259e-06	0.00301902	2.51745e-06	0.995353	2.10394e-05	4.21716e-05	0.000206698	0.00109174	1.47087e-05	4.0074e-05
ADSL;12;	0.00020246	6.5259e-06	0.00301902	2.51745e-06	0.995353	2.10394e-05	4.21716e-05	0.000206698	0.00109174	1.47087e-05	4.0074e-05
ADSL;15;	3.98597e-06	1.91906e-07	2.28548e-05	9.95685e-08	0.999601	4.21073e-07	3.29339e-06	5.0145e-06	0.000358505	1.29184e-06	3.79889e-06
NUP50;221;	0.00217804	0.000282139	0.435138	0.000432161	0.316412	0.00358235	0.0218149	0.00181269	0.213345	0.0012902	0.00371161
NUP50;223;	0.00261956	0.00023123	0.480563	0.00025578	0.430378	0.00340688	0.00661323	0.0010364	0.0703903	0.000702418	0.00380369
SUPT16H;1023;	0.0290055	0.00129636	0.933249	0.000157542	0.00375695	0.0261319	0.000147698	0.00573165	0.000273952	7.36882e-05	0.000175323
HSP90B1;306;	0.012269	0.20555	0.00095768	0.0148723	0.001949	0.00151768	0.00190375	0.705788	0.00167357	0.0482176	0.00530111
GNG5;2;	0.000627058	0.99031	4.67544e-05	0.000510566	6.3846e-06	0.00840156	3.83996e-06	5.55629e-05	2.39833e-06	9.80671e-06	2.57671e-05
GNG5;4;	0.00734072	0.0949448	0.00743767	0.006243	0.000232092	0.878862	0.000168233	0.00432243	9.01389e-05	0.000160025	0.0001988
GNG5;5;	0.000244137	0.997525	1.40437e-05	0.00022094	2.43031e-06	0.00195482	1.46778e-06	1.85049e-05	9.35174e-07	4.42409e-06	1.32373e-05
GNG5;6;	0.000244137	0.997525	1.40437e-05	0.00022094	2.43031e-06	0.00195482	1.46778e-06	1.85049e-05	9.35174e-07	4.42409e-06	1.32373e-05
TOP2B;1550;	9.58215e-06	9.30261e-06	0.000179065	3.84169e-06	8.6279e-07	0.999794	4.42364e-07	1.46044e-06	2.77988e-07	1.94485e-07	5.37965e-07
TOP2B;1552;	0.00128191	0.000375102	0.829138	0.00108376	0.0275465	0.00700783	0.0610989	0.00393458	0.0661302	0.00129442	0.00110918
TOP2B;1576;	0.00210452	0.000710291	0.835222	0.00133137	0.0240647	0.00618718	0.0377311	0.0554518	0.0350916	0.00151388	0.000591983
TOP2B;1581;	0.00479292	0.00171383	0.437071	0.00169894	0.0201122	0.00796777	0.0134058	0.497008	0.0139711	0.0016607	0.000598035
HN1L;30;	1.20322e-07	6.04366e-08	7.51592e-07	2.51223e-07	9.22662e-06	8.29847e-08	0.0028707	1.85759e-06	0.997091	2.4896e-05	1.25534e-06
HN1L;37;	1.20322e-07	6.04366e-08	7.51592e-07	2.51223e-07	9.22662e-06	8.29847e-08	0.0028707	1.85759e-06	0.997091	2.4896e-05	1.25534e-06
DHX36;161;	0.999298	0.000345844	3.653e-05	1.55647e-06	8.97453e-06	0.000291453	2.90988e-07	7.05291e-06	5.67543e-07	6.23078e-07	8.95456e-06
DHX36;167;	0.999283	0.000198779	4.88781e-05	1.39106e-06	1.03889e-05	0.000441062	2.89316e-07	4.85597e-06	5.89104e-07	5.61375e-07	1.06923e-05
AARS;237;	0.0082647	0.975562	0.000133427	0.00281018	0.000137751	0.00181636	5.71129e-05	0.000325265	5.57122e-05	0.000650987	0.0101868
CREB1;143;	0.000736906	0.337637	0.000230563	0.644782	8.19481e-05	0.00188292	0.000383758	0.0117622	0.000103223	0.0021096	0.000289852
CTCF;609;	0.0149571	0.0396131	0.00110099	0.00814728	0.00844079	0.00106632	0.00515122	0.131203	0.00929356	0.71114	0.0698866
CTCF;610;	0.0149571	0.0396131	0.00110099	0.00814728	0.00844079	0.00106632	0.00515122	0.131203	0.00929356	0.71114	0.0698866
CTCF;612;	0.0149571	0.0396131	0.00110099	0.00814728	0.00844079	0.00106632	0.00515122	0.131203	0.00929356	0.71114	0.0698866
NUP107;86;	0.699051	0.0497893	0.0310316	0.000598914	0.00144988	0.211512	0.000107422	0.00566122	0.000149199	0.000134963	0.000514282
PSIP1;129;	0.000693394	0.0369812	0.000233389	0.949837	0.000117177	0.00361042	0.00056918	0.000469064	0.000169061	0.00366544	0.00365439
PSIP1;177;	0.952033	0.0457372	0.000116112	4.78255e-05	8.34091e-05	0.00130599	4.95597e-06	8.51408e-05	8.74064e-06	2.08886e-05	0.000556225
SOX15;37;	0.00026251	0.00736813	0.000105868	0.770425	0.000128615	0.000353701	0.00260479	0.00180818	0.000465688	0.213883	0.00259443
KIF5C;934;	0.00123776	0.000868731	0.000235525	0.000180816	0.00156875	8.17761e-05	0.000394882	0.990874	0.00101477	0.00312526	0.000417808
KIF5C;935;	0.00123776	0.000868731	0.000235525	0.000180816	0.00156875	8.17761e-05	0.000394882	0.990874	0.00101477	0.00312526	0.000417808
GSK3B;278;	0.999495	0.000419675	7.14583e-06	1.20853e-06	7.86164e-06	3.37066e-05	2.2843e-07	4.66363e-06	5.22695e-07	9.00042e-07	2.91776e-05
GSK3B;282;	0.997917	0.00188258	1.81521e-05	3.16495e-06	1.18471e-05	0.000121588	4.72845e-07	1.28809e-05	9.30715e-07	1.64851e-06	2.98096e-05
DSG2;680;	0.000165612	0.00821123	0.000268537	0.979535	2.66638e-05	0.0108863	0.000187514	0.000415729	3.47859e-05	0.000188377	7.9887e-05
EIF3A;584;	0.000115711	5.66717e-06	0.00178044	3.88719e-06	0.992411	3.04875e-05	0.000102171	3.10746e-05	0.00518789	2.70109e-05	0.000304367
EIF3A;881;	5.51036e-05	0.000307233	3.48695e-05	0.000506411	5.25496e-05	2.41795e-05	0.000406977	0.995252	0.000154635	0.00316715	3.89231e-05
UBAP2L;493;	2.08805e-05	2.7494e-06	0.999008	1.51957e-06	1.69855e-05	0.000937052	2.23898e-06	5.54152e-06	2.84531e-06	4.51538e-07	1.24074e-06
UBAP2L;496;	2.08805e-05	2.7494e-06	0.999008	1.51957e-06	1.69855e-05	0.000937052	2.23898e-06	5.54152e-06	2.84531e-06	4.51538e-07	1.24074e-06
UBAP2L;604;	7.82889e-06	1.39929e-05	7.11268e-06	0.000112992	4.37425e-05	4.82289e-06	0.00277814	4.7561e-05	0.00126756	0.994986	0.000730437
UBAP2L;605;	9.61746e-06	1.73913e-05	1.29006e-05	0.000207941	6.35732e-05	7.69218e-06	0.018189	8.6226e-05	0.00327803	0.977628	0.000499501
UBAP2L;607;	7.64696e-06	1.38771e-05	9.16864e-06	0.00014983	4.82497e-05	5.67096e-06	0.00887038	6.27589e-05	0.00213496	0.988238	0.00045981
UBAP2L;608;	9.61746e-06	1.73913e-05	1.29006e-05	0.000207941	6.35732e-05	7.69218e-06	0.018189	8.6226e-05	0.00327803	0.977628	0.000499501
UBAP2L;609;	4.08333e-05	7.33325e-05	3.20582e-05	0.000535174	0.000188081	2.55007e-05	0.0059134	0.000149476	0.0033931	0.983153	0.0064964
UBAP2L;453;	1.81966e-05	7.38072e-06	2.76104e-05	1.39749e-05	0.00153788	4.55611e-06	0.00361269	0.000198511	0.985944	0.00821189	0.000423462
UBAP2L;454;	0.00340531	0.000876303	0.00133007	0.000584512	0.169528	0.000285854	0.0133673	0.0166078	0.520979	0.195666	0.0773699
UBAP2L;458;	1.81966e-05	7.38072e-06	2.76104e-05	1.39749e-05	0.00153788	4.55611e-06	0.00361269	0.000198511	0.985944	0.00821189	0.000423462
UBAP2L;460;	8.35985e-06	6.93209e-06	2.70976e-05	4.09233e-05	0.000242379	5.52868e-06	0.473699	0.000211385	0.50256	0.023076	0.000121946
UBAP2L;470;	4.86349e-06	4.74445e-06	3.50706e-05	3.32016e-05	9.32123e-05	4.90178e-06	0.973639	0.000824769	0.0239551	0.0013903	1.49762e-05
UBAP2L;475;	8.35985e-06	6.93209e-06	2.70976e-05	4.09233e-05	0.000242379	5.52868e-06	0.473699	0.000211385	0.50256	0.023076	0.000121946
UBAP2L;476;	8.35985e-06	6.93209e-06	2.70976e-05	4.09233e-05	0.000242379	5.52868e-06	0.473699	0.000211385	0.50256	0.023076	0.000121946
UBAP2L;477;	6.24077e-06	7.60644e-06	2.14928e-05	6.12884e-05	9.51465e-05	4.8954e-06	0.947259	0.000657635	0.030159	0.0216884	3.95991e-05
TTLL12;15;	7.84136e-05	1.25212e-05	0.00117581	1.5321e-05	0.0708068	2.63971e-05	0.00317026	0.00107187	0.923252	0.000272859	0.000118128
TTLL12;16;	7.02243e-05	5.84356e-06	0.000840054	4.57132e-06	0.92502	1.41019e-05	0.000333013	0.000230387	0.0733253	6.56849e-05	9.08838e-05
NT5C2;511;	0.00012702	3.66397e-05	0.991889	4.50738e-05	0.000183962	0.00741766	9.08156e-05	0.000109687	7.2107e-05	1.08732e-05	1.75965e-05
DPYSL3;102;	4.59196e-05	1.87421e-05	0.000358607	4.26743e-05	0.00368109	2.21369e-05	0.0389659	0.00523111	0.949921	0.00161822	9.45043e-05
ATP5F1;142;	1.30878e-05	0.999982	1.18048e-07	1.30703e-06	6.55013e-08	2.34487e-06	2.24518e-08	4.90395e-07	2.06628e-08	1.53983e-07	6.99101e-07
CDC2L5;400;	0.000793189	0.00206885	0.00819943	0.0262579	0.00194771	0.00256229	0.25231	0.678796	0.0129177	0.0136373	0.000509107
CCDC88C;1598;	6.99584e-05	0.000264544	0.000169604	0.00940929	0.000236083	9.67062e-05	0.610361	0.0157288	0.00626293	0.357133	0.000268203
CCDC88C;1599;	6.99584e-05	0.000264544	0.000169604	0.00940929	0.000236083	9.67062e-05	0.610361	0.0157288	0.00626293	0.357133	0.000268203
MID1;90;	0.000292166	0.00206647	4.81119e-05	0.00238893	0.000215305	6.43831e-05	0.000796969	0.00347289	0.000602641	0.986092	0.00396023
MID1;92;	3.86544e-05	0.000267836	1.35152e-05	0.000974545	4.57041e-05	1.41315e-05	0.000625841	0.00279816	0.000242716	0.994727	0.000252051
MID1;96;	3.86544e-05	0.000267836	1.35152e-05	0.000974545	4.57041e-05	1.41315e-05	0.000625841	0.00279816	0.000242716	0.994727	0.000252051
MID1;98;	5.70888e-05	0.000485669	3.46085e-05	0.00596234	7.27021e-05	3.68258e-05	0.0032715	0.00924794	0.000527864	0.980055	0.000248053
ZMYM3;258;	0.000115577	1.05993e-05	0.0004558	9.54433e-06	0.752866	2.30476e-05	0.00059137	9.14991e-05	0.244188	0.000229476	0.00141862
ZMYM3;261;	0.000115577	1.05993e-05	0.0004558	9.54433e-06	0.752866	2.30476e-05	0.00059137	9.14991e-05	0.244188	0.000229476	0.00141862
ZMYM3;265;	0.000115577	1.05993e-05	0.0004558	9.54433e-06	0.752866	2.30476e-05	0.00059137	9.14991e-05	0.244188	0.000229476	0.00141862
ZMYM3;269;	0.000115577	1.05993e-05	0.0004558	9.54433e-06	0.752866	2.30476e-05	0.00059137	9.14991e-05	0.244188	0.000229476	0.00141862
ZMYM3;213;	9.6235e-06	2.41519e-05	2.78768e-06	5.80605e-05	2.17289e-05	2.59143e-06	0.000125768	5.20512e-05	0.000135059	0.998648	0.000919953
ZMYM3;214;	9.6235e-06	2.41519e-05	2.78768e-06	5.80605e-05	2.17289e-05	2.59143e-06	0.000125768	5.20512e-05	0.000135059	0.998648	0.000919953
ZMYM3;466;	0.0033316	0.642189	0.00109708	0.184404	0.000335706	0.00609074	0.00102691	0.156721	0.000341376	0.00385345	0.000609474
CTTN;405;	0.00380717	0.985977	7.57357e-05	0.00282599	0.000115063	0.000471907	6.53805e-05	0.000903287	6.09202e-05	0.00154197	0.00415602
CTTN;417;	0.00225079	2.17508e-05	0.992546	4.21969e-06	0.0043991	0.000616622	1.10772e-05	6.18365e-05	4.98814e-05	4.59076e-06	3.38101e-05
CTTN;418;	0.00225079	2.17508e-05	0.992546	4.21969e-06	0.0043991	0.000616622	1.10772e-05	6.18365e-05	4.98814e-05	4.59076e-06	3.38101e-05
TP53BP1;1435;	6.58554e-05	6.82995e-06	0.000273178	5.66884e-06	0.54711	1.04059e-05	0.000507363	0.000232942	0.451389	0.000179123	0.000219696
TP53BP1;1440;	3.55575e-06	1.00286e-06	9.02089e-05	2.67848e-06	0.000753325	2.98562e-06	0.00428909	3.71247e-05	0.994766	4.20485e-05	1.17861e-05
TP53BP1;1442;	3.55575e-06	1.00286e-06	9.02089e-05	2.67848e-06	0.000753325	2.98562e-06	0.00428909	3.71247e-05	0.994766	4.20485e-05	1.17861e-05
TP53BP1;1213;	6.60967e-06	4.4524e-06	5.64726e-05	2.24148e-05	0.000254506	5.65936e-06	0.666415	0.000513121	0.331608	0.00108955	2.44972e-05
TP53BP1;1221;	6.60967e-06	4.4524e-06	5.64726e-05	2.24148e-05	0.000254506	5.65936e-06	0.666415	0.000513121	0.331608	0.00108955	2.44972e-05
TP53BP1;1224;	6.60967e-06	4.4524e-06	5.64726e-05	2.24148e-05	0.000254506	5.65936e-06	0.666415	0.000513121	0.331608	0.00108955	2.44972e-05
TP53BP1;528;	3.59349e-07	1.04497e-08	2.49974e-06	4.70304e-09	0.999991	3.7429e-08	9.13478e-08	9.06012e-08	5.12889e-06	3.82019e-08	3.66093e-07
TP53BP1;530;	2.16477e-06	5.86322e-08	1.32523e-05	2.59568e-08	0.99996	2.30803e-07	4.36913e-07	3.65163e-07	2.07797e-05	1.9531e-07	2.76434e-06
TP53BP1;403;	0.107685	0.000773411	0.832916	8.81448e-05	0.0462013	0.00652303	0.00017144	0.00438823	0.000689778	0.000102813	0.000460454
TP53BP1;640;	0.00091215	7.85602e-05	0.123928	8.40628e-05	0.754972	0.000682456	0.00415604	0.0007492	0.112882	0.000371152	0.00118382
TP53BP1;644;	0.00091215	7.85602e-05	0.123928	8.40628e-05	0.754972	0.000682456	0.00415604	0.0007492	0.112882	0.000371152	0.00118382
TP53BP1;645;	0.00091215	7.85602e-05	0.123928	8.40628e-05	0.754972	0.000682456	0.00415604	0.0007492	0.112882	0.000371152	0.00118382
SMARCA4;610;	0.203928	0.000363127	0.0745602	4.51696e-05	0.713836	0.0022955	0.000118155	0.000551564	0.000984903	0.000104254	0.00321377
SMARCA4;613;	0.249022	0.000416649	0.0907016	5.05287e-05	0.651868	0.00275666	0.000127219	0.000617251	0.0010189	0.000111503	0.00330977
SMARCA4;1453;	0.99839	0.00139275	2.02815e-05	3.8825e-06	2.98926e-05	5.74669e-05	8.49464e-07	3.21272e-05	2.027e-06	3.77994e-06	6.72509e-05
SMARCA4;1454;	0.99839	0.00139275	2.02815e-05	3.8825e-06	2.98926e-05	5.74669e-05	8.49464e-07	3.21272e-05	2.027e-06	3.77994e-06	6.72509e-05
SMARCA4;1459;	0.99839	0.00139275	2.02815e-05	3.8825e-06	2.98926e-05	5.74669e-05	8.49464e-07	3.21272e-05	2.027e-06	3.77994e-06	6.72509e-05
SMARCA4;1380;	0.492843	0.495081	0.000537215	0.000510004	0.000786203	0.0017447	6.58859e-05	0.00533493	0.000116032	0.00046403	0.00251651
SMARCA4;1382;	0.583986	0.33303	0.00235698	0.00119714	0.00278954	0.00422859	0.00023363	0.0679604	0.000410177	0.00116948	0.00263808
SMARCA4;1484;	0.999558	6.98335e-05	2.64151e-05	1.24211e-06	0.00017446	1.89074e-05	8.1307e-07	1.77192e-05	3.59356e-06	2.95591e-06	0.000126399
SMARCA4;695;	0.769935	0.221006	0.000277805	0.000244088	0.000338834	0.00225459	2.40601e-05	0.00035805	4.31437e-05	0.000147156	0.00537138
SMARCA4;699;	0.917118	0.0634019	0.000418319	0.000237136	0.000519416	0.00370981	2.92161e-05	0.000239558	5.72415e-05	0.000150367	0.0141194
RTKN;218;	0.0459351	0.0109455	0.0893861	0.0101259	0.0540301	0.15418	0.010758	0.0025328	0.0194837	0.00811807	0.594504
RTKN;219;	0.0459351	0.0109455	0.0893861	0.0101259	0.0540301	0.15418	0.010758	0.0025328	0.0194837	0.00811807	0.594504
RTKN;220;	0.00785476	0.0024266	0.488085	0.00385406	0.00993651	0.469729	0.00474444	0.00123095	0.00446954	0.00101633	0.00665289
TACC2;2134;	0.000440577	3.23714e-06	0.000772948	6.50392e-07	0.998638	1.10205e-05	4.10438e-06	2.15172e-05	6.97432e-05	2.92512e-06	3.48158e-05
TACC2;2317;	8.32499e-07	2.97668e-08	2.82905e-06	1.24786e-08	0.999972	6.0103e-08	2.85751e-07	6.16331e-07	2.20587e-05	1.53997e-07	6.59986e-07
TACC2;2321;	8.32499e-07	2.97668e-08	2.82905e-06	1.24786e-08	0.999972	6.0103e-08	2.85751e-07	6.16331e-07	2.20587e-05	1.53997e-07	6.59986e-07
TACC2;2226;	5.27611e-05	1.80769e-06	0.00061439	7.45289e-07	0.998712	5.37209e-06	1.47064e-05	5.31595e-05	0.000524256	5.22654e-06	1.5126e-05
TMPO;59;	0.00116995	0.0408835	0.000434061	0.031584	0.000278041	0.000857916	0.00121075	0.915088	0.000409755	0.00769496	0.000388969
TRAF2;5;	0.0162076	0.963343	0.000280585	0.00214664	0.000126938	0.0137156	4.13763e-05	0.000208817	3.88808e-05	0.000200995	0.00368993
TRAF2;11;	0.0589014	0.218335	0.00136711	0.000627077	0.000130734	0.719886	2.47412e-05	0.000266683	2.45614e-05	4.75001e-05	0.000389355
SAPS3;634;	4.29926e-05	2.26041e-05	4.38215e-05	1.08352e-05	0.000170982	6.82387e-06	7.24119e-05	0.999332	0.000174194	0.000111481	1.18513e-05
FLII;856;	6.25032e-07	2.8603e-08	3.20037e-06	1.56424e-08	0.999925	7.0151e-08	5.09932e-07	4.13723e-07	6.92181e-05	2.10483e-07	1.10578e-06
FLII;860;	8.9584e-07	3.97976e-08	3.7198e-06	1.98501e-08	0.99992	8.34383e-08	6.02027e-07	7.8314e-07	7.21482e-05	2.80916e-07	1.1367e-06
EIF1B;9;	0.000393931	0.000380526	0.00560742	0.00187754	0.00411674	0.000542691	0.613379	0.284551	0.079437	0.00935381	0.000360665
DNMT1;205;	0.479088	0.000724943	0.47952	6.04612e-05	0.0235368	0.0152486	7.42804e-05	0.000686608	0.000285699	5.53276e-05	0.000719816
DNMT1;216;	0.267892	0.000762679	0.695032	6.11666e-05	0.00888491	0.0260063	6.07289e-05	0.000679021	0.000185784	4.18693e-05	0.000393127
DNMT1;203;	0.124409	0.00091305	0.814427	7.22089e-05	0.00348046	0.055502	5.48505e-05	0.000745502	0.000128859	3.50679e-05	0.000231546
DDI2;194;	0.00111325	0.000103003	0.579562	0.000108849	0.350034	0.00110737	0.00460415	0.00144999	0.060885	0.000338286	0.000694629
POLR2A;1912;	1.29077e-07	4.83456e-09	5.4011e-07	2.26913e-09	0.999993	1.14147e-08	5.80674e-08	7.07576e-08	5.60019e-06	2.79056e-08	1.60836e-07
POLR2A;1919;	1.29077e-07	4.83456e-09	5.4011e-07	2.26913e-09	0.999993	1.14147e-08	5.80674e-08	7.07576e-08	5.60019e-06	2.79056e-08	1.60836e-07
POLR2A;1922;	2.38354e-06	8.90464e-08	1.39276e-05	3.9628e-08	0.999912	2.13519e-07	9.70596e-07	2.07726e-06	6.6304e-05	4.11063e-07	1.47954e-06
YBX1;209;	0.55927	0.358247	0.00214842	0.000430833	0.00028988	0.0779915	3.17236e-05	0.00108158	3.9286e-05	6.85532e-05	0.000401277
FARSA;301;	0.00176567	0.864751	0.000688433	0.0832278	7.68858e-05	0.0465953	0.000142167	0.00222422	5.21022e-05	0.000273693	0.000202928
EMD;171;	4.36355e-07	3.74447e-07	6.91003e-06	4.34139e-06	8.64057e-06	1.00425e-06	0.998027	6.5578e-06	0.00190217	4.03332e-05	2.46416e-06
TRIP12;354;	0.00425102	0.981939	0.000120749	0.00125002	9.69047e-05	0.000505799	4.82793e-05	0.0110606	4.19177e-05	0.000414764	0.000270922
ST13;75;	3.98613e-05	5.67952e-06	0.000694652	8.52326e-06	0.0546718	1.97982e-05	0.00165782	7.62489e-05	0.942482	0.000127072	0.000217014
ST13;76;	1.36118e-05	1.91508e-06	0.00019262	2.4838e-06	0.0318057	4.8161e-06	0.00055703	6.0722e-05	0.96727	4.90937e-05	4.1822e-05
ST13;79;	1.78368e-05	2.26914e-06	0.000180613	2.62311e-06	0.0703069	5.10677e-06	0.000454972	6.61868e-05	0.928841	5.99235e-05	6.21084e-05
ANLN;793;	0.000242118	0.984923	2.7119e-05	0.0132196	1.32071e-05	0.000266673	2.68646e-05	0.000956576	1.14106e-05	0.000238664	7.4704e-05
MYLC2B;25;	0.000334016	0.99888	1.69664e-05	0.000197579	4.79088e-06	0.000224823	2.95465e-06	0.000314405	1.98182e-06	1.17999e-05	1.09808e-05
ANAPC1;372;	0.000391344	5.15639e-05	0.000389228	3.95828e-05	0.331144	4.25304e-05	0.00192769	0.000686735	0.652487	0.00362308	0.00921695
ANAPC1;377;	0.000391344	5.15639e-05	0.000389228	3.95828e-05	0.331144	4.25304e-05	0.00192769	0.000686735	0.652487	0.00362308	0.00921695
UPF1;1107;	0.000802582	0.522272	0.000316643	0.45977	5.05641e-05	0.0147375	0.000147187	0.00128903	4.46309e-05	0.000363686	0.00020677
UPF1;1110;	0.000802582	0.522272	0.000316643	0.45977	5.05641e-05	0.0147375	0.000147187	0.00128903	4.46309e-05	0.000363686	0.00020677
KIAA1429;173;	0.000852428	1.29847e-05	0.000148235	2.82315e-06	0.995511	1.49792e-05	1.84833e-05	4.07611e-05	0.000527389	3.69035e-05	0.00283369
KIAA1429;1575;	0.000384999	3.41532e-06	0.000642735	8.34533e-07	0.998707	1.54e-05	5.29396e-06	9.87027e-06	9.82929e-05	3.82984e-06	0.000128693
KIAA1429;1578;	0.000384999	3.41532e-06	0.000642735	8.34533e-07	0.998707	1.54e-05	5.29396e-06	9.87027e-06	9.82929e-05	3.82984e-06	0.000128693
KIAA1429;1579;	0.00040202	2.89346e-06	0.000399743	6.24383e-07	0.999002	1.09026e-05	3.66186e-06	8.81241e-06	6.7259e-05	3.00528e-06	9.90306e-05
FMNL2;171;	0.000426127	0.000187512	8.24118e-05	0.000131671	0.00281431	4.6245e-05	0.000664032	0.000300184	0.00504057	0.0347223	0.955585
RSRC1;48;	9.70362e-06	0.000318394	6.95198e-06	0.999155	3.3709e-06	5.77165e-05	5.91259e-05	2.35328e-05	8.76665e-06	0.000305029	5.22992e-05
RSRC1;50;	9.70362e-06	0.000318394	6.95198e-06	0.999155	3.3709e-06	5.77165e-05	5.91259e-05	2.35328e-05	8.76665e-06	0.000305029	5.22992e-05
RSRC1;52;	9.70362e-06	0.000318394	6.95198e-06	0.999155	3.3709e-06	5.77165e-05	5.91259e-05	2.35328e-05	8.76665e-06	0.000305029	5.22992e-05
SPEN;1268;	0.022398	0.0155482	0.37283	0.00314495	0.00230208	0.549843	0.000828099	0.0316636	0.000623936	0.000380033	0.000438737
SPEN;1278;	0.00493204	0.00867914	0.282418	0.0918275	0.00941459	0.0753612	0.300542	0.184353	0.0286348	0.0117207	0.00211683
WDR43;474;	4.50804e-05	1.59285e-05	0.000854426	6.27623e-05	0.00380091	6.07346e-05	0.0730601	0.000153526	0.920776	0.000762436	0.000408507
WDR43;480;	2.60936e-05	1.1045e-05	0.000495792	5.29491e-05	0.00171276	3.82331e-05	0.172932	0.000135746	0.823701	0.000689321	0.000205697
CCBL2;277;	0.999817	9.84648e-05	1.81582e-05	7.4037e-07	1.73468e-05	2.31683e-05	2.68115e-07	1.52494e-05	7.27055e-07	7.19237e-07	7.70117e-06
CCBL2;116;	0.00121493	0.000526547	0.000543036	0.000523519	0.0315025	0.00015113	0.0142434	0.00824875	0.309377	0.584821	0.0488485
CCBL2;124;	0.00121493	0.000526547	0.000543036	0.000523519	0.0315025	0.00015113	0.0142434	0.00824875	0.309377	0.584821	0.0488485
CCBL2;88;	2.33083e-07	6.20808e-06	3.01242e-07	0.999955	1.27828e-07	1.25394e-06	8.25039e-06	3.64947e-06	5.29715e-07	2.33858e-05	6.27517e-07
CDCA5;209;	6.12824e-05	4.06497e-05	0.00297149	0.000277532	0.00127826	0.000165605	0.932418	0.00196685	0.059795	0.000922647	0.00010231
MED30;2;	2.76618e-06	4.54418e-07	2.58683e-05	7.03221e-07	0.00355147	1.09222e-06	0.00019157	7.57132e-06	0.996178	1.88365e-05	2.16076e-05
ZNF828;427;	0.288511	0.00412127	0.130201	0.000851543	0.262715	0.0470673	0.00134574	0.00138564	0.00670905	0.00135082	0.255742
ZNF828;626;	0.00566977	0.230619	0.00101074	0.640133	0.000872483	0.0104669	0.00251425	0.00246774	0.0010973	0.0339459	0.0712028
ZNF828;627;	0.00155937	0.691105	0.000173812	0.290172	0.000146782	0.00156909	0.000402799	0.00194569	0.000169011	0.00887323	0.0038837
ZNF828;632;	0.00155937	0.691105	0.000173812	0.290172	0.000146782	0.00156909	0.000402799	0.00194569	0.000169011	0.00887323	0.0038837
ZNF828;633;	0.00155937	0.691105	0.000173812	0.290172	0.000146782	0.00156909	0.000402799	0.00194569	0.000169011	0.00887323	0.0038837
ZNF828;634;	0.00155937	0.691105	0.000173812	0.290172	0.000146782	0.00156909	0.000402799	0.00194569	0.000169011	0.00887323	0.0038837
ZNF828;476;	0.000547995	0.175503	0.000127209	0.818156	4.8708e-05	0.00317239	0.000164053	0.000392438	5.33987e-05	0.00098766	0.000847289
ZNF828;432;	5.12913e-06	6.89513e-06	5.2972e-06	6.3397e-06	1.35159e-05	1.41751e-06	3.50347e-05	0.99981	3.45523e-05	7.96038e-05	2.54389e-06
ZNF828;443;	0.999958	9.10809e-06	5.61623e-06	1.33392e-07	4.22102e-06	1.57115e-05	4.76559e-08	4.72027e-07	1.38319e-07	1.05963e-07	6.00242e-06
ZNF828;282;	1.74429e-06	4.66342e-07	4.0223e-06	7.84668e-07	0.000450416	4.62984e-07	0.000212317	8.35351e-06	0.99915	0.000127956	4.34313e-05
ZNF828;284;	8.59131e-06	2.53599e-06	1.52273e-05	3.76795e-06	0.0015874	1.83499e-06	0.000835854	8.98607e-05	0.996377	0.000954729	0.000122931
ZNF828;286;	9.14845e-07	1.80025e-07	2.95078e-06	2.53536e-07	0.000677222	2.27794e-07	5.95196e-05	3.79413e-06	0.999222	2.03036e-05	1.27207e-05
ZNF828;297;	2.12803e-06	5.11753e-07	4.90157e-06	7.27684e-07	0.000777871	4.72334e-07	0.000172955	1.54825e-05	0.998891	0.000105354	2.82209e-05
ZNF828;217;	0.0108494	0.000907847	0.00144093	0.000265133	0.53189	0.000328933	0.00201526	0.00455246	0.0548494	0.017149	0.375752
ZNF828;145;	9.22716e-07	5.30106e-06	5.25823e-07	5.61497e-05	1.65156e-06	5.11709e-07	8.28058e-05	4.93182e-05	1.66443e-05	0.999776	9.71966e-06
ZNF828;181;	0.000207204	0.00118092	0.000272765	0.0243004	0.000409846	0.000201425	0.0770241	0.11525	0.0047916	0.775796	0.000565908
ZNF828;183;	0.000207204	0.00118092	0.000272765	0.0243004	0.000409846	0.000201425	0.0770241	0.11525	0.0047916	0.775796	0.000565908
ZNF828;184;	0.000207204	0.00118092	0.000272765	0.0243004	0.000409846	0.000201425	0.0770241	0.11525	0.0047916	0.775796	0.000565908
ZNF828;344;	3.73219e-05	0.000133863	9.0898e-05	0.00529173	0.000137423	5.26102e-05	0.640384	0.00520241	0.00442906	0.344058	0.000183379
ZNF828;353;	1.52705e-05	1.7981e-05	7.25864e-05	0.000129055	0.000219027	1.32295e-05	0.950616	0.00406669	0.0346413	0.010159	5.01718e-05
ZNF828;355;	1.05355e-07	1.55889e-07	5.45213e-07	2.25341e-06	1.19037e-06	1.35397e-07	0.999598	9.60522e-06	0.000226355	0.000161474	5.48794e-07
ZNF828;364;	0.00015388	0.000169063	0.0011936	0.000949782	0.001766	0.000160387	0.785541	0.125446	0.0713263	0.0130738	0.000220627
ZNF828;308;	0.000457635	3.75689e-05	0.000313883	1.9822e-05	0.908803	3.11205e-05	0.000530838	0.000429673	0.0816126	0.00109059	0.0066731
ZNF828;311;	0.000548608	4.83893e-05	0.000379596	2.66721e-05	0.866525	3.93912e-05	0.000746355	0.000539455	0.120096	0.00159829	0.00945273
ZNF828;319;	0.000357556	3.02343e-05	0.000285388	1.67794e-05	0.897761	2.62875e-05	0.000508919	0.000385042	0.0951219	0.000915939	0.00459105
ZNF828;572;	0.000252397	0.00910623	0.000489927	0.975372	7.01045e-05	0.00295467	0.00102172	0.00955105	0.000132522	0.000946661	0.000102342
ZNF828;471;	0.0014058	0.269459	0.000257762	0.714854	0.000138077	0.00459289	0.000420736	0.000804986	0.00015481	0.00374532	0.0041661
ZNF828;472;	0.0014058	0.269459	0.000257762	0.714854	0.000138077	0.00459289	0.000420736	0.000804986	0.00015481	0.00374532	0.0041661
ARHGAP17;553;	4.18457e-05	4.84431e-06	0.000169106	4.94691e-06	0.192131	8.70596e-06	0.000506602	6.79081e-05	0.806467	0.000170375	0.000427289
ARHGAP17;560;	4.18457e-05	4.84431e-06	0.000169106	4.94691e-06	0.192131	8.70596e-06	0.000506602	6.79081e-05	0.806467	0.000170375	0.000427289
ARHGAP17;561;	4.18457e-05	4.84431e-06	0.000169106	4.94691e-06	0.192131	8.70596e-06	0.000506602	6.79081e-05	0.806467	0.000170375	0.000427289
ARHGAP17;575;	2.28219e-07	4.26854e-08	1.21428e-06	6.22956e-08	0.000237442	6.65363e-08	1.971e-05	1.21794e-06	0.999735	3.19988e-06	1.74095e-06
ARHGAP17;674;	1.03788e-05	7.07711e-06	2.76806e-05	2.6687e-05	0.000410386	4.77241e-06	0.0649473	0.000384179	0.916631	0.0174349	0.000116019
ARHGAP17;676;	3.61801e-05	3.10664e-05	6.70056e-05	0.000134802	0.000881414	1.63826e-05	0.143149	0.000992209	0.49025	0.363771	0.000671362
ASPSCR1;594;	0.000273704	9.55572e-06	0.0281962	4.81952e-06	0.969185	6.66253e-05	8.87674e-05	0.000127526	0.00194826	1.937e-05	7.96498e-05
ASPSCR1;596;	0.000378081	7.24298e-06	0.0189581	2.64353e-06	0.979955	5.59631e-05	2.7981e-05	5.29976e-05	0.000481099	9.18554e-06	7.15149e-05
LRWD1;212;	6.95838e-06	1.40785e-05	8.7107e-05	0.000467942	3.70235e-05	2.59917e-05	0.997028	0.000530735	0.00109181	0.000694672	1.53882e-05
LRWD1;241;	3.65805e-06	8.74196e-06	2.10598e-05	0.00054293	1.81017e-05	1.17491e-05	0.996332	6.89772e-05	0.000743346	0.00222274	2.69362e-05
LRWD1;243;	1.90214e-06	5.21351e-06	9.74359e-06	0.00029157	8.92342e-06	4.72844e-06	0.997166	0.000117564	0.000381484	0.00200423	8.75748e-06
LRWD1;245;	3.90356e-05	0.000156206	0.000191895	0.0243838	0.000110677	0.000148234	0.952093	0.00172865	0.00226509	0.0187318	0.000151709
RPL14;139;	2.05719e-06	1.27871e-06	1.61578e-05	7.84837e-06	9.40745e-05	2.10561e-06	0.439051	2.78474e-05	0.560312	0.000463925	2.19027e-05
BAZ1B;1342;	0.0407425	0.000539053	0.00410212	0.000102847	0.361663	0.00101815	0.000295744	0.000364659	0.00332464	0.000597614	0.58725
BAZ1B;347;	3.01175e-06	8.38353e-06	1.08929e-05	0.000418345	1.46635e-05	5.79701e-06	0.985992	0.00014746	0.00075323	0.0126256	2.08434e-05
BAZ1B;349;	3.98121e-05	0.000177595	2.49517e-05	0.00330484	7.13281e-05	3.58691e-05	0.00280927	0.000174766	0.000641802	0.989953	0.00276697
OGDH;457;	1.39341e-07	1.55215e-07	6.94376e-07	1.86937e-06	2.38349e-06	1.70579e-07	0.998464	3.08086e-06	0.00129893	0.000226843	1.66116e-06
ZC3H7B;239;	0.0459976	0.0355562	0.00198482	0.000898892	0.00269504	0.0015132	0.000353044	0.907965	0.000596503	0.00144139	0.000998393
CAND1;381;	0.00123907	0.000279504	0.909115	0.000645981	0.0264819	0.00737655	0.0192456	0.00154384	0.032122	0.000735284	0.00121488
NSFL1C;140;	1.38868e-05	1.96178e-05	5.9958e-05	0.000173723	0.00015317	1.30684e-05	0.96473	0.00412619	0.0170014	0.0136629	4.62733e-05
HSPBP1;236;	0.00122538	0.0011864	0.000332367	0.000470524	0.00277305	0.000119293	0.00164298	0.96335	0.00398203	0.0238282	0.00109019
HSPBP1;353;	9.52098e-06	0.999977	1.88484e-07	4.01799e-06	7.45758e-08	7.25774e-06	3.62327e-08	4.86018e-07	2.77679e-08	2.03875e-07	8.72857e-07
HSPBP1;354;	9.52098e-06	0.999977	1.88484e-07	4.01799e-06	7.45758e-08	7.25774e-06	3.62327e-08	4.86018e-07	2.77679e-08	2.03875e-07	8.72857e-07
HSPBP1;359;	3.32409e-06	0.999969	1.73701e-07	1.96463e-05	6.29169e-08	5.52695e-06	5.97129e-08	8.72306e-07	3.39544e-08	3.57821e-07	5.91303e-07
NSUN5;327;	0.0075503	5.89947e-05	0.0407482	1.13157e-05	0.949811	0.000271516	6.07756e-05	0.00051649	0.000687767	3.51205e-05	0.00024857
RBM15;622;	2.89724e-05	0.000449003	2.97333e-05	0.987502	2.12295e-05	0.000104833	0.00140615	0.000179782	0.000108278	0.0099206	0.000249442
RBM15;109;	5.46066e-07	1.38955e-05	7.66282e-07	0.999954	2.29035e-07	6.3275e-06	7.10975e-06	2.29444e-06	6.76349e-07	1.21699e-05	1.56577e-06
RBM15;670;	1.12779e-06	2.6255e-05	1.26521e-06	0.999709	6.69192e-07	5.11639e-06	4.32703e-05	1.17835e-05	2.97738e-06	0.000193831	4.77357e-06
RBM15;674;	2.06018e-06	4.19301e-05	2.45617e-06	0.999472	1.29586e-06	9.95271e-06	8.90406e-05	1.7986e-05	5.95056e-06	0.000347225	9.89534e-06
RBM15;678;	1.6918e-06	3.68712e-05	1.93905e-06	0.999514	1.05359e-06	7.49501e-06	7.4074e-05	1.79353e-05	4.88769e-06	0.000332423	7.53806e-06
RBM15;656;	2.95169e-06	6.88167e-05	3.19723e-06	0.998829	1.88391e-06	1.05529e-05	0.000145574	5.21518e-05	9.18721e-06	0.0008657	1.12116e-05
RBM15;659;	2.95169e-06	6.88167e-05	3.19723e-06	0.998829	1.88391e-06	1.05529e-05	0.000145574	5.21518e-05	9.18721e-06	0.0008657	1.12116e-05
RBM15;741;	1.78387e-05	0.00039669	2.69491e-05	0.995306	1.14008e-05	7.04559e-05	0.000933366	0.00118311	5.19156e-05	0.00197343	2.89607e-05
RBM15;205;	7.70466e-06	0.000104656	2.23125e-05	0.99915	4.87367e-06	0.000121049	0.000325644	5.37014e-05	1.84901e-05	0.000174358	1.7426e-05
RBM15;208;	7.70466e-06	0.000104656	2.23125e-05	0.99915	4.87367e-06	0.000121049	0.000325644	5.37014e-05	1.84901e-05	0.000174358	1.7426e-05
RBM15;210;	7.70466e-06	0.000104656	2.23125e-05	0.99915	4.87367e-06	0.000121049	0.000325644	5.37014e-05	1.84901e-05	0.000174358	1.7426e-05
RBM15;212;	7.70466e-06	0.000104656	2.23125e-05	0.99915	4.87367e-06	0.000121049	0.000325644	5.37014e-05	1.84901e-05	0.000174358	1.7426e-05
RBM15;125;	5.28386e-05	0.000676449	6.07838e-05	0.940231	4.96651e-05	0.000157374	0.00610228	0.000553625	0.000334382	0.0513357	0.000445635
RBM15;127;	5.28386e-05	0.000676449	6.07838e-05	0.940231	4.96651e-05	0.000157374	0.00610228	0.000553625	0.000334382	0.0513357	0.000445635
RBM15;128;	5.28386e-05	0.000676449	6.07838e-05	0.940231	4.96651e-05	0.000157374	0.00610228	0.000553625	0.000334382	0.0513357	0.000445635
RBM15;130;	5.28386e-05	0.000676449	6.07838e-05	0.940231	4.96651e-05	0.000157374	0.00610228	0.000553625	0.000334382	0.0513357	0.000445635
RBM15;700;	2.64663e-07	8.53106e-06	2.60271e-07	0.999947	1.29759e-07	1.17245e-06	6.18277e-06	3.22803e-06	4.98414e-07	3.16716e-05	8.53121e-07
RBM15;292;	3.39338e-06	0.000109216	2.64829e-06	0.99885	1.73713e-06	1.01416e-05	7.7642e-05	4.62832e-05	7.04091e-06	0.000878461	1.37066e-05
RBM15;294;	3.39338e-06	0.000109216	2.64829e-06	0.99885	1.73713e-06	1.01416e-05	7.7642e-05	4.62832e-05	7.04091e-06	0.000878461	1.37066e-05
NOC3L;227;	0.000311859	5.45192e-05	0.995284	4.05928e-05	0.00115509	0.00110506	0.00021033	0.00147953	0.000306349	2.68821e-05	2.56392e-05
LEO1;14;	0.00267553	0.00408475	0.0024349	0.0255881	0.00613626	0.00364478	0.0396081	0.00178755	0.0259662	0.163807	0.724267
LEO1;294;	0.000183689	0.00015236	0.00147201	0.00164131	0.00256038	0.000439025	0.842668	0.000580946	0.133029	0.0137045	0.00356886
LEO1;296;	0.000183689	0.00015236	0.00147201	0.00164131	0.00256038	0.000439025	0.842668	0.000580946	0.133029	0.0137045	0.00356886
LEO1;300;	1.69917e-05	1.75678e-05	0.000165834	0.000280119	0.00020684	4.72888e-05	0.981229	0.000103927	0.015732	0.00200411	0.00019643
HNRPLL;59;	0.0625864	0.0108515	0.00390189	0.00195653	0.246136	0.00143275	0.00652655	0.0772758	0.0610436	0.139673	0.388616
HNRPLL;61;	0.0464108	0.00372044	0.00266126	0.000657941	0.403691	0.000794618	0.00264891	0.0170936	0.0375612	0.0319282	0.452832
HNRPLL;68;	0.0464108	0.00372044	0.00266126	0.000657941	0.403691	0.000794618	0.00264891	0.0170936	0.0375612	0.0319282	0.452832
THRAP3;240;	2.50193e-05	0.00195913	9.73732e-06	0.997026	5.78274e-06	8.59703e-05	5.76015e-05	5.9637e-05	1.19115e-05	0.00064836	0.000110674
THRAP3;248;	0.0620001	0.027999	0.466968	0.0035612	0.00510568	0.336041	0.00117594	0.0946265	0.00109419	0.000653228	0.00077475
THRAP3;253;	0.000911369	7.18896e-05	0.978556	6.25248e-05	0.0141091	0.00351418	0.00045048	0.000157852	0.00163277	6.79122e-05	0.000466196
THRAP3;257;	0.0012234	6.44013e-05	0.953718	4.40921e-05	0.0396976	0.00216343	0.00035506	0.000165981	0.00196578	6.41422e-05	0.0005377
THRAP3;315;	7.36174e-05	9.43594e-05	0.000145177	0.000971398	0.000772079	6.66737e-05	0.329861	0.000493404	0.0749024	0.588696	0.00392378
THRAP3;575;	1.19087e-06	0.000127076	6.03537e-07	0.99981	2.97196e-07	4.16751e-06	4.4246e-06	1.04993e-05	6.87751e-07	3.88873e-05	2.33285e-06
THRAP3;274;	2.42476e-06	1.29905e-06	7.7536e-06	3.93413e-06	0.000154352	1.02066e-06	0.00797876	8.80869e-05	0.990531	0.00121051	2.09974e-05
THRAP3;289;	2.42476e-06	1.29905e-06	7.7536e-06	3.93413e-06	0.000154352	1.02066e-06	0.00797876	8.80869e-05	0.990531	0.00121051	2.09974e-05
THRAP3;295;	2.42476e-06	1.29905e-06	7.7536e-06	3.93413e-06	0.000154352	1.02066e-06	0.00797876	8.80869e-05	0.990531	0.00121051	2.09974e-05
THRAP3;306;	2.42476e-06	1.29905e-06	7.7536e-06	3.93413e-06	0.000154352	1.02066e-06	0.00797876	8.80869e-05	0.990531	0.00121051	2.09974e-05
THRAP3;308;	2.42476e-06	1.29905e-06	7.7536e-06	3.93413e-06	0.000154352	1.02066e-06	0.00797876	8.80869e-05	0.990531	0.00121051	2.09974e-05
THRAP3;310;	2.42476e-06	1.29905e-06	7.7536e-06	3.93413e-06	0.000154352	1.02066e-06	0.00797876	8.80869e-05	0.990531	0.00121051	2.09974e-05
THRAP3;312;	2.42476e-06	1.29905e-06	7.7536e-06	3.93413e-06	0.000154352	1.02066e-06	0.00797876	8.80869e-05	0.990531	0.00121051	2.09974e-05
THRAP3;53;	0.442637	0.00142125	0.0031863	0.000107428	0.467029	0.000771867	0.000224146	0.00175085	0.0023231	0.000785075	0.0797638
THRAP3;55;	0.464674	0.402922	0.0135771	0.00190369	0.00160492	0.0850085	0.000214413	0.0285948	0.000251213	0.000384176	0.000865047
C6orf153;73;	4.81239e-06	0.000141105	3.58319e-06	0.999024	2.26169e-06	1.7951e-05	7.33063e-05	2.62947e-05	8.09221e-06	0.000670462	2.86063e-05
UTP14A;451;	0.000121634	0.00128181	7.04739e-05	0.000563216	3.32092e-05	8.22515e-05	8.40196e-05	0.997493	3.69542e-05	0.000214273	1.9341e-05
DNAJC21;468;	0.000617204	0.000204576	0.0122401	0.000382939	0.0414024	0.000383497	0.111539	0.0790558	0.749522	0.004109	0.000544192
SR140;202;	5.66236e-05	0.00740875	5.10837e-05	0.990965	8.64348e-06	0.00077061	6.8623e-05	0.000507965	1.24673e-05	0.000126527	2.41088e-05
SALL2;243;	5.51101e-05	0.000186942	0.00029616	0.0276926	0.000167259	0.00025753	0.949084	0.000898428	0.00336018	0.017679	0.000322713
DNM1L;616;	0.00026536	9.98084e-06	9.22887e-05	3.13326e-06	0.995715	8.45102e-06	3.95468e-05	8.25285e-05	0.00233362	8.5806e-05	0.00136414
ZNF532;335;	5.31096e-05	0.000106895	0.0001391	0.000410758	0.000194751	3.83807e-05	0.00775921	0.985349	0.00167851	0.00422214	4.79565e-05
STT3B;498;	0.00192779	0.000341062	0.0158274	0.000297968	0.311495	0.00046464	0.0207329	0.145003	0.498536	0.00421488	0.00116004
STT3B;499;	0.00192779	0.000341062	0.0158274	0.000297968	0.311495	0.00046464	0.0207329	0.145003	0.498536	0.00421488	0.00116004
STT3B;13;	0.000100293	9.01156e-05	0.00085824	0.000170616	0.000491321	8.8713e-05	0.00309633	0.992945	0.00164229	0.000482538	3.50303e-05
STT3B;14;	0.000100293	9.01156e-05	0.00085824	0.000170616	0.000491321	8.8713e-05	0.00309633	0.992945	0.00164229	0.000482538	3.50303e-05
STT3B;17;	0.000100293	9.01156e-05	0.00085824	0.000170616	0.000491321	8.8713e-05	0.00309633	0.992945	0.00164229	0.000482538	3.50303e-05
STT3B;18;	0.000100293	9.01156e-05	0.00085824	0.000170616	0.000491321	8.8713e-05	0.00309633	0.992945	0.00164229	0.000482538	3.50303e-05
STT3B;29;	0.000100293	9.01156e-05	0.00085824	0.000170616	0.000491321	8.8713e-05	0.00309633	0.992945	0.00164229	0.000482538	3.50303e-05
DDX54;75;	0.00281126	8.41355e-05	0.000938297	1.81292e-05	0.987929	5.99368e-05	0.000161305	0.00272988	0.00408686	0.000276271	0.000904774
SHROOM3;910;	0.000212535	0.000708531	0.000821422	0.00097334	2.53992e-05	0.997096	3.17691e-05	3.66462e-05	1.42299e-05	1.88788e-05	6.11217e-05
SHROOM3;913;	0.000128332	0.000559258	0.000363642	0.000538715	1.1545e-05	0.998322	1.32544e-05	2.04777e-05	6.06979e-06	8.95834e-06	2.81039e-05
SHROOM3;677;	0.000711418	0.00768511	0.00115087	0.0112543	6.12459e-05	0.978535	0.000100309	0.000159599	3.91682e-05	8.70771e-05	0.000215918
SHROOM3;1480;	0.000101688	0.000429332	0.000277535	0.000361247	8.58299e-06	0.998766	9.22099e-06	1.50465e-05	4.34435e-06	6.32946e-06	2.05435e-05
SHROOM3;582;	0.000939616	0.00393474	0.00437758	0.015518	0.000177254	0.973542	0.000396966	0.000290625	0.000137639	0.00020544	0.000479852
SHROOM3;439;	0.00316388	0.0275022	0.00430662	0.078502	0.000384375	0.881334	0.000753119	0.000656545	0.000288632	0.000739043	0.00236953
SHROOM3;443;	0.00316388	0.0275022	0.00430662	0.078502	0.000384375	0.881334	0.000753119	0.000656545	0.000288632	0.000739043	0.00236953
MKI67IP;218;	3.00445e-05	0.000118926	4.26086e-05	0.00222107	9.27461e-05	2.61765e-05	0.0430037	0.00730086	0.00200176	0.945019	0.000143438
MKI67IP;247;	0.00158296	0.53871	0.000849965	0.416013	0.000104256	0.0378054	0.000296368	0.00370711	8.86513e-05	0.000557395	0.000285387
KRR1;3;	1.91955e-05	2.3961e-06	8.56238e-05	2.43523e-06	0.084974	3.82707e-06	0.000316163	6.18683e-05	0.914333	9.19739e-05	0.000109235
KRR1;5;	0.000553426	0.00113299	0.000106896	0.00164907	0.00064653	0.000166455	0.00108845	0.000358359	0.00146451	0.108776	0.884057
GPS1;510;	0.00745349	0.00036486	0.000967011	9.17987e-05	0.86328	0.00017077	0.000694023	0.00192724	0.021482	0.00358323	0.0999856
GPS1;519;	0.00745349	0.00036486	0.000967011	9.17987e-05	0.86328	0.00017077	0.000694023	0.00192724	0.021482	0.00358323	0.0999856
GPS1;521;	0.00745349	0.00036486	0.000967011	9.17987e-05	0.86328	0.00017077	0.000694023	0.00192724	0.021482	0.00358323	0.0999856
GPS1;504;	0.00745349	0.00036486	0.000967011	9.17987e-05	0.86328	0.00017077	0.000694023	0.00192724	0.021482	0.00358323	0.0999856
SSBP3;347;	2.37014e-07	1.77889e-07	2.89392e-06	1.37195e-06	7.24202e-06	3.24244e-07	0.992776	7.92165e-06	0.00716872	3.4414e-05	1.1288e-06
SSBP3;352;	1.55453e-06	5.99788e-07	2.85341e-05	2.21464e-06	0.000172085	1.50922e-06	0.0144629	2.17032e-05	0.985256	4.6321e-05	6.93314e-06
EPS8L1;164;	0.928989	0.00399407	0.00729801	0.000200082	0.00545084	0.0260023	8.50999e-05	0.000245608	0.000245382	0.000155736	0.027334
ECM29;1002;	1.05419e-05	0.999938	4.12087e-07	3.27358e-05	1.71311e-07	1.34306e-05	1.36038e-07	1.52061e-06	8.55344e-08	8.90329e-07	2.28724e-06
ECM29;1005;	0.000596941	0.392605	0.000134773	0.600411	4.14819e-05	0.0045311	0.000120328	0.000426384	4.02989e-05	0.000585776	0.000507519
THOC2;1486;	0.952604	0.00429497	0.00319052	0.000125575	0.0204784	0.000974992	0.000126877	0.0150977	0.000567086	0.000386069	0.00215357
THOC2;1417;	0.872558	0.000941228	0.00350615	4.90312e-05	0.115686	0.000572514	8.45795e-05	0.00232666	0.000634938	0.000202644	0.00343759
THOC2;1419;	0.959818	0.000564017	0.00154792	2.4418e-05	0.0346027	0.000320116	3.51413e-05	0.000928927	0.00023722	8.91728e-05	0.00183251
THOC2;1421;	0.959818	0.000564017	0.00154792	2.4418e-05	0.0346027	0.000320116	3.51413e-05	0.000928927	0.00023722	8.91728e-05	0.00183251
THOC2;1422;	0.959818	0.000564017	0.00154792	2.4418e-05	0.0346027	0.000320116	3.51413e-05	0.000928927	0.00023722	8.91728e-05	0.00183251
TCF20;1322;	0.00116973	0.00283007	0.000343901	0.000223519	2.37214e-05	0.995248	8.31973e-06	2.21124e-05	6.64084e-06	1.086e-05	0.000112702
TCF20;1325;	0.00116973	0.00283007	0.000343901	0.000223519	2.37214e-05	0.995248	8.31973e-06	2.21124e-05	6.64084e-06	1.086e-05	0.000112702
TCF20;1335;	0.000545908	0.00786431	0.000435679	0.970257	0.000213474	0.00395131	0.00239972	0.000546741	0.000485744	0.00802158	0.0052787
TCF20;1792;	3.21499e-05	0.999681	1.89183e-06	0.000169239	5.68552e-07	0.000100908	5.10162e-07	5.00957e-06	2.91034e-07	2.48226e-06	5.8739e-06
XAB2;851;	0.179178	0.00112064	0.0163895	0.000108846	0.780014	0.00101308	0.000346432	0.0151918	0.00323422	0.000523727	0.00287997
FSCN1;38;	8.55372e-05	0.0201035	4.18352e-05	0.977396	1.31361e-05	0.000356261	0.000101847	0.00139195	2.05561e-05	0.000441754	4.77557e-05
FSCN1;39;	0.000117696	0.00217378	0.000215072	0.966249	7.86125e-05	0.000457132	0.00581477	0.016897	0.000339513	0.00752585	0.000131766
NEDD4L;475;	0.000123062	9.13653e-05	8.33074e-05	0.000208525	0.00192793	3.2225e-05	0.00889043	0.000615266	0.0641953	0.908155	0.0156773
NEDD4L;479;	0.000123062	9.13653e-05	8.33074e-05	0.000208525	0.00192793	3.2225e-05	0.00889043	0.000615266	0.0641953	0.908155	0.0156773
NEDD4L;483;	0.000168218	0.000157791	6.85813e-05	0.000302286	0.00117781	3.96585e-05	0.00316639	0.000451692	0.0114354	0.923957	0.0590751
NEDD4L;487;	0.000123062	9.13653e-05	8.33074e-05	0.000208525	0.00192793	3.2225e-05	0.00889043	0.000615266	0.0641953	0.908155	0.0156773
OSBPL8;329;	0.00307999	0.996343	1.64777e-05	2.95665e-05	4.71351e-06	0.000468812	9.74372e-07	3.64823e-05	1.00482e-06	3.57341e-06	1.58218e-05
OSBPL8;65;	4.01182e-05	2.92191e-05	0.00138326	0.000199318	0.000788143	8.93604e-05	0.949692	0.00236785	0.0444907	0.000855856	6.39544e-05
OSBPL8;68;	3.98424e-05	3.04158e-05	0.00135984	0.000218418	0.000713698	9.2841e-05	0.957772	0.00248254	0.0363665	0.000862238	6.2071e-05
OSBPL8;71;	3.98424e-05	3.04158e-05	0.00135984	0.000218418	0.000713698	9.2841e-05	0.957772	0.00248254	0.0363665	0.000862238	6.2071e-05
EPS15L1;238;	2.31202e-09	7.53016e-10	2.14316e-08	2.08522e-09	4.71034e-07	1.3702e-09	5.25283e-06	2.50003e-08	0.999994	9.75165e-08	1.63995e-08
EPS15L1;241;	2.31202e-09	7.53016e-10	2.14316e-08	2.08522e-09	4.71034e-07	1.3702e-09	5.25283e-06	2.50003e-08	0.999994	9.75165e-08	1.63995e-08
EPS15L1;244;	2.31202e-09	7.53016e-10	2.14316e-08	2.08522e-09	4.71034e-07	1.3702e-09	5.25283e-06	2.50003e-08	0.999994	9.75165e-08	1.63995e-08
EPS15L1;246;	2.31202e-09	7.53016e-10	2.14316e-08	2.08522e-09	4.71034e-07	1.3702e-09	5.25283e-06	2.50003e-08	0.999994	9.75165e-08	1.63995e-08
EPS15L1;247;	2.31202e-09	7.53016e-10	2.14316e-08	2.08522e-09	4.71034e-07	1.3702e-09	5.25283e-06	2.50003e-08	0.999994	9.75165e-08	1.63995e-08
EPS15L1;250;	2.31202e-09	7.53016e-10	2.14316e-08	2.08522e-09	4.71034e-07	1.3702e-09	5.25283e-06	2.50003e-08	0.999994	9.75165e-08	1.63995e-08
EPS15L1;253;	5.76716e-09	1.96455e-09	4.8133e-08	5.23554e-09	1.07405e-06	3.10869e-09	1.35057e-05	9.64144e-08	0.999985	2.86879e-07	3.34561e-08
EPS15L1;255;	2.31202e-09	7.53016e-10	2.14316e-08	2.08522e-09	4.71034e-07	1.3702e-09	5.25283e-06	2.50003e-08	0.999994	9.75165e-08	1.63995e-08
STAU2;188;	0.000958164	3.59034e-05	2.4086e-05	4.81805e-06	0.00109273	1.50379e-05	7.79699e-06	1.41376e-05	6.08406e-05	5.26721e-05	0.997734
DCP1A;524;	0.001459	0.000244574	0.0014713	0.000253591	0.0825296	0.000361749	0.00423568	0.000435209	0.094817	0.00693092	0.807261
DCP1A;525;	0.00155543	0.000240281	0.00157611	0.000232937	0.0557373	0.000438774	0.00263936	0.00030899	0.038118	0.00382187	0.895331
DCP1A;527;	0.00169513	0.000294554	0.00197158	0.000326586	0.0816833	0.000497964	0.00524479	0.000478641	0.0965679	0.00720523	0.804034
TCOF1;674;	7.18671e-05	7.82186e-07	0.000339336	2.07824e-07	0.99953	3.64356e-06	1.67964e-06	4.32296e-06	3.4119e-05	9.41189e-07	1.33296e-05
TCOF1;233;	7.44008e-08	1.45077e-07	5.1969e-07	4.4818e-06	5.24648e-07	1.69796e-07	0.999906	4.67164e-06	3.80699e-05	4.54218e-05	3.22783e-07
TCOF1;1293;	9.71171e-06	3.03224e-05	3.4015e-05	0.0023032	3.94629e-05	2.26476e-05	0.965602	0.000284779	0.00150634	0.0300884	7.93696e-05
TCOF1;1263;	0.000327365	3.74958e-05	0.00833712	4.94861e-05	0.426672	0.000183256	0.0048375	0.000330551	0.557268	0.00046069	0.00149623
TCOF1;1264;	0.000270539	3.5674e-05	0.00899268	5.35109e-05	0.234589	0.000182155	0.0070488	0.00036458	0.746901	0.000471968	0.00108983
TCOF1;1266;	0.000327365	3.74958e-05	0.00833712	4.94861e-05	0.426672	0.000183256	0.0048375	0.000330551	0.557268	0.00046069	0.00149623
TCOF1;1003;	1.08409e-05	4.9728e-07	0.000147075	2.68371e-07	0.99921	1.5277e-06	8.50322e-06	1.23616e-05	0.000599343	2.40285e-06	6.95602e-06
TCOF1;583;	2.96306e-05	0.000852699	2.07921e-05	0.979164	1.70122e-05	6.14384e-05	0.000812509	0.000675372	7.62129e-05	0.018169	0.000120952
TCOF1;503;	2.8413e-06	6.81762e-06	9.35752e-06	0.000262403	1.6407e-05	4.85561e-06	0.978045	8.50295e-05	0.00111496	0.0204229	2.96905e-05
SCFD1;297;	4.07436e-09	4.94291e-09	2.49446e-08	7.17706e-08	6.03885e-08	5.98407e-09	0.999973	1.17711e-07	2.20618e-05	4.26674e-06	3.49628e-08
SCFD1;298;	4.07436e-09	4.94291e-09	2.49446e-08	7.17706e-08	6.03885e-08	5.98407e-09	0.999973	1.17711e-07	2.20618e-05	4.26674e-06	3.49628e-08
MTA3;517;	0.00030932	0.000166034	6.00264e-05	0.000128363	0.00156176	3.85651e-05	0.000532256	0.000215371	0.00309889	0.0340546	0.959835
MTA3;519;	0.00030932	0.000166034	6.00264e-05	0.000128363	0.00156176	3.85651e-05	0.000532256	0.000215371	0.00309889	0.0340546	0.959835
MTA3;428;	0.998703	0.000900856	5.54728e-05	4.96327e-06	7.76438e-05	8.02562e-05	1.59382e-06	0.000113385	4.17516e-06	5.57112e-06	5.32269e-05
MTA3;430;	0.995763	0.00291448	0.000185354	1.63803e-05	0.000209243	0.000254504	5.13978e-06	0.00050857	1.26166e-05	1.68148e-05	0.000114121
SFRS18;601;	1.45578e-08	4.78599e-07	1.83498e-08	0.999999	6.01251e-09	1.26339e-07	2.15302e-07	1.04863e-07	1.87783e-08	4.75777e-07	3.52446e-08
SFRS18;561;	3.12617e-05	0.000415267	8.33064e-05	0.997649	1.58719e-05	0.000743578	0.000515932	9.94991e-05	4.56715e-05	0.00032642	7.39753e-05
SFRS18;563;	3.12617e-05	0.000415267	8.33064e-05	0.997649	1.58719e-05	0.000743578	0.000515932	9.94991e-05	4.56715e-05	0.00032642	7.39753e-05
SFRS18;311;	2.71747e-05	4.9698e-06	0.00062296	9.64807e-06	0.0144565	1.91943e-05	0.0031349	6.68864e-05	0.981381	0.000127198	0.000149549
SFRS18;313;	1.42726e-05	3.25532e-06	0.000364681	7.83482e-06	0.00421524	1.24442e-05	0.00478987	5.07823e-05	0.990365	0.000102057	7.47549e-05
FBXL11;28;	0.397988	0.000941773	0.0137568	0.000105154	0.507123	0.00259051	0.00021313	0.00057909	0.00184727	0.000346874	0.0745084
HIST3H2BB;56;	0.000183802	6.34739e-06	0.0154532	3.2251e-06	0.982619	4.29702e-05	6.11031e-05	7.93423e-05	0.00147675	1.36677e-05	6.07446e-05
HIST3H2BB;57;	0.000183802	6.34739e-06	0.0154532	3.2251e-06	0.982619	4.29702e-05	6.11031e-05	7.93423e-05	0.00147675	1.36677e-05	6.07446e-05
C12orf45;178;	0.000902088	0.00385389	0.000119735	0.00378145	0.000683139	0.000185525	0.00141063	0.00172742	0.00153807	0.883776	0.102022
C12orf45;181;	0.000902088	0.00385389	0.000119735	0.00378145	0.000683139	0.000185525	0.00141063	0.00172742	0.00153807	0.883776	0.102022
ZNF579;483;	0.000397466	0.000446419	0.000819964	0.00129524	0.00411464	0.000168372	0.154948	0.569412	0.114916	0.152644	0.000838675
C1orf55;278;	4.82471e-06	8.86173e-08	2.69169e-05	2.80214e-08	0.999954	2.89895e-07	3.49628e-07	1.0945e-06	1.0656e-05	1.75879e-07	1.21684e-06
C1orf55;289;	4.82471e-06	8.86173e-08	2.69169e-05	2.80214e-08	0.999954	2.89895e-07	3.49628e-07	1.0945e-06	1.0656e-05	1.75879e-07	1.21684e-06
LEMD2;138;	0.335292	0.000368688	0.00772791	3.41629e-05	0.646777	0.000769296	8.03912e-05	0.000473467	0.00079017	0.000124848	0.00756214
LEMD2;139;	0.57402	0.000437016	0.00638665	3.36605e-05	0.411656	0.000692151	7.20576e-05	0.000642333	0.000659554	0.000123076	0.00527727
LEMD2;497;	4.81915e-05	0.0015292	3.57148e-05	0.996979	1.32396e-05	0.00047286	0.000145272	6.49349e-05	2.66437e-05	0.0004774	0.000207451
LEMD2;499;	8.05458e-05	0.0052094	4.00025e-05	0.993066	1.43015e-05	0.000752905	9.60064e-05	8.34524e-05	2.22849e-05	0.000397792	0.00023771
LEMD2;501;	1.7419e-05	0.000750471	1.17941e-05	0.998731	4.37709e-06	0.000158648	4.80152e-05	2.75845e-05	8.67948e-06	0.000179113	6.33022e-05
TRIP10;296;	0.000463709	5.33742e-05	0.0004697	3.96705e-05	0.517868	5.07304e-05	0.00165999	0.000506277	0.461247	0.00277083	0.0148708
TRIP10;298;	0.00027528	2.4263e-05	0.000313085	1.61042e-05	0.848607	2.77452e-05	0.000582079	0.000211723	0.142987	0.000743248	0.0062129
TRIP10;299;	4.55742e-07	9.82657e-08	1.71387e-06	1.61295e-07	0.000245136	1.39676e-07	4.83981e-05	1.62947e-06	0.999682	1.19341e-05	8.01282e-06
TRIP10;304;	0.00027528	2.4263e-05	0.000313085	1.61042e-05	0.848607	2.77452e-05	0.000582079	0.000211723	0.142987	0.000743248	0.0062129
TRIP10;500;	0.00278539	0.000484849	0.00932369	0.000230035	0.0577816	0.00042514	0.00338923	0.901886	0.0213445	0.00178942	0.000560211
TRIP10;501;	0.00278539	0.000484849	0.00932369	0.000230035	0.0577816	0.00042514	0.00338923	0.901886	0.0213445	0.00178942	0.000560211
TRIP10;502;	0.00278539	0.000484849	0.00932369	0.000230035	0.0577816	0.00042514	0.00338923	0.901886	0.0213445	0.00178942	0.000560211
TRIP10;504;	0.00278539	0.000484849	0.00932369	0.000230035	0.0577816	0.00042514	0.00338923	0.901886	0.0213445	0.00178942	0.000560211
TOR1AIP2;13;	0.0140094	0.00157319	0.832755	0.000469251	0.0214634	0.00881494	0.00135414	0.115923	0.00278667	0.000432463	0.000418343
DHX57;127;	0.169629	0.533377	0.000867168	0.00365107	0.00275985	0.00327942	0.000402229	0.00414655	0.000714739	0.00748858	0.273685
AHCTF1P;1321;	0.000125216	2.5598e-06	0.00200675	8.45166e-07	0.997557	1.08587e-05	1.02325e-05	3.97022e-05	0.000222938	4.00205e-06	1.93943e-05
AHCTF1P;1551;	2.73378e-05	1.81567e-06	0.000341951	1.44216e-06	0.98611	6.38106e-06	7.57597e-05	2.08344e-05	0.0133203	1.66905e-05	7.73425e-05
AHCTF1P;1579;	2.13643e-08	2.64017e-08	1.8921e-07	3.50007e-07	2.87956e-07	3.46711e-08	0.999935	1.71219e-06	5.49466e-05	7.36318e-06	8.17694e-08
AHCTF1P;1180;	0.000677278	1.47415e-05	0.0464234	6.047e-06	0.95135	0.000143872	6.42785e-05	7.78656e-05	0.00103479	1.93616e-05	0.000188602
AHCTF1P;1252;	0.00204959	0.000241061	0.00183563	0.000186033	0.0544119	0.000535222	0.00141117	0.000237846	0.0165439	0.00194702	0.920601
AHCTF1P;1254;	0.00243467	0.000209049	0.00177324	0.000129716	0.106243	0.000426026	0.00101413	0.000236002	0.016071	0.00151914	0.869944
AHCTF1P;1256;	0.00200291	0.000167379	0.00124852	9.80412e-05	0.0778882	0.000317167	0.000708485	0.000180532	0.0109468	0.00117853	0.905263
AHCTF1P;1260;	0.00205392	0.000174501	0.00132466	0.00010394	0.0779169	0.000338045	0.000752144	0.000186559	0.0113967	0.00122323	0.904529
SIN3A;832;	0.999973	1.09845e-05	2.25617e-06	1.11093e-07	5.6203e-06	2.47084e-06	5.01001e-08	1.55521e-06	1.70535e-07	1.65465e-07	4.10676e-06
SIN3A;860;	0.973975	0.000186654	0.00136179	9.5254e-06	0.0227912	0.000248565	1.36647e-05	0.000164003	9.34032e-05	2.64789e-05	0.00112927
WBP11;353;	0.00585142	4.24121e-05	0.000412197	6.03346e-06	0.990544	4.05054e-05	2.7342e-05	0.000152783	0.000525069	5.84999e-05	0.00233981
WBP11;361;	0.00585142	4.24121e-05	0.000412197	6.03346e-06	0.990544	4.05054e-05	2.7342e-05	0.000152783	0.000525069	5.84999e-05	0.00233981
WBP11;364;	0.00585142	4.24121e-05	0.000412197	6.03346e-06	0.990544	4.05054e-05	2.7342e-05	0.000152783	0.000525069	5.84999e-05	0.00233981
DAXX;668;	0.000215808	6.09528e-06	0.00295757	2.95166e-06	0.995406	4.11417e-05	3.95532e-05	2.33162e-05	0.00102829	1.42834e-05	0.000265444
DAXX;671;	0.000215808	6.09528e-06	0.00295757	2.95166e-06	0.995406	4.11417e-05	3.95532e-05	2.33162e-05	0.00102829	1.42834e-05	0.000265444
DAXX;675;	0.000215808	6.09528e-06	0.00295757	2.95166e-06	0.995406	4.11417e-05	3.95532e-05	2.33162e-05	0.00102829	1.42834e-05	0.000265444
RIOK1;21;	0.000290091	0.0029535	0.000127833	0.088338	0.000241642	0.000308401	0.00512705	0.00108605	0.00115676	0.889693	0.0106776
RIOK1;22;	0.000290091	0.0029535	0.000127833	0.088338	0.000241642	0.000308401	0.00512705	0.00108605	0.00115676	0.889693	0.0106776
RIOK1;24;	0.000384192	0.000336711	0.000116102	0.000502282	0.0016731	8.88101e-05	0.00212825	0.00038124	0.00677559	0.188923	0.79869
MTA2;433;	0.000245564	5.61836e-05	0.0163083	0.0001129	0.0448859	0.0002264	0.0440899	0.00340382	0.889558	0.000810821	0.000302552
MTA2;435;	0.000245564	5.61836e-05	0.0163083	0.0001129	0.0448859	0.0002264	0.0440899	0.00340382	0.889558	0.000810821	0.000302552
HNRNPM;701;	0.000144468	8.12654e-06	0.0102309	5.92464e-06	0.979729	4.93706e-05	0.000216519	0.000112559	0.00935636	3.2965e-05	0.000113342
HNRNPM;29;	0.00090702	0.00035585	0.0434071	0.00091458	0.0357487	0.00106703	0.31434	0.0756774	0.522198	0.00466762	0.000715871
HNRNPM;528;	6.39657e-05	0.995838	7.84984e-06	0.00378375	2.46846e-06	0.000170249	4.35855e-06	9.01187e-05	1.83133e-06	2.3652e-05	1.41138e-05
HNRNPM;513;	0.00805186	0.0324919	0.0180158	0.00954664	0.00132613	0.0237407	0.00154595	0.902959	0.000776553	0.00115212	0.000393122
JPH1;473;	0.004447	4.70268e-05	0.000370646	7.79511e-06	0.987306	4.3883e-05	3.84139e-05	0.000135759	0.000834594	9.1702e-05	0.00667726
JPH1;475;	0.00567969	6.70391e-05	0.0004407	1.11223e-05	0.981443	5.66197e-05	5.45755e-05	0.000194618	0.00119009	0.000142648	0.0107195
JPH1;452;	0.000101209	6.09666e-06	9.66114e-05	3.16197e-06	0.986779	7.48353e-06	7.85075e-05	4.79457e-05	0.0114002	0.000100929	0.00137898
RBM15B;552;	5.47186e-05	0.000972021	5.38596e-05	0.995695	2.49487e-05	0.000399931	0.000537053	0.000109044	7.2704e-05	0.00169177	0.000389417
RBM15B;554;	9.25607e-05	0.00200518	6.74532e-05	0.993108	3.56212e-05	0.00054192	0.00054509	0.000151065	9.16988e-05	0.00261138	0.000750106
PLCH1;1026;	0.00996455	9.89096e-05	0.00961974	1.64049e-05	0.976623	0.000192134	9.04714e-05	0.00180276	0.00115152	7.56463e-05	0.000364558
PLCH1;1027;	0.00996455	9.89096e-05	0.00961974	1.64049e-05	0.976623	0.000192134	9.04714e-05	0.00180276	0.00115152	7.56463e-05	0.000364558
PLCH1;1029;	0.00996455	9.89096e-05	0.00961974	1.64049e-05	0.976623	0.000192134	9.04714e-05	0.00180276	0.00115152	7.56463e-05	0.000364558
PLCH1;1494;	0.000981428	7.69242e-05	0.751887	6.28044e-05	0.223411	0.000744378	0.00180033	0.00174869	0.0188114	0.000175495	0.000300302
PTRF;202;	0.00320711	4.19442e-05	0.0931736	1.08111e-05	0.901676	0.000265938	7.65224e-05	0.000424763	0.000907403	3.18476e-05	0.00018424
PTRF;203;	0.00320711	4.19442e-05	0.0931736	1.08111e-05	0.901676	0.000265938	7.65224e-05	0.000424763	0.000907403	3.18476e-05	0.00018424
PTRF;216;	0.0145084	0.000122739	0.12507	2.35294e-05	0.856734	0.000634508	0.000119373	0.00115605	0.00117437	6.43533e-05	0.000392961
PTRF;365;	0.014035	0.00133941	0.00262553	0.000378033	0.782992	0.000431944	0.00361776	0.0303379	0.09574	0.0227409	0.0457617
PTRF;366;	0.0153313	0.00140925	0.00267551	0.000381867	0.788423	0.000446913	0.00345529	0.0303489	0.0876048	0.0219778	0.0479458
PTRF;379;	0.00739157	0.000633043	0.00197741	0.000193924	0.862437	0.000253379	0.00233634	0.0203951	0.0780754	0.00974966	0.0165576
PTRF;387;	0.0565076	0.00816136	0.0047304	0.00163999	0.40634	0.00135845	0.00739273	0.105529	0.086592	0.109664	0.212085
PTRF;389;	0.0565076	0.00816136	0.0047304	0.00163999	0.40634	0.00135845	0.00739273	0.105529	0.086592	0.109664	0.212085
CCDC9;376;	0.000732028	4.18311e-06	0.000427018	7.90919e-07	0.998603	1.34668e-05	4.17203e-06	1.29205e-05	7.2589e-05	3.86632e-06	0.000125791
CCDC9;386;	0.000833042	4.72764e-06	0.000402648	8.82933e-07	0.998478	1.44167e-05	4.57119e-06	1.37503e-05	8.02277e-05	4.46446e-06	0.000163656
CCDC9;390;	0.000732028	4.18311e-06	0.000427018	7.90919e-07	0.998603	1.34668e-05	4.17203e-06	1.29205e-05	7.2589e-05	3.86632e-06	0.000125791
SPECC1L;171;	7.48525e-06	1.53799e-05	6.9149e-06	1.00657e-06	1.37951e-07	0.999968	4.79692e-08	3.05715e-07	3.53137e-08	4.28961e-08	1.76351e-07
SPECC1L;169;	7.48525e-06	1.53799e-05	6.9149e-06	1.00657e-06	1.37951e-07	0.999968	4.79692e-08	3.05715e-07	3.53137e-08	4.28961e-08	1.76351e-07
CHTF18;64;	2.99047e-07	5.03218e-07	1.81833e-06	8.85469e-06	2.65635e-06	4.67566e-07	0.999443	3.9089e-05	0.000269033	0.000233471	1.11965e-06
CHTF18;70;	2.99047e-07	5.03218e-07	1.81833e-06	8.85469e-06	2.65635e-06	4.67566e-07	0.999443	3.9089e-05	0.000269033	0.000233471	1.11965e-06
CHTF18;893;	1.04281e-06	2.06731e-07	1.18622e-05	3.91601e-07	0.000684436	5.29083e-07	0.00017538	3.50227e-06	0.999104	1.00314e-05	8.23679e-06
CHTF18;899;	2.14329e-05	3.36188e-06	0.000526337	5.3387e-06	0.0240547	1.15477e-05	0.0015135	7.48961e-05	0.973643	7.47619e-05	7.15334e-05
HUWE1;2889;	0.687882	0.0365988	0.00558822	0.0012066	0.0628144	0.00269297	0.001141	0.162731	0.00480651	0.00790213	0.0266372
HUWE1;2890;	0.0289449	0.000492096	0.00129957	7.12828e-05	0.878514	0.000244517	0.000292024	0.00142868	0.00533874	0.00122616	0.0821477
HUWE1;3921;	0.00209063	0.000629778	0.168687	0.00120967	0.0906109	0.00237437	0.171578	0.115214	0.441799	0.00466077	0.00114716
HUWE1;2362;	0.00148663	6.46512e-05	0.00776469	2.27825e-05	0.976838	0.000118646	0.000356423	0.00523571	0.00768362	0.000168379	0.000260669
HUWE1;2365;	9.78263e-05	6.95566e-06	0.00251919	5.12877e-06	0.971654	2.32551e-05	0.000282145	0.000240688	0.0250464	4.6661e-05	7.80023e-05
HUWE1;3818;	5.40365e-05	2.8742e-05	7.84436e-05	1.84603e-05	0.000323835	1.05783e-05	0.000198832	0.998551	0.000488573	0.000228024	1.93778e-05
HUWE1;1903;	0.000766654	0.00585691	0.000175535	0.000495404	0.000103637	0.000210583	8.52148e-05	0.991898	6.34276e-05	0.000287415	5.72795e-05
HUWE1;1907;	0.00223802	0.0252461	0.000382561	0.0013794	0.000225537	0.000573958	0.000174349	0.968819	0.000130193	0.000676257	0.000154284
HUWE1;2534;	0.0439705	0.000461752	0.845699	6.02591e-05	0.00330883	0.105715	5.06659e-05	0.000196645	0.000125114	2.87619e-05	0.000383572
HUWE1;1084;	0.000937789	2.78853e-05	0.880667	1.15974e-05	0.116498	0.000346906	0.000111106	0.000302381	0.000976462	2.49476e-05	9.59304e-05
HUWE1;1089;	0.000662611	2.54073e-05	0.929954	1.18606e-05	0.0674123	0.00030985	0.000129004	0.000359821	0.00103724	2.48466e-05	7.35058e-05
HMGA1;49;	5.8222e-07	4.04123e-07	7.46515e-06	2.83772e-06	2.0425e-05	7.656e-07	0.973508	1.78112e-05	0.0263681	7.10328e-05	2.76902e-06
HMGA1;36;	1.27778e-06	8.09178e-07	1.3604e-05	4.9473e-06	5.65615e-05	1.408e-06	0.782386	3.2198e-05	0.217307	0.000188824	7.57606e-06
HMGA1;44;	1.39829e-07	5.01261e-08	1.43388e-06	1.39864e-07	2.15577e-05	8.34669e-08	0.00044443	3.28745e-06	0.999522	5.91837e-06	6.00035e-07
IGF2BP2;161;	6.10015e-05	3.55899e-06	5.75397e-05	1.72247e-06	0.992494	3.96197e-06	4.42217e-05	4.12978e-05	0.00680043	5.68397e-05	0.000435279
IGF2BP2;164;	5.34669e-05	4.79382e-06	0.000364605	3.83369e-06	0.850845	9.34304e-06	0.000310011	0.000166153	0.148049	7.98781e-05	0.0001135
G3BP2;225;	0.000366663	3.41915e-05	0.000349173	1.93679e-05	0.845792	2.79435e-05	0.000702647	0.000794514	0.148515	0.00109636	0.00230155
NASP;497;	4.43584e-07	8.631e-07	1.72104e-06	2.38542e-05	3.37899e-06	7.12274e-07	0.9975	1.37726e-05	0.00036498	0.00208593	4.47411e-06
NASP;189;	1.53102e-05	1.77871e-05	0.000310554	0.000364346	0.000138499	7.2941e-05	0.992946	0.000154306	0.00524132	0.000671859	6.75397e-05
NASP;127;	4.62636e-06	1.24865e-05	6.72416e-06	0.000300316	2.07989e-05	4.82955e-06	0.0165841	6.91653e-05	0.000806032	0.982064	0.00012727
NASP;299;	0.000556373	0.00956999	0.00014111	0.00243649	0.000127329	0.000199097	0.000273433	0.984426	0.000144108	0.00198988	0.000136622
ATXN2;773;	7.941e-05	3.67571e-06	0.000128653	1.94405e-06	0.995539	7.87437e-06	3.87511e-05	1.65368e-05	0.00315851	3.11933e-05	0.000994211
ATXN2;775;	0.00081357	5.14254e-05	0.000753611	2.91401e-05	0.919013	8.1875e-05	0.000514111	0.000170767	0.0340134	0.000659112	0.0439003
ATXN2;777;	7.941e-05	3.67571e-06	0.000128653	1.94405e-06	0.995539	7.87437e-06	3.87511e-05	1.65368e-05	0.00315851	3.11933e-05	0.000994211
ATXN2;685;	8.18679e-07	1.46955e-07	3.50244e-06	2.07683e-07	0.000868497	2.24749e-07	5.02303e-05	2.88608e-06	0.999052	1.16672e-05	9.6197e-06
MYST2;50;	0.00123312	0.000155258	0.000813184	0.000107873	0.48456	0.000119658	0.0031622	0.00107246	0.414426	0.00938543	0.0849651
MYST2;52;	0.00123312	0.000155258	0.000813184	0.000107873	0.48456	0.000119658	0.0031622	0.00107246	0.414426	0.00938543	0.0849651
MYST2;56;	0.00123312	0.000155258	0.000813184	0.000107873	0.48456	0.000119658	0.0031622	0.00107246	0.414426	0.00938543	0.0849651
MYST2;57;	0.00120461	0.00015154	0.000819642	0.000107016	0.478632	0.000120433	0.00316814	0.0010051	0.417215	0.0090064	0.0885702
MYST2;99;	0.195408	0.0334529	0.00967897	0.000330095	0.000357131	0.759538	3.6648e-05	0.000867973	4.4193e-05	4.63807e-05	0.000240177
MYST2;100;	0.195408	0.0334529	0.00967897	0.000330095	0.000357131	0.759538	3.6648e-05	0.000867973	4.4193e-05	4.63807e-05	0.000240177
MYST2;102;	0.195408	0.0334529	0.00967897	0.000330095	0.000357131	0.759538	3.6648e-05	0.000867973	4.4193e-05	4.63807e-05	0.000240177
MYST2;111;	0.0527863	0.0119877	0.00788484	0.000194265	0.000188567	0.926305	2.2279e-05	0.000471229	2.52296e-05	2.42449e-05	0.000110527
RBM34;28;	2.47095e-07	7.14877e-08	6.99088e-07	1.34767e-07	5.94042e-05	7.48334e-08	5.79891e-05	1.57867e-06	0.999854	2.10414e-05	4.69344e-06
SFRS15;1004;	0.527423	0.0109008	0.353704	0.000596979	0.0166782	0.0467835	0.000434419	0.0411875	0.000938233	0.00036467	0.000988612
CTNND1;349;	6.59353e-06	0.000111536	8.52821e-06	0.996846	5.07278e-06	2.6436e-05	0.000552993	8.64656e-05	2.86268e-05	0.00229443	3.28236e-05
CTNND1;352;	7.52699e-06	0.000128486	9.2958e-06	0.996259	5.73623e-06	2.90824e-05	0.000589374	9.29027e-05	3.20939e-05	0.00280648	3.97737e-05
CTNND1;230;	1.11797e-07	3.79949e-06	1.07818e-07	0.999983	4.99179e-08	5.84537e-07	1.93883e-06	9.24555e-07	1.74145e-07	8.79386e-06	3.7723e-07
CTNND1;879;	0.00114695	0.000147556	0.0437283	4.53775e-05	0.000154859	0.954622	1.89227e-05	3.22063e-05	2.33226e-05	8.31809e-06	7.18839e-05
CTNND1;920;	6.09575e-06	4.90233e-05	2.67957e-06	0.00075704	7.26966e-06	4.03789e-06	0.000216629	7.37775e-05	4.96661e-05	0.998693	0.000140338
CTNND1;859;	1.56061e-05	2.73051e-05	0.000193876	1.9073e-05	1.68061e-06	0.999735	1.38215e-06	3.27077e-06	7.09987e-07	6.12808e-07	1.50936e-06
CTNND1;861;	8.0761e-06	1.56633e-05	7.08918e-05	8.55607e-06	7.0092e-07	0.999893	5.30856e-07	1.45231e-06	2.81483e-07	2.6279e-07	6.7902e-07
CTNND1;862;	8.0761e-06	1.56633e-05	7.08918e-05	8.55607e-06	7.0092e-07	0.999893	5.30856e-07	1.45231e-06	2.81483e-07	2.6279e-07	6.7902e-07
CTNND1;864;	0.000103924	0.000136837	0.00259656	0.000183172	2.07777e-05	0.996875	2.14717e-05	2.65623e-05	1.03287e-05	7.20459e-06	1.80681e-05
CTNND1;268;	8.23595e-05	0.00212691	4.46008e-05	0.941656	4.44275e-05	0.000156643	0.0013492	0.000603781	0.000179485	0.0530379	0.0007185
CTNND1;269;	8.23595e-05	0.00212691	4.46008e-05	0.941656	4.44275e-05	0.000156643	0.0013492	0.000603781	0.000179485	0.0530379	0.0007185
KIAA1967;673;	0.311701	0.00171092	0.0252926	0.000243871	0.402676	0.00662113	0.000461932	0.000769293	0.00345901	0.000689049	0.246376
KIAA1967;677;	0.0022661	0.000230429	2.1183e-05	1.46863e-05	0.000238727	3.28339e-05	7.97886e-06	2.25561e-05	3.06509e-05	9.06459e-05	0.997044
KIAA1967;680;	6.50969e-05	3.2597e-05	5.90529e-06	1.30407e-05	0.000116069	5.3551e-06	2.08103e-05	1.74144e-05	9.13266e-05	0.00095755	0.998675
KIAA1967;683;	0.000204117	0.000189352	1.97991e-05	9.12174e-05	0.000249563	2.26112e-05	9.6058e-05	7.88868e-05	0.000278295	0.00786708	0.990903
KIAA1967;688;	0.00010696	9.12106e-05	1.14501e-05	4.82582e-05	0.000145436	1.29192e-05	5.52886e-05	3.74622e-05	0.00016486	0.00370237	0.995624
KIAA1967;689;	0.00010696	9.12106e-05	1.14501e-05	4.82582e-05	0.000145436	1.29192e-05	5.52886e-05	3.74622e-05	0.00016486	0.00370237	0.995624
AHCYL1;2;	0.00198259	0.000421451	0.0109762	0.00026284	0.0464881	0.000439995	0.0054522	0.901523	0.0300337	0.00193435	0.000485651
PPP1R12A;299;	1.20333e-05	0.999954	4.25434e-07	6.02868e-06	9.51746e-08	2.52294e-05	5.10658e-08	1.1559e-06	3.49713e-08	1.87244e-07	4.54597e-07
PPP1R12A;304;	1.38025e-05	0.999942	5.32193e-07	8.27731e-06	1.16427e-07	3.32343e-05	6.52067e-08	1.41423e-06	4.37511e-08	2.36085e-07	5.60901e-07
PPP1R12A;507;	0.000775538	0.000169176	0.901028	0.000175518	0.000817861	0.0961994	0.000236181	0.000154982	0.000237983	4.2099e-05	0.000162873
PPP1R12A;509;	0.000923484	0.000167464	0.852596	0.000133054	0.000699503	0.144872	0.000145242	0.00012245	0.000161432	3.15418e-05	0.000147805
PPP1R12A;871;	0.12247	0.00417044	0.460236	0.0014222	0.16324	0.139043	0.0023986	0.0016318	0.0087486	0.00146292	0.0951754
PPP1R12A;473;	4.11436e-07	6.19984e-07	1.58041e-06	1.08338e-05	4.47748e-06	5.37354e-07	0.997042	1.03585e-05	0.0009486	0.00197554	5.228e-06
NUP214;678;	1.69748e-08	4.21274e-10	4.03302e-08	1.50937e-10	1	9.40055e-10	2.47074e-09	4.87598e-09	1.42644e-07	1.59796e-09	1.37252e-08
NUP214;433;	0.00188515	9.1503e-05	0.00759621	5.65284e-05	0.950191	0.000443637	0.000755435	0.000201764	0.019241	0.000376096	0.0191616
NUP214;666;	7.38e-07	3.34644e-08	4.66615e-06	1.86522e-08	0.999916	9.01343e-08	6.1124e-07	4.71468e-07	7.64229e-05	2.28652e-07	1.19991e-06
SMG1;3430;	0.0602776	0.006573	0.00168901	0.000610319	0.00319199	0.00776621	0.000185609	0.000257492	0.000440055	0.000647601	0.918361
SMG1;3436;	0.0316267	0.00455323	0.000621466	0.00034896	0.00146671	0.00276818	9.47388e-05	0.000148943	0.000222786	0.000432919	0.957715
DOCK7;888;	0.924644	0.00134783	0.0189406	6.36398e-05	0.00224256	0.0511725	2.95738e-05	0.000144173	7.77569e-05	3.42574e-05	0.00130348
DOCK7;896;	6.62352e-08	7.23432e-08	4.05466e-07	7.25411e-07	1.19398e-06	7.54196e-08	0.999326	4.33207e-06	0.000609877	5.64989e-05	3.75358e-07
DOCK7;898;	6.62352e-08	7.23432e-08	4.05466e-07	7.25411e-07	1.19398e-06	7.54196e-08	0.999326	4.33207e-06	0.000609877	5.64989e-05	3.75358e-07
DOCK7;900;	6.8857e-05	5.25776e-05	0.000108554	0.000218418	0.00169487	3.17227e-05	0.0847775	0.000554096	0.507362	0.40136	0.00377089
DOCK7;905;	6.62352e-08	7.23432e-08	4.05466e-07	7.25411e-07	1.19398e-06	7.54196e-08	0.999326	4.33207e-06	0.000609877	5.64989e-05	3.75358e-07
DOCK7;910;	6.62352e-08	7.23432e-08	4.05466e-07	7.25411e-07	1.19398e-06	7.54196e-08	0.999326	4.33207e-06	0.000609877	5.64989e-05	3.75358e-07
DOCK7;894;	4.85018e-05	4.12538e-05	8.73021e-05	0.000205947	0.00108924	2.54134e-05	0.147043	0.000516009	0.431504	0.417456	0.0019826
MCM2;4;	5.04796e-05	2.39784e-06	0.00184414	1.58531e-06	0.995488	1.34716e-05	4.86884e-05	2.42537e-05	0.00246471	9.82051e-06	5.2171e-05
MCM2;5;	4.61575e-05	1.79091e-06	0.00182729	1.02977e-06	0.997087	1.06978e-05	2.44818e-05	1.72552e-05	0.000945343	5.62523e-06	3.32894e-05
MCM2;7;	0.000114754	3.25101e-06	0.00138933	1.18674e-06	0.997849	1.04107e-05	1.85044e-05	8.62309e-05	0.000497469	7.04531e-06	2.2731e-05
MCM2;12;	1.20476e-05	3.07062e-07	0.000233536	1.28188e-07	0.999674	1.47882e-06	2.09405e-06	3.32967e-06	6.78338e-05	7.02677e-07	4.5488e-06
MCM2;13;	3.78707e-08	9.69572e-10	1.00395e-07	3.50808e-10	0.999999	2.17016e-09	5.9299e-09	1.26422e-08	3.40803e-07	3.66201e-09	2.71581e-08
MCM2;53;	0.769739	0.04787	0.00190517	0.000959442	0.0214421	0.00189544	0.00052306	0.0149352	0.00198262	0.00631563	0.132433
MCM2;26;	7.24035e-05	4.69918e-06	0.000635038	2.78683e-06	0.987644	1.0096e-05	0.000118971	0.000233423	0.0111912	3.46598e-05	5.25129e-05
MCM2;27;	5.30802e-05	3.40218e-06	0.00039675	1.99629e-06	0.990111	6.96831e-06	8.51817e-05	0.00015844	0.00911343	2.68261e-05	4.28533e-05
MCM2;40;	0.00811289	0.0917401	0.000801098	0.0591767	0.00166855	0.00379196	0.0024248	0.0025089	0.00188023	0.0866847	0.74121
DLGAP5;774;	0.00230778	0.00287837	0.00026369	0.000363314	0.00113415	0.000141563	0.000350863	0.98766	0.000657408	0.00366217	0.000580453
DLGAP5;777;	0.00230778	0.00287837	0.00026369	0.000363314	0.00113415	0.000141563	0.000350863	0.98766	0.000657408	0.00366217	0.000580453
USP32;1403;	6.17583e-06	8.00686e-07	2.73117e-07	1.57062e-07	7.29881e-06	2.31884e-07	2.21742e-07	2.65647e-07	1.32868e-06	2.62676e-06	0.999981
USP32;1413;	2.10297e-05	8.71737e-06	8.40244e-07	1.61994e-06	1.00841e-05	1.18777e-06	1.10148e-06	1.48035e-06	3.75232e-06	2.57784e-05	0.999924
USP32;1414;	0.000786399	7.38744e-05	2.29611e-05	1.07677e-05	0.001039	1.51574e-05	1.78406e-05	4.06363e-05	0.000132625	0.000257173	0.997604
USP32;1418;	0.00632481	0.000297508	6.08131e-05	2.24863e-05	0.00154995	5.4835e-05	2.15225e-05	7.29402e-05	0.000121326	0.000224017	0.99125
USP32;1420;	0.00632481	0.000297508	6.08131e-05	2.24863e-05	0.00154995	5.4835e-05	2.15225e-05	7.29402e-05	0.000121326	0.000224017	0.99125
USP32;1421;	0.00632481	0.000297508	6.08131e-05	2.24863e-05	0.00154995	5.4835e-05	2.15225e-05	7.29402e-05	0.000121326	0.000224017	0.99125
USP32;1422;	0.00632481	0.000297508	6.08131e-05	2.24863e-05	0.00154995	5.4835e-05	2.15225e-05	7.29402e-05	0.000121326	0.000224017	0.99125
LARP1;75;	5.34739e-07	6.53268e-07	2.95756e-06	6.55354e-06	7.89034e-06	5.82002e-07	0.997279	6.24617e-05	0.00213778	0.000498794	2.405e-06
LARP1;90;	5.44003e-06	4.35616e-06	4.83644e-05	2.60973e-05	0.00014504	5.3883e-06	0.932865	0.000635517	0.0653054	0.000943023	1.68549e-05
LARP1;517;	4.99058e-05	7.29626e-06	0.000159785	8.89702e-06	0.0561044	1.24137e-05	0.000949088	6.62368e-05	0.941008	0.000384678	0.00124889
LARP1;521;	6.69873e-05	7.62356e-06	0.000214197	7.45401e-06	0.265635	1.27287e-05	0.000646485	9.24884e-05	0.732144	0.000281378	0.000891641
LARP1;143;	2.60368e-06	1.6088e-06	2.82453e-05	8.70087e-06	0.000119917	2.59973e-06	0.647718	0.000103226	0.351678	0.00032533	1.1643e-05
LARP1;148;	2.67957e-05	3.28658e-06	0.000322707	3.79481e-06	0.113809	8.12993e-06	0.000627653	8.99818e-05	0.884947	7.56033e-05	8.62607e-05
ZC3H4;1114;	0.000490513	2.58028e-05	0.000240452	8.78439e-06	0.987851	1.86027e-05	0.000144394	0.000585082	0.00932594	0.00028283	0.00102653
ZC3H4;899;	1.45428e-08	4.16524e-09	7.31637e-08	8.15057e-09	4.22533e-06	5.16462e-09	6.73531e-06	2.11624e-07	0.999988	6.82843e-07	9.79822e-08
ZC3H4;904;	1.45428e-08	4.16524e-09	7.31637e-08	8.15057e-09	4.22533e-06	5.16462e-09	6.73531e-06	2.11624e-07	0.999988	6.82843e-07	9.79822e-08
ZC3H4;907;	1.45428e-08	4.16524e-09	7.31637e-08	8.15057e-09	4.22533e-06	5.16462e-09	6.73531e-06	2.11624e-07	0.999988	6.82843e-07	9.79822e-08
ZC3H4;908;	4.32394e-06	1.38876e-06	1.66586e-05	2.42352e-06	0.00074103	1.2934e-06	0.00126259	0.00016111	0.997551	0.000239792	1.84077e-05
ZC3H4;913;	1.45428e-08	4.16524e-09	7.31637e-08	8.15057e-09	4.22533e-06	5.16462e-09	6.73531e-06	2.11624e-07	0.999988	6.82843e-07	9.79822e-08
ZC3H4;914;	1.45428e-08	4.16524e-09	7.31637e-08	8.15057e-09	4.22533e-06	5.16462e-09	6.73531e-06	2.11624e-07	0.999988	6.82843e-07	9.79822e-08
ZC3H4;915;	1.45428e-08	4.16524e-09	7.31637e-08	8.15057e-09	4.22533e-06	5.16462e-09	6.73531e-06	2.11624e-07	0.999988	6.82843e-07	9.79822e-08
RRBP1;533;	0.000473517	2.69991e-05	0.023724	2.13634e-05	0.955037	0.000213939	0.000600129	0.00015861	0.0188671	0.000104214	0.000773372
CTNNA1;652;	3.27139e-05	0.0022933	2.77338e-05	0.996532	5.21496e-06	0.000910947	3.6857e-05	4.64688e-05	7.40144e-06	7.10085e-05	3.65996e-05
CTNNA1;655;	5.63096e-05	0.00461252	4.26842e-05	0.993411	8.03754e-06	0.00157907	4.94428e-05	7.02544e-05	1.06791e-05	0.000101233	5.86407e-05
HNRNPA1;95;	0.000467658	1.80715e-05	0.0783671	1.02962e-05	0.916539	0.000162135	0.000194097	0.000172622	0.00385179	3.70358e-05	0.000180372
HNRNPA1;4;	5.4618e-07	0.999998	2.05723e-08	7.20645e-07	7.06393e-09	4.73425e-07	4.94044e-09	1.74391e-07	3.18042e-09	2.64131e-08	3.68346e-08
HNRNPA1;6;	1.22668e-06	0.999992	5.95932e-08	4.48812e-06	2.24534e-08	1.24858e-06	2.01686e-08	5.96578e-07	1.18039e-08	1.2341e-07	1.39239e-07
HNRNPA1;2;	4.39867e-05	0.0155787	1.34175e-05	0.983482	6.27445e-06	0.000127781	4.27174e-05	0.000249213	9.93243e-06	0.000394885	5.12875e-05
SMARCC2;302;	4.86489e-08	6.93403e-08	4.62093e-07	1.18019e-06	5.0731e-07	9.59037e-08	0.999924	4.11458e-06	5.56219e-05	1.38318e-05	1.64423e-07
SMARCC2;304;	5.56432e-08	7.90263e-08	5.36287e-07	1.3367e-06	5.80532e-07	1.10283e-07	0.999914	4.75212e-06	6.26834e-05	1.51878e-05	1.85174e-07
SMARCC2;306;	1.13536e-07	1.14147e-07	1.34135e-06	1.17382e-06	1.99956e-06	1.83637e-07	0.999492	8.06453e-06	0.000475355	1.90809e-05	3.79117e-07
TMPO;348;	0.000149291	8.69144e-06	0.00833753	5.88481e-06	0.980915	4.10393e-05	0.000225001	0.00021532	0.00998438	3.61901e-05	8.19448e-05
TMPO;351;	2.85e-06	5.35257e-07	4.05773e-05	9.91102e-07	0.00205259	1.53528e-06	0.000401129	9.09031e-06	0.997451	2.06224e-05	1.8663e-05
TMPO;354;	0.000154735	2.89243e-06	0.00184561	8.88559e-07	0.997696	1.13778e-05	9.91694e-06	4.55311e-05	0.000207485	4.23984e-06	2.09379e-05
TMPO;355;	0.000149291	8.69144e-06	0.00833753	5.88481e-06	0.980915	4.10393e-05	0.000225001	0.00021532	0.00998438	3.61901e-05	8.19448e-05
CLTA;105;	0.998389	0.00078276	5.18495e-05	6.05859e-06	5.08084e-05	0.000332864	1.28431e-06	1.09437e-05	3.07906e-06	4.18618e-06	0.000367374
HNRNPC;220;	0.000176068	0.003321	0.000595115	0.980918	5.02338e-05	0.0131652	0.00064036	0.000580629	8.5906e-05	0.000347224	0.000120712
HNRNPC;225;	0.00010674	0.00397271	0.000202742	0.987939	2.05876e-05	0.00706106	0.000176383	0.000268276	2.96317e-05	0.000158124	6.43911e-05
HNRNPC;226;	0.000442215	0.00890275	0.00140726	0.936129	0.000101721	0.0501388	0.000893463	0.00107173	0.000145544	0.000526347	0.000240791
HNRNPC;227;	0.000442215	0.00890275	0.00140726	0.936129	0.000101721	0.0501388	0.000893463	0.00107173	0.000145544	0.000526347	0.000240791
HNRNPC;228;	0.00010674	0.00397271	0.000202742	0.987939	2.05876e-05	0.00706106	0.000176383	0.000268276	2.96317e-05	0.000158124	6.43911e-05
HNRNPC;149;	0.449285	0.532367	0.000514982	0.000521597	0.000314454	0.0115936	3.27209e-05	0.000323893	4.76448e-05	0.00014765	0.00485112
HNRNPC;153;	0.999997	9.17816e-07	3.11147e-07	8.30516e-09	1.70149e-07	9.83394e-07	2.50684e-09	4.13927e-08	6.53597e-09	5.6622e-09	1.68295e-07
NOLC1;632;	2.04234e-07	1.52466e-07	2.14695e-06	1.22026e-06	6.44593e-06	2.73693e-07	0.990569	4.629e-06	0.00937555	3.93858e-05	1.3409e-06
NOLC1;633;	2.04234e-07	1.52466e-07	2.14695e-06	1.22026e-06	6.44593e-06	2.73693e-07	0.990569	4.629e-06	0.00937555	3.93858e-05	1.3409e-06
NOLC1;407;	3.46768e-06	2.3998e-06	1.93688e-05	1.5659e-05	0.000130045	3.24109e-06	0.515611	4.32021e-05	0.482422	0.00169788	5.22351e-05
NOLC1;653;	4.76367e-05	5.02449e-05	0.000130042	0.000472366	0.000721829	4.56375e-05	0.696291	0.000356838	0.154208	0.145832	0.00184519
YAP2;127;	4.73121e-06	1.02438e-05	1.25889e-05	0.000241034	3.23215e-05	5.73506e-06	0.873851	0.000193885	0.00298337	0.122612	5.30476e-05
YAP2;128;	4.73121e-06	1.02438e-05	1.25889e-05	0.000241034	3.23215e-05	5.73506e-06	0.873851	0.000193885	0.00298337	0.122612	5.30476e-05
YAP2;131;	4.73121e-06	1.02438e-05	1.25889e-05	0.000241034	3.23215e-05	5.73506e-06	0.873851	0.000193885	0.00298337	0.122612	5.30476e-05
YAP2;138;	8.93106e-06	2.16257e-05	2.13693e-05	0.000499601	5.33923e-05	1.00363e-05	0.661229	0.000579995	0.00382103	0.333675	8.01347e-05
YAP2;109;	7.26461e-06	6.4769e-05	4.07833e-06	0.00200175	8.97942e-06	6.11585e-06	0.000487004	0.000132796	7.11212e-05	0.997104	0.000112544
YAP2;371;	0.140474	0.00025824	0.04615	3.22506e-05	0.807894	0.00137744	9.06652e-05	0.000459677	0.000816436	8.21327e-05	0.00236432
ABL1;823;	0.000100296	0.000642308	0.000179993	0.0788508	0.000202339	0.000177776	0.19452	0.00862769	0.00318355	0.713023	0.000492399
ABL1;824;	0.000100296	0.000642308	0.000179993	0.0788508	0.000202339	0.000177776	0.19452	0.00862769	0.00318355	0.713023	0.000492399
ABL1;827;	0.000100296	0.000642308	0.000179993	0.0788508	0.000202339	0.000177776	0.19452	0.00862769	0.00318355	0.713023	0.000492399
ABL1;828;	0.000100296	0.000642308	0.000179993	0.0788508	0.000202339	0.000177776	0.19452	0.00862769	0.00318355	0.713023	0.000492399
PAICS;27;	1.1106e-06	5.59146e-07	6.56674e-06	2.53465e-06	7.41967e-05	8.65723e-07	0.0152212	8.80498e-06	0.984452	0.000213326	1.90958e-05
WDR75;796;	0.00374395	1.44087e-05	0.00088759	2.20171e-06	0.994747	3.72642e-05	9.49886e-06	4.12071e-05	0.00014497	1.06039e-05	0.000361578
DHX29;200;	3.5717e-06	5.89012e-07	3.5132e-05	9.27745e-07	0.00429049	1.47367e-06	0.000251745	9.26533e-06	0.995355	2.35503e-05	2.84135e-05
HIST1H1B;2;	7.93187e-06	1.63486e-05	1.84661e-05	0.000334307	5.64711e-05	8.70388e-06	0.606644	0.000240676	0.00539783	0.387156	0.000118374
HIST1H1B;18;	3.38753e-06	1.15925e-05	4.94963e-06	0.000396602	1.2381e-05	3.82122e-06	0.0133721	8.33048e-05	0.000397811	0.985655	5.89448e-05
HIRA;584;	1.77923e-06	1.37492e-06	1.08549e-05	1.08282e-05	5.37147e-05	1.94754e-06	0.900515	2.37836e-05	0.0984493	0.00090736	2.43188e-05
HIRA;661;	0.774175	0.000815892	0.185818	6.10414e-05	0.0147317	0.0225941	5.94976e-05	0.000374626	0.000215748	5.05726e-05	0.00110414
RAVER1;584;	0.000263648	5.25316e-05	0.986855	9.03695e-05	0.00492805	0.00134328	0.00209942	0.000603062	0.00356494	9.25135e-05	0.000107616
FTSJ3;333;	0.0138392	0.00177415	0.630046	0.00222586	0.187292	0.0456938	0.0167951	0.00224912	0.0571804	0.00310541	0.0397987
FTSJ3;458;	0.136645	0.856824	0.000184207	0.000233248	9.0748e-05	0.00489783	1.1488e-05	0.000163114	1.51149e-05	5.07056e-05	0.000884687
FTSJ3;468;	0.136645	0.856824	0.000184207	0.000233248	9.0748e-05	0.00489783	1.1488e-05	0.000163114	1.51149e-05	5.07056e-05	0.000884687
FTSJ3;471;	0.136645	0.856824	0.000184207	0.000233248	9.0748e-05	0.00489783	1.1488e-05	0.000163114	1.51149e-05	5.07056e-05	0.000884687
C3orf59;29;	5.59049e-06	0.000628348	3.38507e-06	0.999091	1.3449e-06	2.10553e-05	1.97803e-05	0.00011124	2.9477e-06	0.00010927	5.95916e-06
LMNB1;23;	2.82192e-07	1.52127e-07	1.85281e-06	6.80175e-07	1.88084e-05	2.05836e-07	0.0131211	5.48552e-06	0.986784	6.47228e-05	2.55024e-06
UFD1L;283;	2.15722e-08	8.52885e-09	1.55565e-07	2.52998e-08	2.83245e-06	1.19026e-08	9.9179e-05	4.73782e-07	0.999895	1.80406e-06	1.31606e-07
GJA1;372;	2.27775e-05	7.93123e-06	0.000116229	2.45594e-05	0.00216897	1.55273e-05	0.0115734	5.53723e-05	0.984095	0.00112035	0.000799556
GJA1;373;	2.27775e-05	7.93123e-06	0.000116229	2.45594e-05	0.00216897	1.55273e-05	0.0115734	5.53723e-05	0.984095	0.00112035	0.000799556
GJA1;251;	0.00191768	0.0034458	0.020703	0.014023	0.000686505	0.954723	0.00146475	0.000574244	0.000556672	0.000496129	0.00140965
GJA1;255;	0.000104812	0.000191253	0.000154247	5.92955e-05	5.58521e-06	0.999456	2.87194e-06	4.9617e-06	1.93144e-06	2.38647e-06	1.63034e-05
GJA1;296;	0.0328563	0.000832899	0.365269	0.000129505	0.00235164	0.597401	7.74386e-05	0.000198778	0.000152182	4.46518e-05	0.000685873
GJA1;297;	0.0241399	0.0007318	0.241466	0.000113492	0.00156223	0.731097	6.1018e-05	0.000156147	0.00011264	3.55032e-05	0.000524612
GJA1;344;	0.0114015	0.00133967	0.0909382	0.00154974	0.494401	0.0103418	0.0201368	0.00196171	0.173908	0.00616577	0.187856
SON;1766;	0.993743	0.000269211	0.0038604	8.14266e-06	0.000816013	0.00103116	5.59755e-06	0.000175794	1.75665e-05	6.94964e-06	6.61748e-05
SON;1769;	0.999637	0.000173693	1.06819e-05	1.33914e-06	3.37449e-05	1.94519e-05	4.64041e-07	9.12585e-06	1.47639e-06	2.12553e-06	0.000110614
SON;1773;	0.993743	0.000269211	0.0038604	8.14266e-06	0.000816013	0.00103116	5.59755e-06	0.000175794	1.75665e-05	6.94964e-06	6.61748e-05
SON;1774;	0.993743	0.000269211	0.0038604	8.14266e-06	0.000816013	0.00103116	5.59755e-06	0.000175794	1.75665e-05	6.94964e-06	6.61748e-05
SON;1780;	0.306252	0.00368381	0.160299	0.000386706	0.00932723	0.512293	0.000204063	0.000496159	0.000478141	0.000175366	0.00640463
SON;1782;	0.929247	0.018431	0.00972072	0.000180176	0.000762778	0.0390468	3.85551e-05	0.00219715	6.2427e-05	5.52652e-05	0.000258123
SON;1783;	0.97702	0.00777559	0.00270949	5.96211e-05	0.00030185	0.011303	1.27937e-05	0.000656149	2.22053e-05	2.05311e-05	0.000118928
SON;1784;	0.994485	0.00239587	0.000534796	1.4601e-05	8.82959e-05	0.00228211	3.14802e-06	0.000141859	5.8671e-06	5.72236e-06	4.2497e-05
SON;1556;	0.0116057	0.986245	4.33421e-05	6.53885e-05	1.23927e-05	0.00190775	2.23302e-06	4.87259e-05	2.42731e-06	7.99199e-06	5.91208e-05
SON;1688;	0.0678773	0.496689	0.00194365	0.000848364	0.000160439	0.431364	3.33758e-05	0.000704629	3.14175e-05	6.16701e-05	0.000286679
SON;1697;	0.0645059	0.288543	0.00244983	0.000777563	0.000168139	0.642459	3.40211e-05	0.000714122	3.21058e-05	5.74021e-05	0.000258596
SON;1954;	0.998765	0.000620748	4.69391e-05	2.5155e-06	1.16779e-05	0.000527322	4.20374e-07	8.50195e-06	7.93956e-07	9.30487e-07	1.54378e-05
SON;152;	0.102923	0.622919	0.00154978	0.00203216	0.000332416	0.266326	6.78677e-05	0.000408273	7.0399e-05	0.000185434	0.00318585
SON;154;	0.0285021	0.954726	0.000178787	0.00028767	4.47664e-05	0.0158023	8.73585e-06	0.000104868	9.16667e-06	2.8498e-05	0.000307028
TOP2A;1387;	0.000112227	6.05539e-05	0.000185471	0.000190685	0.00419659	4.83786e-05	0.0409109	0.000407465	0.860469	0.0825733	0.0108453
TOP2A;1390;	0.000112227	6.05539e-05	0.000185471	0.000190685	0.00419659	4.83786e-05	0.0409109	0.000407465	0.860469	0.0825733	0.0108453
TOP2A;1423;	3.2548e-06	1.4907e-06	7.06861e-06	3.61344e-06	0.000259107	1.06171e-06	0.0024043	5.24983e-05	0.995442	0.00177212	5.39559e-05
TOP2A;1427;	3.2548e-06	1.4907e-06	7.06861e-06	3.61344e-06	0.000259107	1.06171e-06	0.0024043	5.24983e-05	0.995442	0.00177212	5.39559e-05
TOP2A;1428;	3.2548e-06	1.4907e-06	7.06861e-06	3.61344e-06	0.000259107	1.06171e-06	0.0024043	5.24983e-05	0.995442	0.00177212	5.39559e-05
TOP2A;1429;	2.49288e-05	2.09529e-05	5.80733e-05	0.000114109	0.000642577	1.44654e-05	0.264081	0.000386434	0.590511	0.143508	0.000638528
TOP2A;1249;	5.82876e-07	2.59547e-07	1.89669e-06	6.72656e-07	5.50635e-05	2.21993e-07	0.000936243	1.47721e-05	0.998821	0.000163884	5.45515e-06
TOP2A;4;	1.17317e-07	3.71737e-08	1.04686e-06	8.69998e-08	2.46509e-05	5.78467e-08	0.000145013	2.64252e-06	0.999822	4.02641e-06	4.85287e-07
TOP2A;1410;	3.2312e-07	3.41729e-05	2.70477e-07	0.999956	6.78424e-08	3.04449e-06	8.95843e-07	2.68207e-06	1.3e-07	2.37146e-06	2.95034e-07
TOP2A;1413;	3.86676e-07	1.86592e-05	2.65729e-07	0.999948	1.36896e-07	1.69766e-06	3.25486e-06	2.28476e-06	3.99622e-07	2.38128e-05	1.39935e-06
BRCA1;1189;	0.140635	0.00036827	0.0868956	5.33694e-05	0.762428	0.00285268	0.000146432	0.00047354	0.00123678	0.000121392	0.00478844
BRCA1;1191;	0.140635	0.00036827	0.0868956	5.33694e-05	0.762428	0.00285268	0.000146432	0.00047354	0.00123678	0.000121392	0.00478844
RPL34;12;	0.000649801	0.0775355	0.000543237	0.899929	9.46894e-05	0.0052693	0.000608602	0.0139161	0.000125614	0.00114373	0.00018407
RPL34;17;	0.000649801	0.0775355	0.000543237	0.899929	9.46894e-05	0.0052693	0.000608602	0.0139161	0.000125614	0.00114373	0.00018407
MARCKS;145;	0.913607	0.0427507	0.00102003	0.000105344	0.000147496	0.0418746	1.0491e-05	0.000208743	1.52528e-05	2.18139e-05	0.000238617
MARCKS;147;	0.00427507	0.98675	0.000171595	0.000818896	6.00699e-05	0.00116199	2.71723e-05	0.00650807	2.1595e-05	0.000110346	9.56503e-05
MARCKS;118;	0.00268433	0.00045808	0.00848951	0.000658341	0.246608	0.00130604	0.0206094	0.00104877	0.482522	0.00951303	0.226103
MARCKS;128;	0.00152704	0.000321998	0.00637803	0.000591478	0.134048	0.000935326	0.0303061	0.000893224	0.718519	0.00933801	0.0971415
MARCKS;131;	1.59178e-07	4.50897e-08	4.89281e-07	8.65721e-08	4.09321e-05	5.05342e-08	3.92956e-05	9.32872e-07	0.999903	1.18208e-05	3.04643e-06
MARCKS;132;	3.9113e-07	1.0382e-07	1.10196e-06	1.83386e-07	0.00011485	1.13482e-07	6.48769e-05	2.07434e-06	0.999784	2.48071e-05	7.80812e-06
MARCKS;134;	0.000679738	0.00017974	0.00371124	0.000433913	0.05249	0.000528229	0.0411206	0.00061416	0.861321	0.00737542	0.0315462
MARCKS;135;	0.000304511	4.05906e-05	0.000395361	3.63017e-05	0.258645	4.3398e-05	0.00196132	0.000347692	0.722935	0.00257761	0.0127124
MARCKS;26;	8.69048e-07	5.06232e-07	4.33474e-06	2.43502e-06	4.79443e-05	6.18274e-07	0.0304492	1.20233e-05	0.969102	0.000367687	1.24712e-05
MARCKS;27;	7.03452e-06	4.8859e-06	2.32232e-05	2.55705e-05	0.000262739	4.59066e-06	0.137746	8.89148e-05	0.851933	0.00974774	0.000156231
MARCKS;29;	8.69048e-07	5.06232e-07	4.33474e-06	2.43502e-06	4.79443e-05	6.18274e-07	0.0304492	1.20233e-05	0.969102	0.000367687	1.24712e-05
MARCKS;101;	0.010247	0.00304832	0.0019135	5.71537e-05	4.29637e-05	0.984557	5.70445e-06	8.45848e-05	6.16711e-06	6.08978e-06	3.16838e-05
MARCKS;167;	0.00076294	0.0814476	0.000787849	0.872735	7.78067e-05	0.0413334	0.000334009	0.00179282	7.97177e-05	0.000437085	0.000212038
MARCKS;170;	0.00076294	0.0814476	0.000787849	0.872735	7.78067e-05	0.0413334	0.000334009	0.00179282	7.97177e-05	0.000437085	0.000212038
MARCKS;163;	0.00081576	0.0990417	0.000792506	0.85891	8.0948e-05	0.0370807	0.000341714	0.00217381	8.24179e-05	0.000466925	0.000213136
MARCKS;46;	3.60006e-06	7.37043e-08	6.36375e-06	2.14807e-08	0.999976	1.4196e-07	2.75274e-07	1.19624e-06	1.06568e-05	2.01062e-07	1.25014e-06
PEBP1;52;	2.3535e-06	0.000457893	1.39116e-06	0.999488	3.69344e-07	2.01645e-05	3.24052e-06	1.25487e-05	5.93404e-07	1.11074e-05	1.95959e-06
PEBP1;54;	3.0333e-06	6.65591e-05	5.41838e-06	0.99978	1.21199e-06	5.63286e-05	3.19471e-05	1.0473e-05	3.2022e-06	3.51939e-05	6.80801e-06
PPFIA1;242;	0.000716943	0.00446547	0.0071699	0.917011	0.000572358	0.0263619	0.0309255	0.00619427	0.00183526	0.00403295	0.000714744
MAP4K4;706;	0.00041287	0.0150427	0.000326503	0.969911	6.87507e-05	0.0120173	0.000372842	0.000286837	9.02733e-05	0.000725463	0.000745084
MAP4K4;708;	0.00035865	0.0136963	0.000262007	0.974903	6.07342e-05	0.00858798	0.000337277	0.000253628	8.17738e-05	0.000729078	0.000729544
ZRANB2;181;	0.000148966	0.000934771	0.000341741	0.347472	0.000283302	0.000443955	0.346175	0.00366478	0.00410195	0.295419	0.00101464
USP14;216;	0.010873	0.93417	0.000385563	0.000527985	4.18068e-05	0.0535361	1.26571e-05	0.000323547	1.03857e-05	2.74763e-05	9.1735e-05
ATRX;1992;	2.16056e-08	2.27865e-08	2.69759e-07	2.77482e-07	3.4808e-07	4.04429e-08	0.999921	1.11653e-06	7.36512e-05	3.638e-06	8.00445e-08
ATRX;1993;	1.17588e-09	1.29854e-09	1.24167e-08	1.76508e-08	1.84093e-08	2.17002e-09	0.999995	4.68682e-08	4.72089e-06	3.04002e-07	5.60584e-09
ATRX;1996;	2.16056e-08	2.27865e-08	2.69759e-07	2.77482e-07	3.4808e-07	4.04429e-08	0.999921	1.11653e-06	7.36512e-05	3.638e-06	8.00445e-08
ATRX;1997;	2.16056e-08	2.27865e-08	2.69759e-07	2.77482e-07	3.4808e-07	4.04429e-08	0.999921	1.11653e-06	7.36512e-05	3.638e-06	8.00445e-08
ATRX;1062;	0.0074815	0.991014	5.06089e-05	7.00275e-05	1.28077e-05	0.00119192	2.62224e-06	0.000134148	2.68878e-06	8.7329e-06	3.08483e-05
ATRX;676;	0.000758415	7.42655e-05	0.994918	2.72049e-05	0.00114485	0.00144175	7.36079e-05	0.00138292	0.000136896	1.74855e-05	2.44034e-05
ATRX;678;	0.000899841	0.000126796	0.990395	6.28165e-05	0.00200428	0.0020229	0.000220641	0.00382034	0.000361595	4.18107e-05	4.39103e-05
SLC2A1;473;	0.0131342	0.000300921	0.951233	3.42499e-05	0.0008957	0.0339138	2.62492e-05	0.000336576	5.08391e-05	1.33028e-05	6.08276e-05
SLC2A1;475;	0.308098	0.00175342	0.482465	0.000113034	0.00340375	0.202844	6.39281e-05	0.000644625	0.000140436	4.64592e-05	0.000427462
SLC2A1;490;	0.308098	0.00175342	0.482465	0.000113034	0.00340375	0.202844	6.39281e-05	0.000644625	0.000140436	4.64592e-05	0.000427462
WTAP;288;	1.09978e-05	2.6037e-06	0.000167447	4.60749e-06	0.00366567	5.19567e-06	0.00264593	0.000249666	0.993125	0.000100287	2.26083e-05
WTAP;290;	1.09978e-05	2.6037e-06	0.000167447	4.60749e-06	0.00366567	5.19567e-06	0.00264593	0.000249666	0.993125	0.000100287	2.26083e-05
POLA1;215;	0.999878	9.43981e-06	4.84592e-05	2.31149e-07	3.27893e-05	2.2506e-05	1.51388e-07	3.07516e-06	5.4472e-07	2.44396e-07	4.84292e-06
POLA1;192;	0.0242059	0.00135559	0.00528177	0.000269582	0.833351	0.000550212	0.00191821	0.0891509	0.0307428	0.00522042	0.00795364
POLA1;196;	0.0512973	0.0043041	0.00827927	0.000691945	0.327356	0.00117916	0.0031961	0.55513	0.0280524	0.0106458	0.00986782
PPP1R2;121;	0.00105212	0.000330203	0.978246	0.000302814	0.00201258	0.00697718	0.000983287	0.00902037	0.000859726	0.00012554	8.98374e-05
PPP1R2;122;	0.00111575	0.000382289	0.97335	0.000409231	0.00249293	0.00756571	0.0015617	0.0115737	0.00126162	0.00017361	0.000112987
PPP1R2;127;	0.000706528	0.000180119	0.987424	0.000149121	0.00158028	0.0038316	0.000549167	0.00488173	0.000568771	7.17141e-05	5.70639e-05
PPP1R2;130;	0.00105212	0.000330203	0.978246	0.000302814	0.00201258	0.00697718	0.000983287	0.00902037	0.000859726	0.00012554	8.98374e-05
PGRMC1;54;	1.28036e-06	1.43939e-06	5.01297e-06	1.26753e-05	2.28355e-05	1.11407e-06	0.982388	7.30763e-05	0.0135304	0.00395364	1.05634e-05
NPM1;254;	2.33187e-07	1.7526e-07	2.5883e-06	1.48442e-06	7.00752e-06	3.40345e-07	0.99225	4.39372e-06	0.00769213	4.01394e-05	1.61805e-06
NPM1;10;	1.96257e-05	5.40602e-05	0.000118082	0.00193952	8.31155e-05	4.64881e-05	0.984393	0.00416534	0.00233895	0.00679648	4.55854e-05
EHMT2;569;	1.04982e-07	2.27329e-08	8.59586e-07	4.37907e-08	6.02282e-05	4.71008e-08	2.34265e-05	4.35024e-07	0.999912	1.64055e-06	9.94321e-07
EHMT2;232;	0.396078	0.0154126	0.00776831	0.000425917	0.00106778	0.574722	6.52512e-05	0.000258044	0.000105618	0.000103239	0.00399357
ENSA;124;	0.00447206	0.0716275	0.0045139	0.453257	0.000587534	0.455008	0.00163781	0.00134906	0.000538952	0.00208011	0.00492755
ENSA;125;	0.00447206	0.0716275	0.0045139	0.453257	0.000587534	0.455008	0.00163781	0.00134906	0.000538952	0.00208011	0.00492755
SEC61B;13;	6.05551e-07	4.52788e-07	6.04792e-06	3.90867e-06	1.79285e-05	8.85714e-07	0.981462	8.3771e-06	0.0183784	0.000115561	5.37974e-06
RPL37;97;	0.00206979	2.59831e-05	0.0786976	7.63225e-06	0.917849	0.000246354	5.34385e-05	0.000121745	0.000673656	2.12487e-05	0.00023375
TRIM33;1102;	0.000268914	5.82742e-06	0.998515	1.81103e-06	0.000730614	0.000428738	4.96674e-06	9.76116e-06	1.84908e-05	1.56073e-06	1.4233e-05
hD54;19;	3.00172e-06	1.65322e-06	3.485e-05	7.80778e-06	0.000171899	2.80111e-06	0.263817	0.000108709	0.735564	0.00027569	1.27937e-05
hD54;21;	7.68261e-06	3.70069e-06	0.000125547	1.51096e-05	0.000515016	7.44124e-06	0.176691	0.000290681	0.82199	0.000330722	2.3577e-05
hD54;12;	1.30217e-07	6.24151e-08	7.9098e-07	2.18886e-07	1.12183e-05	7.61003e-08	0.00156653	3.51901e-06	0.998394	2.24202e-05	9.0819e-07
NUP160;1157;	0.00251246	0.0036736	0.000294964	0.000198597	0.000336525	0.00019911	8.62336e-05	0.992156	0.000117067	0.000313902	0.000111776
EIF2B1;105;	0.997029	0.00131918	0.000269951	7.65265e-06	4.93894e-05	0.00122421	1.64839e-06	6.63187e-05	3.14857e-06	3.09651e-06	2.62264e-05
EIF2B1;107;	0.997264	0.00119154	0.000258933	7.09235e-06	4.75918e-05	0.00113635	1.55343e-06	6.22142e-05	2.98955e-06	2.90704e-06	2.48232e-05
RANBP2;2510;	2.58397e-07	7.73182e-09	2.00563e-06	3.42853e-09	0.999993	2.59646e-08	7.04884e-08	8.9855e-08	4.03549e-06	2.82246e-08	1.95681e-07
RANBP2;2239;	0.000258719	4.26782e-05	0.012456	8.87935e-06	1.8622e-05	0.987192	2.70358e-06	1.06772e-05	2.89911e-06	1.22775e-06	5.99519e-06
RANBP2;2242;	0.000258719	4.26782e-05	0.012456	8.87935e-06	1.8622e-05	0.987192	2.70358e-06	1.06772e-05	2.89911e-06	1.22775e-06	5.99519e-06
RANBP2;2246;	0.000258719	4.26782e-05	0.012456	8.87935e-06	1.8622e-05	0.987192	2.70358e-06	1.06772e-05	2.89911e-06	1.22775e-06	5.99519e-06
RANBP2;2250;	0.000258719	4.26782e-05	0.012456	8.87935e-06	1.8622e-05	0.987192	2.70358e-06	1.06772e-05	2.89911e-06	1.22775e-06	5.99519e-06
RANBP2;778;	2.53623e-07	1.37147e-07	1.3497e-06	5.85143e-07	1.68668e-05	1.66181e-07	0.00675238	4.4739e-06	0.99314	8.08765e-05	2.81676e-06
RANBP2;781;	7.29577e-09	3.07169e-09	4.24668e-08	1.00966e-08	8.3411e-07	4.13513e-09	4.35635e-05	1.00287e-07	0.999954	1.02165e-06	7.52977e-08
RANBP2;786;	2.53623e-07	1.37147e-07	1.3497e-06	5.85143e-07	1.68668e-05	1.66181e-07	0.00675238	4.4739e-06	0.99314	8.08765e-05	2.81676e-06
RANBP2;788;	2.53623e-07	1.37147e-07	1.3497e-06	5.85143e-07	1.68668e-05	1.66181e-07	0.00675238	4.4739e-06	0.99314	8.08765e-05	2.81676e-06
RANBP2;790;	2.53623e-07	1.37147e-07	1.3497e-06	5.85143e-07	1.68668e-05	1.66181e-07	0.00675238	4.4739e-06	0.99314	8.08765e-05	2.81676e-06
RANBP2;3204;	0.000259243	3.75753e-06	0.00490302	1.13271e-06	0.994548	2.22124e-05	1.03843e-05	2.99696e-05	0.000183074	4.30331e-06	3.50677e-05
RANBP2;3207;	0.00024872	3.64203e-06	0.00485174	1.11025e-06	0.994613	2.18869e-05	1.02549e-05	2.83561e-05	0.000181921	4.21367e-06	3.50115e-05
RANBP2;792;	2.43039e-05	2.90422e-06	0.00022713	3.21033e-06	0.126833	6.56172e-06	0.000485968	7.47621e-05	0.872178	7.32077e-05	9.11351e-05
RANBP2;796;	2.75274e-06	1.16717e-07	2.44745e-05	6.74961e-08	0.999791	4.16883e-07	1.94647e-06	1.07856e-06	0.000172426	6.48675e-07	5.08822e-06
DKC1;21;	2.61658e-06	5.41745e-07	1.88305e-05	1.03278e-06	0.00128697	1.21916e-06	0.0003478	6.30614e-06	0.998261	3.46361e-05	3.92198e-05
AKAP12;1587;	0.000300562	0.000580534	5.01597e-05	0.000566726	0.000523432	4.72347e-05	0.00085849	0.000896101	0.00158954	0.95568	0.038907
AKAP12;483;	7.82169e-07	0.999996	3.40731e-08	1.60534e-06	1.17022e-08	7.84187e-07	9.13601e-09	3.02976e-07	5.60971e-09	4.98198e-08	6.32588e-08
AKAP12;565;	0.786302	0.00340335	0.000761937	0.0001043	0.00453062	0.00131966	5.1264e-05	0.000230953	0.000198909	0.000233068	0.202864
AKAP12;566;	0.786302	0.00340335	0.000761937	0.0001043	0.00453062	0.00131966	5.1264e-05	0.000230953	0.000198909	0.000233068	0.202864
AKAP12;557;	2.1682e-05	1.83148e-05	3.16096e-05	5.94908e-06	1.76379e-05	6.88504e-06	9.53694e-06	0.999867	1.04746e-05	9.09336e-06	1.81294e-06
AKAP12;280;	0.00824817	0.000561013	0.00746752	5.9824e-05	0.000194065	0.983153	1.46605e-05	3.69776e-05	2.14271e-05	1.21095e-05	0.000231666
AKAP12;286;	4.60506e-05	9.13326e-06	7.34343e-05	8.31293e-07	8.79594e-07	0.999868	1.22444e-07	4.89227e-07	1.33768e-07	9.31011e-08	8.01871e-07
AKAP12;290;	7.01248e-05	1.35258e-05	8.03783e-05	9.2541e-07	9.60088e-07	0.999832	1.27896e-07	6.64966e-07	1.40309e-07	1.02352e-07	7.95303e-07
AKAP12;644;	1.55117e-06	1.17847e-06	1.50117e-05	1.07679e-05	4.19363e-05	2.43976e-06	0.972352	1.63535e-05	0.0272628	0.000279302	1.6229e-05
AKAP12;645;	1.55117e-06	1.17847e-06	1.50117e-05	1.07679e-05	4.19363e-05	2.43976e-06	0.972352	1.63535e-05	0.0272628	0.000279302	1.6229e-05
AKAP12;648;	1.55117e-06	1.17847e-06	1.50117e-05	1.07679e-05	4.19363e-05	2.43976e-06	0.972352	1.63535e-05	0.0272628	0.000279302	1.6229e-05
AKAP12;381;	2.77704e-05	0.999926	5.6225e-07	2.30759e-05	3.57552e-07	1.0518e-05	2.05012e-07	2.72789e-06	1.57929e-07	1.87124e-06	6.61769e-06
AKAP12;386;	0.00020279	0.999562	3.09689e-06	9.16859e-05	2.48755e-06	4.55601e-05	1.19961e-06	1.49798e-05	1.0335e-06	1.28196e-05	6.19139e-05
FAM21B;526;	0.00265613	0.00171981	0.038233	0.0132812	0.0261437	0.0118592	0.599472	0.00352681	0.245652	0.0259888	0.0314676
FAM21B;531;	0.002712	0.00168209	0.0409225	0.0123508	0.0282001	0.0118941	0.581397	0.00353367	0.261075	0.0248166	0.0314163
FAM21B;532;	0.00283635	0.00175703	0.0419678	0.0128055	0.0291283	0.012422	0.573563	0.00361112	0.262814	0.0256215	0.0334731
FAM21B;549;	0.00265613	0.00171981	0.038233	0.0132812	0.0261437	0.0118592	0.599472	0.00352681	0.245652	0.0259888	0.0314676
FAM21B;551;	0.00265613	0.00171981	0.038233	0.0132812	0.0261437	0.0118592	0.599472	0.00352681	0.245652	0.0259888	0.0314676
FAM21B;410;	0.00213487	0.00128703	0.0292229	0.0091488	0.0256415	0.00796643	0.577946	0.00293242	0.291397	0.0237615	0.0285618
FAM21B;821;	0.0057881	0.00396137	0.122249	0.0312552	0.0360948	0.04677	0.505481	0.00626508	0.176378	0.0265132	0.0392442
FAM21B;640;	0.00247829	0.00207555	0.0345799	0.0226138	0.0169765	0.0147049	0.698073	0.00384011	0.151782	0.0281536	0.0247222
FAM21B;451;	0.00224676	0.00173743	0.0324604	0.0171876	0.0177711	0.0120252	0.691158	0.00348994	0.172898	0.0257145	0.0233106
FAM21B;965;	0.00654038	0.00477733	0.105843	0.0392131	0.0363575	0.0507544	0.490735	0.00646711	0.172332	0.0330599	0.0539201
FAM21B;966;	0.00557494	0.00424689	0.0953101	0.0378928	0.0313508	0.0443766	0.537162	0.00618514	0.163516	0.0311156	0.0432691
FAM21B;196;	0.0039757	0.00187634	0.0892036	0.00999153	0.0524388	0.0174968	0.430194	0.00419939	0.336505	0.0192088	0.0349092
FAM21B;200;	0.00400754	0.00188185	0.0923147	0.00997673	0.0529409	0.0178252	0.428278	0.0042342	0.335261	0.0189225	0.0343568
FAM21B;1091;	0.00198899	0.00143399	0.0259106	0.0128452	0.0184636	0.00880431	0.669601	0.00303453	0.207138	0.0259973	0.024783
FAM21B;1092;	0.00198899	0.00143399	0.0259106	0.0128452	0.0184636	0.00880431	0.669601	0.00303453	0.207138	0.0259973	0.024783
FAM21B;714;	0.00285695	0.00213745	0.0262017	0.0184491	0.0232498	0.011319	0.595295	0.00358391	0.224738	0.0412443	0.0509249
NRD1;86;	0.999067	3.38142e-05	0.00044503	1.14034e-06	0.00027873	0.000127605	9.07543e-07	1.4628e-05	3.55439e-06	1.27272e-06	2.67163e-05
NRD1;94;	0.245595	0.000415361	0.0825087	4.51562e-05	0.665592	0.00183335	0.000121258	0.00119635	0.00097736	0.000107713	0.00160769
NRD1;96;	0.999409	3.43651e-05	0.000266705	9.54982e-07	0.000166791	8.44567e-05	7.01416e-07	1.70976e-05	2.58582e-06	1.05152e-06	1.61527e-05
RPL21;101;	0.000129679	0.0018943	0.000341529	0.966847	9.58283e-05	0.000702799	0.00899952	0.0148822	0.00042815	0.00554365	0.000135011
RPL21;104;	0.000129679	0.0018943	0.000341529	0.966847	9.58283e-05	0.000702799	0.00899952	0.0148822	0.00042815	0.00554365	0.000135011
ASMTL;229;	6.01368e-05	6.65873e-06	0.999201	4.30817e-06	0.000355036	0.000163468	2.61616e-05	0.000119565	5.55301e-05	3.5338e-06	4.85761e-06
ASMTL;240;	6.2887e-05	7.20331e-06	0.999105	4.88356e-06	0.000404902	0.000173368	3.17567e-05	0.000133456	6.72633e-05	4.08365e-06	5.46777e-06
ASMTL;247;	6.01368e-05	6.65873e-06	0.999201	4.30817e-06	0.000355036	0.000163468	2.61616e-05	0.000119565	5.55301e-05	3.5338e-06	4.85761e-06
ASMTL;19;	0.000252955	5.71302e-05	0.995223	5.66824e-05	0.000951281	0.00143723	0.000318671	0.00127886	0.000363995	3.2018e-05	2.7819e-05
ASMTL;21;	0.000252955	5.71302e-05	0.995223	5.66824e-05	0.000951281	0.00143723	0.000318671	0.00127886	0.000363995	3.2018e-05	2.7819e-05
RNF20;136;	3.41198e-08	7.0492e-10	5.96224e-08	2.35168e-10	1	1.65756e-09	3.1748e-09	5.37467e-09	1.56163e-07	2.32874e-09	3.40552e-08
RNF20;517;	0.000550393	0.997827	3.08594e-05	0.000385458	9.33658e-06	0.000335441	6.12273e-06	0.000805474	4.04858e-06	2.53694e-05	2.02275e-05
RNF20;526;	0.000550393	0.997827	3.08594e-05	0.000385458	9.33658e-06	0.000335441	6.12273e-06	0.000805474	4.04858e-06	2.53694e-05	2.02275e-05
RNF20;527;	0.000183226	0.999729	2.71896e-06	1.27619e-05	8.7834e-07	4.7009e-05	2.95282e-07	1.9519e-05	2.5625e-07	1.25796e-06	2.60799e-06
L1TD1;518;	3.06306e-07	3.08816e-07	1.46098e-06	2.9257e-06	6.40256e-06	3.12086e-07	0.993162	8.76432e-06	0.00629365	0.000520201	3.28506e-06
L1TD1;604;	0.000225699	0.998172	8.50947e-06	0.0011543	6.4343e-06	0.000120841	6.02354e-06	5.56586e-05	3.93258e-06	7.80528e-05	0.000168437
L1TD1;665;	0.000187332	0.949517	3.11612e-05	0.0490078	9.37857e-06	0.000784661	2.17606e-05	0.000255522	7.98318e-06	0.000113351	6.43303e-05
L1TD1;2;	0.00118165	0.877907	0.000121237	0.107978	0.000104378	0.00080436	0.000268919	0.00405074	0.000115966	0.00617023	0.00129732
ANKRD57;212;	9.53401e-05	0.00119613	3.03987e-05	0.0147542	7.08899e-05	6.24554e-05	0.00107973	0.000690231	0.000308421	0.979596	0.00211651
ANKRD57;213;	9.53401e-05	0.00119613	3.03987e-05	0.0147542	7.08899e-05	6.24554e-05	0.00107973	0.000690231	0.000308421	0.979596	0.00211651
BPTF;572;	0.0027612	0.0129426	0.0322299	0.408385	0.0013073	0.517401	0.0132037	0.00471328	0.00207324	0.00298772	0.00199462
BPTF;1103;	3.58995e-06	1.30656e-06	5.08288e-05	4.94757e-06	0.000394181	3.666e-06	0.0131684	1.8896e-05	0.986213	0.000107494	3.32943e-05
BPTF;1105;	5.43785e-06	2.00656e-06	9.85635e-05	7.85772e-06	0.000564733	6.16584e-06	0.0260711	3.34973e-05	0.973036	0.000136153	3.85074e-05
BPTF;1184;	2.01266e-06	0.000388436	9.82634e-07	0.999558	3.58071e-07	9.94628e-06	3.58007e-06	1.40932e-05	6.4601e-07	1.9822e-05	2.27992e-06
MACF1;2454;	1.85896e-05	7.57215e-07	0.000419845	4.48261e-07	0.998895	3.85481e-06	1.17623e-05	6.81766e-06	0.000619946	2.9741e-06	2.02534e-05
MACF1;3630;	1.86545e-05	0.999862	7.41946e-07	8.85898e-05	3.90005e-07	1.61458e-05	3.4965e-07	4.05916e-06	2.16557e-07	3.00925e-06	6.16996e-06
MACF1;3634;	1.93892e-05	0.999829	8.39129e-07	0.000116584	4.30892e-07	1.84295e-05	4.09926e-07	4.71832e-06	2.46501e-07	3.49565e-06	6.60714e-06
MACF1;1376;	0.00429803	0.000210931	0.94444	8.73474e-05	0.00435469	0.0453474	0.00013998	0.000134642	0.000330097	4.65665e-05	0.000610464
MACF1;1377;	2.19679e-05	1.60729e-06	0.999423	7.42333e-07	2.19044e-05	0.000523747	1.27775e-06	2.26684e-06	2.26719e-06	2.99227e-07	1.41506e-06
MACF1;1378;	2.19679e-05	1.60729e-06	0.999423	7.42333e-07	2.19044e-05	0.000523747	1.27775e-06	2.26684e-06	2.26719e-06	2.99227e-07	1.41506e-06
MACF1;1860;	0.000153953	0.980927	2.22933e-05	0.0178235	6.1196e-06	0.000845171	1.13789e-05	0.000104673	4.58727e-06	5.31811e-05	4.83556e-05
MACF1;1862;	1.53515e-05	0.999824	1.03929e-06	9.72001e-05	2.79116e-07	5.46134e-05	2.6699e-07	3.38317e-06	1.45504e-07	1.19685e-06	2.1702e-06
MACF1;2429;	0.031806	0.000183087	0.00398898	3.03585e-05	0.933445	0.000462596	0.000102944	0.000202405	0.00135553	0.000150898	0.0282723
DPYSL2;507;	5.39543e-06	9.22616e-06	1.37826e-05	0.000138649	5.03368e-05	5.28008e-06	0.82357	0.000194997	0.00789346	0.168045	7.30845e-05
DPYSL2;517;	8.53102e-06	0.000210772	8.68692e-06	0.995992	5.43631e-06	2.50829e-05	0.000408126	0.000254722	2.66169e-05	0.00303347	2.65938e-05
DPYSL2;518;	3.39245e-06	0.000114378	2.79747e-06	0.998913	1.73041e-06	1.00692e-05	8.17532e-05	6.80753e-05	7.01488e-06	0.000786779	1.07104e-05
DPYSL2;522;	3.03114e-06	0.000100955	2.47053e-06	0.99902	1.54701e-06	9.11055e-06	7.23283e-05	5.34897e-05	6.27448e-06	0.000720637	1.03022e-05
NCOA5;377;	1.81383e-05	0.000209172	3.55307e-05	0.995457	1.54495e-05	0.000126868	0.00176502	0.000123193	8.42204e-05	0.00206923	9.61382e-05
NCOA5;378;	1.81383e-05	0.000209172	3.55307e-05	0.995457	1.54495e-05	0.000126868	0.00176502	0.000123193	8.42204e-05	0.00206923	9.61382e-05
NCOA5;381;	5.22023e-07	1.13834e-05	7.0989e-07	0.999918	2.94411e-07	3.48618e-06	1.73323e-05	4.02291e-06	1.19412e-06	4.1484e-05	1.95267e-06
PTPN12;670;	0.479418	0.418792	0.00203017	0.00178325	0.00405233	0.00344239	0.000365683	0.080284	0.000684091	0.00276808	0.00637949
PTPN12;332;	0.00284456	0.000239345	0.000962601	8.88378e-05	0.889716	0.000118044	0.00141123	0.00480767	0.0797417	0.00536052	0.0147092
PTPN12;449;	0.00734334	0.868269	0.000446637	0.0323446	0.000688618	0.00142519	0.000908694	0.0503137	0.000622471	0.0319159	0.00572216
PTPN12;567;	0.00991137	0.0266666	0.00464907	0.0018356	0.000842909	0.00512185	0.000380276	0.9495	0.00031273	0.00053481	0.000244657
PTPN12;571;	0.0017817	0.00594668	0.00122547	0.000772868	0.000257251	0.00113428	0.000180552	0.988258	0.000127779	0.000240981	7.42869e-05
IGF2R;2400;	1.17805e-05	2.69391e-05	6.17314e-05	7.19686e-06	6.38554e-07	0.999888	3.91746e-07	1.99562e-06	2.2384e-07	2.29675e-07	5.4642e-07
IGF2R;2401;	1.17805e-05	2.69391e-05	6.17314e-05	7.19686e-06	6.38554e-07	0.999888	3.91746e-07	1.99562e-06	2.2384e-07	2.29675e-07	5.4642e-07
IGF2R;2409;	0.0917432	0.000374892	0.858189	5.28036e-05	0.0339292	0.0138973	8.72225e-05	0.000329419	0.00037545	5.2118e-05	0.000968909
STX7;81;	0.958753	0.0296431	0.00024542	0.000116997	0.000377236	0.00161071	1.72215e-05	0.000162468	3.68202e-05	9.28691e-05	0.0089439
SFRS8;153;	0.00215358	0.000214687	0.00178697	0.000152932	0.280617	0.000331932	0.00217717	0.000423573	0.0712023	0.00347457	0.637465
SFRS8;156;	0.00215358	0.000214687	0.00178697	0.000152932	0.280617	0.000331932	0.00217717	0.000423573	0.0712023	0.00347457	0.637465
SFRS8;157;	0.0020131	0.000105887	0.000587322	4.06902e-05	0.0604137	0.000157997	0.000208457	0.000100507	0.00316976	0.000475954	0.932727
SFRS8;174;	0.00215358	0.000214687	0.00178697	0.000152932	0.280617	0.000331932	0.00217717	0.000423573	0.0712023	0.00347457	0.637465
SFRS8;178;	0.00215358	0.000214687	0.00178697	0.000152932	0.280617	0.000331932	0.00217717	0.000423573	0.0712023	0.00347457	0.637465
SNRP70;226;	3.11153e-05	6.78817e-05	6.72149e-05	0.00178594	0.00017877	4.20094e-05	0.442513	0.000363177	0.00985279	0.544283	0.000814342
POLA2;141;	1.31895e-05	6.70861e-06	2.42208e-05	1.86307e-05	0.000751086	4.72162e-06	0.00909085	0.000114353	0.976104	0.0134034	0.000469077
POLA2;147;	2.39734e-07	1.08106e-07	7.67078e-07	3.104e-07	2.22279e-05	9.9833e-08	0.000498088	3.53644e-06	0.999386	8.47195e-05	3.54091e-06
POLA2;149;	2.39734e-07	1.08106e-07	7.67078e-07	3.104e-07	2.22279e-05	9.9833e-08	0.000498088	3.53644e-06	0.999386	8.47195e-05	3.54091e-06
POLA2;150;	2.39734e-07	1.08106e-07	7.67078e-07	3.104e-07	2.22279e-05	9.9833e-08	0.000498088	3.53644e-06	0.999386	8.47195e-05	3.54091e-06
POLA2;152;	6.65907e-05	3.12148e-05	8.1421e-05	6.44221e-05	0.00358838	1.73269e-05	0.0116006	0.000508499	0.916182	0.0649537	0.00290572
DNTTIP2;141;	0.00191801	0.00671897	0.000153822	0.00262317	0.000429543	0.000608908	0.000295759	0.00025623	0.000347138	0.00662906	0.980019
DNTTIP2;434;	2.34854e-05	0.000101475	3.04918e-05	0.00591838	5.99219e-05	3.38648e-05	0.0247172	0.000272905	0.00111585	0.967174	0.000551933
EIF3G;42;	2.43978e-05	5.68632e-05	4.56927e-05	0.000686632	0.000143171	1.89221e-05	0.189771	0.00455741	0.0074502	0.797101	0.000145525
RSF1;1053;	0.0233716	0.00012202	0.124833	2.10412e-05	0.848763	0.000782165	8.82456e-05	0.000598744	0.000837385	5.26135e-05	0.000530062
RSF1;392;	0.00464984	0.00450001	0.283935	0.00992839	0.00859647	0.0243026	0.0349037	0.61313	0.0118431	0.00340661	0.000804797
RSF1;397;	8.48673e-06	1.77757e-05	2.5299e-06	3.17468e-05	2.43495e-05	1.79496e-06	0.000120394	0.000114524	0.000166488	0.999218	0.000294006
RSF1;617;	0.965993	0.0001993	0.00190351	1.08404e-05	0.0300024	0.000312864	1.60849e-05	0.000178054	0.000111011	2.90957e-05	0.00124363
RSF1;622;	0.965993	0.0001993	0.00190351	1.08404e-05	0.0300024	0.000312864	1.60849e-05	0.000178054	0.000111011	2.90957e-05	0.00124363
RSF1;629;	0.965993	0.0001993	0.00190351	1.08404e-05	0.0300024	0.000312864	1.60849e-05	0.000178054	0.000111011	2.90957e-05	0.00124363
RSF1;632;	0.965993	0.0001993	0.00190351	1.08404e-05	0.0300024	0.000312864	1.60849e-05	0.000178054	0.000111011	2.90957e-05	0.00124363
RSF1;1359;	0.998475	5.1442e-05	0.000149292	1.87224e-06	0.000888614	7.02175e-05	1.6791e-06	1.45526e-05	8.6979e-06	3.74822e-06	0.000334411
RSF1;1370;	7.21065e-06	1.96219e-07	3.21619e-05	6.94181e-08	0.999903	4.64048e-07	1.15926e-06	4.38963e-06	4.81652e-05	5.90237e-07	2.43693e-06
RSF1;1375;	4.76646e-06	1.37888e-07	2.44597e-05	5.15731e-08	0.999922	3.39089e-07	9.33294e-07	3.03845e-06	4.22789e-05	4.45698e-07	1.8198e-06
RRP1B;732;	0.00150762	0.000121354	0.00540906	0.000103006	0.839985	0.000413959	0.00245159	0.000347126	0.10903	0.00116003	0.0394712
RRP1B;706;	0.000505678	7.37501e-05	0.949491	0.000106069	0.027968	0.00124031	0.00390541	0.00101285	0.0152564	0.000185365	0.000254789
VCL;434;	0.000123001	0.999708	2.71334e-06	1.38582e-05	5.67977e-07	0.000142171	2.14183e-07	6.5785e-06	1.68867e-07	7.14484e-07	2.01917e-06
NUP133;57;	6.17988e-05	0.000264088	0.000210157	6.64815e-05	3.107e-06	0.999372	2.35353e-06	1.47235e-05	1.22058e-06	1.5371e-06	3.01824e-06
NUP133;60;	6.17988e-05	0.000264088	0.000210157	6.64815e-05	3.107e-06	0.999372	2.35353e-06	1.47235e-05	1.22058e-06	1.5371e-06	3.01824e-06
ARHGEF2;790;	0.128792	0.000259196	0.0181426	3.28918e-05	0.844476	0.00109093	9.00504e-05	0.000324711	0.000886268	9.90989e-05	0.00580609
ARHGEF2;1050;	0.000229826	0.000388227	0.000536168	0.00222829	0.00165934	0.000146102	0.418363	0.234302	0.059814	0.281734	0.000598769
ARHGEF2;1054;	0.000312405	0.000336218	0.00103992	0.00124151	0.00374835	0.000177631	0.361752	0.408167	0.149524	0.0731161	0.000584953
NUP210;1852;	1.05275e-05	7.1035e-07	4.24326e-05	4.82238e-07	0.991486	1.40031e-06	2.42575e-05	1.13852e-05	0.00837378	1.01718e-05	3.91341e-05
NUP210;1856;	1.05275e-05	7.1035e-07	4.24326e-05	4.82238e-07	0.991486	1.40031e-06	2.42575e-05	1.13852e-05	0.00837378	1.01718e-05	3.91341e-05
NUP210;1863;	1.05275e-05	7.1035e-07	4.24326e-05	4.82238e-07	0.991486	1.40031e-06	2.42575e-05	1.13852e-05	0.00837378	1.01718e-05	3.91341e-05
NUP210;1864;	1.05275e-05	7.1035e-07	4.24326e-05	4.82238e-07	0.991486	1.40031e-06	2.42575e-05	1.13852e-05	0.00837378	1.01718e-05	3.91341e-05
PHIP;1315;	0.00118248	0.0161416	0.00233638	0.00424372	6.16876e-05	0.975104	7.05002e-05	0.000706228	3.0402e-05	5.49781e-05	6.80223e-05
PSMA5;16;	0.000800773	4.76457e-05	0.127701	3.8485e-05	0.845275	0.000474059	0.00107826	0.000363513	0.0233772	0.000145443	0.000699472
PSMA5;56;	0.38237	0.612238	0.000214366	0.000172468	0.000112871	0.00386975	1.11344e-05	0.000224381	1.60207e-05	4.78801e-05	0.000722923
NUP153;633;	9.46061e-05	7.36775e-06	0.997508	6.15981e-06	0.0017403	0.000342985	5.24116e-05	2.75863e-05	0.000186188	6.56653e-06	2.76145e-05
NUP153;516;	0.000345647	2.05609e-05	0.99005	1.47409e-05	0.00789194	0.000858421	0.000114033	6.0133e-05	0.0005132	1.81036e-05	0.000113543
NUP153;518;	0.000108477	5.68694e-06	0.99703	3.62171e-06	0.0024221	0.000233055	2.68142e-05	2.0334e-05	0.000122054	4.3781e-06	2.36706e-05
NUP153;519;	0.000108477	5.68694e-06	0.99703	3.62171e-06	0.0024221	0.000233055	2.68142e-05	2.0334e-05	0.000122054	4.3781e-06	2.36706e-05
NUP153;522;	0.00134	0.000247451	0.870489	0.000490207	0.0495827	0.00526824	0.0182117	0.001544	0.050661	0.000754574	0.0014114
EPS15;323;	0.977767	0.00743311	0.0010564	3.73346e-05	0.000121818	0.0132917	5.94253e-06	0.000179768	9.75214e-06	1.04174e-05	8.71375e-05
EPS15;324;	0.987498	0.00708342	0.000310184	2.0891e-05	5.52313e-05	0.00488101	2.82346e-06	7.49637e-05	4.65221e-06	5.96253e-06	6.33283e-05
EPS15;330;	0.977767	0.00743311	0.0010564	3.73346e-05	0.000121818	0.0132917	5.94253e-06	0.000179768	9.75214e-06	1.04174e-05	8.71375e-05
EPS15;790;	0.002682	0.000152227	0.00833711	1.27763e-05	4.67103e-05	0.988721	3.3986e-06	1.8475e-05	4.6878e-06	2.32345e-06	1.96105e-05
EPS15;796;	0.002682	0.000152227	0.00833711	1.27763e-05	4.67103e-05	0.988721	3.3986e-06	1.8475e-05	4.6878e-06	2.32345e-06	1.96105e-05
ASF1A;165;	0.674198	0.0104165	0.109348	0.000578425	0.0500035	0.011886	0.000654667	0.138347	0.00201271	0.000749747	0.00180527
ASF1A;166;	0.674198	0.0104165	0.109348	0.000578425	0.0500035	0.011886	0.000654667	0.138347	0.00201271	0.000749747	0.00180527
ASF1A;172;	0.674198	0.0104165	0.109348	0.000578425	0.0500035	0.011886	0.000654667	0.138347	0.00201271	0.000749747	0.00180527
CXXC1;124;	0.00579886	0.0216101	0.000480159	0.00716745	0.000874083	0.00292183	0.000544624	0.000472979	0.000582433	0.00640897	0.953139
MST4;4;	0.913261	0.000288272	0.00825946	1.90522e-05	0.0754169	0.000779737	3.18736e-05	0.000329152	0.000218657	4.38832e-05	0.00135193
RAI14;320;	2.55986e-05	7.3692e-06	0.000450399	2.27891e-05	0.00364001	2.68821e-05	0.0168578	7.42183e-05	0.97833	0.000325142	0.000239392
RAI14;321;	2.55986e-05	7.3692e-06	0.000450399	2.27891e-05	0.00364001	2.68821e-05	0.0168578	7.42183e-05	0.97833	0.000325142	0.000239392
RAI14;296;	0.00676468	0.00282153	0.000766675	0.00107815	0.0312102	0.000380769	0.00423298	0.0101949	0.0322292	0.322375	0.587946
RAI14;414;	2.33722e-06	1.44234e-06	2.45696e-05	7.8267e-06	0.000109126	2.30991e-06	0.619849	8.74584e-05	0.379594	0.000311544	1.10316e-05
RAI14;417;	2.33722e-06	1.44234e-06	2.45696e-05	7.8267e-06	0.000109126	2.30991e-06	0.619849	8.74584e-05	0.379594	0.000311544	1.10316e-05
RABEP1;407;	0.102415	0.000973163	0.000546194	6.39945e-05	0.00937011	0.000495879	5.79631e-05	0.000171575	0.00032119	0.000273012	0.885312
MMTAG2;216;	2.89137e-06	4.42651e-07	2.84103e-05	6.04875e-07	0.00573263	9.67269e-07	0.000156847	1.22272e-05	0.994035	1.62154e-05	1.33216e-05
MMTAG2;217;	5.42534e-06	8.26754e-07	6.04418e-05	1.21292e-06	0.00908184	2.1328e-06	0.000299313	1.49485e-05	0.990473	2.78141e-05	3.31067e-05
MMTAG2;220;	3.66742e-05	4.51089e-06	0.000555897	5.63034e-06	0.123714	1.35069e-05	0.00092692	8.59492e-05	0.874421	9.40088e-05	0.000142535
RIF1;1544;	0.00339119	0.97886	0.000447762	0.00339345	7.43295e-05	0.00632478	5.61069e-05	0.00717378	3.2866e-05	0.000141084	0.000104656
RIF1;2163;	1.37135e-05	1.23554e-05	4.58341e-05	9.6627e-05	0.000307737	1.18372e-05	0.735586	0.000155759	0.231363	0.0320626	0.000343763
RIF1;2165;	2.54385e-05	4.30352e-05	7.26938e-05	0.000421564	0.000227605	2.09923e-05	0.851608	0.00593503	0.0215864	0.119941	0.000118156
RIF1;2393;	1.82224e-05	0.999619	1.61273e-06	0.000281653	4.37676e-07	6.45677e-05	5.28559e-07	7.9649e-06	2.59318e-07	2.44309e-06	2.93591e-06
RIF1;2395;	5.78075e-06	0.999973	2.79127e-07	6.88964e-06	6.55921e-08	1.20461e-05	4.43505e-08	1.227e-06	2.76519e-08	1.71955e-07	2.88914e-07
RIF1;1578;	1.16493e-05	0.0014987	8.96423e-06	0.998117	2.22024e-06	8.37602e-05	2.44522e-05	0.000175413	3.91949e-06	6.65804e-05	7.24227e-06
RIF1;1581;	2.79457e-06	0.000513014	1.26781e-06	0.999403	5.23986e-07	1.13591e-05	5.44757e-06	2.08215e-05	9.87599e-07	3.74259e-05	3.65346e-06
RIF1;1048;	0.226631	0.358912	0.00325903	0.00759175	0.0164441	0.00405356	0.00239029	0.258569	0.00500996	0.0515206	0.0656196
ARRB1;479;	0.0318271	0.00135583	0.0322492	0.00057147	0.321633	0.00784586	0.00201359	0.000836669	0.0153882	0.00188731	0.584392
EPHA1;906;	0.000630973	0.000250148	0.0748789	0.00111388	0.0216075	0.00208071	0.51707	0.00385345	0.374497	0.00282161	0.00119574
DHCR7;14;	0.00093117	0.358756	0.000148519	0.631323	8.73337e-05	0.00214643	0.000278472	0.000815953	0.0001008	0.00325722	0.00215537
ZMYM2;303;	0.00161792	0.000123505	0.732703	3.1144e-05	0.000254337	0.26511	1.97023e-05	6.34658e-05	2.78566e-05	7.4132e-06	4.16097e-05
ZMYM2;305;	0.847103	0.00249557	0.0556847	7.9157e-05	0.00136981	0.0923404	3.10496e-05	0.000535188	6.39175e-05	3.03023e-05	0.000267105
PRCC;209;	3.56535e-05	0.000100783	9.86605e-06	0.00026935	6.53443e-05	1.09872e-05	0.000362746	0.00012021	0.000343443	0.993114	0.00556724
PRCC;212;	0.000136664	0.000152472	2.91252e-05	0.000184684	0.000244584	3.60027e-05	0.00023736	6.13654e-05	0.000490429	0.0109949	0.987432
PARN;619;	0.983222	0.0010905	0.00387612	1.88119e-05	0.000250964	0.0113082	5.92417e-06	0.000135438	1.21993e-05	7.50195e-06	7.24407e-05
PARN;557;	0.000104232	0.011888	0.000104727	0.98404	1.36062e-05	0.00320412	8.52538e-05	0.000371991	1.7092e-05	0.000127785	4.28943e-05
PARN;562;	0.000104232	0.011888	0.000104727	0.98404	1.36062e-05	0.00320412	8.52538e-05	0.000371991	1.7092e-05	0.000127785	4.28943e-05
RANGAP1;427;	7.05405e-08	1.7309e-08	7.15799e-07	3.39903e-08	3.01313e-05	3.17806e-08	2.9801e-05	8.49179e-07	0.999937	1.23487e-06	3.04765e-07
RANGAP1;428;	6.25445e-07	2.94513e-07	5.40211e-06	1.05297e-06	5.26799e-05	4.20947e-07	0.00936959	2.21442e-05	0.990486	5.92253e-05	2.92738e-06
RANGAP1;435;	7.05405e-08	1.7309e-08	7.15799e-07	3.39903e-08	3.01313e-05	3.17806e-08	2.9801e-05	8.49179e-07	0.999937	1.23487e-06	3.04765e-07
RANGAP1;442;	7.15371e-08	1.95843e-08	7.46202e-07	4.23271e-08	2.21597e-05	3.51169e-08	5.18957e-05	1.08409e-06	0.999922	1.58124e-06	2.9916e-07
WIZ;1146;	0.000542444	3.80268e-06	0.000694121	7.26455e-07	0.998598	1.14874e-05	4.44605e-06	2.65266e-05	7.5473e-05	3.41048e-06	3.97837e-05
WIZ;1151;	0.000542444	3.80268e-06	0.000694121	7.26455e-07	0.998598	1.14874e-05	4.44605e-06	2.65266e-05	7.5473e-05	3.41048e-06	3.97837e-05
WIZ;1155;	0.000542444	3.80268e-06	0.000694121	7.26455e-07	0.998598	1.14874e-05	4.44605e-06	2.65266e-05	7.5473e-05	3.41048e-06	3.97837e-05
WIZ;1006;	0.994588	0.000228933	0.00179658	7.78639e-06	0.00257526	0.000318686	7.68394e-06	0.000309197	3.28655e-05	1.19666e-05	0.000123189
WIZ;1010;	0.998694	9.29777e-05	0.000408755	2.51771e-06	0.000555073	0.000108769	2.08648e-06	8.07591e-05	8.35454e-06	3.59971e-06	4.27176e-05
WIZ;1012;	0.994435	0.000232863	0.00184904	7.95674e-06	0.00265349	0.000325253	7.88042e-06	0.000317321	3.37516e-05	1.22463e-05	0.000125696
WIZ;1017;	0.00256548	0.000243509	0.347413	0.000186581	0.54498	0.00118701	0.00650226	0.0174906	0.0780054	0.000734913	0.000690448
COPA;173;	0.99996	2.43311e-05	1.48939e-06	1.46442e-07	2.70656e-06	3.6063e-06	4.30444e-08	8.67594e-07	1.22696e-07	1.64213e-07	6.79281e-06
COPA;179;	0.99996	2.43311e-05	1.48939e-06	1.46442e-07	2.70656e-06	3.6063e-06	4.30444e-08	8.67594e-07	1.22696e-07	1.64213e-07	6.79281e-06
PRKDC;3205;	8.61928e-06	2.11705e-06	0.00020412	4.421e-06	0.00253848	5.51754e-06	0.00366972	0.000131478	0.993344	7.21588e-05	1.95701e-05
PRKDC;2612;	0.000114313	5.64742e-05	0.00246466	0.000343148	0.00417289	0.00024723	0.556397	0.000452611	0.432354	0.00247929	0.000918567
BAZ2A;1819;	4.91044e-05	0.00205723	2.24008e-05	0.994265	1.55659e-05	0.000153931	0.000207493	0.000120522	3.89288e-05	0.00271116	0.000359115
BAZ2A;1821;	4.74819e-05	0.00538826	1.49242e-05	0.992134	1.04066e-05	0.000105087	9.81265e-05	0.000185904	2.14691e-05	0.00182437	0.000169752
IWS1;398;	0.00132236	0.000154603	0.491725	0.000204037	0.330366	0.00162597	0.0123822	0.00203521	0.15832	0.000666777	0.00119838
IWS1;400;	0.00132236	0.000154603	0.491725	0.000204037	0.330366	0.00162597	0.0123822	0.00203521	0.15832	0.000666777	0.00119838
IWS1;54;	1.7409e-05	4.86661e-05	3.85458e-05	0.00115039	8.642e-05	1.90328e-05	0.461148	0.00191854	0.00432159	0.531135	0.000116876
IWS1;248;	0.986828	0.000609277	0.000226764	1.63431e-05	0.00287326	0.000179573	1.20714e-05	0.000121979	6.11618e-05	5.33344e-05	0.00901812
IWS1;250;	0.000111759	1.07414e-05	0.000233032	7.49346e-06	0.769943	1.2476e-05	0.000447725	0.00030665	0.228112	0.000313453	0.000502433
MAP1S;582;	2.59607e-05	3.73044e-06	1.895e-06	1.02301e-06	8.64777e-05	1.1668e-06	2.46114e-06	2.40049e-06	2.03694e-05	3.33125e-05	0.999821
MAP1S;585;	2.59607e-05	3.73044e-06	1.895e-06	1.02301e-06	8.64777e-05	1.1668e-06	2.46114e-06	2.40049e-06	2.03694e-05	3.33125e-05	0.999821
MAP1S;759;	0.0024517	0.000129763	0.00328176	7.25913e-05	0.866818	0.000354539	0.000860061	0.000252472	0.0256201	0.000777021	0.0993817
MAP1S;762;	0.0204172	0.000187083	0.000897843	2.5091e-05	0.956688	0.000130919	9.98703e-05	0.000518316	0.00177919	0.000294981	0.0189613
MAP1S;763;	0.0358958	0.000321499	0.00125678	3.89759e-05	0.937263	0.000191384	0.000144585	0.00101229	0.0023738	0.000461804	0.02104
MAP1S;766;	0.00670642	7.53631e-05	0.000580106	1.32119e-05	0.969787	7.85728e-05	6.16376e-05	0.000156815	0.00126848	0.000146917	0.0211255
MAP1S;767;	0.00670642	7.53631e-05	0.000580106	1.32119e-05	0.969787	7.85728e-05	6.16376e-05	0.000156815	0.00126848	0.000146917	0.0211255
MAP1S;472;	5.45511e-05	1.85128e-05	6.66703e-05	2.95017e-05	0.00543691	1.17784e-05	0.00403773	0.000283371	0.974317	0.0133627	0.00238111
MAP1S;809;	7.4591e-06	1.2296e-07	5.41436e-05	4.06299e-08	0.999921	5.49974e-07	4.57927e-07	8.49539e-07	1.26248e-05	2.18239e-07	2.53527e-06
RYBP;99;	2.23695e-06	2.24657e-06	3.05675e-05	3.50119e-05	3.09185e-05	6.46253e-06	0.996426	2.23176e-05	0.00320961	0.000218557	1.598e-05
RYBP;101;	1.31655e-05	3.04122e-05	0.000126364	0.00203193	5.77428e-05	6.69594e-05	0.994049	0.000238329	0.0015061	0.0018216	5.81347e-05
LUZP1;569;	0.998946	0.000246587	8.61786e-05	3.86876e-06	0.000393094	5.16772e-05	2.49703e-06	0.000119073	9.99932e-06	8.47628e-06	0.000132232
LUZP1;570;	0.998946	0.000246587	8.61786e-05	3.86876e-06	0.000393094	5.16772e-05	2.49703e-06	0.000119073	9.99932e-06	8.47628e-06	0.000132232
LUZP1;573;	0.998946	0.000246587	8.61786e-05	3.86876e-06	0.000393094	5.16772e-05	2.49703e-06	0.000119073	9.99932e-06	8.47628e-06	0.000132232
LUZP1;574;	0.998946	0.000246587	8.61786e-05	3.86876e-06	0.000393094	5.16772e-05	2.49703e-06	0.000119073	9.99932e-06	8.47628e-06	0.000132232
LUZP1;575;	0.998946	0.000246587	8.61786e-05	3.86876e-06	0.000393094	5.16772e-05	2.49703e-06	0.000119073	9.99932e-06	8.47628e-06	0.000132232
LUZP1;579;	0.998946	0.000246587	8.61786e-05	3.86876e-06	0.000393094	5.16772e-05	2.49703e-06	0.000119073	9.99932e-06	8.47628e-06	0.000132232
LUZP1;1042;	1.52135e-06	1.3934e-06	2.59985e-06	8.84064e-07	3.18763e-06	4.84903e-07	3.62244e-06	0.999979	3.96994e-06	3.40961e-06	3.15148e-07
NKAP;7;	0.000104604	6.98595e-06	0.00150243	4.42083e-06	0.981991	1.79883e-05	0.0001995	0.000338074	0.015722	4.57606e-05	6.76666e-05
PTPN1;378;	0.017738	0.000301315	0.946246	3.25746e-05	0.00106911	0.0341539	2.55714e-05	0.000295982	5.28713e-05	1.34914e-05	7.15674e-05
ARFGAP2;432;	1.09627e-05	0.00189134	3.86025e-06	0.997811	1.94716e-06	3.86113e-05	1.64736e-05	3.68946e-05	3.50762e-06	0.000161392	2.43821e-05
ARFGAP2;433;	0.000215275	0.0711791	4.84938e-05	0.92586	2.46993e-05	0.000685915	0.00011153	0.000306308	3.29244e-05	0.00109981	0.000435967
PHLPP;411;	3.24609e-05	2.96448e-05	1.9771e-05	6.92777e-05	0.0003811	8.20519e-06	0.00242334	0.000263152	0.0110057	0.983267	0.0025006
PHLPP;412;	0.000337476	0.000188844	0.000206264	0.000297775	0.00790902	6.39838e-05	0.0130098	0.00206205	0.218982	0.731789	0.0251534
RBM6;360;	0.00264022	0.000914073	0.119857	0.00155788	0.0687919	0.00251262	0.12912	0.421823	0.24578	0.00587789	0.00112463
RBM6;362;	0.00127313	0.000281562	0.267219	0.000683869	0.106855	0.00282798	0.106047	0.00358787	0.507163	0.00205981	0.0020029
PPL;887;	0.53135	0.0149257	0.0117424	0.000550598	0.00208864	0.4295	0.000105388	0.00034566	0.000187772	0.000166567	0.00903728
PPL;1657;	0.959319	0.00147548	0.00971234	8.15651e-05	0.0051024	0.0172699	4.6006e-05	0.000157794	0.000148333	6.65881e-05	0.00662049
ILF3;814;	1.41729e-07	3.59058e-08	1.94852e-06	8.49301e-08	4.90948e-05	8.822e-08	9.48216e-05	8.97167e-07	0.99985	2.25082e-06	8.60486e-07
ILF3;816;	1.41729e-07	3.59058e-08	1.94852e-06	8.49301e-08	4.90948e-05	8.822e-08	9.48216e-05	8.97167e-07	0.99985	2.25082e-06	8.60486e-07
ILF3;56;	3.00357e-07	2.32304e-07	4.94825e-06	2.03127e-06	7.78876e-06	5.30127e-07	0.996732	8.63212e-06	0.00321537	2.68437e-05	1.22916e-06
ILF3;57;	3.00357e-07	2.32304e-07	4.94825e-06	2.03127e-06	7.78876e-06	5.30127e-07	0.996732	8.63212e-06	0.00321537	2.68437e-05	1.22916e-06
ILF3;73;	3.00357e-07	2.32304e-07	4.94825e-06	2.03127e-06	7.78876e-06	5.30127e-07	0.996732	8.63212e-06	0.00321537	2.68437e-05	1.22916e-06
TAF5;511;	9.65828e-05	0.00886152	3.6961e-05	0.980623	2.69448e-05	0.000157751	0.000364339	0.00193305	6.63632e-05	0.00764227	0.000191023
TAF5;514;	0.000520802	0.148096	0.000106242	0.835984	7.91435e-05	0.000666203	0.000444326	0.00341942	0.00012753	0.00969426	0.000861522
TLN1;417;	1.24443e-07	1.67729e-07	5.29759e-07	2.38983e-06	1.63955e-06	1.49739e-07	0.999026	4.11903e-06	0.000534749	0.00042865	1.29734e-06
TLN1;423;	1.24443e-07	1.67729e-07	5.29759e-07	2.38983e-06	1.63955e-06	1.49739e-07	0.999026	4.11903e-06	0.000534749	0.00042865	1.29734e-06
TLN1;425;	5.72533e-08	8.06223e-08	2.56748e-07	1.24998e-06	7.05954e-07	7.33039e-08	0.999626	2.10041e-06	0.000197103	0.000172254	5.36524e-07
BASP1;194;	3.70318e-06	1.03946e-06	1.43891e-05	1.64118e-06	0.000897977	1.02217e-06	0.000681363	0.000104659	0.998136	0.000142957	1.57369e-05
BASP1;195;	3.70318e-06	1.03946e-06	1.43891e-05	1.64118e-06	0.000897977	1.02217e-06	0.000681363	0.000104659	0.998136	0.000142957	1.57369e-05
BASP1;164;	1.12455e-06	2.5888e-05	1.26291e-06	0.999737	6.56225e-07	5.37078e-06	3.99527e-05	1.0194e-05	2.84829e-06	0.000170608	4.96451e-06
BASP1;177;	1.51645e-05	0.000182752	3.27551e-05	0.992084	1.49328e-05	7.98391e-05	0.00358697	0.000312947	0.00010238	0.00353458	5.40036e-05
PODXL;519;	5.66954e-05	0.999052	3.32565e-06	0.00074257	1.51252e-06	8.90274e-05	1.70904e-06	1.48683e-05	9.36791e-07	1.30539e-05	2.39745e-05
PODXL;520;	5.66954e-05	0.999052	3.32565e-06	0.00074257	1.51252e-06	8.90274e-05	1.70904e-06	1.48683e-05	9.36791e-07	1.30539e-05	2.39745e-05
EIF5B;107;	0.000425826	0.175396	9.95235e-05	0.819727	3.68386e-05	0.00247712	0.00012691	0.000349738	4.04265e-05	0.000755282	0.000565214
EIF5B;113;	0.00030946	0.228895	7.28329e-05	0.767662	2.46135e-05	0.0018228	8.53811e-05	0.000341621	2.64585e-05	0.000479213	0.000280341
NCAPD2;1366;	0.998473	0.00107322	5.42516e-05	5.87567e-06	9.52494e-05	7.83193e-05	1.91199e-06	0.000125904	5.17008e-06	7.41849e-06	7.94622e-05
NCAPD2;1367;	0.998473	0.00107322	5.42516e-05	5.87567e-06	9.52494e-05	7.83193e-05	1.91199e-06	0.000125904	5.17008e-06	7.41849e-06	7.94622e-05
NCAPD2;1370;	0.998473	0.00107322	5.42516e-05	5.87567e-06	9.52494e-05	7.83193e-05	1.91199e-06	0.000125904	5.17008e-06	7.41849e-06	7.94622e-05
NCAPD2;1371;	0.998473	0.00107322	5.42516e-05	5.87567e-06	9.52494e-05	7.83193e-05	1.91199e-06	0.000125904	5.17008e-06	7.41849e-06	7.94622e-05
NCAPD2;1333;	0.00873444	0.000166992	0.0400019	3.72983e-05	0.940895	0.000422428	0.000269155	0.00574754	0.00314396	0.000151882	0.000429847
BIRC6;480;	0.999353	5.5773e-05	0.000120099	1.59586e-06	0.000145289	0.000160942	8.64451e-07	5.82921e-06	3.10805e-06	1.70219e-06	0.000151413
BIRC6;482;	0.999353	5.5773e-05	0.000120099	1.59586e-06	0.000145289	0.000160942	8.64451e-07	5.82921e-06	3.10805e-06	1.70219e-06	0.000151413
BIRC6;486;	0.999353	5.5773e-05	0.000120099	1.59586e-06	0.000145289	0.000160942	8.64451e-07	5.82921e-06	3.10805e-06	1.70219e-06	0.000151413
BIRC6;488;	0.99687	0.00122881	0.000128028	1.10788e-05	7.66725e-05	0.00124017	2.18716e-06	1.65902e-05	4.85291e-06	5.88947e-06	0.00041538
BIRC6;490;	0.99687	0.00122881	0.000128028	1.10788e-05	7.66725e-05	0.00124017	2.18716e-06	1.65902e-05	4.85291e-06	5.88947e-06	0.00041538
BIRC6;577;	0.000189071	0.999767	1.08242e-06	4.86039e-06	4.51021e-07	3.06176e-05	1.13588e-07	2.57852e-06	1.13212e-07	5.68434e-07	3.3394e-06
BIRC6;581;	8.68082e-06	0.999987	9.00079e-08	7.84445e-07	3.6163e-08	2.77498e-06	1.23382e-08	2.61462e-07	1.08833e-08	6.52801e-08	2.93847e-07
BIRC6;584;	0.000189071	0.999767	1.08242e-06	4.86039e-06	4.51021e-07	3.06176e-05	1.13588e-07	2.57852e-06	1.13212e-07	5.68434e-07	3.3394e-06
BIRC6;585;	0.000189071	0.999767	1.08242e-06	4.86039e-06	4.51021e-07	3.06176e-05	1.13588e-07	2.57852e-06	1.13212e-07	5.68434e-07	3.3394e-06
ERBB2;998;	0.000687734	0.000143445	0.792832	0.000105196	0.000379284	0.205466	9.08438e-05	0.000106417	9.03893e-05	2.03749e-05	7.80721e-05
ERBB2;1054;	0.000478877	0.000400965	0.000124921	0.000357582	0.00297984	5.73416e-05	0.00289723	0.004383	0.0145638	0.956974	0.0167822
SAFB;601;	0.00285863	0.167113	0.000755373	0.792432	0.000337098	0.0172831	0.00100456	0.00106016	0.000371342	0.00542421	0.0113614
SAFB;604;	0.00111309	0.0485814	0.000409972	0.931164	0.000180422	0.00768916	0.000786286	0.000602188	0.000242133	0.00390201	0.00532974
PBRM1;636;	2.57122e-09	2.60373e-09	2.07508e-08	2.98511e-08	4.98335e-08	3.74055e-09	0.99997	8.18155e-08	2.83762e-05	1.19234e-06	1.7331e-08
PBRM1;177;	0.00131621	4.42232e-05	8.1413e-05	8.79525e-06	0.00599478	3.49974e-05	2.21564e-05	2.53031e-05	0.000229427	9.31487e-05	0.99215
PBRM1;178;	0.00131621	4.42232e-05	8.1413e-05	8.79525e-06	0.00599478	3.49974e-05	2.21564e-05	2.53031e-05	0.000229427	9.31487e-05	0.99215
PBRM1;1116;	0.000115089	0.000467314	0.000635742	0.108735	0.000281831	0.00064365	0.857506	0.00221993	0.00430857	0.0245815	0.000505731
PBRM1;1119;	0.000115089	0.000467314	0.000635742	0.108735	0.000281831	0.00064365	0.857506	0.00221993	0.00430857	0.0245815	0.000505731
PBRM1;39;	0.00556299	0.00924794	0.442536	0.0879819	0.0088795	0.143684	0.171685	0.0990336	0.0209014	0.00831549	0.00217226
CAD;1859;	0.000537076	1.23642e-05	0.000236236	2.79197e-06	0.997877	1.17642e-05	2.67466e-05	0.000278404	0.000803101	3.69878e-05	0.000177552
ZC3HC1;53;	0.0148736	0.00127417	0.336256	0.00120461	0.478626	0.0196315	0.0110579	0.00182228	0.0718408	0.00275862	0.0606551
ZC3HC1;56;	0.0148736	0.00127417	0.336256	0.00120461	0.478626	0.0196315	0.0110579	0.00182228	0.0718408	0.00275862	0.0606551
ZC3HC1;58;	0.0187737	0.00132345	0.332732	0.00104974	0.497103	0.0211395	0.00758656	0.0016378	0.0493308	0.00229235	0.0670311
ZC3HC1;62;	0.0161758	0.00136021	0.335362	0.00125252	0.474274	0.0211197	0.0107382	0.00184361	0.0681752	0.00281525	0.0668835
ZC3HC1;407;	0.0259546	0.00747143	0.376682	0.0151402	0.0989704	0.188043	0.0499741	0.0047764	0.0717111	0.0119608	0.149315
ZC3HC1;408;	0.0259546	0.00747143	0.376682	0.0151402	0.0989704	0.188043	0.0499741	0.0047764	0.0717111	0.0119608	0.149315
ZC3HC1;409;	0.0259546	0.00747143	0.376682	0.0151402	0.0989704	0.188043	0.0499741	0.0047764	0.0717111	0.0119608	0.149315
ZC3HC1;24;	0.000483167	0.000447173	0.00075471	0.00265598	0.00555056	0.000366141	0.179741	0.00122159	0.223419	0.512419	0.0729424
ZC3HC1;394;	7.09867e-05	2.65723e-05	0.000207808	7.56452e-05	0.00500179	3.81668e-05	0.0181911	0.000149193	0.964945	0.00618466	0.00510958
ZC3HC1;395;	7.09867e-05	2.65723e-05	0.000207808	7.56452e-05	0.00500179	3.81668e-05	0.0181911	0.000149193	0.964945	0.00618466	0.00510958
ZC3HC1;344;	0.018436	0.00411771	0.204906	0.00333226	0.0104062	0.735715	0.00225701	0.000957144	0.00283508	0.000956888	0.0160811
ZC3HC1;338;	0.0173323	0.921081	0.000675707	0.0147706	0.000378296	0.022531	0.000200657	0.000603248	0.000163043	0.00119485	0.0210695
ZC3HC1;354;	6.47938e-07	3.56096e-07	2.48681e-06	6.28268e-08	2.56874e-08	0.999996	6.86612e-09	2.11047e-08	5.78492e-09	4.43864e-09	2.62368e-08
ZC3HC1;357;	0.00129461	0.000170951	0.812184	0.000255048	0.111038	0.00287727	0.0100541	0.00127759	0.0590552	0.000545669	0.00124812
ZC3HC1;358;	0.00170466	0.000351382	0.520196	0.000799336	0.111718	0.00457376	0.0725254	0.00337205	0.280463	0.00188757	0.00240899
ZC3HC1;359;	0.00267803	0.000396877	0.830885	0.000354258	0.084004	0.00249798	0.00821432	0.0396876	0.0300317	0.000754319	0.000496197
ZC3HC1;370;	0.00169759	0.000324991	0.587553	0.000687295	0.117518	0.00443138	0.0534756	0.00299666	0.227462	0.00159569	0.00225782
SFRS10;252;	3.46978e-06	2.51384e-06	1.46733e-05	1.33825e-05	0.000131677	2.35059e-06	0.291322	0.000106024	0.704827	0.00354048	3.59717e-05
ELAVL1;197;	2.77618e-05	4.64257e-05	1.08698e-05	0.000133792	0.000102279	8.7126e-06	0.000651194	9.41909e-05	0.000906837	0.991532	0.00648567
ELAVL1;202;	3.21152e-05	3.09939e-05	1.84136e-05	7.54439e-05	0.000324177	8.47624e-06	0.00202069	0.000198554	0.00763594	0.986109	0.0035467
AATF;316;	0.973548	0.00469608	0.000806509	4.93034e-05	0.000205339	0.0199005	8.11404e-06	5.74738e-05	1.52912e-05	1.68135e-05	0.000696787
AATF;320;	0.973699	0.00676937	0.000765489	6.72219e-05	0.000254256	0.0170633	1.05505e-05	6.90173e-05	2.00036e-05	2.42804e-05	0.00125759
AATF;321;	0.973699	0.00676937	0.000765489	6.72219e-05	0.000254256	0.0170633	1.05505e-05	6.90173e-05	2.00036e-05	2.42804e-05	0.00125759
FLNA;1081;	5.83464e-06	9.27196e-07	8.07266e-05	1.44529e-06	0.00785758	2.60277e-06	0.000407113	1.73216e-05	0.991566	2.92505e-05	3.16188e-05
FLNA;1084;	2.59037e-07	5.69805e-09	1.2496e-06	2.16174e-09	0.999997	2.00432e-08	3.18605e-08	4.21339e-08	1.37054e-06	1.60377e-08	1.97306e-07
FLNA;2152;	0.000101944	0.000504707	0.000111516	3.66622e-05	2.40111e-06	0.999226	1.20757e-06	1.05793e-05	7.52987e-07	1.07037e-06	2.79804e-06
FLNA;2158;	0.000870928	0.00356665	0.000317073	7.84673e-05	9.29826e-06	0.995099	3.05903e-06	3.84318e-05	2.29952e-06	3.39319e-06	1.12736e-05
FLNA;2163;	0.000870928	0.00356665	0.000317073	7.84673e-05	9.29826e-06	0.995099	3.05903e-06	3.84318e-05	2.29952e-06	3.39319e-06	1.12736e-05
FLNA;1459;	6.28951e-05	2.5754e-06	0.00264329	1.552e-06	0.995673	1.60473e-05	3.82751e-05	2.31781e-05	0.00147922	8.39686e-06	5.12874e-05
FLNA;2327;	9.56412e-06	3.74478e-07	7.66333e-05	2.10792e-07	0.999549	1.49249e-06	4.99642e-06	2.44052e-06	0.000331688	1.81404e-06	2.17862e-05
FLNA;2170;	0.00168343	0.00909744	0.000535059	0.000917309	4.3084e-05	0.987358	2.13328e-05	5.30014e-05	1.47851e-05	2.98503e-05	0.000247055
FLNA;2180;	0.00168343	0.00909744	0.000535059	0.000917309	4.3084e-05	0.987358	2.13328e-05	5.30014e-05	1.47851e-05	2.98503e-05	0.000247055
FLNA;2182;	0.00168343	0.00909744	0.000535059	0.000917309	4.3084e-05	0.987358	2.13328e-05	5.30014e-05	1.47851e-05	2.98503e-05	0.000247055
RNUXA;14;	0.0623609	0.553053	0.00180188	0.0177884	0.00661914	0.00320145	0.00281958	0.160323	0.00388276	0.125583	0.0625668
RNUXA;16;	0.00662358	0.0267123	0.000763657	0.00582021	0.00324793	0.000673203	0.00312646	0.795365	0.00385203	0.147019	0.00679651
AEBP2;390;	0.000201568	2.55064e-05	0.00902461	3.23297e-05	0.289101	0.000101529	0.00504025	0.000813723	0.695055	0.000303219	0.000301208
CARHSP1;30;	2.37189e-05	2.57109e-05	1.02332e-05	4.91763e-05	0.000175216	5.07812e-06	0.000737948	0.000192722	0.00242771	0.994583	0.00176935
CARHSP1;32;	1.5869e-05	1.84375e-05	6.85946e-06	3.72023e-05	0.000108517	3.5305e-06	0.000524091	0.00013417	0.00150266	0.996494	0.00115511
CARHSP1;41;	0.000780545	0.000435375	0.000286687	0.000525436	0.00992096	0.00012305	0.00746162	0.00178287	0.0717294	0.664136	0.242818
CARHSP1;26;	3.56596e-06	2.11923e-06	9.55714e-06	7.43181e-06	0.000183038	1.59074e-06	0.0152509	7.60751e-05	0.98018	0.00423152	5.46353e-05
CARHSP1;17;	6.97749e-06	4.61348e-06	1.81831e-05	1.79967e-05	0.000292074	3.30036e-06	0.0436612	0.000163289	0.942751	0.0129728	0.000108752
TNKS1BP1;872;	0.00238615	0.0767256	0.000546927	0.174566	0.000886361	0.00111698	0.00621479	0.132242	0.00213419	0.597832	0.00534947
TNKS1BP1;1024;	0.00361722	6.65556e-05	0.984066	1.58584e-05	0.00210553	0.00984122	2.44146e-05	5.16001e-05	7.20029e-05	1.00358e-05	0.000129296
TNKS1BP1;1029;	0.00265466	0.000212732	0.258202	5.56282e-05	0.000372992	0.738247	3.03253e-05	6.68035e-05	4.30033e-05	1.27135e-05	0.000102141
TNKS1BP1;1031;	2.57661e-05	1.91183e-05	0.000925246	1.08634e-05	3.41092e-06	0.999006	1.75962e-06	4.02748e-06	1.12625e-06	6.5861e-07	1.95945e-06
TNKS1BP1;429;	0.00131891	0.383311	0.000633537	0.586	0.000131653	0.00710217	0.000544293	0.0190355	0.00014419	0.00147622	0.000302574
TNKS1BP1;1383;	3.21805e-06	6.74898e-06	1.47228e-05	1.73565e-06	1.64674e-07	0.999973	9.42809e-08	4.10612e-07	5.58435e-08	5.73319e-08	1.59016e-07
TNKS1BP1;1385;	0.00196501	0.0708771	0.0029402	0.232598	0.000177196	0.688403	0.000489358	0.00146886	0.00014337	0.000462429	0.000475577
TNKS1BP1;494;	0.000673891	0.00125037	0.000302364	0.00506404	0.00157274	0.000374228	0.00883745	0.00077163	0.00818834	0.529777	0.443188
TNKS1BP1;498;	7.57939e-08	7.1533e-08	9.34669e-07	9.13593e-07	1.38778e-06	1.59173e-07	0.99961	1.29042e-06	0.000373166	1.20087e-05	4.91102e-07
TNKS1BP1;518;	7.57939e-08	7.1533e-08	9.34669e-07	9.13593e-07	1.38778e-06	1.59173e-07	0.99961	1.29042e-06	0.000373166	1.20087e-05	4.91102e-07
TNKS1BP1;519;	7.57939e-08	7.1533e-08	9.34669e-07	9.13593e-07	1.38778e-06	1.59173e-07	0.99961	1.29042e-06	0.000373166	1.20087e-05	4.91102e-07
TNKS1BP1;1666;	9.74794e-05	0.000397274	0.000686905	0.000535607	1.15112e-05	0.99819	1.68121e-05	3.52284e-05	6.61565e-06	8.11517e-06	1.4659e-05
TNKS1BP1;893;	0.000619943	0.00472542	0.00181282	0.124443	0.000653115	0.00163563	0.0449836	0.795249	0.00306547	0.022374	0.000437489
TNKS1BP1;899;	0.000552914	0.00430726	0.00156256	0.091245	0.000541862	0.00142742	0.0290058	0.852998	0.00229734	0.0157122	0.000349386
TNKS1BP1;836;	0.000662854	0.635709	0.000225814	0.353074	4.0626e-05	0.00838506	0.00011657	0.00125281	3.6047e-05	0.000328535	0.000168553
TNKS1BP1;601;	0.0400804	0.00106012	0.72368	0.000211717	0.187111	0.00450963	0.000849369	0.0371595	0.00415231	0.000388963	0.0007976
RBMX;328;	0.866934	0.0635455	0.00138485	0.000315913	0.000411856	0.0642103	2.97902e-05	0.000214098	4.6288e-05	7.76544e-05	0.00282986
HRB;179;	0.000377291	0.00270954	9.23888e-05	0.00412377	0.000333489	9.8483e-05	0.00198819	0.0300089	0.00113834	0.957467	0.00166281
HRB;181;	0.000377291	0.00270954	9.23888e-05	0.00412377	0.000333489	9.8483e-05	0.00198819	0.0300089	0.00113834	0.957467	0.00166281
WIBG;6;	2.44705e-05	2.37349e-05	5.79276e-05	0.000158012	0.000500505	1.60301e-05	0.471096	0.000409308	0.301124	0.225985	0.000605541
TSSC4;143;	8.05109e-05	1.19115e-05	0.00284704	1.70403e-05	0.0868711	4.22041e-05	0.0039174	0.000418871	0.905454	0.000191636	0.00014816
TSSC4;146;	8.05109e-05	1.19115e-05	0.00284704	1.70403e-05	0.0868711	4.22041e-05	0.0039174	0.000418871	0.905454	0.000191636	0.00014816
SEC31A;799;	2.65163e-07	9.52359e-09	5.47239e-07	4.21223e-09	0.999989	1.87954e-08	9.23972e-08	9.51177e-08	9.26748e-06	6.36236e-08	6.40488e-07
SEC31A;521;	7.28676e-05	0.999744	2.06404e-06	6.53685e-05	7.83602e-07	9.6449e-05	4.49742e-07	4.17546e-06	3.21552e-07	2.46655e-06	1.14699e-05
SEC31A;527;	7.28676e-05	0.999744	2.06404e-06	6.53685e-05	7.83602e-07	9.6449e-05	4.49742e-07	4.17546e-06	3.21552e-07	2.46655e-06	1.14699e-05
SEC31A;532;	7.28676e-05	0.999744	2.06404e-06	6.53685e-05	7.83602e-07	9.6449e-05	4.49742e-07	4.17546e-06	3.21552e-07	2.46655e-06	1.14699e-05
YTHDF2;394;	7.53396e-05	2.25759e-05	0.0037992	8.64583e-06	9.43336e-06	0.99607	2.35401e-06	4.97639e-06	2.09477e-06	9.3383e-07	4.49848e-06
DENR;74;	0.000119954	1.26384e-05	0.00305064	1.43519e-05	0.503498	4.73168e-05	0.0017184	0.00024112	0.490841	0.000165275	0.000291762
PDHA1;270;	0.899586	0.0105255	0.046208	0.000249718	0.00322386	0.0314191	0.000101472	0.00792832	0.000197631	0.000116853	0.000443515
NSUN2;473;	0.383576	0.000665584	0.573037	5.91965e-05	0.0269627	0.0138487	7.78973e-05	0.000706507	0.000307954	5.60056e-05	0.000702515
CCDC94;211;	3.96501e-05	4.59411e-06	0.00033651	5.28123e-06	0.179058	1.16708e-05	0.000675591	6.59244e-05	0.819433	0.000114238	0.000256315
CCDC94;213;	3.96501e-05	4.59411e-06	0.00033651	5.28123e-06	0.179058	1.16708e-05	0.000675591	6.59244e-05	0.819433	0.000114238	0.000256315
CCDC94;220;	6.94951e-05	7.27979e-06	0.000746301	7.96563e-06	0.420896	2.11469e-05	0.000872516	0.000100195	0.576785	0.000138135	0.000356276
NCK2;94;	3.90863e-09	5.72044e-09	3.15576e-08	1.06189e-07	4.135e-08	7.35563e-09	0.999992	2.50629e-07	5.72223e-06	1.86665e-06	1.70515e-08
CGNL1;296;	1.54568e-05	1.14121e-05	0.000212791	0.000113138	0.000335667	3.54708e-05	0.946072	9.81365e-05	0.0519076	0.00105198	0.000146523
CGNL1;297;	8.5011e-05	7.31517e-05	0.00101032	0.000909384	0.00114842	0.0002572	0.930094	0.000351061	0.0603526	0.00473158	0.000987566
CGNL1;298;	0.000117513	7.61789e-05	0.00184555	0.00064999	0.00248759	0.000307844	0.819615	0.000444057	0.16927	0.00397946	0.00120677
CGNL1;299;	1.54568e-05	1.14121e-05	0.000212791	0.000113138	0.000335667	3.54708e-05	0.946072	9.81365e-05	0.0519076	0.00105198	0.000146523
CGNL1;300;	2.40094e-07	2.29673e-07	3.12931e-06	3.11755e-06	4.06723e-06	5.60076e-07	0.999148	3.44026e-06	0.000804145	3.1861e-05	1.58966e-06
RAB34;264;	7.69999e-05	6.02134e-06	0.996054	4.78062e-06	0.00325589	0.000133381	6.70097e-05	6.52455e-05	0.000313263	7.04412e-06	1.60364e-05
SRRM1;757;	5.18802e-07	1.20615e-05	1.0752e-06	0.999941	2.66096e-07	5.40332e-06	1.53415e-05	8.15099e-06	9.43292e-07	1.46306e-05	8.16398e-07
SRRM1;759;	6.13098e-07	1.27038e-05	1.30627e-06	0.999922	3.44214e-07	6.14568e-06	2.35694e-05	8.91868e-06	1.32124e-06	2.16545e-05	1.12345e-06
SRRM1;800;	4.74218e-06	3.31192e-06	1.87305e-05	1.87148e-05	0.000179886	3.45145e-06	0.214248	6.55378e-05	0.780522	0.0048484	8.70744e-05
SRRM1;804;	9.22749e-06	7.40629e-06	4.621e-05	6.11199e-05	0.000235123	1.0299e-05	0.817709	7.87129e-05	0.176157	0.00549146	0.000194746
SRRM1;397;	1.0811e-05	2.42169e-06	3.33205e-05	3.03049e-06	0.00444779	2.29919e-06	0.000678529	0.000193244	0.994327	0.000253201	4.84018e-05
SRRM1;409;	0.000431485	0.00400885	6.67061e-05	0.00533056	0.00025722	0.000111213	0.000986737	0.00277931	0.000668303	0.976902	0.00845736
SRRM1;415;	0.000544187	0.0122122	0.000122977	0.0701109	0.000255376	0.000294929	0.00223089	0.00467659	0.000763929	0.902845	0.00594256
SRRM1;778;	3.50293e-05	1.02117e-05	5.82338e-05	1.32979e-05	0.00578865	6.5949e-06	0.00229071	0.000628133	0.987957	0.00291983	0.000291826
SRRM1;782;	2.2885e-05	6.29209e-06	5.32233e-05	8.3176e-06	0.00475507	4.75745e-06	0.00181033	0.000584075	0.991536	0.00110094	0.000118052
SRRM1;784;	3.13087e-05	9.70134e-06	5.4832e-05	1.33162e-05	0.00458493	6.236e-06	0.00259298	0.000671307	0.988773	0.00301823	0.000243681
SRRM1;786;	3.01462e-05	1.17408e-05	7.04643e-05	1.99767e-05	0.0028015	7.73938e-06	0.00668237	0.00152323	0.984717	0.00398003	0.000155743
SRRM1;790;	6.3205e-05	4.98582e-05	4.34679e-05	0.000109045	0.00100853	1.52772e-05	0.00576025	0.000629249	0.0410404	0.947752	0.00352877
SRRM1;447;	6.33835e-05	5.99846e-06	0.000201096	5.00195e-06	0.702837	9.92926e-06	0.000356376	8.86902e-05	0.295754	0.00016427	0.000514359
SRRM1;625;	5.5889e-07	9.71767e-08	3.0239e-06	1.33977e-07	0.000743209	1.56029e-07	3.6423e-05	2.69811e-06	0.999203	6.28796e-06	4.02718e-06
SRRM1;592;	0.00214229	0.0003592	0.000991972	0.000255475	0.242564	0.000207037	0.00565428	0.0019412	0.363636	0.0350161	0.347233
SRRM1;761;	0.000625261	0.000198088	0.000328006	0.000231939	0.0153263	0.000119733	0.00372991	0.000442579	0.0617249	0.033619	0.883654
SRRM1;763;	0.000625261	0.000198088	0.000328006	0.000231939	0.0153263	0.000119733	0.00372991	0.000442579	0.0617249	0.033619	0.883654
SRRM1;765;	0.000625261	0.000198088	0.000328006	0.000231939	0.0153263	0.000119733	0.00372991	0.000442579	0.0617249	0.033619	0.883654
SRRM1;421;	0.00015355	0.00138033	8.48145e-05	0.0626922	0.000155685	0.000182341	0.00542473	0.000752757	0.000936447	0.923258	0.00497893
SRRM1;260;	0.000115438	3.5237e-05	0.000193643	4.29311e-05	0.0144031	2.09948e-05	0.0062155	0.00397398	0.966831	0.00758806	0.00058034
ZC3H11A;290;	0.00222106	0.00132099	0.276887	0.00304017	0.00173782	0.709706	0.00198983	0.000774646	0.00106493	0.000339678	0.000917787
ZC3H11A;295;	0.00222106	0.00132099	0.276887	0.00304017	0.00173782	0.709706	0.00198983	0.000774646	0.00106493	0.000339678	0.000917787
ZC3H11A;758;	0.00175445	0.000182185	0.949743	0.000131642	0.00289511	0.0439062	0.000256478	0.000148759	0.000452827	5.84886e-05	0.000471298
ZC3H11A;759;	4.74753e-05	6.71801e-06	0.998102	5.75366e-06	9.02477e-05	0.00169369	1.3882e-05	1.22658e-05	1.88552e-05	2.12898e-06	7.10852e-06
ZC3H11A;761;	0.0200525	0.00182159	0.621205	0.00100049	0.0171093	0.325625	0.00122136	0.000705275	0.00234349	0.000460052	0.00845565
ZC3H11A;108;	0.00213265	0.996891	1.63106e-05	0.000178972	1.39963e-05	0.000251667	4.18051e-06	4.61528e-05	4.383e-06	3.78594e-05	0.00042233
MTDH;298;	0.00994454	0.877515	0.000498562	0.000797263	4.83859e-05	0.110678	1.64909e-05	0.000343125	1.27988e-05	3.37967e-05	0.000112651
USP48;886;	0.671092	0.0446558	0.00540171	0.00110324	0.0309818	0.00288594	0.000807086	0.224841	0.00270785	0.00450838	0.0110155
ZC3H18;532;	1.16041e-05	0.00016192	1.85587e-05	0.998076	8.05764e-06	8.43071e-05	0.000543813	5.79354e-05	3.61386e-05	0.000937593	6.39351e-05
ZC3H18;536;	3.22818e-08	9.58105e-07	4.68829e-08	0.999996	1.5117e-08	2.54482e-07	7.36219e-07	3.95634e-07	5.27804e-08	1.3627e-06	6.70278e-08
ZC3H18;78;	0.000319815	0.0240349	0.0003375	0.952596	3.82707e-05	0.0215915	0.000188674	0.000441229	4.28742e-05	0.000253534	0.000156124
ZC3H18;83;	0.000319815	0.0240349	0.0003375	0.952596	3.82707e-05	0.0215915	0.000188674	0.000441229	4.28742e-05	0.000253534	0.000156124
DNMT3A;267;	1.34118e-05	8.66614e-06	0.000301104	5.06231e-05	0.000417663	2.02322e-05	0.912011	0.000765908	0.0858702	0.000511041	2.98826e-05
PCYT1A;315;	3.33543e-05	8.81538e-06	9.38311e-07	1.2168e-06	1.21203e-05	1.30297e-06	8.27393e-07	1.35423e-06	3.10439e-06	1.46269e-05	0.999922
PCYT1A;319;	3.49761e-06	1.33255e-06	2.3808e-07	3.99571e-07	3.74963e-06	2.63906e-07	4.42626e-07	3.84096e-07	1.79314e-06	1.03461e-05	0.999978
PCYT1A;321;	3.49761e-06	1.33255e-06	2.3808e-07	3.99571e-07	3.74963e-06	2.63906e-07	4.42626e-07	3.84096e-07	1.79314e-06	1.03461e-05	0.999978
PCYT1A;322;	3.49761e-06	1.33255e-06	2.3808e-07	3.99571e-07	3.74963e-06	2.63906e-07	4.42626e-07	3.84096e-07	1.79314e-06	1.03461e-05	0.999978
PCYT1A;323;	3.49761e-06	1.33255e-06	2.3808e-07	3.99571e-07	3.74963e-06	2.63906e-07	4.42626e-07	3.84096e-07	1.79314e-06	1.03461e-05	0.999978
RBM26;608;	0.9959	0.00084222	0.0001811	6.51591e-06	3.62206e-05	0.00295736	1.19282e-06	1.41494e-05	2.30936e-06	2.3113e-06	5.63268e-05
RBM26;616;	0.9959	0.00084222	0.0001811	6.51591e-06	3.62206e-05	0.00295736	1.19282e-06	1.41494e-05	2.30936e-06	2.3113e-06	5.63268e-05
PACSIN3;355;	8.22921e-05	2.20751e-05	9.30748e-05	2.81175e-05	0.0129258	1.44973e-05	0.00283299	0.000351655	0.972269	0.00830723	0.0030736
NUP35;73;	8.78939e-06	5.89011e-06	2.17084e-05	2.29607e-05	0.000353765	4.09593e-06	0.0479763	0.000194094	0.932203	0.019061	0.000148374
MYO1E;736;	0.999588	0.000283294	1.06852e-05	1.00236e-06	5.27379e-06	9.46696e-05	1.69923e-07	2.76659e-06	3.49688e-07	4.78895e-07	1.34893e-05
MYO1E;1003;	1.71828e-07	0.999999	6.30901e-09	2.52539e-07	2.13814e-09	1.79888e-07	1.49823e-09	3.87424e-08	9.6122e-10	8.02183e-09	1.349e-08
NMT1;47;	4.02041e-05	7.13439e-06	0.000638843	9.76837e-06	0.028229	1.52772e-05	0.0026983	0.000596366	0.967516	0.000180732	6.79331e-05
DDX46;804;	0.00137372	0.00499528	0.000216147	0.00652527	0.000728992	0.000581206	0.00118627	0.000538511	0.00114322	0.0540492	0.928662
CHERP;828;	0.00165529	0.00125643	0.00100717	0.00121042	0.0151895	0.000253103	0.0230477	0.538818	0.0937713	0.31942	0.00437119
CHERP;837;	0.000106827	6.17985e-05	0.0001546	0.000128641	0.00417822	2.80528e-05	0.0326291	0.00493253	0.841236	0.115513	0.00103136
C13orf3;155;	0.000128863	6.2882e-05	0.000829666	7.14818e-06	4.11583e-06	0.998955	9.68322e-07	8.3801e-06	8.2752e-07	5.80729e-07	1.88009e-06
C13orf3;152;	0.000582047	0.000129137	0.00534193	1.36849e-05	1.76116e-05	0.993879	2.73032e-06	2.38671e-05	2.76806e-06	1.58711e-06	6.08981e-06
TCEA1;97;	0.000105522	0.000138317	0.000493461	0.000473779	0.000627541	8.38299e-05	0.0241442	0.963436	0.00641853	0.00399516	8.41834e-05
TCEA1;100;	0.000116537	0.000248712	0.000444175	0.00143289	0.000433024	0.000119963	0.037989	0.946343	0.00439496	0.00837191	0.000106228
NAG;473;	0.000999935	3.01564e-05	0.996302	7.04734e-06	0.00170615	0.00055763	1.96226e-05	0.000291327	6.1811e-05	6.47441e-06	1.74385e-05
NAG;475;	0.000999935	3.01564e-05	0.996302	7.04734e-06	0.00170615	0.00055763	1.96226e-05	0.000291327	6.1811e-05	6.47441e-06	1.74385e-05
HNRNPAB;255;	8.45156e-06	2.89291e-06	3.23061e-07	5.08418e-07	3.31479e-06	5.08433e-07	3.14057e-07	3.83063e-07	1.03982e-06	5.14777e-06	0.999977
HNRNPAB;266;	4.04928e-06	1.44787e-06	1.83389e-07	2.95945e-07	1.93174e-06	2.77786e-07	1.98457e-07	2.12902e-07	6.63356e-07	3.28148e-06	0.999987
ANKZF1;398;	3.68945e-05	2.81154e-06	0.000569676	2.31969e-06	0.961071	8.69356e-06	0.000162436	6.07481e-05	0.0379908	2.89091e-05	6.57549e-05
PXN;258;	0.000543573	0.00022043	0.915074	0.000335735	0.000551579	0.0820579	0.000418913	0.000388419	0.000262781	5.44306e-05	9.22589e-05
PXN;126;	0.000361866	3.10486e-05	0.980737	8.37857e-06	8.25165e-05	0.018718	6.77257e-06	3.48837e-05	9.39753e-06	2.19761e-06	7.8297e-06
PXN;130;	0.000934192	0.000351719	0.974816	0.000294502	0.000830244	0.0186457	0.00043489	0.00323927	0.000320177	6.95524e-05	6.3944e-05
PXN;143;	0.000104521	1.3452e-05	0.995053	5.28566e-06	4.42627e-05	0.00473676	5.45585e-06	2.5744e-05	6.71795e-06	1.38073e-06	3.54186e-06
PRPF40A;933;	0.000386885	0.00448455	0.00055682	0.573392	0.000423478	0.000728759	0.0666011	0.0902621	0.00306815	0.259285	0.000810414
PRPF40A;935;	0.000437867	0.00244306	0.000851778	0.0585119	0.000823403	0.000581178	0.17736	0.494262	0.00832048	0.255669	0.000740054
PRPF40A;938;	0.000437867	0.00244306	0.000851778	0.0585119	0.000823403	0.000581178	0.17736	0.494262	0.00832048	0.255669	0.000740054
NUP98;1006;	0.00294041	0.000342854	0.130576	0.000475098	0.542352	0.00323648	0.0185808	0.00134305	0.285672	0.00198908	0.0124919
NUP98;662;	4.31671e-07	1.17609e-07	5.28759e-06	2.51655e-07	0.00012561	2.2159e-07	0.000292866	7.72511e-06	0.999558	7.79473e-06	1.45425e-06
NUP98;664;	2.59834e-05	4.09716e-06	0.000198694	4.69312e-06	0.0339415	6.62592e-06	0.000925971	0.000298348	0.964397	0.000137425	5.98077e-05
NUP98;666;	2.08083e-07	7.25166e-09	3.96039e-07	3.07559e-09	0.999992	1.3551e-08	6.53357e-08	7.96931e-08	6.28393e-06	4.70038e-08	4.2896e-07
NUP98;591;	0.000527974	9.98721e-05	0.000308369	7.75434e-06	7.973e-06	0.999029	1.03033e-06	3.37238e-06	1.19168e-06	9.43258e-07	1.22574e-05
NUP98;595;	0.000527974	9.98721e-05	0.000308369	7.75434e-06	7.973e-06	0.999029	1.03033e-06	3.37238e-06	1.19168e-06	9.43258e-07	1.22574e-05
NUP98;917;	0.035747	0.00268645	0.012299	0.00034346	0.0540463	0.00122668	0.000973618	0.885676	0.00429856	0.00143585	0.00126735
NUP98;822;	4.65802e-07	1.8494e-08	3.48373e-06	9.54778e-09	0.99997	5.43892e-08	2.69751e-07	2.64012e-07	2.45052e-05	9.90315e-08	5.26929e-07
REPS1;91;	0.00265727	0.00200881	0.758977	0.00992682	0.00509844	0.184336	0.0228117	0.00460581	0.00678257	0.00142513	0.00137058
REPS1;93;	0.00146273	0.000752808	0.824293	0.00202419	0.00221806	0.162139	0.00339027	0.0011865	0.00167188	0.000329076	0.000532255
REPS1;483;	0.000172483	4.73131e-05	0.000231516	5.10119e-05	0.0248801	2.67214e-05	0.00542378	0.00373302	0.954398	0.00994367	0.00109219
REPS1;485;	2.07299e-05	8.44743e-06	4.76575e-05	1.53406e-05	0.001835	5.53684e-06	0.00593944	0.000929868	0.9874	0.00367309	0.000125224
REPS1;488;	0.000242183	0.000114808	0.000233463	0.000174437	0.0107681	4.62855e-05	0.0185508	0.00500087	0.784238	0.176849	0.00378203
REPS1;504;	0.000172483	4.73131e-05	0.000231516	5.10119e-05	0.0248801	2.67214e-05	0.00542378	0.00373302	0.954398	0.00994367	0.00109219
REPS1;506;	0.000242183	0.000114808	0.000233463	0.000174437	0.0107681	4.62855e-05	0.0185508	0.00500087	0.784238	0.176849	0.00378203
REPS1;220;	0.000112025	1.6231e-05	0.000258177	1.62576e-06	2.42933e-06	0.999606	2.92751e-07	1.14446e-06	3.3854e-07	2.08793e-07	1.8363e-06
REPS1;221;	3.26011e-05	6.75426e-06	0.000274968	1.18877e-06	1.51564e-06	0.999681	2.42164e-07	7.32102e-07	2.52939e-07	1.38478e-07	9.77632e-07
REPS1;423;	6.16786e-05	4.93431e-05	0.00237579	4.14127e-05	1.11519e-05	0.997429	7.15269e-06	1.08288e-05	4.26259e-06	2.43053e-06	7.42369e-06
REPS1;430;	3.84931e-05	4.22617e-05	0.00085332	3.75566e-05	6.00592e-06	0.999002	4.53476e-06	6.93684e-06	2.49542e-06	1.70544e-06	5.05391e-06
DUT;11;	2.14872e-06	2.53782e-06	7.14459e-06	2.49224e-05	3.50301e-05	1.89869e-06	0.967697	7.0707e-05	0.0182528	0.0138782	2.73485e-05
DUT;13;	1.15658e-05	3.08161e-05	3.13203e-05	0.0013321	5.76044e-05	1.91734e-05	0.850036	0.000275333	0.00305617	0.145	0.000149303
RFC1;311;	4.8178e-05	0.00021695	0.000104258	0.0229374	0.000135771	9.27721e-05	0.416241	0.00168211	0.0033201	0.554805	0.000416213
RFC1;312;	4.8178e-05	0.00021695	0.000104258	0.0229374	0.000135771	9.27721e-05	0.416241	0.00168211	0.0033201	0.554805	0.000416213
RFC1;156;	3.61865e-07	2.63465e-07	4.64507e-06	2.19848e-06	1.10779e-05	5.63626e-07	0.990048	6.60975e-06	0.00987816	4.63253e-05	2.26821e-06
IMPDH1;245;	8.26793e-05	0.00141653	0.000323084	0.992903	3.07505e-05	0.00362699	0.000654447	0.000544684	6.57837e-05	0.000291232	6.13092e-05
EDC4;871;	0.00794225	0.00693058	0.000905371	0.000309439	0.000782794	0.000554295	0.000139763	0.981649	0.000204691	0.000385271	0.000196864
EDC4;875;	0.00794225	0.00693058	0.000905371	0.000309439	0.000782794	0.000554295	0.000139763	0.981649	0.000204691	0.000385271	0.000196864
EDC4;879;	0.00794225	0.00693058	0.000905371	0.000309439	0.000782794	0.000554295	0.000139763	0.981649	0.000204691	0.000385271	0.000196864
EDC4;887;	0.00794225	0.00693058	0.000905371	0.000309439	0.000782794	0.000554295	0.000139763	0.981649	0.000204691	0.000385271	0.000196864
EDC4;890;	0.00794225	0.00693058	0.000905371	0.000309439	0.000782794	0.000554295	0.000139763	0.981649	0.000204691	0.000385271	0.000196864
EDC4;723;	0.000522242	0.00193498	7.8295e-05	0.000190058	0.000116613	6.41246e-05	7.01134e-05	0.996444	7.3847e-05	0.00043869	6.73968e-05
EDC4;725;	0.00200751	0.00968087	0.000218848	0.00054061	0.000270885	0.00022398	0.000137191	0.985769	0.00014314	0.000826948	0.000180795
GRSF1;335;	0.99746	0.000161317	0.000776582	3.21005e-06	8.61903e-05	0.00146091	1.24206e-06	2.0975e-05	3.03209e-06	1.66402e-06	2.48908e-05
[truncated: 1,417 more rows]

## Sheet: insulin activation
Phosphorylation site	cluster 1	cluster 2	cluster 3	cluster 4	cluster 5	cluster 6	cluster 7	cluster 8	cluster 9	cluster 10	cluster 11	cluster 12	cluster 13	cluster 14	cluster 15	cluster 16	cluster 17
ARHGAP14;858;	0.000208352	0.0162128	0.919912	0.000773918	0.00342972	0.00243229	0.00176767	0.00494756	0.00173623	0.00102915	0.00166653	0.000436719	0.000910648	0.0388243	0.00389039	0.000410944	0.00141116
SRPK1;51;	0.000277079	0.000408897	0.973335	0.008247	0.000941331	0.000500915	0.000331186	0.00399312	0.000205992	0.00636519	0.000146834	0.000790263	0.000197892	0.00211684	0.00153423	0.000355795	0.000252431
KIAA1927;274;	0.991283	7.67871e-05	2.80953e-05	0.000488225	0.000905979	0.0020695	0.0010375	0.000871235	0.000846745	1.72849e-05	0.000201074	1.09251e-05	0.000195224	1.29621e-05	0.00138472	1.59012e-05	0.000555298
KIAA1741;1204;	0.00251903	0.00853	0.000111087	0.000114052	0.00120414	0.00315874	0.00644165	0.000458072	0.0662759	5.06982e-05	0.839545	9.12938e-05	0.0504855	0.000382528	0.000651746	0.000289906	0.0196905
MAPKAP1;86;	6.98868e-05	0.444644	0.0162745	0.0001015	0.000821794	0.000991139	0.00105037	0.00107401	0.00305675	0.000271017	0.0170342	0.000278765	0.0015936	0.510157	0.000751113	0.000362576	0.00146782
SRP72;139;	0.000258442	0.00441659	0.270758	0.00248509	0.000794116	0.000636665	0.000481102	0.00364391	0.000553201	0.0392355	0.00106198	0.00916063	0.000731349	0.661309	0.00114686	0.00284948	0.000477974
GEMIN5;757;	0.995329	4.34706e-05	2.91688e-05	0.0022083	0.000219735	0.000327192	0.000200982	0.000513661	0.000185459	7.68563e-05	0.000109189	4.47336e-05	0.000146753	2.09036e-05	0.000348361	4.92851e-05	0.000146923
DAB2IP;1031;	5.57877e-05	0.000434926	0.978172	0.000242964	0.00490086	0.00153133	0.000727935	0.00423784	0.000309512	4.81385e-05	7.4315e-05	1.38041e-05	5.54047e-05	0.00015853	0.00874408	1.3285e-05	0.000279625
HNRNPM;527;	0.992813	1.54542e-05	2.32246e-05	0.00605325	0.000114654	0.000108332	9.14478e-05	0.000141186	6.08564e-05	8.71019e-05	3.62614e-05	5.29568e-05	0.000123882	1.19024e-05	0.000116709	6.94282e-05	8.04235e-05
EDD;327;	0.997894	1.42427e-05	6.60434e-06	0.000108246	0.000279293	0.000357951	0.000377596	6.23648e-05	0.000238985	3.5795e-06	5.20024e-05	2.95734e-06	0.000144639	2.55498e-06	0.000161799	6.34125e-06	0.000286423
ZC3HAV1;263;	0.13065	0.0122789	0.00234315	0.0128566	0.0152965	0.0626146	0.0151331	0.59634	0.0245353	0.00178758	0.0135184	0.000749925	0.00260203	0.00240499	0.0990008	0.000569137	0.00731895
RAB13;5;	0.00144048	0.00628369	7.31322e-05	5.04902e-05	0.0066375	0.096855	0.0549027	0.00180199	0.775968	8.70261e-06	0.0214718	7.42778e-06	0.00111542	5.67262e-05	0.00670287	1.3805e-05	0.0266103
KIAA1927;85;	0.445909	0.00577893	0.00208314	0.0243018	0.00577087	0.00660538	0.00945149	0.0041941	0.0153679	0.0105867	0.0417099	0.0326502	0.232167	0.00541604	0.00370628	0.13626	0.0180417
KIAA0324;522;	0.0033686	0.00329035	0.357426	0.0534915	0.00486832	0.00211214	0.00257989	0.00367451	0.00193106	0.219716	0.00246853	0.138733	0.0111546	0.0376454	0.00296894	0.151382	0.00318913
GM551;777;	0.0335539	0.0210186	0.000433046	0.00066799	0.015457	0.0859052	0.07257	0.00776738	0.492947	0.000130796	0.172447	0.000131183	0.0154206	0.000594243	0.014703	0.000257467	0.0659962
FAM193A;293;	0.0131857	0.00145098	0.000148452	0.000201611	0.0263388	0.0882598	0.303267	0.00151554	0.2223	1.80986e-05	0.00605169	1.64783e-05	0.00610893	5.38004e-05	0.00764977	3.90937e-05	0.323394
GM551;770;	0.0973817	0.0706506	0.00273151	0.00577428	0.026327	0.106443	0.0502016	0.11805	0.193215	0.00177473	0.206785	0.00135172	0.0156269	0.00597993	0.0623976	0.00156401	0.0337461
ARHGAP14;837;	2.65129e-05	0.000342188	0.000473237	9.87066e-06	0.666569	0.175077	0.109291	0.000451249	0.00607471	1.04208e-06	8.4718e-05	6.01097e-07	5.24077e-05	6.41255e-06	0.0335063	1.06483e-06	0.00803252
RP23-133N19.2-002;3005;	0.0118513	0.064642	0.000672009	0.000665851	0.00902106	0.0562877	0.0369247	0.0199041	0.325116	0.000224738	0.411678	0.000213906	0.00949343	0.00161958	0.015075	0.000320473	0.0362897
CHD1;5;	0.128406	0.0836042	0.00510509	0.0150513	0.0166258	0.0407534	0.0284151	0.0778126	0.0944338	0.0115242	0.347247	0.011829	0.040393	0.0299446	0.0288047	0.0117687	0.0282818
KIAA0324;1062;	0.00378365	0.0165603	0.000180483	0.000179419	0.0022117	0.00604702	0.0103861	0.00078087	0.099619	7.59821e-05	0.788606	0.000123484	0.0460246	0.000625845	0.0012332	0.000368153	0.0231944
AKT2;309;	0.000205147	0.638883	0.181244	0.000342232	0.00547249	0.00589067	0.00481149	0.0082271	0.0104214	0.000524772	0.0165012	0.000339357	0.00196753	0.11409	0.00637081	0.000375253	0.0043329
IGF1R;1167;	7.3112e-05	0.00568939	0.975118	0.00026411	0.00140211	0.00121839	0.000779153	0.00350617	0.000712231	0.000251054	0.000551431	0.000100203	0.000262372	0.00721844	0.00212593	8.73038e-05	0.000640699
ZFP395;247;	0.0123981	0.0380419	0.000456614	0.000642638	0.00418879	0.0146585	0.0158976	0.00451741	0.119327	0.000289985	0.729859	0.000395354	0.0273441	0.00204935	0.00411792	0.000787042	0.0250291
PTPN12;448;	0.999401	2.4215e-06	2.94617e-06	0.000243302	6.44241e-05	7.32169e-05	3.7372e-05	4.05823e-05	1.6541e-05	1.9086e-06	4.09298e-06	9.45712e-07	9.19659e-06	7.38597e-07	8.03797e-05	1.34087e-06	1.95055e-05
FAM193A;302;	0.00114379	0.000285016	3.83271e-05	2.85953e-05	0.0364614	0.0506416	0.59525	0.000219464	0.132552	2.47281e-06	0.000860992	2.1496e-06	0.00108117	7.9375e-06	0.00275162	5.49931e-06	0.178669
ITGB1BP1;38;	0.00150108	0.00288935	0.81648	0.0216166	0.0031266	0.00177204	0.00152079	0.00632909	0.00127231	0.0762787	0.00149399	0.0200516	0.00245103	0.0286436	0.00333232	0.00971356	0.00152699
MYH10;1972;	0.606725	0.011387	0.00169372	0.016933	0.00820677	0.0130349	0.0149528	0.00747063	0.0299265	0.00570642	0.0793856	0.0106542	0.131557	0.0058673	0.00653817	0.0270645	0.0228973
ITGB1BP1;11;	0.000920774	0.00116808	0.692359	0.00735447	0.015149	0.00840138	0.00304024	0.19042	0.0012173	0.000675542	0.000323553	0.000134149	0.000263986	0.000715597	0.076485	9.42743e-05	0.00127778
IRS1;891;	0.000261631	0.334625	0.518566	0.000351186	0.0211552	0.0169352	0.0163392	0.00770056	0.0242713	0.000253522	0.0135424	0.000168693	0.00302609	0.0141073	0.0146182	0.000248047	0.01383
TTC15;232;	0.000132464	0.000629011	0.000862705	3.74069e-05	0.368359	0.0238364	0.357416	0.000194004	0.0178715	4.29322e-06	0.000430275	3.44446e-06	0.00144228	2.24695e-05	0.0034749	9.56644e-06	0.225274
ABP1;299;	0.997708	6.78199e-06	1.10462e-05	0.00083743	0.000336153	0.000300107	0.000162344	0.000123027	5.13107e-05	4.73857e-06	1.00608e-05	2.25789e-06	2.83454e-05	1.96907e-06	0.000335604	3.41933e-06	7.70916e-05
KIAA0324;524;	0.00284211	0.00302419	0.445204	0.0534112	0.00409746	0.00192051	0.00208137	0.00404803	0.00160841	0.243266	0.00205033	0.107597	0.00705388	0.0373103	0.00294478	0.0791137	0.00242657
LRRC41;327;	0.00440537	0.00148234	0.000140509	0.00021164	0.00165787	0.00155216	0.00567891	0.000172617	0.014589	6.54888e-05	0.0276268	0.000147899	0.918586	0.000212218	0.000394977	0.00102966	0.0220466
BET1;50;	0.999827	3.40614e-07	6.20147e-07	0.000119405	1.18806e-05	9.10206e-06	6.08492e-06	5.47482e-06	2.28415e-06	4.79209e-07	5.82651e-07	2.31831e-07	1.94994e-06	1.31205e-07	1.08959e-05	3.48905e-07	3.40648e-06
ANKLE2;820;	0.000645304	0.000163897	2.76791e-05	1.74449e-05	0.0317451	0.0853409	0.67941	0.000188089	0.0609783	1.35218e-06	0.000367111	1.09156e-06	0.000419214	4.46581e-06	0.00285581	2.56986e-06	0.137832
BCDIN3;268;	0.0250182	0.0277519	0.000496525	0.000702214	0.00980052	0.0408442	0.048095	0.00589922	0.339622	0.000193889	0.392553	0.000229426	0.0314058	0.00103804	0.00816263	0.000488988	0.067699
WDR44;264;	0.989645	2.19871e-05	4.17338e-05	0.00855106	0.000201855	0.000166503	0.000153304	0.000198121	0.000101609	0.000121643	5.63959e-05	7.9165e-05	0.000210495	1.57255e-05	0.000184838	0.000110706	0.000139556
KIAA1102;215;	0.0195297	1.09904e-05	0.000143053	0.978884	0.000248797	0.00011204	8.38691e-05	0.00024844	3.39233e-05	0.000210172	1.36522e-05	5.41197e-05	5.3473e-05	1.18633e-05	0.000253701	5.21715e-05	5.59602e-05
SDPR;247;	0.245574	0.00125132	0.00209972	0.247296	0.00206817	0.00186501	0.0018853	0.0037127	0.0019395	0.124079	0.00322783	0.186627	0.0123172	0.0037661	0.00196967	0.157975	0.0023473
APRF;714;	0.000118485	0.00122085	0.00263648	5.12553e-05	0.595229	0.0414967	0.249834	0.000572378	0.0199774	6.64565e-06	0.000507711	4.5874e-06	0.000731906	3.87285e-05	0.0111531	1.02514e-05	0.0764099
CLK3;281;	0.000826858	0.00177907	0.640949	0.0241555	0.00164893	0.000917504	0.00076815	0.00432621	0.000600522	0.238584	0.000729446	0.0271555	0.00125461	0.0450801	0.00187731	0.00861125	0.000736393
HCFC1;2030;	0.110437	0.0806124	0.00336792	0.00865215	0.0167278	0.0619047	0.0353019	0.116543	0.132429	0.00388522	0.314837	0.00339937	0.0241742	0.0128078	0.0376018	0.003488	0.0338309
PLS3;293;	0.99206	3.14512e-05	3.83409e-05	0.000702957	0.00163771	0.00110491	0.00144968	0.000201041	0.000502331	1.32482e-05	8.61236e-05	9.77096e-06	0.000422399	7.13034e-06	0.000651528	2.15303e-05	0.00105984
F11R;285;	0.0368404	0.000209571	0.000783659	0.914787	0.000613738	0.000524044	0.000374133	0.00226134	0.00027035	0.0318213	0.000256019	0.00612239	0.000628713	0.000624296	0.00088375	0.00267754	0.000322016
GRAMD3;154;	0.99999	3.69273e-08	4.78214e-08	4.23716e-06	1.09615e-06	9.00685e-07	7.50443e-07	3.99004e-07	3.28012e-07	3.80952e-08	8.47543e-08	2.30193e-08	3.03555e-07	1.22604e-08	8.1597e-07	3.98047e-08	4.80852e-07
ARF1GAP;342;	0.00138935	0.00326395	0.143149	0.00150726	0.56403	0.0422473	0.111778	0.0035604	0.0144937	0.00015211	0.00152469	9.43843e-05	0.00617049	0.000488209	0.031744	0.000215558	0.0741918
F11R;288;	0.013287	4.5812e-05	0.000257213	0.980002	0.000229678	0.000173016	0.000104789	0.000709997	6.62236e-05	0.00356964	4.79322e-05	0.000563464	0.000112215	9.88218e-05	0.000360049	0.000297209	7.4805e-05
CCD1;250;	0.649866	0.00189199	0.000311531	0.00155948	0.032415	0.103091	0.0720424	0.00755471	0.0606086	8.92638e-05	0.00595065	6.69603e-05	0.00478117	0.000140398	0.0266311	0.000125316	0.0328741
GRAMD3;153;	0.99995	2.10177e-07	2.42475e-07	2.08556e-05	5.28864e-06	5.35765e-06	3.47047e-06	3.08923e-06	1.64786e-06	1.99747e-07	4.32588e-07	1.08048e-07	1.08114e-06	6.76681e-08	5.50259e-06	1.6169e-07	1.9631e-06
PAR3;1077;	5.11658e-05	0.813524	0.0108152	7.00629e-05	0.000744754	0.00114513	0.000938833	0.0018821	0.00283883	0.000146966	0.0105562	0.000112793	0.000604697	0.154431	0.000984958	0.000118551	0.00103497
KIAA1102;217;	0.0601972	1.77241e-05	0.000171529	0.937368	0.00040428	0.000189251	0.000137422	0.00038475	5.75218e-05	0.000285139	2.29847e-05	7.78991e-05	8.58671e-05	1.76427e-05	0.000416712	7.78149e-05	8.78657e-05
KIAA1927;271;	0.997699	1.60621e-05	1.09313e-05	0.00033759	0.000320243	0.000372912	0.000286945	0.00016324	0.000173998	7.81082e-06	4.24303e-05	5.01193e-06	8.15612e-05	3.81038e-06	0.00030063	8.12065e-06	0.000169738
RBM15B;606;	0.10145	0.0514202	0.0030206	0.00810776	0.0226248	0.112917	0.0376138	0.350345	0.0998462	0.00201002	0.0815737	0.00119877	0.00828161	0.00580819	0.0895162	0.00111355	0.0231515
ARFGAP3;242;	0.0370826	9.08406e-05	0.000495097	0.948153	0.000503298	0.000468028	0.000232662	0.00553092	0.0001566	0.0045979	9.86616e-05	0.000584297	0.000137252	0.000145517	0.00133895	0.000238021	0.000146322
NFAT3;213;	2.97247e-05	0.00134328	0.98963	0.00012972	0.000956193	0.000629612	0.000299777	0.0030957	0.000241	8.70669e-05	0.000124675	2.50221e-05	5.2609e-05	0.00103942	0.00213857	1.95236e-05	0.000158242
D1BWG0491E;1769;	0.00252207	0.167167	0.0988674	0.00269111	0.0202184	0.0120133	0.0257853	0.00528438	0.0497771	0.00482891	0.157362	0.00865538	0.204626	0.151648	0.00727725	0.0308512	0.0504255
LUC7L2;17;	0.599217	0.00192321	0.000619365	0.00467033	0.00878774	0.00868515	0.0225511	0.00165437	0.0216743	0.000523414	0.0140816	0.000846097	0.252183	0.000520865	0.00295214	0.00371679	0.0553934
FKHR2;252;	7.85287e-07	0.994176	1.41598e-05	4.35426e-07	9.1834e-06	2.26254e-05	2.1344e-05	1.21249e-05	0.000209545	5.99729e-07	0.00530544	6.67267e-07	1.67491e-05	0.000169196	9.96214e-06	9.98695e-07	3.05969e-05
CIC;758;	0.000328726	0.000834064	2.21405e-05	1.23749e-05	0.0105921	0.22479	0.21139	0.000386983	0.510816	1.44674e-06	0.00143386	1.13896e-06	0.00027227	8.14605e-06	0.00432966	2.31367e-06	0.0347793
EIF3B;143;	0.0647307	0.0726055	0.00250946	0.00617566	0.0081883	0.0229022	0.0186802	0.0293016	0.0776878	0.00507413	0.571416	0.00701512	0.0466134	0.021174	0.0120901	0.00861761	0.0252183
TTC7B;629;	0.028927	0.192949	0.00370475	0.00532549	0.0106133	0.0365945	0.0204904	0.072775	0.0861897	0.00430716	0.431904	0.00394215	0.0195803	0.0355489	0.0230082	0.00377878	0.0203607
KIAA0324;1058;	0.00390034	0.0168199	0.000235031	0.000197319	0.00459315	0.00896787	0.0252009	0.000586575	0.186043	6.63389e-05	0.474448	0.000109048	0.202475	0.000545367	0.00145498	0.000430121	0.0739267
GPRIN3;577;	2.13237e-05	0.00913633	0.00652503	5.87098e-05	0.000127153	0.000150626	0.000113	0.000639566	0.000228616	0.000348029	0.000793128	0.000199217	0.000127263	0.9811	0.000198895	0.00011768	0.000115094
GEG-154;631;	0.116048	0.0152571	0.00121321	0.00234901	0.0256469	0.050092	0.0783878	0.00702463	0.299955	0.000473855	0.187868	0.000600925	0.0875364	0.001167	0.0141016	0.00151483	0.110764
ABH5;372;	0.0882118	8.35774e-05	0.000416088	0.900489	0.000795743	0.00073738	0.000357333	0.0048204	0.000182084	0.00110987	8.50372e-05	0.000214477	0.000157355	9.07909e-05	0.00189607	0.000136277	0.000216645
KIAA0676;433;	0.0334435	0.000956303	0.000172727	0.000285057	0.085053	0.365831	0.277021	0.0031023	0.13259	1.70354e-05	0.00251682	1.25519e-05	0.00174325	3.72103e-05	0.0357802	2.49439e-05	0.061413
EML3;177;	0.999986	4.16007e-08	6.53996e-08	8.19117e-06	1.31066e-06	1.00247e-06	8.46939e-07	4.40719e-07	3.32019e-07	5.0956e-08	8.7693e-08	3.00308e-08	3.80592e-07	1.52469e-08	9.19356e-07	5.2997e-08	5.71354e-07
MAP4;973;	0.0315544	0.00221227	0.00236377	0.0724965	0.00131302	0.00157446	0.00117754	0.00911608	0.00167017	0.531299	0.00402987	0.280364	0.00362307	0.012974	0.00217171	0.0408431	0.0012176
D1BWG0491E;1774;	0.00338994	0.00444837	0.835854	0.0173278	0.0432219	0.00932072	0.0157007	0.00571448	0.00546071	0.00381397	0.00233006	0.00209246	0.0138808	0.00546307	0.0116907	0.00442456	0.0158661
NCAM;774;	0.000432267	0.0115572	0.868694	0.000735433	0.0333367	0.0131402	0.0156251	0.00837564	0.0102904	0.000289469	0.00297012	0.000162763	0.00217425	0.00219195	0.0179577	0.000233032	0.011834
IQCE;374;	0.937408	0.000590107	0.000281545	0.00504528	0.00232076	0.00226785	0.00366472	0.00081083	0.00376996	0.000520345	0.00335551	0.000815729	0.029001	0.000266931	0.00113193	0.00294537	0.00580397
SOS1;1196;	4.40046e-05	0.000162499	4.99121e-06	1.93202e-06	0.00350072	0.091064	0.32197	5.32209e-05	0.528018	2.23876e-07	0.000294343	1.8462e-07	7.29506e-05	1.3565e-06	0.000753253	4.02608e-07	0.0540572
CEP63;488;	0.000377074	0.000404049	0.00528747	0.000214701	0.846418	0.0212044	0.0782838	0.000596333	0.00434354	1.40309e-05	0.000231682	8.7887e-06	0.000970246	3.85341e-05	0.0111881	2.07034e-05	0.0303988
LRRC68;582;	9.35313e-05	0.00113231	0.00246883	0.000383365	0.000112325	9.1489e-05	0.000105706	0.000187766	0.000168415	0.0199402	0.000848045	0.0986648	0.00103671	0.821979	9.37869e-05	0.0525358	0.000157784
PDE3B;574;	1.40718e-07	0.999656	5.2194e-06	8.55039e-08	4.25922e-06	9.82383e-06	9.59911e-06	2.76684e-06	6.52062e-05	7.89296e-08	0.000212219	7.36949e-08	3.11597e-06	1.60994e-05	3.69761e-06	1.21489e-07	1.17058e-05
F11R;286;	0.0149797	6.36732e-05	0.000416	0.976245	0.000360809	0.000262801	0.000166508	0.0011952	9.65494e-05	0.0041742	6.44709e-05	0.000650325	0.000157061	0.000134906	0.000557999	0.000356614	0.000118394
LARP4;400;	0.999955	2.77935e-07	2.20405e-07	9.78234e-06	5.99616e-06	6.02784e-06	5.54124e-06	1.99995e-06	2.97622e-06	1.74489e-07	7.93808e-07	1.24366e-07	2.58961e-06	7.56049e-08	4.1559e-06	2.36348e-07	3.91625e-06
CASP3;26;	0.996493	1.41403e-05	2.16512e-05	0.00233683	0.000144304	0.000118893	0.000119152	9.1135e-05	7.66507e-05	4.40241e-05	3.95815e-05	3.33968e-05	0.000178666	8.39682e-06	0.000108859	5.88978e-05	0.000112387
MACF1;57;	0.00514974	0.00930731	0.000932897	0.00138042	0.00122296	0.00140733	0.00261587	0.000776219	0.00743542	0.00315267	0.126622	0.0243382	0.479276	0.016204	0.000660749	0.3123	0.00721858
KIAA1361;445;	0.000142176	0.000187517	0.00780665	0.00340453	0.000115805	7.32259e-05	7.00766e-05	0.000303545	6.85323e-05	0.847452	0.000127905	0.119016	0.000252352	0.00952516	0.000120571	0.011254	8.03454e-05
ABP1;277;	0.993204	9.96064e-06	3.14179e-05	0.00412401	0.000708711	0.000442841	0.000283393	0.000253473	7.44964e-05	1.16749e-05	1.431e-05	5.07663e-06	5.00879e-05	3.53821e-06	0.000634162	7.42052e-06	0.000141916
HCFC1;2029;	0.134601	0.0737603	0.00426116	0.0130975	0.0200419	0.0791684	0.0323411	0.265643	0.0972289	0.00488516	0.152928	0.00324823	0.0142565	0.0132651	0.0644356	0.00277876	0.0240586
PSMF1;189;	0.00014615	0.000272508	0.000145615	2.2522e-05	0.0163556	0.00313987	0.0857082	5.03215e-05	0.0132717	2.99986e-06	0.000574119	3.3144e-06	0.0101088	1.34434e-05	0.000427269	1.32014e-05	0.869744
SIN3A;431;	7.39856e-05	0.000639655	0.0011155	2.94159e-05	0.638874	0.030312	0.238116	0.00019998	0.00885959	3.21054e-06	0.000234517	2.28736e-06	0.000585759	2.02565e-05	0.00473405	5.72405e-06	0.0761942
CIC;753;	0.000334095	0.00145703	2.71228e-05	1.44421e-05	0.00606078	0.0450042	0.128127	0.00029763	0.750772	2.1998e-06	0.00412396	1.96031e-06	0.000712066	1.42892e-05	0.00191543	4.40339e-06	0.0611315
DCAMKL1;337;	8.61799e-05	0.000198562	0.989349	0.00124662	0.000972243	0.000421603	0.00023673	0.00428932	0.000120903	0.00037409	5.31755e-05	6.1966e-05	5.32651e-05	0.000344437	0.00202372	3.85381e-05	0.000129319
KIAA1458;344;	0.0290689	0.010361	0.000604103	0.00151928	0.00418582	0.00579163	0.0124919	0.00132344	0.0371453	0.000693583	0.18012	0.00170275	0.668401	0.00241567	0.00182546	0.00904198	0.0333081
KIAA0195;519;	0.060199	0.0177844	0.000711086	0.00130304	0.0198193	0.0541286	0.0813831	0.00634796	0.381865	0.000265388	0.201695	0.000312061	0.0520535	0.00090757	0.012191	0.000735373	0.108299
ATF7IP;514;	0.917134	0.000630594	0.000562536	0.00738759	0.0159862	0.0115235	0.0122026	0.0035799	0.00747257	0.000260537	0.00172136	0.000185912	0.00407266	0.000143207	0.00919417	0.000352588	0.00758959
CTAGE5;515;	0.00104487	0.00888689	0.361717	0.00923952	0.00289796	0.00180291	0.00171455	0.00712063	0.00195676	0.150635	0.00362688	0.0529726	0.00350274	0.367585	0.00307346	0.0204575	0.00176451
CDW12;835;	0.000250721	0.000423337	0.00145631	0.000100256	0.110535	0.115711	0.0143678	0.0139335	0.00376864	7.57867e-06	0.000164033	3.3409e-06	7.37817e-05	2.14308e-05	0.737135	4.26683e-06	0.00204333
KIAA0975;545;	0.00101202	0.00100015	0.796549	0.0102187	0.0112899	0.00617437	0.00227636	0.116418	0.00100014	0.000932352	0.000303616	0.000172157	0.000261184	0.000754253	0.0505058	0.000114367	0.00101721
KIAA0561;771;	0.000416965	0.000727035	0.0497456	0.00945823	0.000446515	0.000277597	0.000264179	0.00109627	0.000247689	0.741386	0.000433918	0.134937	0.000861684	0.0364207	0.000457443	0.0225193	0.000304037
FOXO1;326;	4.70042e-07	0.000218996	1.88745e-05	8.02309e-07	1.36457e-06	1.70567e-06	1.78048e-06	3.22568e-06	5.05856e-06	7.57702e-06	6.46194e-05	1.35663e-05	8.68245e-06	0.999637	1.41747e-06	1.21348e-05	2.7465e-06
IGF1R;1163;	5.92857e-05	0.830584	0.00792835	6.82716e-05	0.000856188	0.00106176	0.00129071	0.000653647	0.00401468	0.000129061	0.0227753	0.000145832	0.0021483	0.125363	0.000622801	0.000246324	0.00205276
IRS1;133;	0.00023707	0.271819	0.186656	0.000520657	0.00377578	0.00384332	0.00324215	0.00548887	0.00543518	0.00101105	0.0105318	0.000661291	0.00247063	0.496277	0.00397737	0.000725042	0.00332712
FISH;1029;	0.14234	0.000541839	0.000423083	0.00148821	0.292015	0.152449	0.272578	0.00219795	0.0179968	3.5374e-05	0.000827103	2.38786e-05	0.00373026	5.05986e-05	0.0294036	5.62156e-05	0.0838428
KIAA1002;381;	0.998289	1.18806e-05	8.601e-06	0.000366862	0.000149973	0.000269272	0.000130632	0.000259144	8.71e-05	7.2643e-06	2.55815e-05	3.86477e-06	3.26138e-05	3.2356e-06	0.000275154	4.77699e-06	7.48787e-05
PDLIM2;143;	4.913e-05	0.00824024	0.00262863	0.000129559	0.000154261	0.000214083	0.000144072	0.00096094	0.000280321	0.000789257	0.0010488	0.000433545	0.000194283	0.984095	0.000266736	0.000226445	0.000145159
TNS1;1558;	0.000121311	0.001309	0.972484	0.000895885	0.00197901	0.00113745	0.000554738	0.0125441	0.000402317	0.000591255	0.000213592	0.000117182	0.000115878	0.00198986	0.00518782	7.21136e-05	0.000284285
CHD8;1999;	5.28473e-05	6.65294e-05	0.00114564	0.000959894	2.87497e-05	2.21342e-05	1.84146e-05	0.000106055	2.12441e-05	0.895427	4.89739e-05	0.0941856	6.71568e-05	0.00431434	3.61099e-05	0.00347858	2.04698e-05
CLP1;52;	0.000355733	0.0184702	0.00762051	0.000159255	0.0786535	0.0290787	0.183038	0.000746066	0.0761803	3.69897e-05	0.00781618	3.62385e-05	0.0229338	0.000484177	0.00524506	0.000113525	0.569032
KIAA1881;20;	0.590576	6.14119e-05	0.000271491	0.402843	0.00066573	0.000411855	0.000354184	0.00066357	0.000200455	0.00121292	0.000113836	0.000537595	0.000497854	6.79657e-05	0.000609612	0.000617528	0.000294958
LAP1B;328;	0.0029583	0.00650686	0.53065	0.0092772	0.184756	0.0540693	0.041387	0.0287776	0.00896033	0.000738625	0.00170767	0.000288853	0.00341712	0.00205804	0.102084	0.000405235	0.021957
FAM171A1;514;	0.00422164	0.0015941	0.00105412	0.00851159	0.000389114	0.00049878	0.000413685	0.00213396	0.000719176	0.261415	0.00311217	0.631577	0.00232635	0.0232432	0.000562353	0.0577067	0.000520889
CLOCK;847;	3.6011e-06	0.960552	3.70698e-05	1.18484e-06	0.000189358	0.000509924	0.0010802	2.64473e-05	0.0183827	6.44557e-07	0.0164696	6.9764e-07	0.000202279	4.26817e-05	7.48876e-05	1.61707e-06	0.00242513
PROTOR1;373;	0.113533	0.0312849	0.00148459	0.00475865	0.00981275	0.0203071	0.0284069	0.00669018	0.0839326	0.00196584	0.342247	0.00358193	0.271322	0.00695388	0.00677654	0.0104857	0.0564559
MCG_17339;88;	0.060375	0.0304101	0.00304799	0.0100582	0.00520548	0.00806081	0.0101949	0.00836611	0.0306281	0.0190425	0.330071	0.0737259	0.185764	0.0392048	0.00460713	0.162168	0.0190693
AKAP10;278;	4.59087e-07	0.99914	1.41775e-05	2.54885e-07	2.17884e-05	7.17699e-05	4.8247e-05	1.77505e-05	0.000312943	1.6999e-07	0.000282612	1.31678e-07	5.0636e-06	1.79878e-05	2.6285e-05	1.94617e-07	3.9957e-05
ARHGEF2;114;	0.00123372	0.0582333	0.187337	0.00284258	0.00677052	0.00442906	0.00804109	0.00344074	0.0104162	0.00817784	0.0300304	0.0147553	0.0749565	0.525783	0.00319297	0.0424659	0.0178937
CASKIN2;874;	0.00449902	0.00174533	0.000153144	0.000226979	0.00149616	0.00188075	0.00588322	0.000188145	0.0114922	6.1091e-05	0.0205623	0.000128294	0.920707	0.000254737	0.000407607	0.00080237	0.0295114
KIAA0599;433;	0.999342	2.50661e-06	3.75048e-06	0.000353191	5.79878e-05	5.35176e-05	3.90445e-05	2.44057e-05	1.69915e-05	2.7179e-06	4.95907e-06	1.59877e-06	1.86918e-05	9.19792e-07	4.7754e-05	2.6844e-06	2.76648e-05
BBX;159;	6.73262e-06	0.986507	0.0002879	4.4955e-06	0.000130072	0.000308471	0.000260285	0.000244965	0.00191601	5.40386e-06	0.00887684	4.77176e-06	8.62577e-05	0.000884128	0.00017337	6.12795e-06	0.000297385
CARHSP1;31;	0.956925	0.000497452	0.000326337	0.00937342	0.00201004	0.0020608	0.00246889	0.000836997	0.00214054	0.000620947	0.00179449	0.000790945	0.0130186	0.000275566	0.00116717	0.00232264	0.00337044
GAS2L1;438;	0.0746481	0.00988189	0.000788719	0.00203008	0.0129275	0.0190155	0.0424158	0.0018287	0.0781348	0.000377756	0.0801128	0.000613244	0.558314	0.00119908	0.00427117	0.00266694	0.110774
LUC7L2;18;	0.914644	0.000511595	0.00024817	0.00409331	0.00260866	0.00240539	0.00472141	0.000613085	0.0039432	0.000322973	0.00281786	0.000507572	0.0500147	0.00020117	0.00101673	0.00218495	0.00914486
IPS1;390;	0.000654959	0.00224823	0.896772	0.00792277	0.00244867	0.00102453	0.00115699	0.00193003	0.000890708	0.0272282	0.00104854	0.0122811	0.00277122	0.0270254	0.00160132	0.0117319	0.00126348
SOS1;1179;	1.55222e-05	0.00453925	8.03818e-05	3.17202e-06	0.0131545	0.05797	0.148458	0.000130066	0.728933	6.72704e-07	0.00119956	5.40757e-07	0.000141942	9.29059e-06	0.00200939	1.13509e-06	0.0433532
KIAA0701;883;	0.0263899	0.0117367	0.00179004	0.00440792	0.011485	0.0540924	0.0111343	0.740395	0.0204175	0.000747252	0.00953435	0.000310098	0.00129302	0.00152983	0.0996194	0.000238276	0.00487883
IGF1R;1168;	0.00011448	0.704409	0.0232333	0.000148856	0.0015105	0.00210697	0.00225326	0.00198834	0.00599076	0.000282356	0.0245764	0.000274562	0.00261968	0.225236	0.0013985	0.000374516	0.00348249
CNBP;47;	0.193327	0.00488362	0.00397886	0.166081	0.00352147	0.00465612	0.00333122	0.0209291	0.0048807	0.285249	0.0110325	0.204638	0.0100344	0.0155734	0.00585188	0.0585862	0.0034464
AMOTL1;916;	0.00451467	0.00151364	0.617065	0.134326	0.0130239	0.00709758	0.00309763	0.156371	0.00153681	0.00946909	0.00063363	0.00115471	0.000680103	0.00221586	0.045109	0.000588805	0.00160333
KIAA1151;510;	0.940934	0.000516964	0.000107088	0.000933627	0.00575823	0.00995081	0.0114427	0.000968545	0.00975544	5.0553e-05	0.00212665	4.68467e-05	0.00478288	6.25973e-05	0.00289799	0.000112669	0.00955252
FAM110C;311;	0.986583	0.000201375	6.95283e-05	0.0016573	0.000902153	0.00142796	0.00150244	0.000667405	0.00136167	9.85677e-05	0.000764022	9.31359e-05	0.00200199	6.36675e-05	0.00074252	0.000183032	0.00167974
CEP63;492;	0.000622514	0.000904721	0.00556005	0.000251588	0.698654	0.0365149	0.153767	0.000928733	0.0135497	2.18137e-05	0.000647621	1.51337e-05	0.00213288	6.73828e-05	0.0149537	3.66471e-05	0.0713713
DHM2;1215;	1.04627e-05	0.00640186	5.53825e-06	1.37473e-06	3.91463e-05	0.000133178	0.000261849	1.3839e-05	0.00633366	8.35679e-07	0.985122	1.29174e-06	0.000705365	2.66313e-05	2.14779e-05	3.55082e-06	0.000917879
RP24-258K7.2-001;430;	4.45256e-08	0.999598	5.68227e-07	2.02017e-08	8.18831e-07	2.32009e-06	2.25597e-06	7.31325e-07	3.00668e-05	2.00759e-08	0.000357381	2.0586e-08	9.02878e-07	3.22736e-06	8.10204e-07	3.34228e-08	2.85104e-06
IRS1;265;	6.17803e-06	0.990339	0.000728286	5.34247e-06	0.000191264	0.000282727	0.000335462	0.000108668	0.00135561	6.12146e-06	0.00400213	5.86036e-06	0.000182002	0.00184344	0.000137525	9.89427e-06	0.000460183
PTPK;868;	1.1407e-05	0.00022332	0.000572606	5.46102e-05	1.52893e-05	1.47747e-05	1.42673e-05	5.41796e-05	2.40809e-05	0.00413721	0.000118395	0.00660158	7.13576e-05	0.986831	1.76578e-05	0.00121891	1.95236e-05
IRS1;136;	0.00179148	0.152666	0.349052	0.00168087	0.0686295	0.0658322	0.0691266	0.0217019	0.0813311	0.000773828	0.0360679	0.000572559	0.0155296	0.0126981	0.0433542	0.000930148	0.0782615
PTPK;872;	1.04782e-05	0.000278106	0.000845016	4.85394e-05	1.85609e-05	1.63572e-05	1.61527e-05	4.89621e-05	2.71719e-05	0.00239518	0.000127057	0.00353132	7.9239e-05	0.991433	1.95139e-05	0.001084	2.12791e-05
GSK3B;9;	8.36393e-05	0.543245	0.014926	0.000114453	0.000811757	0.00124722	0.00109873	0.00186791	0.00344285	0.000290867	0.0197706	0.000270355	0.00126356	0.408802	0.000982711	0.000291462	0.00149076
ARID1A;699;	0.315863	0.00491789	0.00140969	0.00985119	0.0182372	0.0854527	0.0199424	0.388032	0.0230571	0.00068364	0.0069042	0.000311181	0.00208202	0.000760035	0.11313	0.000285302	0.00907989
MCC;355;	0.0181068	0.0717286	0.00317117	0.00427571	0.00461885	0.00981314	0.0105166	0.0136349	0.0419994	0.00740369	0.637069	0.0158347	0.0655658	0.0507021	0.00547682	0.0205767	0.0195061
FAM13C;406;	0.000722346	0.00108628	0.9107	0.0234842	0.00199285	0.00100999	0.000765459	0.00612719	0.00051137	0.0348347	0.000428972	0.00428357	0.000665494	0.00828631	0.00264293	0.00182365	0.00063515
ERK3;441;	0.000459964	0.471688	0.014642	0.000264865	0.0399512	0.0341346	0.0753939	0.00514311	0.192742	0.000146254	0.0642999	0.000126898	0.00975102	0.00461894	0.0137118	0.000256285	0.0726695
FRAP;1262;	8.00852e-05	6.49414e-05	4.43314e-05	0.000116802	1.48981e-05	1.3987e-05	1.88901e-05	2.24635e-05	3.35113e-05	0.0027146	0.000214481	0.248783	0.000564457	0.00116161	1.14572e-05	0.746106	3.46498e-05
HSPA12B;280;	0.000381151	0.128056	0.112947	0.000317919	0.118447	0.183633	0.0751914	0.0560432	0.0733803	9.7676e-05	0.00745736	5.12235e-05	0.00121307	0.00165302	0.214373	6.59193e-05	0.0266914
PJA1;204;	6.07072e-06	5.28501e-05	1.55181e-05	1.12716e-06	0.133941	0.729306	0.125333	4.9318e-05	0.002966	1.03677e-07	1.66168e-05	6.431e-08	8.87872e-06	6.43558e-07	0.00547719	1.21136e-07	0.00282544
FAM13C;405;	0.000649378	0.00104904	0.934044	0.0159666	0.00184603	0.00107255	0.000769864	0.00936895	0.000516982	0.0199631	0.000412969	0.00263359	0.000535238	0.00649809	0.00295158	0.00108213	0.000640277
SBF1;1266;	2.29339e-06	0.0011843	8.21198e-05	4.06292e-06	6.94691e-06	9.27577e-06	8.22355e-06	2.26271e-05	2.33619e-05	3.393e-05	0.000229868	4.10597e-05	2.39397e-05	0.998279	8.69968e-06	2.92386e-05	1.05709e-05
ENO1;353;	1.83704e-05	2.83083e-06	1.42431e-05	0.000404929	2.03221e-06	1.7387e-06	1.38607e-06	8.81319e-06	1.55664e-06	0.966623	3.32e-06	0.0324004	5.49295e-06	5.48428e-05	2.75305e-06	0.000452554	1.46916e-06
EPPK1;1537;	0.0489253	0.000170682	0.000927705	0.906679	0.000805612	0.0005021	0.00040826	0.00150669	0.000295538	0.0265325	0.000253344	0.00671339	0.000749312	0.000399639	0.000894019	0.00390381	0.000333309
TNS1;1742;	0.0530239	0.0874932	0.0201428	0.0370815	0.0194283	0.036629	0.0202419	0.300835	0.041506	0.056499	0.0907737	0.0277023	0.0167094	0.112095	0.0500441	0.0139671	0.0158274
CCD1;212;	0.0238376	0.000840771	0.000129996	0.000231382	0.0241255	0.0264636	0.207583	0.000420867	0.0935866	1.84342e-05	0.00471713	2.0638e-05	0.0394368	4.63279e-05	0.00261101	7.26056e-05	0.575858
ILF3;70;	0.00195304	0.00156343	0.699362	0.0691902	0.00308417	0.00160649	0.00127008	0.00973176	0.000912342	0.167194	0.000848314	0.0182152	0.00142946	0.0123066	0.00397175	0.00624946	0.00111193
PHF2;701;	0.0294629	0.00105842	0.000320447	0.000679152	0.0112089	0.00788769	0.0487063	0.000426008	0.0267456	6.79054e-05	0.00648595	9.96863e-05	0.569268	0.00013766	0.00151974	0.000514828	0.295411
MKIAA0138;560;	9.31124e-05	0.000664856	0.00163888	0.000560059	7.18314e-05	7.00133e-05	6.04861e-05	0.000310996	9.84205e-05	0.165431	0.000433262	0.192139	0.00028101	0.627518	9.28519e-05	0.0104626	7.34787e-05
KIAA0440;1116;	0.116392	0.0402011	0.00368574	0.00835069	0.0266576	0.0524235	0.0763117	0.0292938	0.161232	0.00289557	0.210147	0.00343186	0.116156	0.00809786	0.0220857	0.00659188	0.116047
RHBDF2;83;	0.787108	0.00127076	0.00128538	0.0136144	0.0580422	0.0258238	0.037601	0.00277865	0.0117581	0.000367023	0.00238543	0.000284008	0.0185056	0.000298595	0.0129058	0.000806228	0.0251653
ANKRD57;205;	6.48205e-05	0.000977741	0.00417106	0.00033949	8.88281e-05	8.15912e-05	7.55179e-05	0.000353688	0.000127003	0.032737	0.000548887	0.0352506	0.000302121	0.919638	0.000109014	0.00504006	9.50471e-05
GAPEX5;902;	0.972505	8.70325e-06	2.32727e-05	0.0266483	0.000130843	9.09859e-05	7.2365e-05	0.000108311	3.43705e-05	5.6969e-05	1.50316e-05	2.56827e-05	6.41194e-05	6.65196e-06	0.000121227	3.41258e-05	5.36352e-05
EI24;65;	4.74844e-05	0.948187	0.000390922	2.97899e-05	0.000249259	0.000774185	0.000448023	0.00158812	0.0028774	4.9202e-05	0.0324262	4.12968e-05	0.000255495	0.0116138	0.00053142	3.92337e-05	0.000450759
PDE3B;512;	7.79139e-07	0.996917	1.60354e-05	4.70557e-07	1.1159e-05	2.369e-05	2.75927e-05	8.73814e-06	0.000188065	5.84674e-07	0.00249922	6.70177e-07	2.73104e-05	0.000222826	9.04796e-06	1.19094e-06	4.56115e-05
AS160;595;	3.19458e-07	0.981506	1.47119e-06	9.66506e-08	4.73816e-06	1.63118e-05	2.19369e-05	2.3745e-06	0.000499593	7.54469e-08	0.0178798	8.98307e-08	1.23036e-05	7.91466e-06	3.41562e-06	1.8306e-07	4.30082e-05
CBP37;1454;	0.000232944	0.747712	0.117139	0.000346878	0.008242	0.00992419	0.00707738	0.0141595	0.0147633	0.000385079	0.0154093	0.00022522	0.00164187	0.045772	0.0113664	0.000246459	0.00535576
EHBP1;1061;	6.60012e-05	0.181284	0.00309405	9.42411e-05	0.000331708	0.00059722	0.000392891	0.0016058	0.00125289	0.000323253	0.00848122	0.000252939	0.000443036	0.800595	0.000570196	0.000194511	0.000421366
AKT2;447;	0.000173658	0.596401	0.00430971	8.85186e-05	0.0254743	0.124926	0.0288839	0.0245635	0.096099	3.10603e-05	0.0102859	1.77429e-05	0.000483553	0.000802804	0.0787395	2.27166e-05	0.00869684
ARHGEF18;591;	0.146551	0.00569361	0.00112805	0.00197029	0.049474	0.103259	0.169699	0.00768572	0.224599	0.000209071	0.0313747	0.000206049	0.0339155	0.000422477	0.0229331	0.000474813	0.200404
OLFR303;84;	0.432244	0.012294	0.0123191	0.141855	0.0219235	0.0247351	0.025816	0.0224596	0.021776	0.0249249	0.0240724	0.0254471	0.0965019	0.0140216	0.01779	0.0457374	0.0360827
NHE1;687;	6.2985e-06	0.993866	0.000164339	4.70067e-06	8.54323e-05	0.000239147	0.00013358	0.000297613	0.000698172	5.81135e-06	0.00269181	4.29202e-06	4.23359e-05	0.00147847	0.000162907	4.68593e-06	0.000114673
RPS6KA1;45;	0.0092236	0.000165069	0.000144852	0.000198213	0.528631	0.149982	0.242576	0.000720333	0.0114692	6.17326e-06	0.000246695	4.08047e-06	0.000615431	1.02135e-05	0.023284	8.95518e-06	0.0327136
IRS2;343;	0.000171926	0.108362	0.794315	0.000313627	0.0122247	0.0128803	0.00724921	0.0184201	0.00817899	0.000197726	0.00366806	9.44511e-05	0.000788268	0.00852653	0.0199477	0.000102155	0.0045597
AKT1S1;318;	1.72258e-07	0.998701	3.86038e-06	9.88778e-08	2.66046e-06	5.75082e-06	6.69931e-06	2.17707e-06	5.91356e-05	1.27261e-07	0.00115491	1.47106e-07	5.90264e-06	4.35686e-05	2.22709e-06	2.54985e-07	1.08196e-05
FOXO1;316;	3.14418e-05	0.0606386	0.000839977	3.45644e-05	0.000124146	0.000165449	0.000195528	0.000183372	0.000775274	0.000169803	0.0197464	0.00032871	0.00108095	0.914759	0.0001092	0.000479955	0.000337167
AS160;324;	3.00566e-08	0.999609	3.76481e-07	1.36872e-08	5.26919e-07	1.37179e-06	1.6438e-06	3.59592e-07	2.02908e-05	1.38404e-08	0.000359947	1.55314e-08	9.80133e-07	2.71711e-06	4.26466e-07	2.81681e-08	2.63599e-06
CBLB;886;	1.17526e-06	0.998027	3.14134e-05	7.97139e-07	1.56298e-05	4.58929e-05	2.85605e-05	4.82996e-05	0.000194361	1.03319e-06	0.0012411	8.52998e-07	1.05075e-05	0.000296925	2.72553e-05	9.79746e-07	2.86656e-05
FAM193A;683;	0.00961063	0.00117769	0.00131558	0.000714147	0.298175	0.314437	0.169501	0.00751085	0.0336183	3.7669e-05	0.00134527	2.28e-05	0.00145456	7.50722e-05	0.120451	4.02721e-05	0.0405135
AKT2;313;	8.95618e-05	0.566079	0.0204238	0.000136143	0.00123193	0.00152438	0.0014978	0.00171935	0.00378157	0.00029753	0.0141126	0.000259835	0.0015755	0.383872	0.00120093	0.000324301	0.00187405
DOCK7;2119;	5.66228e-07	0.936047	2.62834e-06	1.81235e-07	6.43239e-06	1.99136e-05	2.56252e-05	3.94664e-06	0.000540449	1.65949e-07	0.0632561	2.09398e-07	2.19783e-05	2.01409e-05	4.95203e-06	4.18435e-07	4.95322e-05
MCG_23367;44;	0.000120153	0.926035	0.00184886	6.95575e-05	0.00433243	0.00860327	0.00666736	0.00180469	0.0214468	4.07521e-05	0.0166798	3.1405e-05	0.00115326	0.00264349	0.00360892	5.16977e-05	0.00486209
KIAA0663;312;	0.000233608	0.00174695	0.00072355	0.000516075	0.000113524	0.000127557	0.000132216	0.000309506	0.000279091	0.0294505	0.00249173	0.37658	0.00152745	0.498508	0.000118586	0.0869396	0.00020214
NBAS;1382;	0.00284633	0.000240968	0.000173606	0.00014368	0.337758	0.287794	0.294318	0.00100814	0.00964522	5.56989e-06	0.000229055	3.4605e-06	0.000464685	1.31051e-05	0.0285575	7.10201e-06	0.0367918
PDE3B;458;	2.50616e-08	0.999743	3.25227e-07	1.15145e-08	4.68599e-07	1.22373e-06	1.41786e-06	3.14874e-07	1.68855e-05	1.13778e-08	0.00023072	1.24302e-08	7.53827e-07	2.17644e-06	3.83363e-07	2.22986e-08	2.13632e-06
EPB4.1L2;39;	0.000264645	0.0340274	0.00165719	0.000241797	0.000417108	0.000499282	0.000770663	0.000463804	0.00265227	0.00159698	0.0943557	0.00815672	0.0225097	0.805842	0.00028957	0.0244086	0.00184639
APBB1IP;532;	3.63478e-06	0.000674933	0.00126452	1.19246e-05	1.57598e-05	1.60525e-05	1.48951e-05	4.9084e-05	2.76329e-05	0.000119442	0.00011742	9.97995e-05	3.4872e-05	0.997452	1.85922e-05	6.01549e-05	1.90864e-05
CABLES1;251;	0.000867408	0.0169044	0.0522951	0.00276573	0.00183195	0.00154317	0.00199801	0.00319943	0.00312051	0.0271915	0.0121616	0.0509864	0.0122714	0.761642	0.00151581	0.0462398	0.00346607
KIAA0819;494;	0.676395	0.00350645	0.000792663	0.00491247	0.0122931	0.0163021	0.0327225	0.0039693	0.0448761	0.000664729	0.0288919	0.000919496	0.10539	0.000738583	0.00589827	0.00274569	0.0589812
CD248;756;	0.220888	0.00202015	0.00359374	0.00873512	0.292102	0.0691999	0.17222	0.00495314	0.0411241	0.000346081	0.00451213	0.000277644	0.0307387	0.000329801	0.033276	0.000774472	0.114909
KIAA1272;715;	1.68835e-05	0.966852	0.000584603	1.38711e-05	0.000214627	0.000330454	0.000362842	0.000185497	0.00172381	2.32062e-05	0.0156512	2.58826e-05	0.000457349	0.0128486	0.000177172	4.2357e-05	0.000490108
ABHD15;142;	1.91807e-05	0.0763093	7.36826e-05	4.05963e-06	0.00425064	0.0534091	0.0304543	0.000320147	0.818006	1.10275e-06	0.00450566	8.56173e-07	0.000127586	2.41198e-05	0.00262786	1.56924e-06	0.00986483
EXOC1;550;	0.505127	6.16087e-05	0.000268493	0.488057	0.000650068	0.000379785	0.000339347	0.00054318	0.000190938	0.00137225	0.000112689	0.000636463	0.000560235	7.2646e-05	0.000541515	0.000799471	0.000286562
NCL;212;	0.000125977	0.000285826	0.0109881	0.00276842	0.000123207	8.77328e-05	7.47757e-05	0.000480838	7.69772e-05	0.889016	0.000150868	0.0615692	0.000207264	0.028578	0.000153808	0.00523283	8.0494e-05
IRS1;325;	0.000263031	0.409046	0.00321739	0.000153059	0.0023704	0.00237217	0.00588398	0.000520101	0.0237742	0.000214394	0.380242	0.000437509	0.115705	0.0345828	0.000816375	0.00187408	0.0185281
RBM3;133;	0.972762	0.000102207	0.000159094	0.0028501	0.00504657	0.00251565	0.00461363	0.000335696	0.0013228	4.94799e-05	0.00027016	4.27332e-05	0.00354056	2.77218e-05	0.00121639	0.000127085	0.00501802
MENTHO;210;	0.00150001	0.00051144	0.000190746	9.14692e-05	0.0652125	0.0171402	0.246578	0.000143948	0.0309359	7.60061e-06	0.00116677	7.90239e-06	0.0189872	2.5566e-05	0.00166632	3.04779e-05	0.615804
AHNAK;3088;	0.000892899	0.00360294	0.893011	0.0150083	0.00357419	0.00200333	0.00153543	0.00717804	0.00106658	0.021949	0.000996269	0.00461936	0.00150431	0.0348168	0.00408949	0.00281886	0.00133311
ABPL;2234;	1.01297e-07	0.994518	5.84938e-07	3.21881e-08	1.64742e-06	5.96775e-06	7.10086e-06	1.05506e-06	0.000178239	2.62034e-08	0.00526781	2.95792e-08	2.90485e-06	2.7632e-06	1.37567e-06	5.51122e-08	1.20263e-05
CABLES1;376;	1.02453e-05	0.925573	8.10943e-05	4.84544e-06	8.01995e-05	0.000187888	0.000243304	6.19243e-05	0.00183236	6.0272e-06	0.0690506	8.32149e-06	0.000517592	0.00173327	6.10743e-05	1.68487e-05	0.000531098
KIAA0540;2813;	8.50138e-05	0.00612284	0.00290288	0.000242012	0.000149597	0.00022703	0.000141636	0.00171457	0.000317579	0.00292499	0.00155084	0.00155206	0.000224257	0.980916	0.000316559	0.00046218	0.000149551
D10ERTD749E;216;	0.73914	0.000340194	0.00069319	0.223334	0.00149602	0.00110896	0.0010768	0.00139624	0.000857637	0.00752936	0.000803913	0.00624468	0.00392968	0.000475543	0.00122154	0.00923935	0.00111246
EAAT1;523;	2.26407e-07	0.99866	3.63411e-06	1.20897e-07	3.63552e-06	8.29601e-06	9.7325e-06	2.88248e-06	8.46308e-05	1.40308e-07	0.00116234	1.55217e-07	6.91444e-06	3.88573e-05	3.02878e-06	2.70808e-07	1.46874e-05
GAB2;211;	0.000546569	0.251359	0.527237	0.000856905	0.0168068	0.0112965	0.0166476	0.00447594	0.0224816	0.000849997	0.0270869	0.000788833	0.0175024	0.0675307	0.0074735	0.00158231	0.0254778
AF6;1802;	1.46598e-06	0.9914	3.32214e-05	9.18976e-07	1.92343e-05	3.55353e-05	4.63722e-05	1.42703e-05	0.000331754	1.34587e-06	0.00731526	1.69475e-06	6.62786e-05	0.000632661	1.43856e-05	3.15149e-06	8.20211e-05
AMOTL1;913;	0.000739928	0.0341066	0.103356	0.00272303	0.0023562	0.00295	0.00199045	0.0117838	0.00277954	0.00973517	0.00627211	0.00471146	0.0025538	0.805231	0.0038251	0.00269986	0.00218687
CEP170;463;	7.58312e-05	0.875392	0.000565477	2.79227e-05	0.00342694	0.0116481	0.00680379	0.00191655	0.0650289	1.41234e-05	0.0262361	1.07239e-05	0.000444566	0.000507902	0.00422124	1.62425e-05	0.00366346
FAM188B;310;	0.605262	9.37158e-05	0.000542777	0.382677	0.00248774	0.00111899	0.00104536	0.00144823	0.000414507	0.000717727	0.000149291	0.000287687	0.00069862	7.24159e-05	0.00187265	0.000383463	0.000728453
IFNGR;398;	0.000559115	0.00337691	0.0504442	0.00677779	0.000673651	0.000687994	0.000430519	0.00939603	0.000556037	0.482049	0.00120548	0.0357259	0.00060675	0.401714	0.00144928	0.00394841	0.000399093
TSC2;981;	7.67954e-07	0.980739	5.61611e-06	3.37806e-07	6.23898e-06	1.70678e-05	1.78677e-05	7.51585e-06	0.000212329	4.50774e-07	0.0188142	5.64318e-07	2.07417e-05	0.000120372	6.22142e-06	9.38564e-07	2.95046e-05
IRS1;460;	0.000118699	0.00600262	0.971201	0.000474893	0.00295717	0.00176439	0.00135776	0.00231916	0.000967697	0.000330182	0.000637257	0.00014254	0.000542067	0.00724671	0.00267814	0.000161038	0.00109884
IGF1R;1165;	0.000433519	0.157548	0.553117	0.00114143	0.00901565	0.00697859	0.0060136	0.0116201	0.0079819	0.00182614	0.00975974	0.000984613	0.00320543	0.21503	0.00915243	0.00103994	0.00515177
SHC;139;	7.01557e-06	0.0836548	1.10957e-05	1.24667e-06	0.000112579	0.000450471	0.000853424	3.22153e-05	0.0908063	6.80683e-07	0.821967	8.0992e-07	0.000224717	2.41457e-05	6.4954e-05	1.79082e-06	0.00178693
VAMP4;15;	1.76114e-05	0.982731	0.000419044	1.01879e-05	0.000543962	0.00186694	0.000778532	0.00126924	0.00501495	7.36101e-06	0.00505219	4.91698e-06	8.12183e-05	0.000499059	0.00123784	5.81787e-06	0.000460274
NCL;189;	0.000228855	0.000514435	0.0317843	0.00525433	0.000261365	0.000171548	0.000149706	0.000848268	0.000147711	0.8375	0.000267415	0.0748612	0.000402184	0.0381251	0.00030596	0.00901804	0.000159222
BAT2;799;	0.000190984	0.899717	0.00168754	0.000114585	0.00182368	0.00773285	0.0027023	0.031206	0.0138779	0.000103623	0.024967	6.03399e-05	0.000414197	0.00632325	0.007338	5.31973e-05	0.00168786
MAP4K6;704;	0.000159219	0.123397	0.00101095	0.000142276	0.000325851	0.000640165	0.000564653	0.00134414	0.0022242	0.000615558	0.0452391	0.00084214	0.0016023	0.819871	0.000448725	0.00075289	0.000819314
ARFGAP2;445;	0.997162	4.26012e-06	1.16786e-05	0.00182719	0.000317431	0.000155631	0.000124395	6.14276e-05	3.26221e-05	5.22857e-06	6.56985e-06	2.52616e-06	3.09235e-05	1.5554e-06	0.000186334	4.33453e-06	6.54073e-05
TSC2;939;	3.23489e-07	0.998904	4.52018e-06	1.46715e-07	8.93887e-06	2.47763e-05	2.53863e-05	4.06137e-06	0.000232281	1.09075e-07	0.000734205	1.07514e-07	7.77773e-06	1.37523e-05	6.83713e-06	1.96926e-07	3.2661e-05
IRS1;267;	2.69546e-06	0.994024	7.80941e-05	1.77076e-06	4.73615e-05	0.000104576	9.68317e-05	5.67378e-05	0.000677372	2.08467e-06	0.00422873	1.99992e-06	4.69201e-05	0.000456963	5.10882e-05	2.90371e-06	0.000119893
LIMK;310;	0.00304952	1.11134e-05	0.000243837	0.994973	0.000237547	0.000105765	5.91648e-05	0.00050448	2.4858e-05	0.000256002	9.73769e-06	3.79563e-05	2.31631e-05	1.34336e-05	0.00039347	2.60061e-05	3.13436e-05
MCG_2696;566;	0.808159	0.000171971	0.000351695	0.171584	0.00084046	0.000629013	0.000648698	0.000787769	0.000461333	0.00384439	0.000402994	0.00313127	0.00241643	0.000243708	0.00065925	0.0049693	0.000698652
PRKAB1;101;	6.09402e-05	0.000136478	0.00184963	0.00110211	4.40837e-05	3.79039e-05	2.69248e-05	0.000334487	3.25094e-05	0.960454	7.12554e-05	0.0210989	5.67727e-05	0.0135326	7.44777e-05	0.0010617	2.56875e-05
NCKAP5L;494;	0.000103432	0.00217109	0.0338354	0.000606696	0.000262905	0.000196128	0.000207307	0.000521373	0.000281409	0.0151183	0.000878438	0.0153283	0.000872967	0.9216	0.000243271	0.00749389	0.000278512
MTSS1L;419;	0.967266	0.000114757	4.55619e-05	0.000394534	0.00435458	0.00581963	0.00838636	0.00040759	0.00349859	1.3611e-05	0.000404455	1.13744e-05	0.00136077	1.40579e-05	0.00163432	2.68982e-05	0.00624719
PDE3B;334;	8.74787e-07	0.798829	3.07116e-06	2.31342e-07	1.22923e-05	4.2589e-05	6.44216e-05	5.4447e-06	0.00216956	1.75356e-07	0.198673	2.17531e-07	3.84653e-05	1.48938e-05	8.23627e-06	4.63747e-07	0.000137495
CLASP2;241;	0.999788	1.4312e-06	1.13654e-06	4.1582e-05	2.60941e-05	2.36154e-05	2.70774e-05	6.7638e-06	1.55596e-05	9.53436e-07	4.79523e-06	7.96628e-07	2.20949e-05	4.16027e-07	1.4288e-05	1.78021e-06	2.35159e-05
RGC32;101;	0.000986034	6.66492e-05	7.10827e-05	5.43906e-05	0.453486	0.325438	0.0537799	0.00121466	0.00333368	1.87362e-06	6.06451e-05	9.88077e-07	5.73771e-05	3.40706e-06	0.158255	1.63398e-06	0.00318917
BC059842;2958;	2.78545e-06	0.593192	1.51148e-05	1.07536e-06	1.99045e-05	4.85019e-05	6.67672e-05	1.74637e-05	0.000942249	1.47378e-06	0.405081	2.17299e-06	0.0001362	0.000312123	1.58995e-05	4.2811e-06	0.000140616
IRS2;305;	1.99399e-05	0.300857	0.000185453	8.9087e-06	0.000171665	0.000292875	0.0005454	9.08302e-05	0.00576888	1.25017e-05	0.686438	2.1e-05	0.00206703	0.00187331	0.0001004	5.06729e-05	0.00149597
IFNGR;381;	0.000140607	0.0981959	0.000501537	7.1887e-05	0.000297383	0.000480415	0.000772584	0.000296827	0.0045131	0.000210645	0.810906	0.000628238	0.0158705	0.0630586	0.00020869	0.00170985	0.00213686
TNS1;1489;	1.27134e-05	0.98504	0.00131275	1.09151e-05	0.000467137	0.000655853	0.000697576	0.000235198	0.00266846	1.10528e-05	0.00530896	9.74432e-06	0.000275103	0.00216643	0.00034357	1.60112e-05	0.000768214
5730494N06RIK;25;	0.947539	8.80648e-05	0.000333383	0.0165147	0.0120373	0.00554165	0.00391572	0.00226633	0.000846112	6.84022e-05	0.00012403	3.08767e-05	0.000427172	2.53616e-05	0.00843667	4.75158e-05	0.00175747
SH3D19;368;	0.101511	3.60305e-05	0.000202604	0.893869	0.000337724	0.000219491	0.000171805	0.000623005	9.38364e-05	0.00139808	5.45667e-05	0.000396946	0.000189524	5.1035e-05	0.000393216	0.000317779	0.000133951
BICD2;411;	0.291373	0.000456167	0.00084743	0.0061976	0.165086	0.182741	0.0391368	0.019582	0.0060382	6.77731e-05	0.000445645	2.99463e-05	0.000706192	6.01405e-05	0.278782	4.33879e-05	0.00840692
PLEC1;3889;	0.999566	2.35328e-06	1.51264e-06	4.19599e-05	7.43446e-05	8.94791e-05	6.56089e-05	1.69006e-05	2.94723e-05	7.36617e-07	5.58744e-06	4.90419e-07	1.50719e-05	4.63281e-07	5.18227e-05	9.27259e-07	3.69223e-05
PRKAA1;496;	6.3235e-07	0.918674	2.4835e-06	1.74455e-07	9.11758e-06	3.42059e-05	4.16068e-05	5.47765e-06	0.00145926	1.35351e-07	0.0796665	1.56612e-07	1.72964e-05	1.10193e-05	7.49579e-06	2.98147e-07	6.98216e-05
NF1;2545;	0.99935	1.11446e-06	2.14971e-06	0.000526613	2.19996e-05	1.40613e-05	1.4791e-05	8.2781e-06	6.69794e-06	3.19347e-06	2.53864e-06	2.08532e-06	1.59281e-05	6.12101e-07	1.33952e-05	4.04347e-06	1.24062e-05
AKAP12;1292;	0.000376824	0.0717431	0.0804954	0.000935614	0.00212056	0.00238041	0.00221352	0.00487079	0.00384942	0.0029421	0.0116385	0.00241443	0.00381716	0.802576	0.00237071	0.00221311	0.00304256
BAG4;179;	5.68342e-06	0.989418	0.000167892	3.40225e-06	0.000123388	0.000370149	0.000317976	0.000229412	0.00221045	3.16135e-06	0.0060914	2.70863e-06	7.29539e-05	0.000415654	0.00016611	3.64816e-06	0.000398122
SVIL;1045;	0.530264	0.000186772	0.00122151	0.415409	0.00737043	0.00490423	0.00194365	0.0168573	0.000738365	0.000595516	0.00019174	0.000149416	0.000339916	9.90542e-05	0.0187802	0.000132386	0.000816168
PPP1R9B;100;	0.999854	5.17363e-07	7.66907e-07	7.33249e-05	1.52494e-05	1.17363e-05	1.0665e-05	4.16921e-06	4.01402e-06	5.48506e-07	1.08373e-06	3.45918e-07	5.63248e-06	1.8835e-07	9.3023e-06	6.69153e-07	7.80678e-06
AZI1;114;	7.67606e-07	0.883283	4.12775e-06	2.35373e-07	1.30616e-05	3.61098e-05	6.36114e-05	4.97301e-06	0.00173782	1.94564e-07	0.114639	2.47194e-07	4.50906e-05	1.92497e-05	7.70596e-06	5.47505e-07	0.000143607
EHBP1L1;1462;	1.34455e-05	0.525135	2.52368e-05	2.58818e-06	0.000226271	0.0012372	0.00172146	7.71736e-05	0.0990985	1.30265e-06	0.368281	1.45244e-06	0.000351726	5.65792e-05	0.000154088	3.04031e-06	0.003613
STX4;251;	3.52375e-05	0.916526	0.000132256	1.28722e-05	0.000286742	0.000867715	0.000893665	0.000225149	0.00670655	1.1094e-05	0.0705081	1.26012e-05	0.000775604	0.00132496	0.000249795	2.34837e-05	0.0014086
BICD2;331;	0.00011728	4.81282e-05	1.57773e-05	5.78246e-06	0.0888703	0.23153	0.637515	9.14919e-05	0.0112495	3.69561e-07	5.82632e-05	2.59965e-07	6.0774e-05	1.22841e-06	0.00384483	5.53036e-07	0.0265906
CYTSA;71;	0.993676	6.78879e-05	4.08156e-05	0.00230879	0.000351755	0.000376737	0.000402491	0.000264286	0.000345559	0.000113883	0.000232351	0.00010524	0.00079823	3.5296e-05	0.00027523	0.000200781	0.000404417
RAD17;70;	0.00168552	0.0127713	0.0229165	0.00113583	0.322349	0.0649695	0.263155	0.00434477	0.0430556	0.000180985	0.00488869	0.000129941	0.0165953	0.00118506	0.0257853	0.000328586	0.214523
KIAA0638;1039;	9.67261e-06	0.462391	2.42969e-05	2.29983e-06	0.000140838	0.00039761	0.000647824	3.84924e-05	0.0196652	1.56346e-06	0.514907	1.96623e-06	0.000431319	9.09613e-05	7.62862e-05	4.61346e-06	0.00116929
AS160;651;	1.57647e-05	0.0149115	0.00309392	3.25166e-05	9.47226e-05	0.000117598	0.000100978	0.00035547	0.000260393	0.000187333	0.00143052	0.000154513	0.000150082	0.978737	0.000128319	0.00011037	0.000118912
PAR3;1173;	0.000548082	0.220324	0.000694675	0.000206431	0.000908989	0.00176928	0.00211607	0.000969069	0.0120959	0.000383548	0.693842	0.000755301	0.0156903	0.0434599	0.000751116	0.00163384	0.0038517
GAB2;388;	1.06584e-05	0.85917	0.000149874	6.0894e-06	7.42926e-05	0.000150812	0.000191762	7.9677e-05	0.00153335	1.12369e-05	0.131736	1.7099e-05	0.000524286	0.00584683	6.24515e-05	3.10179e-05	0.00040502
CEP170;1150;	4.67349e-06	0.911249	4.28477e-05	1.60128e-06	0.000103813	0.000330614	0.000432877	6.40274e-05	0.010606	1.24184e-06	0.0761447	1.33639e-06	0.000117063	8.82892e-05	8.53297e-05	2.38938e-06	0.000724696
AS160;320;	0.000270944	0.824778	0.00142158	0.000117097	0.00466779	0.0333613	0.00748173	0.0416284	0.0369828	5.6261e-05	0.0205052	3.23938e-05	0.000465513	0.0018838	0.0227492	3.42326e-05	0.00356374
PFKFB2;486;	4.79762e-08	0.999681	5.65363e-07	1.8999e-08	1.53841e-06	4.92753e-06	5.65337e-06	6.80675e-07	7.69235e-05	1.34433e-08	0.000216957	1.32931e-08	1.21634e-06	1.47149e-06	1.15161e-06	2.45421e-08	7.59878e-06
HMOX1;252;	2.2212e-05	0.81924	0.000264784	7.91649e-06	0.00248677	0.00632166	0.0129306	0.000264611	0.124296	3.45755e-06	0.0171858	3.14677e-06	0.000586468	0.000154825	0.000953894	6.54826e-06	0.0152713
NDR3;331;	1.27905e-06	0.914129	4.66188e-06	3.11309e-07	3.07342e-05	0.000126032	0.00018718	9.95511e-06	0.0109541	1.88226e-07	0.0741592	2.08871e-07	4.00602e-05	1.11807e-05	1.97258e-05	4.31628e-07	0.000325266
ABHD15;425;	3.38647e-07	0.980636	2.56678e-06	1.36227e-07	3.47177e-06	9.45088e-06	1.16729e-05	2.82424e-06	0.00016802	1.57315e-07	0.0190928	2.03748e-07	1.35757e-05	3.28416e-05	2.88688e-06	3.83509e-07	2.26715e-05
KIAA0066;379;	3.39863e-05	0.119064	9.14728e-05	9.2302e-06	0.000328823	0.000670598	0.00131877	0.000115583	0.0244516	7.59539e-06	0.848468	1.07682e-05	0.001901	0.000351698	0.000176616	2.59804e-05	0.00297421
DOCK11;1267;	1.25801e-06	0.258897	3.31147e-06	2.96159e-07	1.6222e-05	5.45894e-05	9.34866e-05	6.02664e-06	0.00389744	2.14382e-07	0.736716	2.77756e-07	6.66195e-05	1.50865e-05	9.80686e-06	6.31312e-07	0.00022183
MDM2;165;	5.51275e-05	2.92857e-05	5.10905e-06	2.32724e-06	0.00962489	0.00793231	0.701189	1.47338e-05	0.0105467	1.93713e-07	5.78124e-05	1.69127e-07	0.000155483	7.64206e-07	0.000238856	4.74763e-07	0.270147
PTPN12;434;	0.6384	0.000101239	0.000392176	0.350103	0.000852436	0.000536862	0.000520756	0.000701434	0.000312651	0.00221812	0.000207707	0.00131148	0.00119808	0.000125512	0.000669176	0.00184462	0.000504674
FRAP;2069;	0.231917	0.00134883	0.00577385	0.0209746	0.301501	0.101227	0.121796	0.0213754	0.0195062	0.000389152	0.0019149	0.000209299	0.00627355	0.000270065	0.10811	0.000365	0.0570485
IRS1;324;	1.2779e-05	0.551018	7.33839e-05	5.50006e-06	7.9329e-05	0.000164544	0.00022986	5.81195e-05	0.0023711	8.05592e-06	0.442749	1.29567e-05	0.000779381	0.00185368	5.76497e-05	2.79367e-05	0.000499312
NCOR1;598;	0.000140934	0.000731167	0.0062297	0.00142054	0.000126857	0.000115182	9.46639e-05	0.000641703	0.000126809	0.497793	0.000385421	0.131452	0.000319705	0.352055	0.000174564	0.00808376	0.000109375
SIN3A;861;	0.00137789	0.00233311	0.0234835	0.010302	0.00195754	0.00294381	0.0010007	0.926834	0.000972377	0.00700653	0.000747853	0.000805969	0.000262885	0.0050717	0.0140632	0.000254174	0.000582678
MCG_51138;25;	0.355212	0.00107155	0.00285112	0.36188	0.00738658	0.0103107	0.00314973	0.205146	0.0022769	0.00465813	0.00102376	0.00091247	0.000778586	0.000734251	0.0406212	0.000500338	0.0014859
RAPGEF1;329;	0.903946	0.000826663	0.000326948	0.00240329	0.0072968	0.00927024	0.0147222	0.00163518	0.0132764	0.000169309	0.00451156	0.000186079	0.0173333	0.000155815	0.00341719	0.000490288	0.0200324
APC;2374;	0.202014	4.77427e-05	0.000212624	0.792214	0.000423907	0.000257906	0.000214511	0.000485523	0.000125728	0.00169121	7.92695e-05	0.000627312	0.000329342	6.56913e-05	0.000407253	0.00063015	0.000173352
ANAPC2;549;	0.00012525	0.00110364	0.0082779	0.00110679	0.000147522	0.000138205	0.000106131	0.000894216	0.00015223	0.197765	0.000468826	0.0438831	0.000278511	0.74121	0.000224151	0.00400517	0.000113838
SAMD4;168;	0.000122662	0.770983	0.000398458	5.80026e-05	0.000369411	0.00109889	0.000763562	0.00149127	0.00578745	0.000105104	0.196059	0.000115011	0.000859862	0.0201282	0.000618365	0.000125249	0.000916213
FAM125A;168;	0.895464	0.000123723	0.000364494	0.0675631	0.00481847	0.00466867	0.00159886	0.0101246	0.000564305	0.00017005	0.000126757	5.15235e-05	0.000211695	4.80941e-05	0.0134133	5.17771e-05	0.00063634
KIAA1753;411;	4.4507e-05	0.0354144	0.000310997	1.2119e-05	0.0345471	0.0860814	0.241582	0.000474007	0.521506	2.89224e-06	0.00362584	2.24873e-06	0.000491867	5.31735e-05	0.00552604	4.69725e-06	0.0703211
IRS2;303;	9.44272e-07	0.996729	3.66328e-05	6.21373e-07	2.00518e-05	3.54894e-05	4.62148e-05	1.11433e-05	0.000297383	7.40119e-07	0.00245014	8.33789e-07	3.96016e-05	0.000239677	1.385e-05	1.55836e-06	7.64916e-05
NCAM;1005;	0.000595456	0.677358	0.0376642	0.000580402	0.0128117	0.0155859	0.0217214	0.0119684	0.0526383	0.000605072	0.0752021	0.000515336	0.00960542	0.0433808	0.0101554	0.000761926	0.0288502
INPP5E;236;	0.988828	2.12529e-05	4.63459e-05	0.00287493	0.00178557	0.00162015	0.000647305	0.000875896	0.000178203	1.29507e-05	2.7532e-05	5.35798e-06	5.82963e-05	5.43499e-06	0.00276094	7.11894e-06	0.00024483
R3HDM1;299;	8.23317e-05	0.0416295	0.0001995	2.23443e-05	0.000488776	0.00073017	0.00241773	9.04057e-05	0.0184963	1.8398e-05	0.809671	3.84301e-05	0.107662	0.000883452	0.000158063	0.000171283	0.0172406
AS160;649;	9.23974e-06	0.0179556	0.000656995	1.35778e-05	4.34248e-05	6.10942e-05	6.01311e-05	0.000110042	0.000198005	7.14238e-05	0.00243385	9.39734e-05	0.000167578	0.977894	4.90493e-05	9.10933e-05	9.10022e-05
BRF1;334;	4.96961e-05	2.77965e-05	9.99475e-06	3.01957e-06	0.0408173	0.0281361	0.85745	3.34991e-05	0.00754634	2.21396e-07	3.90126e-05	1.68114e-07	6.12687e-05	7.70522e-07	0.00087965	3.95819e-07	0.0649451
KIAA1562;778;	0.000324763	0.100665	0.00231814	0.000304634	0.000816151	0.00103153	0.00137738	0.00095151	0.00429515	0.00123055	0.0691483	0.00263966	0.0115754	0.795106	0.000618527	0.0051661	0.00243133
TNS1;572;	2.4924e-06	0.931149	1.03962e-05	6.237e-07	8.18958e-05	0.000310329	0.000532411	1.60842e-05	0.0231511	3.33194e-07	0.0435638	3.67168e-07	9.98183e-05	1.88105e-05	4.12018e-05	8.18213e-07	0.00102074
IRS1;522;	0.00066738	0.196012	0.00375623	0.000486618	0.00176899	0.00212095	0.00351794	0.00102326	0.0113626	0.00128342	0.251157	0.00358401	0.0935021	0.40633	0.000972466	0.0138401	0.00861575
AKT1;477;	0.000226732	0.735149	0.000509655	5.88089e-05	0.00622658	0.0341602	0.0203341	0.00279564	0.135704	2.25249e-05	0.0433411	1.79012e-05	0.00128098	0.000721721	0.00655534	3.01888e-05	0.0128652
PDE3B;459;	5.42581e-08	0.999778	8.64624e-07	2.57848e-08	1.47189e-06	4.05198e-06	3.92583e-06	9.01793e-07	4.06047e-05	2.14297e-08	0.000159861	2.05629e-08	1.10488e-06	3.04554e-06	1.29316e-06	3.49404e-08	4.55521e-06
IRS1;270;	5.21302e-07	0.992043	4.55051e-06	1.87016e-07	1.19108e-05	3.28428e-05	4.08978e-05	4.32816e-06	0.000739367	1.42908e-07	0.00701807	1.60728e-07	1.80227e-05	1.40065e-05	7.86159e-06	3.25332e-07	6.4027e-05
DTX2;235;	4.44035e-05	0.320967	0.000267646	2.19578e-05	0.000187433	0.000326201	0.000503871	0.000132361	0.00358969	4.31155e-05	0.650398	9.03406e-05	0.00502353	0.0167441	0.000122678	0.000234907	0.00130335
AP1GBP1;936;	0.0001219	0.5162	0.00167479	0.000105899	0.000410772	0.000947516	0.000729197	0.0019752	0.00337587	0.000324484	0.0654935	0.000363767	0.00120545	0.405056	0.000651306	0.000330148	0.00103359
CABLES1;270;	8.44968e-07	0.996233	7.5565e-06	3.32235e-07	1.99593e-05	5.98981e-05	7.20726e-05	8.24964e-06	0.000719008	2.34842e-07	0.00270001	2.44869e-07	2.54812e-05	2.69369e-05	1.38003e-05	4.80527e-07	0.000111877
BAT2D;102;	0.000794458	6.30055e-05	0.000375663	0.000287407	0.422722	0.0498203	0.0103642	0.00442136	0.000664743	5.27256e-06	3.20623e-05	2.00753e-06	4.47492e-05	6.94213e-06	0.509305	2.79687e-06	0.00108827
CABLES1;272;	4.23517e-06	0.994137	0.00033387	3.14317e-06	0.00016449	0.00028603	0.000296169	8.41373e-05	0.00125187	2.87783e-06	0.00232035	2.5417e-06	9.33632e-05	0.000551507	0.000124889	4.23533e-06	0.000338896
PLEKHF2;226;	1.96292e-06	0.0702072	3.5322e-06	3.76575e-07	2.63025e-05	0.000100327	0.000167199	8.57736e-06	0.0125936	2.33073e-07	0.916438	2.89932e-07	7.3812e-05	1.06569e-05	1.59676e-05	6.47956e-07	0.000351186
AKT2;474;	2.71978e-06	0.397074	1.39293e-05	9.96398e-07	1.90283e-05	4.82475e-05	6.44319e-05	1.72681e-05	0.00102039	1.323e-06	0.601233	1.93706e-06	0.000120346	0.000227812	1.5719e-05	3.73897e-06	0.000134619
CABLES1;203;	0.000337598	0.061867	0.509808	0.00121329	0.00308274	0.00355341	0.00203764	0.0329645	0.00321657	0.00361618	0.005089	0.0012398	0.00096723	0.361418	0.00730535	0.000661483	0.00162161
AKT2;478;	5.71996e-06	0.798039	2.49083e-05	2.12647e-06	4.033e-05	0.000100447	0.000134253	2.81185e-05	0.00152536	2.52084e-06	0.19898	3.62606e-06	0.000292396	0.000505399	2.98868e-05	7.6995e-06	0.00027817
KIAA0284;421;	4.1407e-06	0.872202	8.98507e-06	9.70879e-07	4.66263e-05	0.000225282	0.000219242	3.47718e-05	0.0065628	6.53805e-07	0.120227	7.07678e-07	6.86443e-05	4.24123e-05	4.53707e-05	1.28042e-06	0.000309261
FAM102B;298;	0.999715	5.7786e-07	1.03282e-06	0.000195443	1.84413e-05	1.44058e-05	9.3157e-06	1.11084e-05	3.87823e-06	9.00073e-07	1.02065e-06	4.19321e-07	2.85897e-06	2.25139e-07	1.93852e-05	5.84667e-07	5.01958e-06
CLMN;724;	0.000108735	6.89562e-06	1.35325e-05	9.78188e-06	0.942624	0.0300749	0.0114592	8.8888e-05	0.000241418	2.49201e-07	5.13351e-06	1.28203e-07	8.85064e-06	4.35161e-07	0.0147961	2.31068e-07	0.000561049
PLEKHM1;466;	0.000244449	0.826894	0.00382734	0.000160399	0.0057454	0.0296053	0.00760646	0.056518	0.0226338	8.35955e-05	0.0121951	4.40187e-05	0.000509282	0.00375217	0.0263132	4.4551e-05	0.00382334
NDR1;340;	8.7586e-06	0.278387	3.27484e-05	2.43693e-06	0.000133831	0.00031625	0.000715318	4.01457e-05	0.0188456	1.85703e-06	0.698732	2.48968e-06	0.000655922	0.000118655	6.65879e-05	6.02626e-06	0.00193472
GPRIN3;572;	3.52119e-06	0.00183534	2.15646e-06	5.55184e-07	9.79821e-06	2.55131e-05	5.64405e-05	3.69427e-06	0.000926449	4.32312e-07	0.996249	8.15156e-07	0.000617112	1.71864e-05	5.01446e-06	2.62486e-06	0.000244579
HSPA12B;276;	2.86743e-06	0.864401	1.9203e-05	1.21787e-06	2.23374e-05	5.17263e-05	6.89649e-05	1.91828e-05	0.000804016	1.7242e-06	0.133849	2.46079e-06	0.000133725	0.000464199	1.77147e-05	4.79671e-06	0.000134954
IRS1;1171;	5.47903e-05	0.0600341	0.00873953	8.97035e-05	0.00040305	0.000429234	0.000567797	0.000480861	0.00134932	0.000333918	0.00871989	0.000456489	0.00196579	0.91437	0.000308576	0.000679773	0.00101691
IRS1;608;	0.000127921	0.0475189	0.00163319	0.000142051	0.000276141	0.000467278	0.000413224	0.00106509	0.00140849	0.000805839	0.0203556	0.00112581	0.00125897	0.921535	0.000367635	0.000906539	0.000592375
BRF1;92;	9.97509e-06	0.920023	3.47596e-05	2.43768e-06	0.000400453	0.00293688	0.00175424	0.000191315	0.0576179	1.08486e-06	0.0152692	9.13189e-07	7.71168e-05	4.20508e-05	0.000460152	1.51737e-06	0.00117654
BRF2;98;	7.38707e-06	0.61711	2.41341e-05	1.96576e-06	0.000109532	0.000279629	0.000557234	2.65026e-05	0.0114623	1.41146e-06	0.368215	1.89272e-06	0.000631749	0.000111479	5.11361e-05	4.89951e-06	0.00140323
D8ERTD457E;441;	0.00487956	0.0535948	0.0278613	0.0128452	0.0052741	0.00790519	0.00488775	0.0531654	0.00744415	0.05206	0.0183751	0.0207045	0.00601396	0.700933	0.0106983	0.00880397	0.00455386
ASAP3;786;	0.00656797	3.1299e-05	0.00089945	0.986351	0.000713575	0.000357176	0.000187397	0.00248645	7.47707e-05	0.000499314	2.6819e-05	7.69768e-05	5.73168e-05	3.39359e-05	0.00148513	5.05082e-05	0.000100865
HAC1;455;	0.000119879	0.00621097	0.0006148	0.000168412	0.000112204	0.000157097	0.000145792	0.00041633	0.000446062	0.00281478	0.00697109	0.00767459	0.000886482	0.969213	0.000140861	0.00369828	0.000208972
JMY;134;	5.07875e-05	0.00148513	0.00231258	0.000233471	8.30247e-05	9.31024e-05	6.4982e-05	0.000607306	0.000116615	0.00753105	0.000443424	0.00293435	0.000127661	0.983083	0.000143684	0.000625455	6.46688e-05
APC;2726;	8.44713e-05	0.119407	5.15394e-05	1.44219e-05	0.000239304	0.0011223	0.000899287	0.000417924	0.0172373	1.11282e-05	0.857979	1.29083e-05	0.000585524	0.000406312	0.000319617	2.03827e-05	0.00119145
ABHD15;424;	1.64883e-05	0.0509627	2.80843e-05	3.8551e-06	7.00347e-05	0.000255928	0.000309477	9.3388e-05	0.00591065	3.60659e-06	0.941044	4.85569e-06	0.000338826	0.000187236	7.15755e-05	8.53021e-06	0.000690474
DRES9;1234;	8.72321e-05	0.529113	0.00156915	3.26189e-05	0.00433915	0.00688699	0.0186998	0.000564155	0.200976	1.9551e-05	0.179925	2.24415e-05	0.00574167	0.000851838	0.00147573	5.38475e-05	0.0496419
AS160;598;	0.00175489	4.49153e-06	4.59881e-05	0.997642	4.51767e-05	2.83708e-05	1.74373e-05	0.000123638	8.22614e-06	0.000179046	4.24956e-06	2.80664e-05	1.18405e-05	7.34669e-06	6.97785e-05	1.79903e-05	1.16513e-05
PFKFB2;469;	3.89117e-06	0.0613148	4.74393e-06	7.3068e-07	2.96907e-05	0.000114577	0.000155444	1.62723e-05	0.00627074	5.10375e-07	0.931663	6.42558e-07	9.89455e-05	2.46197e-05	2.25891e-05	1.33705e-06	0.000277101
IRS1;268;	2.23137e-05	0.568361	0.00014819	7.19022e-06	0.000395889	0.00106395	0.00168487	0.000226712	0.0391812	5.81808e-06	0.384524	6.68399e-06	0.000640776	0.000334264	0.000290541	1.2559e-05	0.00309313
AF013969;656;	7.35612e-05	6.35095e-06	1.73975e-05	8.51886e-06	0.973088	0.0103686	0.010424	5.31971e-05	0.000224078	2.49953e-07	5.09954e-06	1.35322e-07	1.08596e-05	4.34651e-07	0.00505211	2.60629e-07	0.000667161
MGF;694;	0.000317866	0.079592	0.0114099	0.000164882	0.0821577	0.424611	0.0881005	0.0278474	0.0759523	3.63761e-05	0.00490099	2.02894e-05	0.000783436	0.000576546	0.175994	2.82892e-05	0.0275073
KIAA1248;330;	0.142605	0.00711984	0.00265345	0.00790367	0.20223	0.185179	0.151524	0.0254158	0.0815686	0.000477962	0.0100472	0.000299791	0.0109403	0.000736304	0.116482	0.000536799	0.0542798
AKAP10;173;	4.24354e-06	0.0196266	1.54011e-05	8.34235e-07	0.000418276	0.00211365	0.00463588	3.61526e-05	0.960069	2.96178e-07	0.00744586	2.81523e-07	7.72379e-05	7.04773e-06	0.000168085	5.89433e-07	0.00538013
IRS1;131;	4.63129e-05	0.0154269	0.0011462	6.04834e-05	0.000117127	0.000155212	0.000167193	0.000211557	0.000516153	0.000387235	0.00807823	0.000826161	0.00108934	0.970365	0.00011172	0.00100642	0.000288458
ABI1;229;	3.2583e-06	0.00122696	2.74197e-06	5.00731e-07	1.7661e-05	3.29029e-05	0.000120202	2.79979e-06	0.00277454	3.32328e-07	0.992892	6.32627e-07	0.00214791	9.63021e-06	5.62925e-06	2.52869e-06	0.000759912
KIAA0731;1032;	1.16444e-06	0.00509679	2.55987e-06	3.11418e-07	5.61741e-06	1.24204e-05	2.5514e-05	3.09486e-06	0.000410154	3.6464e-07	0.994179	6.63789e-07	0.000142656	3.03422e-05	3.30257e-06	1.76687e-06	8.47129e-05
MTAP1B;1422;	0.000189466	0.394282	0.00389472	0.00015438	0.000914372	0.00118082	0.00162176	0.000761591	0.00755316	0.000476921	0.249275	0.000979955	0.0117506	0.321024	0.000637055	0.00210175	0.00320222
IRS1;481;	0.00162653	0.112776	0.00241262	0.000744519	0.00222744	0.00315971	0.00569506	0.00144078	0.0187104	0.00145906	0.452172	0.00441281	0.24495	0.111359	0.00125471	0.0186775	0.0169214
D1PAS1-RS2;606;	0.0176385	1.70289e-05	0.000272976	0.97921	0.000509022	0.000229032	0.000142293	0.000750632	5.2711e-05	0.000221342	1.79392e-05	4.67706e-05	5.23576e-05	1.59919e-05	0.000704065	3.97135e-05	7.95299e-05
COBLL1;287;	0.00102931	0.0752253	0.00350115	0.000802439	0.0010532	0.00169833	0.00194019	0.00204303	0.00662145	0.00390769	0.168909	0.0123591	0.0242403	0.672962	0.00100883	0.0186144	0.00408426
TJP1;1051;	0.999515	1.23536e-06	1.97484e-06	0.000303669	2.88941e-05	3.03538e-05	1.65561e-05	3.20108e-05	7.87658e-06	1.74781e-06	2.19385e-06	7.90443e-07	4.66928e-06	4.63783e-07	4.24821e-05	9.75843e-07	9.20227e-06
NHE1;707;	8.062e-06	0.0190471	1.13128e-05	1.24101e-06	0.000141073	0.000490372	0.00144145	2.34723e-05	0.22875	6.02727e-07	0.744326	7.68126e-07	0.000461035	1.63074e-05	5.81569e-05	1.94092e-06	0.00522111
NFAT3;217;	0.000153722	0.464577	0.0384395	0.000250994	0.00205819	0.00236911	0.00222218	0.00233158	0.0048827	0.000508857	0.0152934	0.000433208	0.00252125	0.458831	0.00189578	0.000564167	0.00266692
TMCC3;48;	1.14971e-05	0.000491706	0.00105769	4.09684e-05	2.67317e-05	2.28557e-05	2.61228e-05	4.75428e-05	4.36782e-05	0.00085991	0.000217197	0.00166331	0.000164938	0.994042	2.31643e-05	0.00122187	3.90208e-05
MDN1;4883;	0.00101126	0.000792137	0.000326143	0.000131794	0.0112216	0.00301204	0.0340084	0.000103853	0.014274	2.036e-05	0.0026942	2.98442e-05	0.684756	7.69736e-05	0.000575085	0.000191053	0.246776
CCM1;276;	1.47237e-05	0.00745515	1.7019e-05	3.74667e-06	3.07741e-05	5.90623e-05	0.000103582	1.66632e-05	0.00103135	5.17483e-06	0.98819	1.26334e-05	0.00233886	0.000341224	1.80311e-05	4.23652e-05	0.000319529
AF013969;240;	0.0117755	0.000122904	0.000743066	0.701996	0.000277916	0.000225693	0.000171	0.00125141	0.000143817	0.249417	0.000171106	0.0272191	0.00038867	0.000567189	0.000403962	0.00496412	0.000161615
DLGAP4;973;	0.990988	5.13026e-05	1.98301e-05	0.000300781	0.00126466	0.00234138	0.00153915	0.000409049	0.00081671	8.56351e-06	0.000128214	5.70186e-06	0.000203736	7.4139e-06	0.00113552	1.00355e-05	0.000769718
KANK1;325;	4.48537e-06	0.806851	1.72114e-05	1.36969e-06	4.45232e-05	0.000152734	0.000149355	4.68973e-05	0.00346935	1.28222e-06	0.188827	1.44738e-06	7.48756e-05	0.000106428	4.72387e-05	2.39636e-06	0.000202276
ILVBL;368;	0.000156341	0.00130504	0.00113441	0.000577192	9.03692e-05	0.000112174	9.00046e-05	0.0006263	0.000174924	0.0771069	0.00103062	0.105102	0.000382597	0.804877	0.000139379	0.00698237	0.000112579
IRS2;306;	9.80216e-06	0.919123	8.08053e-05	3.10296e-06	0.000260015	0.00107779	0.00125726	0.000121905	0.0251879	1.84387e-06	0.0500191	1.88777e-06	0.000226154	0.000108035	0.000207444	3.48634e-06	0.00231098
KIAA1999;1135;	0.000101404	0.232749	0.000337035	2.22433e-05	0.00933841	0.167152	0.0512279	0.00237747	0.487751	6.00488e-06	0.0140497	4.44416e-06	0.000448643	0.000134243	0.0116269	7.37351e-06	0.0226664
RAPGEF6;1078;	0.000138517	0.0366772	0.000172124	1.97592e-05	0.00400993	0.0190423	0.0505249	0.000334496	0.64786	5.75456e-06	0.0533374	6.15612e-06	0.00383273	0.000106567	0.001326	1.52821e-05	0.182591
GRLF1;1150;	4.09218e-05	0.00585119	2.82087e-05	4.69999e-06	0.000600176	0.00121139	0.0101575	3.53634e-05	0.491995	1.78372e-06	0.274014	2.64834e-06	0.0165765	3.03974e-05	0.000116632	9.59768e-06	0.199324
PTPN4;387;	0.000923436	0.000231013	0.000189454	0.000176595	0.000976984	0.000398015	0.00192513	4.90495e-05	0.00139534	3.95497e-05	0.00107376	8.82637e-05	0.981595	8.0393e-05	0.000134268	0.001026	0.00969811
CEP170;443;	0.810428	0.000199242	0.000817144	0.15739	0.00845698	0.00484992	0.00275943	0.00322276	0.00085592	0.000337879	0.000220347	0.000130746	0.000787832	9.41295e-05	0.00781011	0.000182903	0.00145736
DPYSL3;631;	0.000200998	0.12287	0.00242208	0.000186047	0.000481001	0.000777055	0.000856566	0.00129616	0.0038062	0.000963856	0.124373	0.00191896	0.00409325	0.731621	0.000531709	0.00205532	0.00154602
EDC4;796;	0.0016828	0.0249964	0.14584	0.00988798	0.00320016	0.00451652	0.00216538	0.175189	0.00321002	0.0790528	0.00595919	0.0117262	0.00141642	0.5154	0.0114225	0.00261646	0.00171861
HERC2;1578;	9.18649e-05	1.13834e-05	2.15977e-05	1.31006e-05	0.0406813	0.0511144	0.00254011	0.00131462	0.00022753	4.03025e-07	6.54256e-06	1.70461e-07	4.658e-06	6.99523e-07	0.903792	2.28786e-07	0.000179699
FAM188B;308;	1.27904e-05	0.453292	3.04128e-05	2.67225e-06	0.000209945	0.000932452	0.00103139	9.17862e-05	0.0626788	1.5828e-06	0.479842	1.72899e-06	0.00022604	6.53008e-05	0.000169162	3.32118e-06	0.00140889
FNIP1;686;	8.70229e-05	0.926218	0.000445112	3.08467e-05	0.00116605	0.00700631	0.00238216	0.00308776	0.0219943	1.79136e-05	0.031815	1.34002e-05	0.000306634	0.000780391	0.00292563	1.66337e-05	0.00170635
EPB4;721;	3.58496e-06	0.985659	2.03822e-05	1.42536e-06	3.86306e-05	0.000121638	0.000115908	3.18314e-05	0.00105741	1.26334e-06	0.0124748	1.37813e-06	7.68297e-05	0.000186417	3.60047e-05	2.43903e-06	0.000171235
NFAT3;259;	0.000426779	0.460306	0.299028	0.00078138	0.0101761	0.0108982	0.00712071	0.0214284	0.0133538	0.00112703	0.0168516	0.000599611	0.00234467	0.13479	0.0150281	0.00058202	0.0051577
ECM2;185;	0.00536275	9.82001e-05	0.00894326	0.972799	0.00296409	0.000891699	0.000667149	0.00246727	0.000209742	0.00141474	7.32109e-05	0.000262514	0.000268585	0.00012876	0.00280375	0.000237067	0.000408091
KIAA0324;1473;	0.000203741	0.00102696	0.00835841	0.00197523	0.000194968	0.000160784	0.00013849	0.00064037	0.000183497	0.414647	0.000556083	0.194146	0.000558695	0.358344	0.000232061	0.0184734	0.000159765
IRS1;302;	0.000325775	0.754195	0.00252821	0.000139618	0.0046931	0.0319621	0.0103394	0.0551164	0.0636381	7.7909e-05	0.0471281	4.98559e-05	0.000785123	0.00254764	0.0191839	5.20953e-05	0.00723736
ABHD15;146;	4.47262e-05	0.161542	6.49697e-05	7.13463e-06	0.000855298	0.00369448	0.00678571	0.000124897	0.368502	3.04319e-06	0.439392	3.59676e-06	0.00173725	9.22271e-05	0.000377199	8.86299e-06	0.016764
C1GALT1;69;	0.300716	0.00174176	0.0221878	0.34696	0.150624	0.0256879	0.0388495	0.00982895	0.00960277	0.0032775	0.00228195	0.00176028	0.0200783	0.000929086	0.0343748	0.0039859	0.0271137
KIF5B;945;	2.41689e-06	0.851028	9.24917e-06	6.00622e-07	5.61737e-05	0.000231592	0.000407315	1.94126e-05	0.0208253	3.62408e-07	0.126343	4.08873e-07	9.10116e-05	2.18785e-05	3.49287e-05	8.55139e-07	0.000926994
ALAD;214;	0.000109142	0.00110482	0.0018213	0.000562665	8.78578e-05	9.98125e-05	7.48383e-05	0.000614334	0.00013345	0.0784851	0.000607716	0.0435094	0.000239958	0.868839	0.000141618	0.00348416	8.45437e-05
PIK3R4;853;	0.000119352	0.000653376	0.00085845	0.000382244	8.32108e-05	7.00717e-05	9.12209e-05	0.000115547	0.000143276	0.0159113	0.000815866	0.34488	0.00181855	0.128287	6.18276e-05	0.505548	0.00016019
TOM1;400;	1.7499e-05	0.016985	1.09168e-05	1.97946e-06	0.000243268	0.00103147	0.00251817	3.58031e-05	0.486029	8.21119e-07	0.48684	9.99195e-07	0.000566895	1.80022e-05	0.000102587	2.51539e-06	0.00559478
SH3D19;388;	0.128986	0.000290947	0.00123804	0.826266	0.00110978	0.00095102	0.000774197	0.00335415	0.000552193	0.0203086	0.000483353	0.00719803	0.00145771	0.000602735	0.00142816	0.00422323	0.000775807
RHBDF2;60;	0.0403592	0.000170614	0.00129182	0.938599	0.00145492	0.00121256	0.000683995	0.00823928	0.000337546	0.00263281	0.000163632	0.000504833	0.000334472	0.000216922	0.00301837	0.000313307	0.000466288
FYCO1;416;	0.000938392	0.0467042	0.145373	0.00248326	0.00297839	0.00339411	0.00309198	0.0135097	0.0057012	0.0142889	0.018875	0.0114494	0.00561147	0.710769	0.00405046	0.00657628	0.00420493
KIAA1741;911;	0.999962	1.87733e-07	2.02937e-07	1.50255e-05	4.21302e-06	3.85028e-06	3.27091e-06	1.36596e-06	1.54883e-06	1.64851e-07	4.48611e-07	1.10602e-07	1.83014e-06	6.13469e-08	2.90781e-06	2.09212e-07	2.39483e-06
ARHGAP7;440;	2.38834e-06	0.0103729	4.20785e-06	5.80262e-07	1.11391e-05	2.90614e-05	5.74545e-05	6.62457e-06	0.000939801	5.88936e-07	0.988085	9.95677e-07	0.000233691	4.45959e-05	6.94399e-06	2.51879e-06	0.000201026
KIAA1272;486;	0.000240606	0.830417	0.000435206	6.2608e-05	0.00257293	0.0234904	0.00691289	0.00981822	0.062162	2.90304e-05	0.0503462	2.0643e-05	0.000554042	0.000941892	0.00772049	2.56678e-05	0.00424979
LMO7;1516;	1.42583e-05	0.421299	3.28601e-05	3.55371e-06	0.000171144	0.000483973	0.000806001	6.32274e-05	0.0199014	2.55375e-06	0.554848	3.21448e-06	0.000577221	0.00015295	0.000102657	7.21418e-06	0.00153135
IRS2;401;	1.24292e-05	0.741391	7.09597e-05	3.10161e-06	0.000655899	0.00316552	0.00468864	0.000116536	0.193914	1.39749e-06	0.0476286	1.3888e-06	0.000311398	5.84005e-05	0.000354278	2.85941e-06	0.00762417
NDR1;342;	2.25331e-05	0.0126943	3.0591e-05	3.16656e-06	0.000778022	0.00185449	0.0104016	3.40894e-05	0.813117	1.14072e-06	0.0954836	1.45397e-06	0.002758	2.35266e-05	0.000151253	4.50951e-06	0.0626402
NF2;10;	2.07526e-05	0.0405307	1.86587e-05	3.04058e-06	0.000142541	0.000693129	0.000909829	7.34976e-05	0.0414345	1.70497e-06	0.913704	2.08893e-06	0.000407293	5.18723e-05	0.000110902	4.33533e-06	0.00189089
ACDP4;661;	0.000195569	0.463917	0.000430319	8.42872e-05	0.000461199	0.00111552	0.00102877	0.000990784	0.00746725	0.00016789	0.487478	0.000243009	0.0025681	0.0314612	0.000548747	0.000340743	0.00150183
DOC4;251;	4.46802e-07	0.993364	2.47776e-06	1.55431e-07	6.24671e-06	2.32672e-05	2.04762e-05	6.73592e-06	0.000396803	1.33527e-07	0.00612649	1.36443e-07	6.73892e-06	1.33806e-05	7.07303e-06	2.17539e-07	2.51159e-05
AF013969;655;	6.40712e-05	4.77067e-06	1.16677e-05	7.07218e-06	0.966223	0.0164428	0.00639467	5.81814e-05	0.000148336	1.80156e-07	3.39629e-06	9.17625e-08	6.04647e-06	3.12703e-07	0.0102908	1.65535e-07	0.000344915
SOS1;1183;	1.35053e-05	0.00606847	1.6225e-05	1.80431e-06	0.00102255	0.00514446	0.0217738	3.15551e-05	0.900411	4.57207e-07	0.00589934	4.70117e-07	0.00040217	8.21569e-06	0.000208496	1.2159e-06	0.058996
KIAA1432;1016;	7.38225e-06	0.0111818	6.84429e-06	1.69002e-06	1.72775e-05	4.46861e-05	6.7033e-05	1.42565e-05	0.000845009	2.03694e-06	0.987057	3.76857e-06	0.000406036	0.000153782	1.28579e-05	9.10065e-06	0.000169407
TNS1;1054;	1.57853e-07	7.39013e-05	1.38168e-07	1.77785e-08	7.56652e-06	3.82481e-05	0.000220596	4.15128e-07	0.99853	5.36516e-09	0.000387492	5.83353e-09	4.79717e-06	9.0059e-08	1.96996e-06	1.46408e-08	0.000734088
NDR3;333;	3.25162e-06	0.965337	1.12159e-05	7.87505e-07	0.000100206	0.000741081	0.000526174	5.74855e-05	0.020876	3.83476e-07	0.0117065	3.42086e-07	3.26014e-05	1.76859e-05	0.000111504	5.77834e-07	0.000477568
FARP1;20;	3.05336e-05	0.00309439	0.0250956	0.000128228	0.000157266	0.000132291	0.00012267	0.000408294	0.000189748	0.00122449	0.000555723	0.000783541	0.000239897	0.967048	0.000174861	0.000473434	0.000140931
AHCTF1;1381;	0.00110614	3.79498e-05	7.62571e-05	0.000112253	0.0886384	0.0798203	0.0054811	0.00380827	0.000574671	2.31587e-06	2.37605e-05	9.34812e-07	2.16565e-05	3.13845e-06	0.819794	1.25773e-06	0.000497603
JNKK1;78;	1.35381e-08	1.63009e-06	8.78246e-09	1.25888e-09	1.44887e-06	1.14729e-05	0.00012975	3.1354e-08	0.999573	2.73268e-10	3.51825e-06	2.68347e-10	2.23513e-07	3.43659e-09	2.50841e-07	6.62958e-10	0.000278387
BAT2;1217;	0.000233789	0.0159063	0.0166653	0.000847007	0.000651253	0.000940057	0.000540886	0.0096994	0.000891656	0.00524527	0.00228605	0.00171047	0.000487505	0.94123	0.00153569	0.000641559	0.000487942
TINF2;333;	0.071706	0.00258012	0.0385753	0.0562436	0.521598	0.0498053	0.0905106	0.0101993	0.017674	0.0014379	0.00287639	0.000822731	0.0203381	0.000866435	0.0611975	0.00194363	0.0516252
CYTSA;69;	0.999421	2.71301e-06	2.89511e-06	0.000348665	3.24589e-05	2.96764e-05	2.73616e-05	2.28357e-05	1.63462e-05	5.3738e-06	6.92009e-06	3.53101e-06	2.40189e-05	1.30218e-06	2.74309e-05	5.74185e-06	2.16627e-05
PDLIM2;127;	0.00012825	0.305798	0.000246791	3.36465e-05	0.00111889	0.00232697	0.00592906	0.00029174	0.0505433	2.40135e-05	0.596639	3.49451e-05	0.0155059	0.00144038	0.000473104	0.000101878	0.0193636
AF6;216;	1.82113e-05	0.973429	8.48063e-05	7.38782e-06	0.000131138	0.000632179	0.000306485	0.000658115	0.00289991	7.04964e-06	0.0204436	5.79469e-06	8.70517e-05	0.000695742	0.000302527	6.54182e-06	0.000284468
ABLIM1;350;	0.000693167	0.325142	0.151584	0.000980695	0.022747	0.0579116	0.015845	0.256704	0.021303	0.000504437	0.00985458	0.000207071	0.00128418	0.0175027	0.109462	0.00018407	0.00808993
INPPL1;987;	3.9198e-06	0.0422978	4.86919e-06	6.09704e-07	5.94349e-05	0.000268095	0.000524139	1.44918e-05	0.0807438	3.11278e-07	0.874679	3.76879e-07	0.000140607	1.0673e-05	3.21048e-05	8.71115e-07	0.00121938
MYCBP2;1621;	0.00596693	8.10673e-05	0.000323929	0.000626362	0.712075	0.0723962	0.0206053	0.0023088	0.00135638	8.39053e-06	6.24301e-05	3.70031e-06	0.000120632	8.95929e-06	0.181616	5.94998e-06	0.00243398
ABCA1;1145;	2.66299e-05	0.0639685	9.72357e-05	8.74028e-06	0.000196203	0.000305767	0.000868967	6.38919e-05	0.00890625	9.87457e-06	0.913953	1.83465e-05	0.00721697	0.000782527	8.30745e-05	5.93624e-05	0.00343454
PRKCBP1;489;	0.0200811	0.00160543	0.00130891	0.00300455	0.00395681	0.00234513	0.00686824	0.000615399	0.00723632	0.000952454	0.0099226	0.00270651	0.885377	0.000982564	0.00104859	0.0303346	0.0216534
FISH;1032;	0.103318	0.00132329	0.000746566	0.00225577	0.39519	0.198029	0.153461	0.00457305	0.0302078	7.2578e-05	0.00173445	4.56302e-05	0.00352716	0.000108896	0.0726611	9.61496e-05	0.0326497
BOK;7;	2.08332e-05	3.11341e-06	6.36148e-05	0.00200417	4.16436e-06	2.70982e-06	2.32524e-06	1.27306e-05	1.97237e-06	0.989219	2.90263e-06	0.00815775	7.51881e-06	5.13783e-05	4.84092e-06	0.000438354	2.40238e-06
DCAMKL1;353;	0.000646866	0.00994016	0.68392	0.00372456	0.00268462	0.00170462	0.00194388	0.00306029	0.00202163	0.0167962	0.00373695	0.0134471	0.00605937	0.232025	0.00203001	0.0135231	0.00273585
RP23-22A15.9-001;702;	0.000154466	0.00145144	5.24781e-05	1.4876e-05	0.00182866	0.00340232	0.0313646	7.03676e-05	0.0523808	3.12181e-06	0.00587196	3.94015e-06	0.017422	2.95538e-05	0.000283219	1.39121e-05	0.885652
PDE3B;545;	3.87906e-05	0.211569	7.02096e-05	7.15517e-06	0.0018686	0.00921273	0.0130293	0.000247485	0.696291	2.64885e-06	0.0550248	2.51153e-06	0.000534822	7.03596e-05	0.0009476	5.21456e-06	0.0110774
GPBP1L1;76;	0.571944	0.000370154	0.000489486	0.00357332	0.136382	0.104976	0.0430123	0.00955482	0.00802352	5.54322e-05	0.000526883	2.8033e-05	0.000856613	4.55388e-05	0.110851	4.47322e-05	0.00926694
LL5B;414;	0.000143764	0.792966	0.0687699	0.000136058	0.0140615	0.0148977	0.0177455	0.0037894	0.0350128	9.04544e-05	0.0175112	6.84301e-05	0.00252765	0.00640506	0.00810868	0.000113569	0.0176523
BAD;136;	1.35191e-06	0.862656	4.48253e-06	3.31773e-07	2.36366e-05	9.35904e-05	0.000123065	9.70116e-06	0.00566203	2.21297e-07	0.131144	2.53759e-07	4.01687e-05	1.44709e-05	1.68062e-05	5.1538e-07	0.000209094
BAT2D;775;	0.000562079	3.60892e-05	8.33041e-05	6.81544e-05	0.624925	0.0800417	0.0131169	0.00118135	0.000814944	1.71659e-06	2.4246e-05	7.74632e-07	2.77221e-05	2.59954e-06	0.278213	1.19268e-06	0.000899509
KIAA1272;765;	0.000137947	0.84406	0.0109935	0.000113304	0.0030215	0.00363085	0.00512211	0.00199372	0.0217521	0.00015682	0.0745935	0.000162467	0.00370157	0.0211124	0.00209822	0.000269686	0.00708043
GOLGA4;40;	0.000788886	0.0970244	0.00159324	0.000352873	0.00109635	0.00167243	0.00218992	0.000981716	0.0117193	0.000918773	0.768082	0.00272103	0.0369349	0.0612721	0.000807541	0.00720213	0.00464275
EIF4B;497;	0.990598	3.27579e-05	4.4685e-05	0.00155496	0.00179162	0.00155042	0.000967137	0.000638987	0.000362067	1.67043e-05	6.02518e-05	8.6812e-06	0.000129571	7.57e-06	0.00178041	1.3092e-05	0.000443094
KIAA0589;554;	5.18046e-05	0.0002656	0.000430513	0.000224134	3.11704e-05	2.87393e-05	3.01498e-05	7.96363e-05	5.0047e-05	0.044779	0.000272796	0.770839	0.000288885	0.133354	3.10888e-05	0.0492001	4.34855e-05
KIAA1457;853;	0.00626765	0.000223925	0.00456518	0.929468	0.00125861	0.000572898	0.000494777	0.00208406	0.000279369	0.0430805	0.000199941	0.00544578	0.000641523	0.000756533	0.00126446	0.00301308	0.00038369
IBTK;1005;	0.000356216	0.000792157	6.754e-05	2.0573e-05	0.0197544	0.146047	0.286693	0.000694593	0.445999	2.52817e-06	0.00167073	2.00436e-06	0.000419012	1.17989e-05	0.00696579	3.96338e-06	0.0905006
CABIN1;2121;	1.99586e-05	0.00270677	2.66373e-05	2.74087e-06	0.00170871	0.00224549	0.03619	2.30458e-05	0.615663	7.6572e-07	0.00841546	9.17875e-07	0.00286239	1.14027e-05	0.000149949	3.09936e-06	0.32997
GAB1;388;	2.62226e-05	0.36809	8.45167e-05	5.87108e-06	0.00170916	0.0109773	0.0110999	0.000425023	0.568539	2.29041e-06	0.0299934	1.96026e-06	0.00024558	6.61593e-05	0.00133739	3.51322e-06	0.00739301
GSK3A;21;	4.85838e-06	0.985264	0.000150887	3.80391e-06	4.55549e-05	0.000100621	8.78241e-05	0.000105369	0.000530288	7.16125e-06	0.00805784	7.40553e-06	8.04855e-05	0.00536543	5.83985e-05	9.12023e-06	0.000120505
EIF4B;230;	1.23098e-06	0.000192561	7.60386e-07	1.19932e-07	0.000169449	0.00320624	0.00506481	4.99647e-06	0.989732	2.40387e-08	0.000142729	2.05501e-08	6.84624e-06	3.01386e-07	5.24888e-05	4.3666e-08	0.00142569
D7ERTD458E;393;	0.84876	6.08669e-05	0.000205814	0.145525	0.000821346	0.000495117	0.000419533	0.000624566	0.000217938	0.000602374	0.000107161	0.000273143	0.00046031	5.49033e-05	0.00069766	0.000361163	0.000312653
ASK1;1036;	1.02386e-05	0.000468661	0.00042514	2.76103e-05	1.82874e-05	1.7452e-05	2.12782e-05	3.261e-05	4.16349e-05	0.000586016	0.000314675	0.00218693	0.000213492	0.993655	1.55279e-05	0.00192804	3.71084e-05
FAM13A;322;	0.000672609	0.217969	0.000439946	0.00016609	0.00126125	0.00368266	0.00377852	0.00210914	0.0295798	0.000169317	0.719087	0.000222755	0.0063572	0.0069277	0.00139205	0.000365452	0.00581898
KIAA0324;1703;	0.328448	0.000785552	0.00321464	0.0165232	0.325608	0.0709308	0.117022	0.00626197	0.012313	0.000214984	0.00113645	0.000128773	0.00745029	0.000156842	0.0478948	0.000282594	0.0616279
TJP1;1576;	0.999054	5.19699e-06	5.54559e-06	0.000302503	0.000131864	0.000119876	7.79142e-05	5.12787e-05	4.17794e-05	3.94725e-06	1.10504e-05	2.28904e-06	2.6389e-05	1.50806e-06	0.000118756	3.68348e-06	4.2719e-05
BOLA1;23;	6.72868e-06	0.94256	4.1591e-05	2.96993e-06	4.806e-05	0.000123839	0.000122876	4.75179e-05	0.00117137	3.71978e-06	0.0546192	4.72462e-06	0.000174801	0.000822972	4.5329e-05	8.27874e-06	0.000196114
PRKCBP1;484;	0.0520976	0.00279839	0.0022063	0.00818766	0.0051239	0.00344558	0.00787508	0.00123778	0.00973842	0.00321047	0.0179533	0.011065	0.721544	0.00229993	0.00176693	0.12898	0.0204694
MYO18A;72;	0.000907327	0.00421382	0.012533	0.00490716	0.000686978	0.000670402	0.00061783	0.00210284	0.000821725	0.155492	0.00273317	0.171464	0.00312847	0.590589	0.000771543	0.0475343	0.000825369
DRCTNNB1A;433;	0.0166129	2.33315e-05	0.000235435	0.979369	0.000323701	0.000215068	0.00010344	0.00151772	5.35643e-05	0.000509335	2.34991e-05	7.87979e-05	4.16895e-05	2.59131e-05	0.00076424	4.62625e-05	5.60233e-05
CKLFSF4;208;	3.79142e-06	0.000251267	3.1096e-06	3.96046e-07	0.00149244	0.109072	0.0394511	2.87506e-05	0.845626	6.41253e-08	0.000130683	4.84547e-08	1.00375e-05	6.27828e-07	0.000599922	9.25045e-08	0.00332954
BCL2L11;83;	0.00178479	7.3375e-05	8.04945e-05	8.98985e-05	0.76989	0.037141	0.162446	0.000222503	0.00335293	2.87339e-06	8.35837e-05	1.86834e-06	0.000337336	5.1902e-06	0.00687953	4.50231e-06	0.0176039
KIAA0638;524;	0.0830854	0.00468585	0.0416956	0.335799	0.0303532	0.0105962	0.0200017	0.00723562	0.00973595	0.0400117	0.00701385	0.0431185	0.133985	0.00852209	0.0100998	0.184461	0.0295994
DOCK1;1743;	0.000311505	0.526905	0.0334195	0.000203381	0.0339284	0.0747137	0.0549198	0.022839	0.140863	9.36819e-05	0.0271385	6.19474e-05	0.00204324	0.00272912	0.0421154	8.58305e-05	0.0376293
KIAA1272;696;	1.92134e-05	0.0832665	1.43831e-05	2.74737e-06	0.000142271	0.000851973	0.000900923	8.84016e-05	0.0570109	1.44098e-06	0.855861	1.62837e-06	0.000245015	4.48683e-05	0.000131931	3.12676e-06	0.00141371
ERRFI1;72;	0.000202128	0.170632	0.00449204	7.45711e-05	0.0790494	0.135657	0.137436	0.00268416	0.367716	2.18102e-05	0.0156989	1.65475e-05	0.00186943	0.000428939	0.0243515	3.18158e-05	0.0596377
AS160;576;	6.3876e-06	0.00096277	5.95302e-06	7.45955e-07	0.00199317	0.0485541	0.0525495	3.46727e-05	0.887018	1.35585e-07	0.000372415	1.08295e-07	3.03025e-05	1.68054e-06	0.000526509	2.23888e-07	0.00794376
VIM;72;	2.67934e-05	0.000349526	0.00105983	0.000148502	3.07266e-05	2.85239e-05	2.72101e-05	0.000103638	4.34916e-05	0.0176384	0.000196945	0.0285383	0.000142651	0.947745	3.50248e-05	0.00384927	3.6145e-05
KIAA0638;1078;	2.20491e-05	0.568703	0.00017293	6.47858e-06	0.0026835	0.0132884	0.0200766	0.000426049	0.360219	2.49482e-06	0.01532	2.10322e-06	0.000319679	8.78281e-05	0.00151004	3.92883e-06	0.0171552
GAS2L1;493;	0.00157875	0.0407894	0.00338768	0.00184935	0.00102726	0.00186164	0.00134484	0.00568937	0.00352494	0.0122091	0.0310607	0.0155866	0.00469029	0.863923	0.00164124	0.00812373	0.00171166
TRIP11;1422;	0.0658887	0.00140845	0.0048682	0.00650252	0.37025	0.0522803	0.208626	0.00300999	0.0262455	0.000232197	0.00255522	0.00018771	0.0339986	0.000248565	0.0224697	0.000580819	0.200648
CABIN1;2123;	1.85438e-05	0.00281674	2.29553e-05	2.45861e-06	0.00140774	0.00212209	0.0302582	2.13093e-05	0.677283	6.91245e-07	0.00941406	8.31649e-07	0.00256371	1.06004e-05	0.000135732	2.78157e-06	0.273918
AHNAK;5630;	0.000215155	0.00864629	0.00128382	6.99953e-05	0.0219971	0.0182976	0.135625	0.000518738	0.0633655	1.54208e-05	0.00511949	1.49273e-05	0.00910635	0.000188695	0.00261139	4.16859e-05	0.732883
AKT3;476;	5.43809e-05	0.587639	0.000298837	1.48859e-05	0.00482633	0.067213	0.0185015	0.00367752	0.286695	5.09597e-06	0.0131619	3.52863e-06	0.000203072	0.000135959	0.0106587	5.11255e-06	0.00690577
MAP1A;1950;	6.68436e-06	0.00283357	5.55931e-06	9.27315e-07	5.0797e-05	0.000109728	0.000402754	6.55832e-06	0.0150297	5.03679e-07	0.976888	8.39742e-07	0.0021281	1.25515e-05	1.5688e-05	2.97781e-06	0.00250525
MSK1;814;	7.45799e-06	0.00664437	1.47734e-05	1.68957e-06	5.35974e-05	8.34671e-05	0.000309083	9.34733e-06	0.0046223	1.39823e-06	0.979307	2.77277e-06	0.00688061	6.1469e-05	1.69528e-05	1.13638e-05	0.00197216
NDR1;346;	6.09528e-06	0.00293586	3.92996e-06	6.38419e-07	0.00016358	0.000700424	0.00238203	1.08621e-05	0.962413	2.10234e-07	0.0258246	2.41997e-07	0.000198047	3.75518e-06	4.74784e-05	6.37024e-07	0.00530817
KIF13A;1717;	6.60035e-06	0.000956209	2.43522e-06	7.81924e-07	1.68026e-05	3.79226e-05	0.00010831	3.92318e-06	0.00200195	5.07141e-07	0.993943	1.00183e-06	0.00233375	1.24383e-05	6.68195e-06	3.87367e-06	0.000564115
ERK2;185;	3.31944e-05	0.0120202	2.83754e-05	3.94417e-06	0.0005834	0.00288605	0.00564857	0.000104711	0.843651	1.46918e-06	0.123249	1.6269e-06	0.000536157	2.42077e-05	0.000302602	3.59129e-06	0.0109218
CRAF;29;	4.35369e-06	7.79949e-05	2.03142e-06	3.52521e-07	0.000651238	0.00105352	0.0579103	3.42456e-06	0.534092	6.36235e-08	0.000259062	6.74751e-08	0.00014533	5.45452e-07	3.53629e-05	2.06472e-07	0.405765
GAB2;532;	9.03649e-08	4.52452e-06	5.95222e-08	8.37304e-09	1.9366e-05	0.000108737	0.00306882	1.81847e-07	0.992179	1.54208e-09	8.3853e-06	1.46353e-09	1.24601e-06	1.56047e-08	2.01944e-06	3.67105e-09	0.00460734
ECNOS;1176;	4.42064e-05	0.148583	0.00027274	2.17075e-05	0.000184708	0.000306749	0.000498626	0.000164964	0.00404944	4.73619e-05	0.830183	9.81382e-05	0.00355765	0.0104057	0.000129917	0.000221313	0.00123035
IRS1;272;	1.14589e-05	0.0337281	9.48609e-06	1.70655e-06	6.7394e-05	0.00033687	0.000401828	3.65962e-05	0.0172034	9.68526e-07	0.947015	1.21618e-06	0.000235922	3.2659e-05	5.46415e-05	2.53779e-06	0.000860228
AKT3;472;	5.50499e-05	0.595907	0.000851622	1.86804e-05	0.00969685	0.047065	0.0290565	0.00162973	0.278738	6.84977e-06	0.0146678	5.1495e-06	0.000430043	0.000203214	0.00793951	8.6457e-06	0.0137203
IRS2;309;	0.000245995	0.306833	0.0007844	0.000128861	0.000607051	0.00103506	0.00141402	0.000613772	0.00759033	0.000314011	0.548326	0.000682589	0.0136208	0.112827	0.000458746	0.00156481	0.00295424
WDR20A;353;	8.03155e-06	0.00503173	1.06088e-05	1.64603e-06	3.69984e-05	7.00094e-05	0.000162052	9.80152e-06	0.00272699	1.38109e-06	0.989613	2.63646e-06	0.0016471	5.07075e-05	1.6162e-05	8.914e-06	0.000602717
ECNOS;1174;	8.24947e-05	0.801982	0.000109688	1.68841e-05	0.000735349	0.00581135	0.0028691	0.0011366	0.0552256	8.67602e-06	0.127363	7.72187e-06	0.000406961	0.000329812	0.00125493	1.15415e-05	0.00264808
ERK1;203;	1.29669e-05	0.000621387	9.85208e-06	1.38149e-06	0.000931401	0.0021405	0.0172785	2.22076e-05	0.943697	3.32018e-07	0.0024132	3.46155e-07	0.000250628	3.28304e-06	0.000147233	8.99857e-07	0.0324687
FAM13A;320;	0.00216314	0.033711	0.00623744	0.00228639	0.00246563	0.00214708	0.0034914	0.0013669	0.00729153	0.00920128	0.0639111	0.046045	0.162046	0.292507	0.00127979	0.356559	0.0072906
CLIP2;552;	1.54066e-06	0.000155845	7.83391e-07	1.39295e-07	8.67079e-05	0.000266882	0.00277191	1.79732e-06	0.986901	3.44392e-08	0.000791214	3.84364e-08	5.98948e-05	4.39925e-07	1.2087e-05	1.11314e-07	0.00894934
CAV;14;	3.64707e-06	0.0862338	9.5957e-06	9.29336e-07	2.98132e-05	8.8258e-05	0.000118159	1.75815e-05	0.00332215	8.13904e-07	0.909748	1.09532e-06	0.000121758	5.06972e-05	2.26398e-05	2.24646e-06	0.000228898
MCG_23059;96;	1.21029e-05	0.0186312	3.55078e-05	2.19647e-06	0.00149771	0.0125252	0.0108315	0.000145245	0.944925	6.53804e-07	0.00512902	5.48495e-07	8.77596e-05	1.1956e-05	0.000906412	1.02528e-06	0.00525708
RANBP2;1098;	1.21633e-05	0.00453365	2.27401e-05	1.91593e-06	0.00372254	0.223226	0.0536237	0.000238932	0.702578	3.79573e-07	0.000783941	2.74114e-07	3.98108e-05	5.33803e-06	0.00303798	4.80974e-07	0.00817274
IRS1;983;	0.000299948	0.159803	0.00185378	0.00021344	0.000665844	0.000946422	0.00121236	0.000888421	0.0061016	0.000965906	0.378477	0.00260266	0.0116974	0.426704	0.000553912	0.00474883	0.00226589
USP24;1369;	2.85096e-05	0.00263952	6.76861e-05	4.67071e-06	0.00885702	0.00817544	0.140979	4.75269e-05	0.498232	1.06644e-06	0.00293782	1.09785e-06	0.00140099	1.33219e-05	0.000481925	3.28924e-06	0.336129
ATRX;1232;	0.000771227	0.00882004	0.00198552	0.000982523	0.000462516	0.00051075	0.000632369	0.000883929	0.00167693	0.0203937	0.0241724	0.238725	0.0110499	0.4419	0.000408481	0.245519	0.00110586
AKT2;458;	0.000105069	0.314701	0.000387402	2.57537e-05	0.0129348	0.0869384	0.047125	0.00158279	0.489752	7.52311e-06	0.0177652	5.74819e-06	0.000613701	0.000171854	0.00962393	1.02229e-05	0.0182506
TRIO;2462;	5.3249e-06	0.000181011	5.24066e-06	6.18057e-07	0.000672449	0.000789987	0.0311371	5.85114e-06	0.242062	1.35926e-07	0.000618763	1.51767e-07	0.000365608	1.34729e-06	4.47592e-05	4.77972e-07	0.72411
EEPD1;25;	4.69793e-05	7.1096e-06	0.000118919	0.00400606	9.36873e-06	6.04249e-06	5.21238e-06	2.60974e-05	4.38086e-06	0.98032	6.45468e-06	0.0142851	1.72843e-05	0.00011969	1.05331e-05	0.00100506	5.29745e-06
IRS1;478;	1.35467e-05	0.00247148	0.000146164	1.86653e-05	2.35767e-05	2.98206e-05	3.27227e-05	4.4435e-05	9.62608e-05	0.000176499	0.00162123	0.000479998	0.000279761	0.993935	2.22511e-05	0.000555509	5.32004e-05
ERK1;205;	1.5311e-06	0.000754616	2.07782e-06	2.01177e-07	9.56018e-05	0.000438082	0.001718	4.91744e-06	0.99096	6.03992e-08	0.00213059	6.33817e-08	3.71832e-05	9.93345e-07	2.60569e-05	1.52663e-07	0.00382988
TPR;2223;	2.6687e-05	0.00214053	4.11129e-05	4.03864e-06	0.00197804	0.00299522	0.046561	5.39015e-05	0.542111	1.13821e-06	0.00666619	1.26493e-06	0.00149545	1.40167e-05	0.000263349	3.5919e-06	0.395643
CAV;15;	9.60869e-05	0.106192	0.000120274	1.64609e-05	0.00105765	0.00334627	0.00971701	0.000172469	0.172045	7.58157e-06	0.635744	1.03717e-05	0.0113108	0.000247233	0.000398016	3.00179e-05	0.0594886
FISH;794;	0.862939	0.000272083	0.000523275	0.0157789	0.0370453	0.0252361	0.011751	0.00625737	0.00227468	9.96185e-05	0.00029071	4.35153e-05	0.000761643	6.01929e-05	0.0326858	6.67071e-05	0.00391424
TPR;2205;	1.88509e-05	0.0062464	1.35717e-05	2.18147e-06	0.000274521	0.000700838	0.00416908	2.06908e-05	0.447394	8.78685e-07	0.494245	1.26128e-06	0.00406204	1.7476e-05	6.58036e-05	4.16893e-06	0.0427629
ERK2;183;	0.000694486	0.00883049	0.000354818	7.02695e-05	0.0080196	0.0172185	0.0616497	0.000787897	0.627829	1.97033e-05	0.0733725	2.29161e-05	0.0108166	0.000148475	0.00253303	5.83007e-05	0.187574
BRWD1;1889;	0.051422	0.000396691	0.00447321	0.0324963	0.322911	0.0661431	0.0208411	0.0322916	0.00261217	0.000159568	0.000259191	5.09439e-05	0.000540388	9.33547e-05	0.46075	6.50302e-05	0.00449414
NDR3;334;	0.000410954	0.183624	0.00032331	6.72249e-05	0.00201982	0.00846075	0.00849514	0.000963175	0.120772	3.2652e-05	0.650649	3.92035e-05	0.00576576	0.000818824	0.00162156	8.17613e-05	0.015855
CASL;316;	0.00440817	0.000358484	0.0125803	0.74961	0.00134794	0.000618884	0.000589764	0.00193679	0.000348899	0.187755	0.000303558	0.0233747	0.00121774	0.0020347	0.00118586	0.0117817	0.000548204
EIF4EBP1;10;	1.33914e-05	0.000833428	3.92728e-06	1.01641e-06	0.000228162	0.000713725	0.00670531	1.05377e-05	0.911311	2.84334e-07	0.016075	3.58112e-07	0.000983477	3.64847e-06	4.42058e-05	1.11741e-06	0.0630716
IRS1;135;	0.000218628	0.176024	0.496093	0.000529158	0.00350681	0.0037367	0.00264291	0.0104339	0.00484833	0.00116547	0.00854292	0.000628207	0.00140244	0.282067	0.00525291	0.000524954	0.00238252
BRWD1;1890;	0.047945	0.000471284	0.00428091	0.0256169	0.35471	0.0851047	0.0289721	0.0314002	0.00317294	0.00015179	0.000300392	5.13114e-05	0.000668031	0.000104211	0.410545	6.83784e-05	0.00643713
MPP1;331;	0.000271897	0.00774338	0.000261438	3.93751e-05	0.0712062	0.34545	0.157347	0.00238437	0.354925	6.69316e-06	0.00340892	4.54253e-06	0.000423656	5.25662e-05	0.0378172	8.01344e-06	0.0186507
IRS2;308;	8.16511e-06	0.0425184	3.28868e-05	2.99434e-06	3.49975e-05	6.94598e-05	0.000108588	2.61738e-05	0.00125565	4.82681e-06	0.954291	9.31835e-06	0.00065876	0.000651828	2.43647e-05	2.1953e-05	0.000280135
DENND1B;633;	7.21066e-06	0.242389	1.3885e-05	1.33136e-06	0.00013887	0.00059474	0.000978513	3.49281e-05	0.0992613	7.1737e-07	0.654434	8.32455e-07	0.000226298	2.89258e-05	7.93362e-05	1.84107e-06	0.00180791
RANBP3;56;	0.000174654	0.0155825	0.000190216	3.18714e-05	0.00147139	0.00145797	0.00817855	9.98144e-05	0.065726	1.7845e-05	0.388369	3.45485e-05	0.459229	0.000344189	0.000272159	0.000184538	0.0586355
WDR20A;347;	6.88794e-06	0.0214468	2.31179e-05	1.29282e-06	0.000701854	0.00426305	0.0103027	4.50783e-05	0.937796	4.07685e-07	0.00717314	3.92187e-07	0.000150528	9.6726e-06	0.000238596	8.65221e-07	0.0178399
TRIO;2458;	3.99586e-06	0.00013409	4.6626e-06	4.99729e-07	0.000670322	0.00065504	0.0308815	4.4327e-06	0.123865	1.0614e-07	0.000368436	1.17095e-07	0.000291999	1.04831e-06	3.68396e-05	3.73463e-07	0.843082
CASL;344;	0.090246	0.00194442	0.0349956	0.718504	0.0135478	0.00682666	0.00663733	0.0113836	0.00375926	0.0403366	0.00250869	0.0177313	0.0112831	0.00346743	0.0104087	0.019941	0.00647803
SNX2;117;	1.79083e-06	0.00471976	4.69166e-06	3.16256e-07	0.000201812	0.000811895	0.00308019	1.00954e-05	0.984329	1.06128e-07	0.00281956	1.04554e-07	4.37328e-05	2.35259e-06	5.43207e-05	2.40146e-07	0.00392015
RANBP3;60;	3.35047e-05	0.0558153	6.98574e-05	6.45364e-06	0.000769456	0.00170808	0.00663515	9.55243e-05	0.355518	3.27702e-06	0.551278	4.24031e-06	0.00281265	8.95564e-05	0.00024819	1.14806e-05	0.0249005
DEPDC5;1295;	0.000543896	0.0436729	0.000882708	0.000169537	0.00132378	0.00187522	0.00458241	0.000755459	0.026266	0.000237341	0.822925	0.000548642	0.0709585	0.00674064	0.000687343	0.001768	0.0160624
IRS1;525;	6.34397e-05	0.717065	0.000150332	1.3556e-05	0.00137411	0.00883222	0.00843176	0.000480605	0.151847	5.80669e-06	0.0972449	5.66362e-06	0.000927841	0.000226603	0.00107324	1.09815e-05	0.0122477
SOLO;994;	8.54299e-06	0.00147268	6.2398e-06	9.10417e-07	0.00020405	0.000708201	0.00397852	1.40482e-05	0.943994	2.94837e-07	0.023875	3.57326e-07	0.000422221	4.36156e-06	5.35074e-05	9.76297e-07	0.025256
ADAM17;788;	2.46341e-06	0.000156384	2.87469e-06	2.99786e-07	0.000547153	0.000864618	0.036668	4.06034e-06	0.742465	6.52439e-08	0.000336832	6.75704e-08	9.74883e-05	7.18872e-07	3.67909e-05	1.93682e-07	0.218817
RANBP3;58;	1.9937e-05	0.0695798	2.87537e-05	3.05904e-06	0.000365124	0.00199436	0.00351333	8.64754e-05	0.48053	1.34051e-06	0.434287	1.52523e-06	0.000515301	3.64529e-05	0.00021023	3.3442e-06	0.00882437
ADAM17;807;	3.77561e-06	0.000148398	3.7425e-06	4.39961e-07	0.000657379	0.000827174	0.041749	4.76844e-06	0.347233	9.33341e-08	0.000402987	1.001e-07	0.000196022	9.42585e-07	4.03485e-05	3.03369e-07	0.608731
CHCHD6;33;	0.00804689	0.00104243	0.324545	0.585495	0.0218925	0.00528191	0.00439235	0.0108838	0.00143806	0.0104518	0.000557927	0.00200538	0.00206293	0.00178947	0.0153534	0.00200777	0.00275325
PLVAP;4;	0.990449	2.28139e-05	3.14007e-05	0.00795085	0.000155118	0.000147583	0.000127311	0.000186744	8.53954e-05	0.000128476	5.30466e-05	8.02485e-05	0.000187877	1.81868e-05	0.00015375	0.000108156	0.000113814
IRS1;307;	0.000196353	0.0132541	0.000383707	5.7817e-05	0.000724329	0.000818252	0.00294244	0.000124951	0.0118547	4.87963e-05	0.169139	0.000123811	0.775169	0.00135109	0.000209669	0.000768513	0.0228335
BOK;8;	5.79534e-06	9.51459e-07	1.72404e-05	0.000541681	1.15322e-06	7.94757e-07	6.52269e-07	4.48817e-06	5.66827e-07	0.997181	8.48759e-07	0.00213368	1.87808e-06	1.73241e-05	1.47461e-06	9.00294e-05	6.54966e-07
BSAC;6;	7.64534e-07	1.59972e-05	3.71735e-07	6.49749e-08	0.000102449	0.00017642	0.0136906	5.84403e-07	0.084038	1.16758e-08	5.12709e-05	1.26572e-08	3.83021e-05	1.0732e-07	5.60379e-06	3.99784e-08	0.901879
NDR1;366;	3.75232e-05	0.0542687	8.43934e-05	7.13662e-06	0.00353424	0.0176163	0.0245597	0.000278856	0.866841	2.14763e-06	0.0151107	1.89224e-06	0.00038356	4.22336e-05	0.00155419	3.83625e-06	0.0156737
MTMR14;528;	3.34963e-07	2.91559e-05	3.8776e-07	3.92034e-08	0.000126982	0.00140202	0.00927644	1.79463e-06	0.986906	7.42456e-09	2.5216e-05	6.23538e-09	2.20869e-06	7.83817e-08	2.31923e-05	1.32828e-08	0.00220594
KIAA1248;348;	1.579e-05	0.107015	1.93768e-05	2.42769e-06	0.000205105	0.00124429	0.00162159	8.67683e-05	0.174818	1.20607e-06	0.711529	1.34388e-06	0.00027823	3.77002e-05	0.000158817	2.6923e-06	0.00296307
BAT2D;901;	0.000314174	0.0111978	0.000964148	6.39827e-05	0.0877959	0.352444	0.123038	0.00560778	0.311205	1.19918e-05	0.00474621	7.8988e-06	0.000526772	9.09888e-05	0.0795413	1.27519e-05	0.0224311
KIAA0638;491;	4.06516e-06	0.000194521	6.40368e-05	1.03182e-05	4.87571e-06	6.14965e-06	5.16185e-06	2.2643e-05	1.20661e-05	0.000331577	0.000100099	0.000511673	2.18612e-05	0.998556	6.70963e-06	0.000141489	6.58472e-06
D13WSU64E;629;	2.5354e-05	0.00738964	2.383e-05	3.57336e-06	0.000269376	0.000496609	0.00236096	2.708e-05	0.0923086	1.83612e-06	0.874569	2.91713e-06	0.00731462	3.89533e-05	7.06142e-05	1.02791e-05	0.0150868
EIF4EBP2;2;	1.15743e-05	0.000403935	8.12126e-06	1.27369e-06	0.00736572	0.816918	0.0623114	9.91304e-05	0.106262	1.73328e-07	0.00014095	1.18863e-07	1.73971e-05	1.4983e-06	0.00355947	2.16714e-07	0.00289888
PPFIA1;554;	9.90362e-05	0.19938	0.00112336	8.0214e-05	0.000310437	0.000476632	0.00057646	0.000426292	0.00263983	0.000315589	0.119396	0.000669457	0.00407351	0.667931	0.000266378	0.00115168	0.00108296
KIAA1248;350;	2.63478e-05	0.0232679	2.26103e-05	3.14661e-06	0.000495523	0.00348347	0.00513696	9.70181e-05	0.846378	1.13728e-06	0.111647	1.21125e-06	0.000379462	2.26778e-05	0.000291164	2.59983e-06	0.00874454
CDKL5;407;	7.16819e-06	7.17855e-05	2.19298e-06	4.65039e-07	0.000861834	0.00317096	0.06049	6.63189e-06	0.854619	7.25842e-08	0.000223231	7.05466e-08	6.70808e-05	5.22425e-07	7.80234e-05	1.85616e-07	0.0804003
MCG_5513;333;	9.71152e-06	0.645768	4.87833e-05	3.04769e-06	9.55572e-05	0.000338697	0.000410452	9.23263e-05	0.00767191	2.7399e-06	0.344088	3.30865e-06	0.000264038	0.000239672	8.91114e-05	5.89209e-06	0.000868026
DMN;1049;	3.17881e-05	0.0011893	1.06426e-05	2.4902e-06	0.000847283	0.00182639	0.0166374	1.9503e-05	0.876728	6.13552e-07	0.0120114	7.56898e-07	0.00212706	6.67388e-06	0.000114861	2.48094e-06	0.0884429
PXN;119;	0.102331	0.000332643	0.00313083	0.847618	0.0113332	0.00511311	0.00330253	0.00869818	0.000937185	0.0013078	0.000272998	0.000346961	0.000935546	0.000256607	0.0119483	0.000386607	0.00174855
PHF3;655;	7.04065e-05	0.00312357	3.60315e-05	6.97822e-06	0.00102991	0.00174874	0.0179793	4.74206e-05	0.52438	2.31855e-06	0.0910935	3.35061e-06	0.0197452	2.83725e-05	0.000171754	1.22366e-05	0.340521
CDC42BPA;1545;	6.60848e-06	0.465239	3.22623e-05	2.36949e-06	5.78089e-05	0.000136798	0.000245406	3.60169e-05	0.00340161	2.63273e-06	0.529259	3.85787e-06	0.000488026	0.000374894	3.78452e-05	8.56876e-06	0.000667199
ERBB2IP;829;	0.00390336	0.0926475	0.0884597	0.00326544	0.114965	0.222418	0.0655703	0.0768376	0.0539985	0.000657893	0.0141866	0.000335698	0.00527861	0.00613291	0.216914	0.000428919	0.033999
ERK3;687;	9.5478e-06	0.000455426	6.80922e-06	9.97815e-07	0.00158258	0.0028836	0.0402521	1.3642e-05	0.915608	2.0927e-07	0.000945083	2.09039e-07	0.000189351	2.12067e-06	0.000134594	5.73305e-07	0.0379156
ARHGEF11;1324;	2.54476e-05	3.75162e-06	2.79414e-05	0.000645251	3.21873e-06	2.57375e-06	2.29592e-06	1.31112e-05	2.39385e-06	0.933299	4.72654e-06	0.0649767	9.76482e-06	6.59909e-05	3.99994e-06	0.000910926	2.64708e-06
CAV;25;	4.27601e-05	0.00395659	7.07587e-05	6.24384e-06	0.00318108	0.0113643	0.033816	0.000202208	0.899031	1.64663e-06	0.00727431	1.53745e-06	0.000419844	1.81116e-05	0.00105911	3.26292e-06	0.0395509
TILZ2;167;	1.90641e-05	0.000601052	0.00028689	4.56781e-05	2.21316e-05	2.29456e-05	2.48491e-05	5.10426e-05	5.6466e-05	0.00164849	0.000547035	0.00848513	0.000231833	0.983849	2.1698e-05	0.00404829	3.82515e-05
PERI;410;	0.000444022	2.57535e-05	0.000299175	0.0433545	4.38097e-05	2.83226e-05	2.58454e-05	0.000103591	2.09344e-05	0.887391	2.93557e-05	0.0611573	0.000101061	0.000273184	4.56656e-05	0.00662873	2.75524e-05
BCAR1;253;	0.000894057	4.17754e-05	0.00353372	0.983099	0.00027788	0.00013138	9.56119e-05	0.000719972	4.79181e-05	0.00942428	3.03727e-05	0.000717901	8.81102e-05	0.000149377	0.000359808	0.000314953	7.34121e-05
ZC3HAV1;344;	3.76321e-06	0.00147604	5.83106e-06	5.46403e-07	0.000463541	0.00252741	0.00584574	2.44602e-05	0.985153	1.49781e-07	0.00126209	1.33031e-07	3.33278e-05	2.15665e-06	0.00016109	2.75153e-07	0.00304035
RP23-306D20.10-001;2305;	0.000159682	0.00136256	0.00462151	0.000960867	0.000158742	0.000142259	0.00012811	0.000521603	0.000204676	0.122379	0.000843096	0.154325	0.000610909	0.695233	0.000186852	0.0180057	0.000157727
RPS6KA1;369;	0.000265099	0.0143146	0.000277042	3.83423e-05	0.0115302	0.0413514	0.0558068	0.0016211	0.812788	1.00849e-05	0.021775	8.57625e-06	0.00105844	9.26643e-05	0.00690734	1.58941e-05	0.0321394
FRS2;137;	9.79757e-05	0.00102249	1.72772e-05	5.78666e-06	0.000882635	0.00182159	0.021323	3.49307e-05	0.444677	1.46083e-06	0.0265559	2.02815e-06	0.0138837	1.27658e-05	0.000141025	7.34333e-06	0.489513
MAST4;1368;	0.000585957	3.78152e-05	0.000914059	0.188595	8.85814e-05	5.27593e-05	4.37049e-05	0.000267889	3.14e-05	0.79076	3.48566e-05	0.0157093	9.94946e-05	0.000339142	0.000105751	0.00229351	4.08252e-05
KIF13B;1810;	2.43218e-06	0.00331494	2.48566e-06	3.02181e-07	9.42048e-05	0.000595309	0.00123312	9.07416e-06	0.983859	1.01402e-07	0.0091392	1.05189e-07	4.22115e-05	2.00479e-06	3.9059e-05	2.37465e-07	0.00166634
IRS1;300;	0.000233166	0.103496	9.38521e-05	2.47943e-05	0.00180545	0.0200317	0.0143294	0.00128727	0.605723	8.56562e-06	0.233382	8.15828e-06	0.0010765	0.000159273	0.0021745	1.43728e-05	0.0161529
KATNB1;360;	0.0028039	0.000173684	0.00884842	0.928474	0.000803607	0.000381726	0.0003206	0.00111997	0.000170759	0.0454968	0.000132269	0.00561668	0.000544116	0.000840496	0.00075533	0.0032318	0.000285841
ZNRF2;20;	8.94601e-06	0.0600218	1.00546e-05	1.29337e-06	0.000159517	0.000908008	0.0018781	3.69765e-05	0.430045	5.75991e-07	0.50179	6.61108e-07	0.000264856	1.74012e-05	8.69957e-05	1.48796e-06	0.00476904
PERI;82;	0.000279968	5.24132e-05	0.00115857	0.0214481	7.98156e-05	4.63598e-05	4.08545e-05	0.000182059	3.26138e-05	0.936921	4.37819e-05	0.0338887	0.000121331	0.000778964	8.35495e-05	0.00480268	3.97021e-05
MSK1;380;	5.4777e-05	0.000299069	4.15586e-05	6.68628e-06	0.00577417	0.00253671	0.0847525	3.2093e-05	0.0466672	1.15087e-06	0.000855436	1.27314e-06	0.00299506	7.00719e-06	0.000251608	4.40094e-06	0.855719
ARHGEF12;1328;	0.00146699	0.000180632	0.00270339	0.00165228	0.0483692	0.0300841	0.00497344	0.103093	0.000812463	3.10782e-05	7.65554e-05	9.07078e-06	7.56552e-05	3.27767e-05	0.805416	9.32454e-06	0.00101411
MLLT1;284;	0.00097536	0.0067996	0.00120187	0.000798571	0.00048856	0.000507209	0.000783271	0.000532234	0.00209326	0.0075026	0.0352809	0.11134	0.0387311	0.0888779	0.000329313	0.702068	0.00169065
ABI1;231;	2.78387e-05	0.0546493	4.43842e-05	6.75614e-06	0.000103285	0.00027286	0.000429478	5.91108e-05	0.00496063	6.55439e-06	0.935508	1.11158e-05	0.00207785	0.00046031	6.7373e-05	2.84184e-05	0.00128698
ARHGEF17;414;	7.85576e-06	0.896656	2.57659e-05	1.85507e-06	0.000183923	0.000866811	0.000995113	6.29058e-05	0.0321701	1.01227e-06	0.0672819	1.05053e-06	0.000164339	5.27547e-05	0.000131265	2.0834e-06	0.00139537
KIAA0147;1212;	0.000336025	0.0398065	0.000159465	3.73826e-05	0.00248883	0.012676	0.0132248	0.00136207	0.580995	1.48503e-05	0.330284	1.51548e-05	0.00165038	0.000186981	0.00240395	2.73278e-05	0.0143312
BCAR1;305;	2.17062e-06	0.000134401	3.05574e-06	2.75424e-07	0.00119526	0.00370733	0.128329	5.60923e-06	0.736673	4.93147e-08	0.000134231	4.49761e-08	3.35094e-05	5.14375e-07	7.86241e-05	1.12781e-07	0.129703
EPB4.1L2;86;	0.023448	1.79281e-05	0.000112062	0.974648	0.000209146	0.000124949	8.11154e-05	0.000304087	3.97106e-05	0.000415837	2.01387e-05	9.69583e-05	6.43861e-05	2.31243e-05	0.000258258	8.24438e-05	5.34487e-05
RTKN;520;	1.09276e-06	0.989776	1.00477e-05	4.90989e-07	1.4425e-05	3.69598e-05	4.86337e-05	1.02534e-05	0.000482736	5.00586e-07	0.00937269	5.94809e-07	4.21411e-05	9.83773e-05	1.11814e-05	1.12756e-06	9.24915e-05
EIF4B;422;	1.32819e-08	1.01827e-06	7.09759e-09	1.13403e-09	1.47985e-06	8.79816e-06	0.000148301	2.1586e-08	0.999418	2.32449e-10	2.76484e-06	2.34561e-10	2.61713e-07	2.67603e-09	1.92684e-07	6.14655e-10	0.000419426
IRS1;306;	8.69348e-06	0.00106092	1.39431e-05	1.29562e-06	0.0076842	0.33149	0.192168	0.000117283	0.45434	2.17837e-07	0.000264114	1.55059e-07	2.73329e-05	2.45486e-06	0.00257877	2.88961e-07	0.0102425
FRS2;135;	1.94533e-05	0.000198874	5.24253e-06	1.32749e-06	0.000614937	0.00102153	0.0232659	8.61564e-06	0.245393	2.61313e-07	0.00160302	3.18035e-07	0.00147581	2.0979e-06	5.64737e-05	1.08874e-06	0.726332
A2LP;27;	0.00359115	0.020918	0.00180628	0.000960375	0.00279062	0.00291452	0.0065998	0.00125161	0.0253082	0.00149712	0.410847	0.00571051	0.450489	0.0110123	0.00129269	0.0337989	0.0192117
MLTK;634;	0.00773806	9.06578e-05	0.0016599	0.979146	0.000848142	0.000347323	0.000328769	0.000549612	0.000145818	0.0046821	8.84338e-05	0.00126135	0.000550854	0.000214092	0.000579684	0.00149027	0.000279011
COBLL1;281;	0.000232245	0.101598	0.0022435	0.000205069	0.000534534	0.000771296	0.00106635	0.000789415	0.00415296	0.00091507	0.146027	0.00250666	0.0121953	0.719278	0.000438541	0.00456534	0.00248024
CABLES1;248;	0.000648163	0.108611	0.0860587	0.000464574	0.0837506	0.0456005	0.149116	0.00415189	0.126664	0.000176173	0.0276164	0.000160469	0.0249689	0.00347631	0.0154984	0.000386907	0.32265
DUSP16;454;	0.174944	0.000655981	0.00387977	0.102573	0.0528825	0.0385629	0.00894284	0.221268	0.00295109	0.000569897	0.000494241	0.000143578	0.000529887	0.000203868	0.388811	0.00012776	0.0024596
TJP2;441;	0.0205905	0.00178902	0.0281197	0.829777	0.00608626	0.00428132	0.00274482	0.0164773	0.00153621	0.0540077	0.0011175	0.00892781	0.00267005	0.00586639	0.0085488	0.0052991	0.0021604
SIPA1;72;	3.81428e-06	6.92782e-05	1.86585e-06	3.19265e-07	0.00343701	0.0919555	0.331776	1.29602e-05	0.565192	4.29643e-08	5.62115e-05	3.31699e-08	1.00305e-05	3.27725e-07	0.000374744	6.99622e-08	0.00710926
MAST4;1417;	0.000150317	0.0128809	0.000672689	0.000173706	0.000152361	0.000245994	0.000208567	0.000567559	0.000659876	0.00163772	0.0106456	0.00323516	0.00106014	0.965136	0.000201271	0.00207998	0.000292286
AF013969;795;	7.47731e-07	6.3493e-05	1.00548e-06	9.47042e-08	0.000241678	0.000685825	0.0266557	2.04607e-06	0.915248	1.95736e-08	8.63559e-05	1.86075e-08	1.53287e-05	2.2082e-07	2.06925e-05	4.72572e-08	0.0569782
MAP1A;2420;	2.34905e-06	4.26474e-05	1.50294e-06	2.30536e-07	0.00139877	0.00301723	0.600628	4.06572e-06	0.214943	3.51398e-08	5.55573e-05	3.13297e-08	2.49876e-05	2.85176e-07	6.00874e-05	8.04198e-08	0.179821
ARHGAP7;195;	3.14845e-06	0.00221396	4.29325e-06	8.04215e-07	7.61092e-06	1.53853e-05	2.88379e-05	5.05711e-06	0.000348807	1.15386e-06	0.996776	2.64894e-06	0.000410623	7.51448e-05	4.75724e-06	7.7088e-06	9.40518e-05
ABH5;362;	3.32637e-05	0.231758	0.000124042	7.88743e-06	0.000667608	0.00206107	0.00353582	0.00020453	0.153786	4.6952e-06	0.599018	5.46999e-06	0.0010059	0.00016499	0.000399406	1.1469e-05	0.00721201
GLNS;322;	0.000364937	0.620989	0.0168821	0.000215268	0.0100468	0.0174584	0.0273974	0.00510677	0.101827	0.000157242	0.119466	0.000155304	0.00932809	0.0078379	0.00661889	0.000276715	0.0558722
EI24;344;	0.00211464	0.000190586	0.000687325	0.000712369	0.324923	0.108224	0.0158632	0.0077292	0.00140555	1.3482e-05	8.40055e-05	5.15858e-06	0.000112709	2.05967e-05	0.535924	7.24433e-06	0.0019842
MAF1;75;	5.89514e-07	2.98328e-05	4.97506e-07	6.14554e-08	0.000181981	0.00170825	0.0147575	2.37867e-06	0.979111	1.09849e-08	3.45161e-05	9.37496e-09	3.6962e-06	1.04153e-07	3.02047e-05	2.04342e-08	0.00413978
PDE3B;588;	1.28863e-07	7.45586e-06	9.30785e-08	1.23609e-08	5.5676e-05	0.000613352	0.00603124	3.85341e-07	0.992342	2.11737e-09	7.48597e-06	1.82491e-09	8.8057e-07	2.10725e-08	6.3749e-06	4.17292e-09	0.000934432
UVRAG;521;	8.63575e-06	0.000219532	3.58814e-06	6.91343e-07	0.00125133	0.05358	0.0318306	5.62023e-05	0.908159	1.11649e-07	0.000228033	8.52846e-08	1.57271e-05	8.95836e-07	0.00072676	1.58173e-07	0.00391832
ARHGAP23;426;	0.00186886	0.173033	0.00752645	0.00117247	0.00291225	0.0050478	0.00542599	0.00855345	0.0258476	0.00382651	0.557215	0.00695296	0.0202025	0.160029	0.00344831	0.00747795	0.0094606
PDAP1;176;	3.25939e-06	9.60412e-05	2.89488e-06	3.80828e-07	0.004271	0.887966	0.0512512	3.92123e-05	0.0531196	5.02261e-08	3.602e-05	3.36786e-08	4.71215e-06	4.00497e-07	0.00192204	6.01011e-08	0.00128756
THRAP3;268;	9.53838e-05	0.00152877	0.000732525	0.000210981	7.71455e-05	7.96516e-05	9.03323e-05	0.000169259	0.000202411	0.00964756	0.00205887	0.111675	0.00114878	0.822702	7.25552e-05	0.0493621	0.000146231
EEF2K;77;	0.000757668	0.0655526	0.00130481	0.000336954	0.000871874	0.00132836	0.0017882	0.00100136	0.00993204	0.00108345	0.811567	0.00360005	0.029408	0.0585367	0.000688426	0.00844076	0.00380206
AKT1S1;255;	1.20458e-06	0.00108284	1.2252e-06	1.50126e-07	4.5224e-05	0.000242587	0.000765776	4.38042e-06	0.990987	5.11707e-08	0.00531636	5.46101e-08	2.63218e-05	9.52411e-07	1.69741e-05	1.26216e-07	0.00150889
DUSP16;453;	0.0281094	0.000505002	0.0035544	0.0568819	0.017956	0.0174322	0.00335943	0.596461	0.00135874	0.000508871	0.000283919	0.000100677	0.000224581	0.000190452	0.272037	7.24109e-05	0.000964158
PDE3B;577;	0.000309801	0.0235077	0.000238389	7.80755e-05	0.000323151	0.000661827	0.00103	0.000309857	0.00691704	0.000121284	0.936963	0.000321188	0.0204357	0.00445249	0.000236468	0.000887615	0.00320597
ARHGEF2;169;	0.000308871	0.486334	0.00448408	0.000153456	0.00408149	0.0066804	0.0117322	0.00306576	0.0764538	0.00016668	0.36212	0.000197269	0.00908451	0.00908137	0.00285726	0.000354445	0.0228441
ARHGAP6;712;	0.000392051	0.0216798	0.00038399	9.03519e-05	0.000669425	0.00120542	0.00233272	0.000466253	0.0177759	0.000107776	0.918331	0.000237046	0.0254161	0.00222215	0.000418973	0.000653562	0.00761801
DENND4A;1282;	1.60455e-07	0.000101333	1.21265e-07	1.71056e-08	6.8504e-06	5.43555e-05	0.000176249	4.98638e-07	0.99894	4.96916e-09	0.000356526	5.15758e-09	3.02622e-06	8.60794e-08	2.3784e-06	1.20625e-08	0.000358477
TMCC3;235;	7.60803e-07	0.000100583	8.46517e-07	9.20867e-08	9.7736e-05	0.00042178	0.00336659	2.73623e-06	0.991799	2.23241e-08	0.000188743	2.12854e-08	1.06981e-05	2.69007e-07	1.92947e-05	4.94769e-08	0.00399105
CKLFSF4;199;	4.7697e-06	0.000335745	5.70787e-06	5.84431e-07	0.0037832	0.0264461	0.0882281	2.13497e-05	0.87237	1.01771e-07	0.000198527	8.18737e-08	2.48681e-05	1.01544e-06	0.00044139	1.76711e-07	0.00813807
AKT1;473;	0.00159675	0.250606	0.00216591	0.000366852	0.0417065	0.0736126	0.099609	0.00392719	0.322367	0.000121151	0.0976815	0.000111531	0.0159418	0.00218064	0.0154177	0.00025679	0.0723309
KIAA1029;535;	5.35461e-05	0.832312	0.000904619	3.37057e-05	0.000352559	0.000693739	0.000683557	0.000491171	0.00464039	6.53906e-05	0.135604	8.56205e-05	0.00120497	0.0213356	0.000360147	0.000127394	0.00105149
LARP4;396;	0.000522379	2.27039e-05	0.000279727	0.0672263	4.34568e-05	2.87749e-05	2.39529e-05	0.000132684	1.97719e-05	0.901193	2.59155e-05	0.0274473	7.01437e-05	0.000196794	5.21412e-05	0.00269216	2.33338e-05
CCDC88A;1421;	5.13613e-06	0.000638526	2.88225e-06	5.01752e-07	0.000501127	0.0200554	0.00941782	4.0387e-05	0.966415	9.74237e-08	0.000410336	7.68203e-08	1.43173e-05	1.11154e-06	0.000366144	1.42207e-07	0.00213111
BCAR1;308;	7.27152e-05	0.00251044	0.000110578	1.05449e-05	0.0137326	0.045273	0.236581	0.000168572	0.268364	1.7568e-06	0.00206687	1.5762e-06	0.000862754	1.74494e-05	0.0017667	3.83097e-06	0.428456
SCARF2;692;	5.03363e-06	0.0034134	5.27335e-06	6.46142e-07	0.000172088	0.000653957	0.00223585	1.45149e-05	0.965605	2.32788e-07	0.0232256	2.59322e-07	0.000139068	4.23614e-06	5.63651e-05	6.32538e-07	0.00446757
AS160;348;	3.0982e-06	0.0103098	1.02156e-05	5.7445e-07	0.000381139	0.00236024	0.00628586	2.09201e-05	0.967578	1.77172e-07	0.00321898	1.68655e-07	6.58944e-05	4.10453e-06	0.00012069	3.72274e-07	0.00963981
DDX21;218;	0.234554	0.00252072	0.0113468	0.0494418	0.245993	0.0801284	0.133952	0.0277523	0.0241827	0.00113255	0.00344374	0.000623295	0.0156705	0.000719732	0.0808895	0.00114628	0.0865031
NFATC3;345;	6.08425e-06	0.000986301	1.36932e-05	9.40853e-07	0.00497754	0.0323333	0.163546	2.82091e-05	0.754697	1.71943e-07	0.000375946	1.43628e-07	5.94075e-05	2.16318e-06	0.000502436	3.25157e-07	0.0424696
AKT2;34;	0.00450787	0.0241023	0.000505313	0.00026991	0.0147514	0.121422	0.0545666	0.0132862	0.619284	5.95789e-05	0.0847027	4.9099e-05	0.00296639	0.000342219	0.0260202	7.59242e-05	0.0330888
KIAA1029;1002;	5.00965e-05	0.62855	0.000146944	1.47293e-05	0.000293545	0.00111879	0.000980226	0.000327721	0.0122169	1.26609e-05	0.352407	1.5133e-05	0.000844567	0.000975305	0.000317417	2.59176e-05	0.0017031
ADCY9;1259;	1.14697e-05	0.00657295	6.00987e-06	1.13399e-06	0.000169063	0.00107589	0.00284925	2.48927e-05	0.874277	3.95993e-07	0.105507	4.59436e-07	0.000307007	7.77636e-06	7.41375e-05	1.11919e-06	0.0091141
MCG_123682;401;	0.237988	0.000438518	0.00577929	0.641277	0.0485761	0.0118235	0.0104856	0.00804005	0.00200128	0.000974396	0.000415281	0.000339251	0.00224857	0.000243598	0.0234704	0.000519002	0.00537953
CORO1B;413;	4.53213e-06	0.00197144	6.25163e-06	6.44373e-07	0.000329563	0.000780883	0.0107878	7.90075e-06	0.820913	1.9039e-07	0.00533435	2.22706e-07	0.000520383	3.58799e-06	4.35559e-05	6.80318e-07	0.159295
FAM13A;321;	0.00733777	0.0357891	0.0022502	0.00269916	0.00250879	0.00317455	0.00479407	0.00221049	0.0152916	0.00796384	0.311518	0.0449523	0.242079	0.0780001	0.00165793	0.227358	0.0104154
KIAA0701;420;	0.000434202	0.0295584	0.000359677	6.43421e-05	0.00255931	0.00481705	0.0111118	0.000576528	0.181043	3.5514e-05	0.726624	5.10253e-05	0.0146761	0.00047532	0.00113078	0.000135734	0.0263478
RIN2;495;	5.00099e-05	0.108484	3.26938e-05	6.56642e-06	0.000410435	0.00237862	0.00330356	0.000162534	0.156397	3.07746e-06	0.721069	3.55256e-06	0.00091447	9.17943e-05	0.000290999	7.62603e-06	0.00639413
SECISBP2;229;	0.000985787	0.0211335	0.802887	0.00390768	0.00563514	0.00390202	0.00336574	0.0106247	0.00461142	0.0118793	0.00736295	0.00643505	0.00401728	0.0989315	0.00627636	0.00468259	0.00336186
CCM2;402;	9.84364e-06	0.00619262	1.19263e-05	1.66312e-06	6.81872e-05	0.000154556	0.000425108	1.31649e-05	0.0114242	1.0272e-06	0.977755	1.6983e-06	0.00179396	2.97562e-05	2.65496e-05	5.40422e-06	0.00208573
DVL3;700;	0.000284594	0.030695	0.00743501	0.000127378	0.359889	0.201684	0.158256	0.00440792	0.120742	2.6942e-05	0.00440314	1.71636e-05	0.00117274	0.000296216	0.0780879	3.07842e-05	0.0324445
100043914;89;	8.20073e-05	0.00296266	6.63501e-05	1.66358e-05	0.000209418	0.000234245	0.000948736	3.40063e-05	0.00532694	1.38486e-05	0.159494	3.88869e-05	0.822711	0.000265077	5.7877e-05	0.000278832	0.00725957
APBB2;341;	5.70634e-05	0.0145748	0.000231556	1.34306e-05	0.00549038	0.00431448	0.0591023	9.64418e-05	0.276746	4.6058e-06	0.0223589	5.69396e-06	0.0152677	8.72848e-05	0.000496505	2.01068e-05	0.601133
MTMR1;53;	1.66288e-05	0.00786655	3.48172e-05	2.82424e-06	0.00594555	0.0331833	0.0867491	8.37495e-05	0.831472	6.11175e-07	0.0018533	5.17924e-07	0.000183172	9.88996e-06	0.0010103	1.16146e-06	0.0315867
MCG_23367;64;	0.998905	2.57072e-06	5.03592e-06	0.000392653	0.00016254	0.000133927	7.11271e-05	6.79173e-05	2.31932e-05	1.98415e-06	4.14598e-06	9.17405e-07	1.02606e-05	7.15583e-07	0.000184621	1.30678e-06	3.20347e-05
MYH10;1974;	0.619322	0.00116268	0.00298462	0.0453035	0.0835152	0.070336	0.0435042	0.0244852	0.00845568	0.000438433	0.0012519	0.000203312	0.0037651	0.000295817	0.0728177	0.000309678	0.021849
ECM2;79;	0.0105966	0.000243648	0.00508999	0.945681	0.00141702	0.000849809	0.000698204	0.0046814	0.000361454	0.0213798	0.000233626	0.00328104	0.000692745	0.000660136	0.00182536	0.00170774	0.000600121
KIAA0313;960;	2.90486e-06	0.000767376	2.79945e-06	3.36414e-07	0.000243446	0.00137505	0.00352202	9.97215e-06	0.9903	8.87975e-08	0.00118934	8.45422e-08	3.2124e-05	1.24069e-06	6.92577e-05	1.91124e-07	0.00248382
DOCK7;1420;	0.00678074	0.000316586	0.00794327	0.955455	0.00188284	0.001309	0.000672086	0.00951993	0.000330116	0.00869838	0.000183431	0.000990022	0.000355364	0.000724523	0.00388885	0.000512819	0.000437496
LMN1;404;	6.19456e-08	4.03317e-06	4.75826e-08	6.04505e-09	1.32253e-05	8.2049e-05	0.00115226	1.54521e-07	0.997753	1.17208e-09	7.01403e-06	1.09414e-09	7.19329e-07	1.21829e-08	1.70434e-06	2.63484e-09	0.00098566
ARA55;186;	5.59559e-05	0.0937153	7.48227e-05	1.1052e-05	0.000460014	0.00106192	0.0020351	0.000124226	0.0388441	7.71945e-06	0.856301	1.07347e-05	0.00275147	0.000292951	0.000225538	2.79062e-05	0.00400012
ENO1;349;	0.00023325	2.97859e-05	0.000128443	0.00465617	2.17244e-05	2.06465e-05	1.446e-05	0.000135815	1.67024e-05	0.957258	3.34012e-05	0.0356355	4.17125e-05	0.000416807	3.55641e-05	0.0013077	1.41828e-05
BAT2L;1147;	0.000142277	0.021074	0.000169442	2.44838e-05	0.00347898	0.00448128	0.0441666	0.000155474	0.284891	9.14459e-06	0.0899141	1.25413e-05	0.0511962	0.00017525	0.000530548	4.65944e-05	0.499532
KIAA0324;1416;	0.006626	0.000750097	0.162833	0.759771	0.0124316	0.00425868	0.00268627	0.0186524	0.000927839	0.00880758	0.000361581	0.00121916	0.000923342	0.00132951	0.0159873	0.000900167	0.00153437
TMEM63B;111;	0.00015019	0.00156985	0.000103597	1.76008e-05	0.00465316	0.00326338	0.0526648	7.49502e-05	0.164595	4.38888e-06	0.010555	5.8623e-06	0.030988	3.37286e-05	0.000389428	2.31382e-05	0.730908
SCARF2;695;	1.2437e-06	0.000845316	1.65968e-06	1.71893e-07	8.02949e-05	0.000340075	0.00152327	4.95474e-06	0.992595	5.51667e-08	0.00199317	5.66773e-08	2.78659e-05	9.65431e-07	2.30899e-05	1.32826e-07	0.00256273
CPLA2;726;	2.41086e-08	7.7647e-06	1.80863e-08	2.48567e-09	1.47074e-06	8.752e-06	5.85966e-05	5.91045e-08	0.999732	6.72244e-10	2.88526e-05	7.06482e-10	5.99757e-07	1.03685e-08	3.37498e-07	1.77146e-09	0.000161547
EEF2K;76;	4.53222e-05	0.00910509	3.53652e-05	9.11055e-06	8.96938e-05	0.00019887	0.000328703	5.33528e-05	0.00386703	9.18894e-06	0.981888	1.85162e-05	0.00297737	0.000287738	5.81464e-05	5.08542e-05	0.000977489
ZC3HAV1;265;	0.293099	0.00276178	0.028216	0.348289	0.0984694	0.0299066	0.043071	0.00950741	0.0110476	0.00417589	0.0033567	0.00265319	0.0444427	0.00170643	0.0270934	0.00687846	0.0453256
FCHSD2;699;	0.00238125	0.0461565	0.00847811	0.00221228	0.00208387	0.00256557	0.00366358	0.00270584	0.00975016	0.0118063	0.145685	0.0619641	0.0982293	0.434877	0.00156799	0.156759	0.00911389
EPB4.1L1;474;	2.38331e-06	0.000186845	6.79688e-06	4.08417e-07	0.00392097	0.00652696	0.592284	9.42317e-06	0.171482	7.23359e-08	0.000100029	6.17839e-08	3.65186e-05	7.97372e-07	0.000153473	1.50928e-07	0.225288
AMOTL1;807;	0.00036884	0.000162521	0.000835035	0.00645579	8.88561e-05	7.73735e-05	6.69525e-05	0.000394302	7.03599e-05	0.84017	0.000147191	0.136996	0.000251679	0.00477523	0.000114531	0.00894795	7.70874e-05
KIAA1111;984;	9.20572e-06	0.00468074	1.92903e-05	1.46897e-06	0.000579585	0.00237587	0.00811575	4.90141e-05	0.959939	4.85308e-07	0.00885518	4.86537e-07	0.000173633	8.14389e-06	0.000202232	1.07311e-06	0.0149888
AP1AR;225;	4.34258e-06	0.150764	1.32737e-05	1.09306e-06	5.75087e-05	0.000153402	0.000300428	1.72393e-05	0.00982064	7.96799e-07	0.837686	1.08416e-06	0.000301029	4.77955e-05	3.02468e-05	2.62985e-06	0.000798378
B9L;994;	0.00413283	0.120035	0.0063624	0.000875096	0.0334725	0.159346	0.0695069	0.0420451	0.321252	0.000267986	0.113368	0.000206213	0.00691316	0.00235267	0.0630263	0.000286246	0.0565515
ACLY;455;	6.47546e-07	0.00138823	9.55425e-07	9.01702e-08	3.67571e-05	0.000250547	0.000652396	3.05652e-06	0.994394	2.96414e-08	0.0021403	3.01857e-08	1.33515e-05	6.28749e-07	1.39055e-05	6.7918e-08	0.00110544
FKHR2;310;	1.24134e-05	0.0123619	2.68916e-05	2.12955e-06	0.00122093	0.00681785	0.00924637	0.000112987	0.958215	6.61534e-07	0.00629873	5.77314e-07	0.000102238	1.13188e-05	0.000614925	1.12152e-06	0.00495412
FRAP;2473;	1.26164e-06	0.000348598	1.61201e-06	1.59401e-07	0.000277682	0.00958672	0.00696565	1.25809e-05	0.980945	3.29936e-08	0.000143061	2.62133e-08	5.66862e-06	4.35628e-07	0.000139375	4.99712e-08	0.00157186
LIPE;694;	1.22975e-05	2.21844e-06	2.42445e-05	0.000525913	2.18777e-06	1.49457e-06	1.36713e-06	5.65019e-06	1.29051e-06	0.959548	2.33105e-06	0.0388384	6.3653e-06	4.71767e-05	2.32587e-06	0.000977079	1.51756e-06
JMJD1B;799;	0.00348472	0.000521003	0.00169865	0.000733317	0.539036	0.0812237	0.233832	0.00172063	0.00856356	2.59338e-05	0.000422276	1.61041e-05	0.00206769	5.29038e-05	0.0251232	3.62859e-05	0.101442
GARNL3;449;	0.000223937	0.111908	0.000339322	7.26758e-05	0.00066652	0.00107852	0.00173148	0.00039093	0.013375	0.000104147	0.847902	0.000196834	0.0114771	0.00627681	0.000413117	0.000520647	0.00332299
EIF4EBP1;44;	1.7371e-05	0.00794564	4.94916e-05	3.10412e-06	0.0011908	0.00254637	0.0194011	4.98923e-05	0.81405	1.07085e-06	0.0208913	1.2251e-06	0.0012236	1.99059e-05	0.000222956	3.35036e-06	0.132383
WDR81;1570;	4.51954e-06	3.76546e-05	2.10766e-06	3.69781e-07	0.00109768	0.00209298	0.236875	5.32731e-06	0.144236	5.56872e-08	8.58332e-05	5.24268e-08	5.16888e-05	3.80395e-07	6.10598e-05	1.39303e-07	0.61545
MNCB-3527;736;	0.000413322	0.0248735	0.000937337	7.73027e-05	0.0113703	0.0269191	0.0809043	0.00134251	0.519311	2.38619e-05	0.0592154	2.50759e-05	0.00774571	0.000275052	0.00412676	5.70422e-05	0.262383
SOS1;1123;	5.53376e-06	0.0121714	1.53754e-05	1.01439e-06	0.000715818	0.00212905	0.00902064	2.41646e-05	0.958096	3.34187e-07	0.00623379	3.35032e-07	0.000168652	7.48486e-06	0.000147831	8.19539e-07	0.0112616
TENS1;752;	7.37196e-06	0.00816321	9.89808e-06	1.67746e-06	2.47972e-05	5.72063e-05	9.84362e-05	1.56787e-05	0.00145819	1.90285e-06	0.989301	3.41062e-06	0.000471976	0.000102717	1.62578e-05	8.53801e-06	0.000257297
LRRFIP2;324;	3.86054e-06	8.7903e-07	4.04241e-06	5.13918e-05	5.54359e-07	4.30954e-07	4.26742e-07	1.44113e-06	4.8292e-07	0.0940771	1.20855e-06	0.904115	3.06534e-06	2.33641e-05	5.67191e-07	0.00171568	5.32443e-07
KIAA1029;765;	0.00314168	0.237718	0.227868	0.00419152	0.0359879	0.0377122	0.0324856	0.104821	0.0669783	0.00499633	0.0748473	0.00304205	0.0117207	0.0718722	0.0521049	0.00286228	0.0276495
KIAA0991;30;	0.0238258	0.000626399	0.000266226	0.00047532	0.362273	0.184424	0.313509	0.00122464	0.0268945	1.85719e-05	0.000882085	1.31121e-05	0.00255272	3.79346e-05	0.0237339	3.18376e-05	0.0592106
BAT2;1104;	0.0011425	0.0414496	0.000816697	0.000160072	0.00787894	0.0130061	0.0355394	0.00071278	0.277352	5.99926e-05	0.383533	8.88135e-05	0.0998531	0.000747944	0.0022135	0.000304471	0.135141
KIAA4119;1009;	0.0120333	0.079392	0.00916181	0.00596539	0.00582546	0.00814215	0.00867876	0.0106	0.0319454	0.0210217	0.443849	0.0604411	0.0712367	0.13274	0.00584772	0.0794522	0.0136672
DUSP16;450;	0.0300679	0.00125836	0.026813	0.362003	0.0397637	0.0203035	0.0062379	0.289982	0.00245127	0.00305083	0.000639661	0.000492921	0.000695274	0.000781489	0.213017	0.000340732	0.00210215
NEK3;317;	1.79765e-05	0.000945298	3.93592e-06	1.12561e-06	0.000234892	0.00145486	0.00491784	1.62685e-05	0.96325	2.80812e-07	0.0127243	3.22564e-07	0.000340449	3.32199e-06	7.27809e-05	8.55564e-07	0.0160158
KIF13A;1481;	0.00338166	0.2707	0.0035978	0.001205	0.00459374	0.0127384	0.00798434	0.0295502	0.0518608	0.00176995	0.551353	0.00174978	0.00720856	0.0329685	0.00954955	0.00156301	0.008226
PERI;126;	0.00933253	0.000960064	0.0212616	0.498027	0.00236638	0.00144618	0.00140593	0.00629596	0.000903021	0.361271	0.000893052	0.0596643	0.0030003	0.0061317	0.00248613	0.0230467	0.00150781
PTPN4;403;	2.87679e-07	2.14827e-05	2.22602e-07	2.88225e-08	0.000102201	0.00383481	0.0076217	1.65391e-06	0.98754	4.95151e-09	1.52526e-05	3.97418e-09	1.16996e-06	5.07555e-08	2.65497e-05	8.08413e-09	0.000834599
LPIN2;283;	2.45099e-05	0.896641	0.000386601	1.31564e-05	0.000318219	0.000547934	0.00102086	0.000139155	0.00586945	1.54439e-05	0.0857463	2.17552e-05	0.00245785	0.00381267	0.000170422	5.24191e-05	0.00276201
HBO1;207;	8.54528e-06	0.000167194	1.24277e-05	1.17097e-06	0.0336203	0.0621858	0.753003	3.72815e-05	0.128771	1.60469e-07	0.000102945	1.20665e-07	3.29682e-05	1.17028e-06	0.00122156	2.59984e-07	0.0208341
FRYL;1960;	7.98492e-08	4.30624e-05	9.56004e-08	9.94585e-09	1.0603e-05	8.86343e-05	0.000528045	3.21306e-07	0.998597	2.47889e-09	3.83002e-05	2.3573e-09	1.38227e-06	4.12402e-08	2.34749e-06	5.50933e-09	0.000690201
SOS1;1147;	2.03219e-07	1.66638e-06	1.41711e-07	2.23794e-08	0.000417084	0.997363	0.00141843	3.15636e-06	0.00033493	2.25015e-09	6.92538e-07	1.37066e-09	1.35499e-07	1.32187e-08	0.000432491	2.27725e-09	2.85152e-05
TJP2;988;	0.982042	4.93969e-05	7.57697e-05	0.0142112	0.000494635	0.000556514	0.000315999	0.000649785	0.000179003	0.00011656	7.8853e-05	5.40011e-05	0.000192216	2.79365e-05	0.000673227	6.4698e-05	0.000217747
B9L;116;	0.464397	0.00343834	0.00746238	0.040344	0.0627798	0.0359108	0.0786953	0.0103427	0.0306037	0.00191111	0.00905406	0.00179545	0.0936655	0.00121854	0.02057	0.00483616	0.132975
ERF;20;	0.000221601	0.00109522	4.509e-05	1.36917e-05	0.00300971	0.00455942	0.0493217	5.89749e-05	0.18586	2.6931e-06	0.00901585	3.49655e-06	0.020999	1.95488e-05	0.000333153	1.30795e-05	0.725427
ANKS1;659;	0.00495089	0.000435336	0.00627407	0.11862	0.000965226	0.000477024	0.00060594	0.000705649	0.000427724	0.172129	0.000562897	0.224162	0.00530944	0.0032343	0.00057044	0.459754	0.000816561
AS160;681;	0.00864961	0.00156593	0.24353	0.0877736	0.064941	0.0286737	0.00840369	0.231916	0.00269746	0.00161003	0.000608444	0.000316047	0.000716841	0.000837882	0.314486	0.00024925	0.00302381
MCG_122520;100;	0.591258	0.000487471	0.00228485	0.285119	0.0257067	0.0171807	0.00670594	0.0196871	0.00191734	0.000621614	0.000418098	0.00019276	0.000961845	0.000203613	0.0442699	0.000220256	0.00276551
3BP1;553;	6.41045e-06	9.25185e-05	3.04157e-06	5.6393e-07	0.00192666	0.00428925	0.329754	8.31836e-06	0.377796	8.60665e-08	0.000158909	7.97784e-08	7.4074e-05	6.71983e-07	0.000106501	2.10758e-07	0.285783
5730494N06RIK;24;	0.989367	1.5827e-05	5.35239e-05	0.00697081	0.000987625	0.000589006	0.000425394	0.000303822	0.000115262	2.00897e-05	2.38232e-05	9.34244e-06	9.87341e-05	5.93862e-06	0.000754598	1.44919e-05	0.00024489
KIAA0599;736;	0.00519069	0.000277632	0.00239406	0.229255	0.00046064	0.000317744	0.000303995	0.000894249	0.000235976	0.527569	0.000328884	0.174111	0.00142167	0.00243871	0.000440491	0.0540039	0.000356522
[truncated: 2,543 more rows]
